# Supplementary material for: Comprehensive mapping of the 5′ and 3′ untranslated regions of Aspergillus fumigatus reveals new insights into gene regulation
Source: bioRxiv preprint, doi:10.1101/2025.07.04.662582, version 1 (2025-07-04)
Supplement: Table_S1 [file 662582_file03.xlsx]

## Sheet: Tabelle1
Gene_ID	baseMean	log2FoldChange	lfcSE	stat	pvalue	padj
AFUB_017510	5,452,592,281	0.614491	0.0626272	9,811,888,607	1.00E-08	6.13E-07
AFUB_049500	2,455,304,863	-0.27324	0.0298789	-9,144,910,992	5.97E-06	1.83E-02
AFUB_029740	1,307,240,933	-0.213272	0.0350144	-609,096,232	1.12E+05	1.73E+08
AFUB_044450	1,243,631,981	0.31836	0.0524858	6,065,639,642	1.31E+04	1.73E+08
AFUB_061910	4,538,530,366	-0.219845	0.0363121	-6,054,326,369	1.41E+05	1.73E+08
AFUB_094610	3,198,695,734	0.185768	0.0316137	5,876,192,772	4.20E+05	4.29E+08
AFUB_011640	7,862,529,614	-0.154388	0.0268935	-5,740,723,579	9.43E+05	7.22E+08
AFUB_081570	3,362,749,957	0.192667	0.0335265	5,746,694,816	9.10E+05	7.22E+08
AFUB_068280	1,491,439,041	0.15121	0.026774	5,647,628,922	1.63E+06	1.11E+09
AFUB_046580	144,115,427	0.250612	0.0447342	5,602,234,829	2.12E+06	1.30E+09
AFUB_036090	3,418,091,704	0.206295	0.0371326	5,555,625,802	2.77E+06	1.54E+09
AFUB_038680	453,219,353	-0.297755	0.0552633	-5,387,931,016	7.13E+06	3.64E+09
AFUB_066040	1,446,471,536	-0.263595	0.0492341	-5,353,903,963	8.61E+06	3.77E+09
AFUB_094820	1,606,009,387	0.204844	0.038232	5,357,912,205	8.42E+06	3.77E+09
AFUB_099880	216,231,774	0.229129	0.0430233	5,325,683,365	1.01E+07	4.11E+09
AFUB_101300	349,490,271	0.382231	0.0720909	5,302,069,695	1.14E+07	4.38E+09
AFUB_101210	4,310,497,728	-0.312746	0.059159	-5,286,528,048	1.25E+07	4.49E+09
AFUB_021420	2,424,940,055	0.167317	0.0318334	5,256,027,358	1.47E+07	5.01E+09
AFUB_019710	3,535,212,359	-0.156692	0.0301606	-5,195,266,927	2.04E+07	6.37E+09
AFUB_042310	3,035,491,202	0.227234	0.0437656	5,192,080,278	2.08E+07	6.37E+09
AFUB_084400	4,211,937,215	0.313962	0.0613692	5,115,963,974	3.12E+07	9.11E+09
AFUB_044850	4,133,641,552	0.339927	0.0666502	5,100,162,143	3.39E+07	9.45E+09
AFUB_100730	1,700,790,171	0.164275	0.0328871	4,995,124,431	5.88E+07	0.000156607
AFUB_015590	2,250,466,877	-0.295416	0.0598353	-4,937,152,656	7.93E+07	0.00020234
AFUB_048080	1,141,739,627	-0.229121	0.0467496	-4,901,012,184	9.53E+07	0.000233631
AFUB_079010	1,475,890,082	-0.168097	0.0344711	-4,876,444,678	1.08E+08	0.0002545
AFUB_007550	1,857,402,582	0.200638	0.0419967	4,777,465,141	1.78E+08	0.00040277
AFUB_058280	5,191,191,617	-0.131458	0.0275761	-4,767,084,253	1.87E+08	0.000408935
AFUB_015610	5,493,184,427	-0.343177	0.0749996	-4,575,714,776	4.75E+08	0.00100255
AFUB_034700	2,017,274,135	-0.156645	0.0350206	-4,472,938,928	7.72E+08	0.00152462
AFUB_048520	6,042,489,558	-0.12932	0.0288954	-447,546,408	7.62E+08	0.00152462
AFUB_056950	1,172,281,002	-0.187194	0.0422236	-4,433,402,143	9.28E+08	0.00167127
AFUB_064140	1,779,677,802	0.145905	0.0328676	4,439,162,476	9.03E+08	0.00167127
AFUB_079040	1,484,424,996	-0.208886	0.0470979	-4,435,150,664	9.20E+07	0.00167127
AFUB_047560	5,427,540,393	0.127571	0.0288526	4,421,485,798	9.80E+08	0.00171571
AFUB_034740	7,669,734,878	-0.138703	0.0316912	-4,376,694,519	1.20E+08	0.0020094
AFUB_055740	1,921,763,296	0.161235	0.0368526	437,512,199	1.21E+09	0.0020094
AFUB_095580	1,545,569,149	-0.180997	0.0417754	-4,332,627,842	1.47E+09	0.00237528
AFUB_089830	770,704,671	0.155143	0.0358811	4,323,796,529	1.53E+08	0.00240904
AFUB_044810	731,238,346	0.203598	0.0471752	4,315,793,731	1.59E+09	0.00243555
AFUB_006400	3,672,042,519	-0.132626	0.0308952	-429,276,947	1.76E+09	0.00263654
AFUB_025290	5,226,185,057	-0.329761	0.0774663	-4,256,839,318	2.07E+09	0.00295383
AFUB_039480	455,491,553	0.241272	0.0566469	4,259,217,939	2.05E+09	0.00295383
AFUB_046560	7,697,545,727	0.184413	0.04348	4,241,324,125	2.22E+09	0.0030937
AFUB_027430	5,433,327,251	-0.259969	0.0616961	-4,213,695,774	2.51E+09	0.00334567
AFUB_069970	407,869,951	-0.282766	0.067083	-4,215,164,171	2.50E+09	0.00334567
AFUB_091940	7,441,929,785	-0.3056	0.0735268	-4,156,312,527	3.23E+09	0.00421554
AFUB_022420	8,616,088,259	-0.1605	0.0390076	-411,456,738	3.88E+09	0.00492348
AFUB_078970	18,379,076	0.152185	0.0370182	4,111,079,193	3.94E+09	0.00492348
AFUB_040520	1,083,993,011	-0.164562	0.0403826	-4,075,077,155	4.60E+09	0.0055253
AFUB_070840	3,322,413,164	-0.259813	0.0636985	-4,078,787,567	4.53E+09	0.0055253
AFUB_041310	3,005,107,547	-0.27355	0.0681139	-4,016,069,391	5.92E+09	0.00697149
AFUB_052690	172,648,937	0.106755	0.0266516	4,005,577,672	6.19E+09	0.00702936
AFUB_092010	1,917,082,214	-0.141536	0.0353538	-4,003,409,699	6.24E+09	0.00702936
AFUB_094020	4,913,018,403	0.252069	0.0630035	4,000,868,388	6.31E+08	0.00702936
AFUB_048250	3,422,307,796	0.150458	0.0377304	3,987,715,247	6.67E+08	0.00729789
AFUB_018100	2,891,779,378	0.106889	0.0268878	3,975,392,022	7.03E+09	0.00755147
AFUB_013040	2,601,432,582	-0.291146	0.0734318	-3,964,845,743	7.34E+09	0.00775715
AFUB_019890	3,155,867,681	-0.120469	0.0305404	-3,944,564,679	7.99E+08	0.00775717
AFUB_046570	1,625,420,462	0.154986	0.0391857	3,955,167,987	7.65E+08	0.00775717
AFUB_047340	1,710,375,916	0.211349	0.0535591	394,608,535	7.94E+09	0.00775717
AFUB_051810	1,663,907,751	0.146891	0.0371833	3,950,441,435	7.80E+09	0.00775717
AFUB_096180	1,450,949,708	0.147116	0.0373267	3,941,299,823	8.10E+09	0.00775717
AFUB_099290	8,041,952,817	-0.164029	0.0414774	-3,954,651,938	7.66E+09	0.00775717
AFUB_022100	1,809,431,971	-0.236929	0.0603929	-3,923,121,211	8.74E+09	0.00811316
AFUB_041210	21,513,865	0.116232	0.0296118	3,925,174,246	8.67E+09	0.00811316
AFUB_027270	5,747,484,435	-0.132936	0.0339222	-3,918,854,876	8.90E+09	0.00813484
AFUB_081970	2,591,446,086	0.110823	0.0283409	3,910,356,644	9.22E+09	0.00830253
AFUB_077400	4,192,357,959	0.145365	0.0372794	3,899,345,612	9.65E+09	0.00856335
AFUB_025110	4,854,029,676	-0.159093	0.0409533	-3,884,754,338	0.000102433	0.00896439
AFUB_022080	1,883,486,943	0.151273	0.0391702	3,861,951,048	0.000112485	0.00968477
AFUB_046420	1,815,636,658	0.149968	0.0388953	3,855,681,078	0.000115408	0.00968477
AFUB_056340	659,981,845	-0.187975	0.0487233	-385,799,867	0.000114319	0.00968477
AFUB_004500	2,828,598,407	-0.275667	0.0717143	-3,843,966,804	0.000121061	0.00988829
AFUB_014760	8,374,401,363	0.184209	0.0478842	3,846,957,218	0.000119594	0.00988829
AFUB_092240	7,159,152,387	0.204659	0.0534667	3,827,779,906	0.000129304	0.0104226
AFUB_009310	2,872,326,118	-0.155191	0.0407303	-3,810,212,445	0.000138847	0.0110465
AFUB_005500	2,740,958,168	-0.277893	0.0732034	-3,796,171,248	0.000146948	0.0115411
AFUB_008230	2,052,969,903	-0.141657	0.03736	-379,166,733	0.000149639	0.0116037
AFUB_056870	2,410,843,769	-0.110385	0.0291817	-3,782,672,812	0.000155153	0.0118809
AFUB_084030	1,854,843,725	0.159116	0.0422383	3,767,101,052	0.000165154	0.0124905
AFUB_047590	2,534,248,447	0.282371	0.0750371	3,763,085,687	0.00016783	0.0125381
AFUB_075790	4,978,808,176	-0.257171	0.0684105	-3,759,235,041	0.000170434	0.0125792
AFUB_013460	7,097,960,449	-0.146472	0.0391647	-3,739,906,758	0.000184089	0.0131131
AFUB_037080	1,811,409,501	-0.124722	0.0333397	-3,740,939,961	0.000183333	0.0131131
AFUB_074520	1,021,580,656	0.158291	0.0422796	3,743,919,895	0.000181171	0.0131131
AFUB_088430	4,594,237,211	0.116619	0.0313748	3,716,966,069	0.00020163	0.0141975
AFUB_032380	6,299,037,637	-0.173833	0.0468787	-3,708,151,228	0.000208778	0.0143705
AFUB_065480	3,431,329,215	-0.162558	0.0438047	-371,095,992	0.000206475	0.0143705
AFUB_091300	1,620,040,967	-0.142196	0.0384552	-3,697,715,205	0.000217549	0.0148078
AFUB_058510	5,101,301,874	-0.216183	0.0585833	-3,690,177,573	0.000224098	0.015086
AFUB_065690	11,531,608,417,036	-0.13481	0.0366134	-3,681,997,686	0.000231414	0.0154091
AFUB_015090	182,879,652	-0.130294	0.0354258	-3,677,931,987	0.000235133	0.015412
AFUB_091650	2,898,958,928	-0.10501	0.0285628	-3,676,465,028	0.000236488	0.015412
AFUB_025150	4,057,252,607	0.115071	0.0313599	3,669,362,494	0.000243156	0.0156797
AFUB_091920	5,390,727,034	0.187825	0.0513447	365,811,357	0.000254078	0.0162134
AFUB_039340	9,458,078,529	-0.17361	0.0476266	-3,645,235,388	0.000267147	0.0168716
AFUB_049320	3,462,120,499	0.219367	0.0603169	3,636,913,543	0.000275924	0.0172481
AFUB_013820	2,950,909,656	-0.236155	0.0654145	-3,610,135,446	0.000306037	0.0187478
AFUB_063960	2,980,059,219	0.143511	0.0397432	3,610,965,257	0.00030506	0.0187478
AFUB_075060	6,989,623,672	-0.113825	0.0315625	-3,606,346,648	0.000310538	0.0188352
AFUB_029330	1,157,807,417	-0.134217	0.0374052	-3,588,193,528	0.000332977	0.0199982
AFUB_091900	7,238,839,093	-0.161824	0.0452397	-3,577,041,283	0.000347505	0.0206681
AFUB_063440	3,393,340,891	0.102249	0.0286075	3,574,207,106	0.000351291	0.0206924
AFUB_069420	2,878,656,109	0.103426	0.0289625	357,102,835	0.000355582	0.0207457
AFUB_073680	3,802,405,383	0.120002	0.03367	3,564,059,389	0.000365163	0.0211037
AFUB_040090	3,060,206,302	-0.227504	0.0639676	-3,556,554,627	0.00037575	0.0215126
AFUB_083240	3,106,392,284	-0.12816	0.0360759	-3,552,522,184	0.000381557	0.0216428
AFUB_023290	3,368,487,543	-0.104329	0.0296292	-3,521,156,656	0.000429669	0.0241482
AFUB_045240	5,227,869,046	0.190754	0.0543668	35,086,516	0.000450384	0.0248564
AFUB_078400	1,616,144,537	0.142795	0.0406773	3,510,434,962	0.000447374	0.0248564
AFUB_071390	184,440,879	0.114429	0.0327003	349,932,594	0.000466436	0.0252866
AFUB_094600	2,156,064,571	0.205927	0.05882	3,500,966,675	0.000463574	0.0252866
AFUB_027630	1,424,401,284	0.0860847	0.0246779	3,488,330,801	0.000486046	0.0254489
AFUB_048180	1,274,204,381	0.0996845	0.0285723	3,488,848,971	0.000485105	0.0254489
AFUB_050830	1,211,983,169	-0.168912	0.0483844	-3,491,046,818	0.000481132	0.0254489
AFUB_066770	3,572,172,536	0.0969882	0.0277589	3,493,952,986	0.000475925	0.0254489
AFUB_044960	7,750,972,464	-0.17851	0.0513697	-3,475,011,177	0.000510832	0.02652
AFUB_061580	5,369,387,203	-0.173698	0.0501237	-3,465,380,675	0.000529481	0.02703
AFUB_098950	2,054,131,412	0.126192	0.0363927	3,467,498,518	0.000525327	0.02703
AFUB_069630	3,947,279,397	0.101061	0.029199	3,461,121,135	0.000537931	0.0272344
AFUB_094830	1,311,614,179	0.134598	0.0390783	3,444,316,455	0.000572505	0.0287473
AFUB_065670	3,506,305,741	0.112718	0.0327988	3,436,655,286	0.000588945	0.0293323
AFUB_073730	7,580,881,909	0.102271	0.0298234	3,429,230,509	0.000605295	0.0299035
AFUB_047390	9,178,637,392	-0.152594	0.0445945	-3,421,799,872	0.000622081	0.0304869
AFUB_044900	9,001,737,036	0.158306	0.0464489	3,408,170,288	0.000654001	0.0317969
AFUB_002600	1,151,595,177	-0.146402	0.0433042	-3,380,778,909	0.000722807	0.0340609
AFUB_027280	2,228,297,613	-0.145498	0.0430204	-3,382,061,052	0.000719442	0.0340609
AFUB_051750	5,808,982,296	-0.141801	0.0418752	-3,386,270,564	0.000708495	0.0340609
AFUB_085880	5,518,661,191	0.178558	0.0527553	3,384,649,079	0.000712693	0.0340609
AFUB_014810	4,012,855,688	-0.218261	0.0646774	-3,374,603,701	0.000739221	0.0345684
AFUB_094630	4,770,639,972	0.241989	0.0717624	3,372,086,265	0.000746011	0.0346217
AFUB_094680	1,481,355,227	0.12607	0.0375971	3,353,187,419	0.000798866	0.0367959
AFUB_065640	8,667,433,074	-0.168931	0.0504318	-3,349,686,453	0.000809031	0.036986
AFUB_068340	2,505,319,535	0.16268	0.0486506	334,383,822	0.000826279	0.0374947
AFUB_018270	2,906,992,269	0.250472	0.0752335	3,329,265,589	0.000870753	0.0392223
AFUB_087850	9,063,264,685	-0.153326	0.0461217	-3,324,367,568	0.000886193	0.0396264
AFUB_004920	9,064,562,885	-0.175485	0.0529397	-3,314,812,727	0.000917045	0.0407088
AFUB_001370	6,349,726,999	-0.175004	0.0528508	-3,311,291,071	0.000928666	0.0409281
AFUB_058520	4,552,006,753	-0.35476	0.107598	-3,297,081,565	0.000976951	0.0423143
AFUB_076180	2,268,153,736	-0.113201	0.034366	-3,293,993,309	0.000987748	0.0423143
AFUB_085790	180,398,012	-0.116649	0.0353873	-3,296,351,411	0.000979494	0.0423143
AFUB_091030	5,493,965,666	0.104447	0.0316918	3,295,719,883	0.000981698	0.0423143
AFUB_036440	8,360,631,092	0.142421	0.0433147	3,288,044,925	0.00100886	0.0429185
AFUB_012940	7,026,556,495	0.138936	0.0423109	3,283,695,589	0.00102455	0.043281
AFUB_071880	8,411,666,368	0.177852	0.0541936	3,281,788,573	0.00103151	0.043281
AFUB_068360	2,052,731,966	0.123634	0.0376951	3,279,834,429	0.00103868	0.0432854
AFUB_019130	1,677,114,451	0.125456	0.0382878	327,666,818	0.0010504	0.0434779
AFUB_003170	1,110,353,341	-0.154484	0.0474233	-3,257,562,537	0.00112374	0.0460537
AFUB_011490	1,113,893,779	0.137802	0.0423149	325,657,257	0.00112766	0.0460537
AFUB_052540	3,553,966,418	-0.0951998	0.0292661	-3,252,908,329	0.0011423	0.0463427
AFUB_053080	4,198,406,629	-0.0918116	0.0282498	-3,249,993,109	0.00115408	0.0465124
AFUB_031000	3,770,352,412	-0.217733	0.0673635	-32,322,048	0.00122839	0.0491838
AFUB_020920	6,183,076,506	-0.0873282	0.027125	-3,219,472,835	0.00128426	0.0510871
AFUB_090330	3,198,086,695	-0.114002	0.0354341	-3,217,282,296	0.00129411	0.0511466
AFUB_016670	6,307,801,321	0.151076	0.0469861	321,534,299	0.00130289	0.0511634
AFUB_052280	9,651,162,436	-0.170552	0.0530775	-3,213,270,694	0.00131233	0.0512058
AFUB_021400	8,804,265,647	-0.147492	0.0459548	-3,209,499,149	0.00132966	0.0514937
AFUB_036130	5,957,696,997	-0.149389	0.0465935	-320,621,775	0.00134492	0.0514937
AFUB_050690	1,395,013,699	-0.134263	0.0418709	-3,206,580,832	0.00134323	0.0514937
AFUB_088670	2,169,102,555	-0.107961	0.0337156	-320,212,101	0.0013642	0.0519073
AFUB_049070	4,564,246,421	-0.13823	0.0432478	-3,196,241,749	0.0013923	0.0520324
AFUB_061430	816,294,026	0.160817	0.0503166	3,196,104,308	0.00139297	0.0520324
AFUB_070020	1,847,426,215	0.110706	0.0346053	3,199,093,165	0.00137861	0.0520324
AFUB_076680	1,040,753,032	-0.130134	0.0408214	-3,187,895,844	0.00143312	0.0532079
AFUB_008560	4,425,553,403	-0.122249	0.0383982	-3,183,703,027	0.00145404	0.0536594
AFUB_099180	9,748,747,603	-0.153557	0.0483583	-3,175,411,132	0.00149624	0.0548862
AFUB_061900	254,357,002	-0.230759	0.0727353	-3,172,590,831	0.00151085	0.0550922
AFUB_037590	4,433,978,146	-0.1175	0.0371432	-316,342,901	0.00155922	0.056288
AFUB_091340	7,734,993,512	0.151426	0.0478755	3,162,906,423	0.00156203	0.056288
AFUB_061660	3,097,896,838	0.146898	0.0464735	3,160,902,383	0.00157281	0.0563453
AFUB_002500	4,141,337,028	0.194067	0.0614578	3,157,731,029	0.00159002	0.0566307
AFUB_090240	1,571,975,055	-0.107012	0.0341303	-3,135,386,727	0.00171628	0.0607741
AFUB_059350	3,748,792,099	-0.170154	0.0543592	-3,130,175,885	0.00174702	0.0610196
AFUB_086930	4,337,578,632	-0.1116	0.0356645	-3,129,155,681	0.00175309	0.0610196
AFUB_101559	310,737,319	0.232634	0.0743292	3,129,778,239	0.00174938	0.0610196
AFUB_066580	1,064,597,457	0.180198	0.0576453	3,125,980,002	0.00177214	0.0613339
AFUB_006260	2,937,184,196	0.206961	0.0664583	3,114,147,535	0.00184477	0.0633982
AFUB_050000	8,573,197,283	0.149388	0.0479898	3,112,917,331	0.00185248	0.0633982
AFUB_004670	2,000,966,976	0.0944962	0.0304464	3,103,686,358	0.00191126	0.0650465
AFUB_061490	1,285,692,113	-0.163994	0.0529113	-3,099,418,024	0.00193901	0.0656265
AFUB_007960	1,039,586,061	-0.145307	0.0470211	-3,090,237,477	0.00199996	0.0673175
AFUB_012530	1,389,976,131	-0.118066	0.038335	-3,079,856,066	0.00207101	0.0693278
AFUB_088230	3,455,221,456	-0.193137	0.0629635	-306,743,869	0.00215902	0.0715952
AFUB_090610	470,665,411	-0.255446	0.0832882	-3,067,010,067	0.00216212	0.0715952
AFUB_039500	1,126,205,941	0.118047	0.0385686	3,060,704,639	0.00220817	0.0727271
AFUB_041480	830,506,005	0.133584	0.0437798	305,127,168	0.00227874	0.0746502
AFUB_004130	2,343,281,112	0.108846	0.0357717	3,042,802,223	0.00234386	0.076375
AFUB_033520	4,036,658,597	-0.198841	0.0655853	-3,031,799,901	0.002431	0.0787954
AFUB_007770	2,518,384,296	0.0753781	0.0249278	3,023,859,214	0.00249572	0.0804674
AFUB_000330	8,415,604,587	-0.169167	0.0560035	-3,020,655,902	0.00252228	0.0808978
AFUB_100390	8,524,235,076	-0.134244	0.0445439	-3,013,748,347	0.00258042	0.0823314
AFUB_039880	174,347,511	-0.099105	0.0329775	-3,005,227,934	0.00265382	0.0829454
AFUB_063890	8,396,922,951	0.0908991	0.030212	3,008,712,957	0.00262357	0.0829454
AFUB_087340	7,921,553,501	-0.184825	0.0614652	-3,006,988,878	0.00263849	0.0829454
AFUB_096630	4,279,503,776	-0.204858	0.068158	-3,005,632,418	0.00265029	0.0829454
AFUB_006180	8,694,048,683	0.100081	0.0334011	299,634,598	0.00273236	0.0836011
AFUB_008960	3,544,474,071,996	0.103169	0.0344446	2,995,218,584	0.00274248	0.0836011
AFUB_032110	7,088,964,143	-0.13354	0.0445862	-2,995,104,501	0.00274351	0.0836011
AFUB_041750	2,421,536,697	-0.204852	0.068332	-2,997,885,891	0.00271859	0.0836011
AFUB_044910	1,580,157,123	-0.116173	0.0387982	-2,994,280,603	0.00275093	0.0836011
AFUB_085890	3,112,076,232	0.177393	0.0592565	299,364,329	0.00275668	0.0836011
AFUB_060320	3,622,323,204	-0.185439	0.0620348	-2,989,272,816	0.00279642	0.0843886
AFUB_019820	4,630,368,863	-0.105881	0.0354711	-2,985,003,123	0.00283575	0.0849981
AFUB_034980	1,219,874,553	0.108319	0.036317	2,982,585,758	0.00285825	0.0849981
AFUB_091160	1,560,661,794	-0.122918	0.0411962	-2,983,718,772	0.00284768	0.0849981
AFUB_071490	3,398,464,235	-0.0878869	0.0295551	-2,973,660,048	0.00294271	0.0866684
AFUB_088360	2,354,810,538	-0.132273	0.0444674	-2,974,596,539	0.00293374	0.0866684
AFUB_006650	2,595,527,642	0.0893629	0.0301099	2,967,887,145	0.00299854	0.0875195
AFUB_021180	1,181,773,915	-0.109718	0.0369706	-2,967,719,751	0.00300018	0.0875195
AFUB_013250	7,622,864,666	0.147104	0.0498362	2,951,751,281	0.00315977	0.0885546
AFUB_017750	5,071,792,817	0.154389	0.0521982	2,957,752,543	0.00309891	0.0885546
AFUB_024080	2,260,647,442	0.113303	0.0383927	2,951,166,666	0.00316576	0.0885546
AFUB_030400	1,151,089,826	-0.165842	0.0561015	-2,956,109,411	0.00311547	0.0885546
AFUB_037960	2,748,536,677	-0.19064	0.0644663	-2,957,208,212	0.00310438	0.0885546
AFUB_069450	860,166,708	-0.135961	0.0460523	-2,952,309,675	0.00315406	0.0885546
AFUB_085900	3,560,429,762	0.170526	0.057717	295,452,471	0.00313151	0.0885546
AFUB_087660	7,250,970,148	0.167284	0.0566162	2,954,704,997	0.00312968	0.0885546
AFUB_098220	5,016,780,057	-0.0806975	0.0272939	-2,956,612,541	0.00311039	0.0885546
AFUB_034310	1,010,647,198	-0.140897	0.0478284	-2,945,886,999	0.0032203	0.0896707
AFUB_012720	6,977,038,116	0.137011	0.0465757	2,941,697,298	0.00326419	0.0904815
AFUB_004630	5,305,632,829	0.142109	0.0485599	2,926,472,871	0.00342829	0.0934315
AFUB_030140	3,647,071,745	-0.136962	0.0468278	-2,924,791,822	0.00344687	0.0934315
AFUB_054540	3,224,025,972	-0.178459	0.0609482	-2,928,041,209	0.00341105	0.0934315
AFUB_085680	1,325,331,581	-0.133982	0.0457411	-2,929,139,939	0.00339901	0.0934315
AFUB_091040	8,121,957,587	-0.139275	0.0476094	-2,925,359,564	0.00344058	0.0934315
AFUB_068120	2,991,352,353	0.0890874	0.0305134	2,919,617,068	0.00350462	0.0940148
AFUB_085620	1,542,623,568	0.099409	0.0340588	2,918,745,805	0.00351443	0.0940148
AFUB_092570	3,317,089,399	-0.0842727	0.0288686	-2,919,187,612	0.00350945	0.0940148
AFUB_016080	3,210,610,541	0.197429	0.067763	2,913,517,093	0.00357382	0.0944611
AFUB_034820	1,560,851,595	0.111772	0.0383821	2,912,098,888	0.00359009	0.0944611
AFUB_038070	3,053,020,697	-0.0863313	0.0296481	-2,911,863,946	0.00359279	0.0944611
AFUB_093960	7,642,899,628	0.124897	0.0428575	29,142,331	0.00356564	0.0944611
AFUB_044840	1,476,234,968	0.113028	0.0388777	2,907,277,816	0.00364589	0.0946387
AFUB_076440	1,199,127,365	-0.131577	0.0452194	-2,909,736,914	0.00361733	0.0946387
AFUB_092790	72,631,429	0.156359	0.0537717	2,907,825,299	0.00363952	0.0946387
AFUB_066440	3,396,067,769	-0.285616	0.0983692	-2,903,510,554	0.00369004	0.0953807
AFUB_059670	6,556,118,866	0.140284	0.0483519	2,901,317,648	0.00371597	0.0956472
AFUB_037510	2,618,516,862	0.115617	0.0399229	289,601,272	0.00377937	0.0962962
AFUB_081960	35,760,484,009,837	0.0653817	0.022568	2,897,096,962	0.00376633	0.0962962
AFUB_095870	3,024,412,894	0.097199	0.0335717	2,895,268,461	0.00378834	0.0962962
AFUB_017810	17,126,114	0.101902	0.0352804	2,888,354,739	0.00387263	0.0980319
AFUB_071280	4,323,485,736	0.184055	0.0637661	2,886,406,675	0.00389668	0.0982349
AFUB_076770	5,287,887,917	0.149752	0.0519443	2,882,934,121	0.0039399	0.0989173
AFUB_084410	1,220,591,423	0.121038	0.042039	2,879,182,836	0.00398707	0.099548
AFUB_097510	1,695,836,339	0.108055	0.0375405	2,878,357,415	0.00399752	0.099548
AFUB_095240	2,033,864,786	0.166662	0.0580213	2,872,423,754	0.00407336	0.101026
AFUB_027530	1,382,873,987	0.117149	0.0409569	2,860,298,274	0.00423243	0.104492
AFUB_052350	5,745,585,295	-0.158785	0.0555349	-2,859,192,646	0.00424721	0.104492
AFUB_009400	4,020,014,624	0.160095	0.0561565	2,850,868,504	0.00436	0.105571
AFUB_020900	4,222,479,415	0.0946677	0.0331806	2,853,103,115	0.00432946	0.105571
AFUB_041890	2,733,033,551	-0.112599	0.0394462	-2,854,504,141	0.00431041	0.105571
AFUB_091670	1,117,883,138	-0.102386	0.0359077	-2,851,361,037	0.00435325	0.105571
AFUB_021260	1,305,094,928	-0.0989522	0.0347271	-2,849,422,444	0.00437987	0.10562
AFUB_061240	4,285,861,392	0.15214	0.053416	2,848,216,335	0.0043965	0.10562
AFUB_015070	557,866,975	-0.168968	0.0593985	-2,844,654,783	0.00444596	0.105976
AFUB_050540	1,021,184,226	-0.123955	0.0435608	-2,845,557,684	0.00443337	0.105976
AFUB_050850	7,462,013,096	-0.168236	0.0592053	-2,841,575,393	0.00448912	0.106179
AFUB_064170	3,274,421,967	-0.087521	0.0307953	-2,842,024,354	0.00448281	0.106179
AFUB_027410	100,625,448	-0.125675	0.0443965	-2,830,747,148	0.00464394	0.109418
AFUB_083850	1,215,539,958	-0.102626	0.0362785	-2,828,827,528	0.00467189	0.109655
AFUB_009490	818,429,089	-0.125789	0.0445134	-2,825,870,639	0.00471523	0.110105
AFUB_056820	7,997,702,971	-0.116596	0.041272	-2,825,073,183	0.00472698	0.110105
AFUB_025100	5,268,100,825	-0.103165	0.0365666	-2,821,296,867	0.00478299	0.110987
AFUB_028080	8,695,042,084	0.116401	0.0413159	2,817,346,031	0.00484223	0.111938
AFUB_006350	6,240,934,172	0.128915	0.0458436	2,812,052,277	0.00492265	0.113279
AFUB_070730	187,747,666	0.111932	0.039818	2,811,101,927	0.00493721	0.113279
AFUB_081940	5,616,765,395	0.112692	0.0401367	2,807,711,951	0.00498948	0.113627
AFUB_096440	2,722,516,789	0.0929829	0.0331079	2,808,481,802	0.00497757	0.113627
AFUB_088590	7,618,071,165	-0.0803438	0.0286737	-2,802,005,083	0.00507861	0.115228
AFUB_087580	861,186,973	0.114529	0.0408979	2,800,371,497	0.00510438	0.115385
AFUB_098170	200,752,379	0.111612	0.0399646	2,792,780,107	0.00522572	0.117694
AFUB_003490	1,591,336,112	0.10151	0.0363792	2,790,330,959	0.00526542	0.117765
AFUB_031610	3,758,643,294	-0.121856	0.0436809	-2,789,684,773	0.00527594	0.117765
AFUB_051500	3,753,301,992	-0.150297	0.0539114	-278,785,917	0.00530576	0.117765
AFUB_097520	6,433,256,793	0.121786	0.0436719	2,788,654,527	0.00529275	0.117765
AFUB_007800	100,792,057	-0.0862726	0.0310059	-2,782,452,942	0.00539497	0.11841
AFUB_057540	2,406,467,357	0.0846763	0.0304236	2,783,248,994	0.00538175	0.11841
AFUB_081229	3,826,242,343	0.155994	0.0560843	2,781,421,921	0.00541214	0.11841
AFUB_096520	8,941,997,097	-0.109233	0.0392254	-2,784,744,394	0.00535699	0.11841
AFUB_084660	1,207,311,403	0.102402	0.036909	2,774,458,257	0.00552937	0.120544
AFUB_020890	1,674,387,412	-0.123491	0.044544	-2,772,345,581	0.00556539	0.120899
AFUB_059700	1,337,451,625	-0.149844	0.0541172	-2,768,887,268	0.00562481	0.121758
AFUB_000250	1,236,139,977	0.118893	0.0429883	2,765,706,916	0.00567996	0.122089
AFUB_088870	332,252,433	-0.178006	0.0643352	-276,684,878	0.0056601	0.122089
AFUB_063660	5,784,352,123	0.159027	0.0575296	2,764,271,236	0.00570501	0.122199
AFUB_017820	1,263,513,253	0.111689	0.0405075	2,757,232,751	0.00582928	0.123994
AFUB_067500	6,236,261,813	0.148166	0.0537277	2,757,718,703	0.00582063	0.123994
AFUB_102050	9,676,018,506	0.136144	0.0494507	2,753,117,072	0.00590308	0.125129
AFUB_003530	6,827,600,333	0.122848	0.0448906	2,736,603,829	0.0062077	0.131132
AFUB_063040	476,741,114	-0.140252	0.0513203	-273,288,085	0.0062783	0.132168
AFUB_016530	2,401,755,888	0.0967155	0.0354302	2,729,746,101	0.00633831	0.132974
AFUB_004090	1,419,800,977	0.0995123	0.0365129	2,725,400,323	0.00642236	0.133981
AFUB_092960	1,604,030,447	-0.0840915	0.0308719	-272,388,338	0.00645193	0.133981
AFUB_097790	3,247,891,506	0.167196	0.0613705	2,724,374,606	0.00644234	0.133981
AFUB_053020	5,364,227,037	-0.0768046	0.028219	-2,721,738,311	0.00649395	0.134399
AFUB_059570	3,040,335,973	-0.119556	0.0439503	-2,720,252,442	0.00652321	0.134549
AFUB_042750	1,362,954,597	-0.110323	0.0406182	-2,716,103,484	0.00660553	0.135635
AFUB_098570	1,036,678,062	0.109914	0.0404783	2,715,372,156	0.00662013	0.135635
AFUB_010960	5,784,801,219	-0.0813514	0.0300088	-2,710,917,987	0.00670972	0.137013
AFUB_063700	1,014,789,693	-0.0753132	0.0278154	-2,707,605,571	0.00677705	0.137582
AFUB_096460	2,367,576,529	0.191207	0.0706253	2,707,337,203	0.00678253	0.137582
AFUB_039420	1,158,079,475	-0.0992786	0.0367322	-270,276,398	0.00687656	0.139029
AFUB_015080	1,145,149,472	-0.124857	0.0462312	-2,700,708,293	0.0069192	0.139431
AFUB_067410	2,212,657,701	-0.193427	0.0717037	-2,697,580,268	0.00698454	0.140286
AFUB_063330	5,655,326,722	0.126941	0.0471312	2,693,354,078	0.00707371	0.140693
AFUB_084880	1,015,594,669	0.114353	0.0424494	2,693,865,097	0.00706287	0.140693
AFUB_085280	134,036,293	-0.105439	0.0391282	-2,694,709,105	0.00704501	0.140693
AFUB_024990	2,816,707,181	0.198401	0.0737707	2,689,422,346	0.00715758	0.141135
AFUB_039810	308,803,862	-0.105739	0.0392905	-2,691,216,236	0.0071192	0.141135
AFUB_077110	5,260,386,273	-0.151088	0.056186	-2,689,074,785	0.00716504	0.141135
AFUB_090910	1,533,139,985	-0.135518	0.0504843	-2,684,366,807	0.00726673	0.14268
AFUB_007870	4,088,027,348	-0.19044	0.0710178	-2,681,580,607	0.00732753	0.142698
AFUB_014390	1,178,369,139	0.107454	0.0401526	2,676,131,038	0.00744775	0.142698
AFUB_024920	5,016,935,594	0.111791	0.0417364	2,678,510,266	0.00739505	0.142698
AFUB_027110	4,556,334,914	-0.177183	0.0661286	-267,937,093	0.00737606	0.142698
AFUB_067000	1,468,651,449	-0.104899	0.039202	-2,675,848,488	0.00745403	0.142698
AFUB_084020	2,315,128,109	0.103981	0.0388417	2,677,046,181	0.00742744	0.142698
AFUB_096220	1,462,063,035	-0.146339	0.0546742	-267,655,601	0.00743831	0.142698
AFUB_099370	2,141,614,843	-0.100428	0.0374691	-2,680,288,123	0.00735588	0.142698
AFUB_002260	5,274,364,847	0.139148	0.0521678	2,667,325,915	0.00764575	0.145912
AFUB_012290	7,018,810,497	-0.118031	0.0442893	-2,664,993,684	0.00769898	0.146472
AFUB_036900	1,479,924,703	-0.106762	0.0400897	-2,663,083,207	0.00774283	0.14685
AFUB_085670	3,474,491,403	-0.191326	0.0719096	-2,660,640,644	0.00779921	0.147387
AFUB_100200	29,595,157	0.168189	0.0632342	2,659,776,087	0.00781926	0.147387
AFUB_018220	7,356,972,922	0.1264	0.0475464	2,658,464,608	0.00784976	0.147508
AFUB_018110	3,470,485,327	-0.159788	0.060137	-2,657,064,089	0.00788245	0.147669
AFUB_048070	8,083,355,749	-0.182715	0.0688045	-2,655,566,731	0.00791753	0.147842
AFUB_064350	1,123,315,435	-0.10651	0.0401225	-2,654,614,101	0.00793992	0.147842
AFUB_021470	7,588,531,616	-0.139044	0.0524419	-2,651,398,761	0.00801591	0.148805
AFUB_047580	7,105,085,668	0.0761778	0.0287697	2,647,842,809	0.00810072	0.149924
AFUB_014100	8,506,907,988	-0.120771	0.0457763	-2,638,294,812	0.00833241	0.153748
AFUB_071710	3,068,030,906	0.163139	0.0618915	263,588,449	0.00839183	0.154379
AFUB_038240	2,014,027,795	-0.0809669	0.0308444	-2,625,014,194	0.00866454	0.156778
AFUB_044820	5,454,984,948	0.161675	0.0615175	2,628,120,762	0.0085858	0.156778
AFUB_051580	8,050,090,325	0.114151	0.0434932	2,624,573,599	0.00867575	0.156778
AFUB_074420	2,738,983,141	-0.263057	0.100185	-262,570,406	0.008647	0.156778
AFUB_076420	3,608,913,893	0.0777781	0.0295832	2,629,129,275	0.00856038	0.156778
AFUB_093180	789,874,472	-0.107429	0.0409159	-2,625,595,464	0.00864976	0.156778
AFUB_100230	623,330,092	0.0672598	0.0256554	2,621,658,899	0.0087503	0.15766
AFUB_028939	7,349,736,986	-0.116184	0.0444064	-2,616,383,281	0.00888667	0.159647
AFUB_066430	2,603,608,819	-0.203543	0.0778359	-2,615,030,469	0.00892195	0.159812
AFUB_067250	3,068,165,953	-0.25051	0.0960022	-2,609,421,653	0.00906954	0.161983
AFUB_023210	2,761,108,249	-0.170073	0.0652782	-2,605,362,409	0.00917771	0.163438
AFUB_005810	3,340,021,693	-0.0939312	0.0361079	-2,601,399,583	0.00928442	0.163909
AFUB_045300	6,181,370,945	-0.122433	0.0470593	-260,167,812	0.00927689	0.163909
AFUB_051440	3,714,952,101	-0.109819	0.042209	-2,601,799,318	0.00927361	0.163909
AFUB_101990	2,967,122,467	0.182231	0.0702779	2,593,004,929	0.00951414	0.167482
AFUB_018340	711,032,679	0.133606	0.051593	2,589,608,629	0.00960851	0.168364
AFUB_087170	2,038,014,263	0.0960518	0.0370967	2,589,225,381	0.00961921	0.168364
AFUB_069670	7,200,086,031	0.113327	0.0438103	2,586,776,161	0.00968785	0.169082
AFUB_091720	1,447,559,585	-0.13062	0.0505943	-2,581,702,231	0.00983144	0.171101
AFUB_020270	7,039,306,566	-0.119638	0.046391	-2,578,905,015	0.0099114	0.172004
AFUB_068290	8,264,431,166	0.108802	0.0422277	25,765,504	0.00997917	0.17269
AFUB_028690	632,476,148	0.129695	0.0504996	256,823,743	0.0102217	0.176389
AFUB_006080	9,197,306,354	0.155728	0.0606657	2,566,980,811	0.0102588	0.176443
AFUB_038250	222,255,682	0.184481	0.0718893	2,566,184,271	0.0102824	0.176443
AFUB_088680	6,754,591,555	-0.112393	0.0439016	-2,560,120,048	0.0104636	0.17905
AFUB_000660	1,303,806,409	0.108747	0.0425434	2,556,148,829	0.0105838	0.180507
AFUB_034560	4,377,289,856	0.080085	0.03134	255,536,386	0.0106077	0.180507
AFUB_075050	1,437,604,627	-0.0839246	0.0328605	-2,553,967,014	0.0106503	0.180731
AFUB_003790	4,056,712,506	0.148625	0.0583931	2,545,252,408	0.0109199	0.184596
AFUB_055260	3,421,773,299	0.102287	0.0401968	2,544,662,343	0.0109383	0.184596
AFUB_028040	3,575,142,959	0.144245	0.05676	2,541,310,391	0.0110438	0.185863
AFUB_026360	1,597,364,919	0.097599	0.0384287	2,539,740,486	0.0110935	0.186188
AFUB_074250	4,773,215,097	-0.207275	0.0816843	-2,537,513,343	0.0111643	0.186865
AFUB_082450	2,378,040,283	-0.17408	0.0689196	-2,525,839,683	0.0115422	0.192664
AFUB_034620	1,840,621,771	0.0895639	0.0355323	2,520,631,818	0.0117144	0.194479
AFUB_038550	1,202,387,741,627	0.103145	0.0409068	2,521,471,352	0.0116865	0.194479
AFUB_022590	2,277,842,715	-0.173462	0.0688586	-2,519,110,642	0.0117652	0.194793
AFUB_016160	4,831,502,635	-0.130998	0.0520992	-2,514,393,344	0.0119237	0.195307
AFUB_061200	4,164,458,547	-0.137627	0.0547098	-2,515,590,184	0.0118833	0.195307
AFUB_063880	1,303,546,958	0.0709562	0.0282095	2,515,330,379	0.0118921	0.195307
AFUB_094030	1,309,638,336	0.116029	0.0461263	2,515,466,193	0.0118875	0.195307
AFUB_027640	1,034,121,065	0.0974008	0.0388016	2,510,224,637	0.0120654	0.197101
AFUB_014780	3,945,462,556	0.137598	0.0548402	2,509,066,977	0.0121051	0.197222
AFUB_000380	2,149,289,092	0.0875882	0.034934	2,507,244,839	0.0121676	0.197486
AFUB_023610	5,748,788,201	-0.129048	0.0514809	-2,506,720,552	0.0121857	0.197486
AFUB_014690	2,199,461,778	0.102994	0.0412239	2,498,396,289	0.0124757	0.201574
AFUB_082790	26,953,609	0.168364	0.0674353	2,496,666,988	0.0125367	0.201574
AFUB_094370	4,294,710,773	-0.141673	0.0567329	-2,497,199,494	0.0125179	0.201574
AFUB_025970	1,364,492,486	-0.0931185	0.0373448	-2,493,477,346	0.0126499	0.202861
AFUB_039410	1,207,423,019	-0.107197	0.0430304	-2,491,189,157	0.0127316	0.203511
AFUB_065910	6,887,886,523	-0.131196	0.052679	-2,490,486,535	0.0127568	0.203511
AFUB_057720	7,866,248,264	0.111504	0.0447974	2,489,079,855	0.0128074	0.203561
AFUB_096490	2,595,224,103	-0.16896	0.067895	-2,488,553,041	0.0128264	0.203561
AFUB_031930	5,662,640,552	-0.1255	0.050624	-247,905,452	0.0131731	0.208523
AFUB_082890	5,115,987,246	-0.0819983	0.0330893	-247,808,993	0.0132088	0.208549
AFUB_006300	6,022,934,551	0.10919	0.0441157	2,475,087,677	0.0133203	0.208697
AFUB_039980	1,701,378,738	-0.0867048	0.0350075	-2,476,752,071	0.0132584	0.208697
AFUB_067970	1,313,175,023	-0.149158	0.0602428	-2,475,948,595	0.0132883	0.208697
AFUB_039180	3,244,808,119	-0.0870534	0.035276	-2,467,777,874	0.0135955	0.210318
AFUB_057000	2,486,504,537	-0.238216	0.0964717	-2,469,283,211	0.0135384	0.210318
AFUB_063080	5,162,317,191	-0.0769124	0.0311574	-2,468,513,937	0.0135675	0.210318
AFUB_069480	6,805,922,213	-0.120454	0.0488024	-2,468,191,786	0.0135798	0.210318
AFUB_098010	3,710,803,135	0.16042	0.0649112	2,471,382,994	0.0134592	0.210318
AFUB_012840	8,323,002,719	0.0927882	0.0376671	246,337,633	0.0137635	0.210807
AFUB_019450	5,388,826,508	0.124004	0.0503365	2,463,510,607	0.0137584	0.210807
AFUB_053780	2,401,380,768	-0.0787845	0.0319827	-2,463,344,972	0.0137647	0.210807
AFUB_099450	123,699,467	-0.087292	0.0354049	-2,465,536,575	0.0136808	0.210807
AFUB_010340	6,012,107,042	-0.121067	0.0492082	-2,460,298,921	0.0138821	0.212075
AFUB_021090	9,304,588,158	0.107553	0.0437593	245,782,582	0.0139781	0.213009
AFUB_084700	9,385,925,062	0.100271	0.0408759	2,453,070,014	0.0141643	0.215311
AFUB_032450	3,622,883,666	0.137885	0.0562451	2,451,509,796	0.0142258	0.215711
AFUB_029760	3,725,296,277	-0.1856	0.0757852	-2,449,027,601	0.0143242	0.216668
AFUB_078240	2,245,953,943	0.0840388	0.0343462	2,446,815,366	0.0144125	0.217465
AFUB_041390	2,972,189,738	-0.112883	0.0462216	-2,442,218,098	0.0145973	0.219713
AFUB_094940	3,526,885,169	-0.1433	0.0587333	-2,439,844,175	0.0146936	0.220231
AFUB_101330	2,732,200,991	0.122194	0.0500877	2,439,597,342	0.0147036	0.220231
AFUB_023320	1,000,177,724	0.108313	0.0444208	2,438,348,202	0.0147546	0.220455
AFUB_042690	2,128,682,518	0.0874042	0.035928	2,432,755,283	0.0149844	0.222802
AFUB_064920	274,148,964	0.1668	0.0685512	2,433,220,947	0.0149652	0.222802
AFUB_059780	1,380,737,709	-0.0883161	0.0363205	-243,157,638	0.0150333	0.222988
AFUB_061100	1,165,322,318	0.0875749	0.0360393	242,998,231	0.0150996	0.22343
AFUB_003310	306,005,885	0.155375	0.0641742	2,421,144,001	0.0154717	0.226731
AFUB_005670	1,162,090,966	0.0916297	0.0378724	2,419,433,455	0.0155447	0.226731
AFUB_034990	19,765,874	0.0789913	0.0326443	2,419,754,012	0.015531	0.226731
AFUB_055020	2,308,834,721	-0.172707	0.0713119	-2,421,857,783	0.0154414	0.226731
AFUB_057960	1,909,544,738	0.0796042	0.0328983	2,419,707,696	0.015533	0.226731
AFUB_094530	1,394,823,088	0.0908889	0.0375558	2,420,105,193	0.015516	0.226731
AFUB_078780	4,248,671,232	-0.138842	0.0574913	-241,500,352	0.0157351	0.228962
AFUB_026700	6,597,546,445	0.144898	0.0601398	2,409,351,446	0.0159809	0.231988
AFUB_087310	4,211,569,396	0.134025	0.055709	2,405,810,731	0.0161366	0.233695
AFUB_010610	2,117,147,452	0.11326	0.0471475	2,402,259,087	0.0162942	0.23542
AFUB_099190	8,824,307,344	-0.111986	0.0466354	-2,401,313,451	0.0163363	0.235474
AFUB_047500	431,546,424	0.0656423	0.0273911	2,396,484,078	0.0165532	0.23779
AFUB_101340	3,949,634,645	0.175122	0.0730888	2,396,009,318	0.0165747	0.23779
AFUB_073380	9,885,175,721	-0.0945862	0.0394935	-2,394,984,853	0.0166211	0.237899
AFUB_068550	2,298,097,888	0.0701975	0.0293212	2,394,087,525	0.0166618	0.237925
AFUB_020290	1,172,964,128	0.0938694	0.0392454	2,391,860,548	0.0167632	0.238817
AFUB_008710	1,635,754,253	0.0820345	0.0343425	2,388,715,871	0.0169074	0.239405
AFUB_016580	363,785,339	0.158424	0.0663354	2,388,227,337	0.0169299	0.239405
AFUB_018700	2,771,875,345	0.159369	0.0666818	2,389,992,293	0.0168487	0.239405
AFUB_021620	1,855,956,067	0.12137	0.0508344	2,387,556,641	0.0169608	0.239405
AFUB_015030	1,288,655,191	-0.101383	0.0424883	-2,386,140,254	0.0170263	0.239777
AFUB_022450	7,948,228,151	-0.110402	0.0463306	-2,382,910,473	0.0171764	0.241336
AFUB_001320	3,864,046,772	0.13106	0.0550482	2,380,817,304	0.0172743	0.242156
AFUB_067330	5,507,574,331	0.121507	0.0510608	2,379,656,559	0.0173288	0.242366
AFUB_095950	9,835,274,229	-0.0932369	0.0392401	-2,376,058,968	0.0174987	0.244184
AFUB_054220	2,467,304,698	0.0820247	0.0345491	2,374,149,208	0.0175894	0.244893
AFUB_020500	1,199,881,051	-0.102116	0.0430602	-2,371,473,502	0.0177173	0.245557
AFUB_053100	1,073,044,534	0.0945076	0.0398473	2,371,741,217	0.0177045	0.245557
AFUB_021820	6,350,288,856	-0.110847	0.0467943	-2,368,816,227	0.0178451	0.246299
AFUB_051390	269,408,266	0.0776152	0.0327672	2,368,689,248	0.0178512	0.246299
AFUB_040960	1,421,983,361,169	0.0812317	0.0343286	2,366,295,524	0.0179671	0.246786
AFUB_094280	2,614,242,842	0.156928	0.0663096	2,366,592,752	0.0179527	0.246786
AFUB_022250	2,189,221,765	0.0898784	0.038032	2,363,233,304	0.0181163	0.246897
AFUB_032820	351,672,672	-0.222536	0.0942151	-2,361,998,003	0.0181767	0.246897
AFUB_044800	1,484,625,008	0.0656321	0.0277849	2,362,154,691	0.0181691	0.246897
AFUB_046520	7,747,645,936	-0.0978936	0.0414316	-2,362,776,258	0.0181386	0.246897
AFUB_067890	4,406,853,343	0.127906	0.0541389	2,362,555,461	0.0181494	0.246897
AFUB_022750	3,218,746,038	0.138797	0.0588231	2,359,569,337	0.0182962	0.24797
AFUB_078330	473,821,242	0.122299	0.0519146	235,577,746	0.018484	0.249962
AFUB_001770	874,180,697	-0.10586	0.0449775	-2,353,618,643	0.0185917	0.250516
AFUB_021100	2,615,081,939	0.167751	0.0712829	2,353,317,371	0.0186067	0.250516
AFUB_088860	2,484,353,723	-0.166418	0.0707851	-2,351,034,284	0.0187213	0.251506
AFUB_030450	2,169,194,105	0.0769483	0.0327733	2,347,891,585	0.01888	0.252711
AFUB_082340	2,257,293,875	-0.0918013	0.0391039	-2,347,624,888	0.0188935	0.252711
AFUB_047770	2,789,840,837	0.0900869	0.0385039	2,339,679,625	0.0193003	0.257264
AFUB_086800	1,249,467,822	-0.100563	0.0429876	-2,339,338,386	0.0193179	0.257264
AFUB_058230	2,055,451,701	0.0875162	0.0374622	2,336,120,023	0.019485	0.258926
AFUB_020700	8,897,545,349	-0.0799261	0.0342432	-2,334,069,302	0.0195921	0.259786
AFUB_037830	3,340,741,004	-0.0738613	0.0316772	-2,331,682,477	0.0197174	0.260883
AFUB_002920	1,291,647,332	0.0924897	0.0397216	2,328,449,306	0.0198883	0.26089
AFUB_031740	4,673,132,745	0.128005	0.0549583	2,329,132,309	0.0198521	0.26089
AFUB_052780	2,488,917,247	-0.170912	0.0733967	-2,328,613,332	0.0198796	0.26089
AFUB_078790	1,834,909,775	0.0837741	0.0359597	2,329,667,415	0.0198237	0.26089
AFUB_068140	6,630,330,276	-0.132688	0.0570182	-2,327,115,559	0.0199591	0.26126
AFUB_009550	6,283,280,654	-0.111984	0.0482332	-2,321,722,928	0.0202479	0.264474
AFUB_074700	4,214,158,822	0.131282	0.056573	2,320,571,812	0.02031	0.264721
AFUB_062320	3,467,316,421	0.105897	0.045684	2,318,024,913	0.020448	0.26539
AFUB_069660	6,162,789,588	0.0649912	0.0280311	2,318,533,877	0.0204203	0.26539
AFUB_020040	4,321,704,268	0.140928	0.0608547	2,315,812,538	0.0205685	0.26639
AFUB_005510	2,528,608,093	-0.167033	0.072153	-2,314,985,587	0.0206137	0.266413
AFUB_074550	2,556,118,328	-0.189961	0.0821282	-2,312,979,002	0.0207238	0.267271
AFUB_077470	44,507,985	-0.11894	0.0515796	-2,305,956,286	0.0211131	0.27172
AFUB_028730	3,462,270,855	0.133427	0.0578981	2,304,512,208	0.0211939	0.272188
AFUB_011810	1,725,964,742	0.0850869	0.0369583	2,302,242,532	0.0213215	0.273254
AFUB_047260	1,316,325,538	-0.11086	0.0481923	-2,300,376,842	0.0214269	0.274031
AFUB_025200	26,785,815,809,917	0.0951978	0.0414047	2,299,199,776	0.0214936	0.274168
AFUB_098730	1,210,633,753	0.081673	0.0355315	22,986,104	0.0215271	0.274168
AFUB_028110	4,887,898,482	0.135777	0.0591288	2,296,290,586	0.0216593	0.275279
AFUB_068730	9,367,884,834	-0.0986549	0.043072	-2,290,466,708	0.0219943	0.277808
AFUB_087360	3,896,166,719	-0.0727047	0.0317245	-2,291,749,467	0.0219201	0.277808
AFUB_098560	3,771,780,124	-0.124057	0.0541587	-2,290,625,689	0.0219851	0.277808
AFUB_074910	2,447,144,595	-0.163807	0.0715482	-2,289,465,605	0.0220523	0.277968
AFUB_055760	3,608,878,268	-0.0984201	0.0430187	-2,287,843,495	0.0221466	0.278025
AFUB_067200	6,153,744,091	0.161453	0.0705706	2,287,827,375	0.0221476	0.278025
AFUB_021680	8,061,058,019	0.0933795	0.0408673	228,494,542	0.022316	0.279566
AFUB_025860	3,283,805,906	-0.347124	0.152055	-2,282,890,103	0.0224368	0.280506
AFUB_024750	6,830,696,171	-0.117346	0.0514591	-2,280,383,473	0.022585	0.281783
AFUB_031140	1,444,746,192	0.0929226	0.0407728	2,279,035,754	0.0226649	0.282206
AFUB_068330	7,146,551,423	0.106516	0.0468103	2,275,490,491	0.0228765	0.284263
AFUB_026270	4,233,231,279	-0.167833	0.0738387	-2,272,975,154	0.0230277	0.285562
AFUB_030270	1,760,649,684	-0.0971409	0.0427656	-2,271,475,224	0.0231182	0.286106
AFUB_098830	4,460,208,428	0.0732242	0.0322665	2,269,359,519	0.0232465	0.287113
AFUB_060220	2,881,926,514	0.140058	0.0617487	2,268,192,929	0.0233174	0.28741
AFUB_011110	3,374,087,387	-0.150747	0.0665129	-226,643,545	0.0234247	0.288152
AFUB_028630	1,999,954,883	0.0877408	0.0388431	2,258,848,224	0.0238928	0.292735
AFUB_093810	2,501,567,863	0.157252	0.0695935	2,259,583,707	0.0238471	0.292735
AFUB_013100	1,230,124,254,538	0.0875126	0.038761	2,257,747,399	0.0239614	0.292989
AFUB_036150	4,794,820,187	-0.131424	0.0582731	-2,255,314,796	0.0241136	0.293677
AFUB_046830	1,009,685,678	0.0904466	0.0401016	2,255,439,329	0.0241058	0.293677
AFUB_000490	5,036,859,419	-0.126241	0.0561118	-2,249,808,411	0.0244611	0.294817
AFUB_003290	1,230,025,032	0.0793559	0.0352932	2,248,471,983	0.0245461	0.294817
AFUB_007740	1,524,513,757	-0.100915	0.0449034	-224,736,876	0.0246165	0.294817
AFUB_014890	5,364,286,641	-0.135682	0.0602824	-2,250,778,596	0.0243996	0.294817
AFUB_038080	7,134,485,139	-0.111198	0.0493581	-2,252,879,552	0.0242667	0.294817
AFUB_056530	108,802,868	-0.0823983	0.0366614	-2,247,551,108	0.0246048	0.294817
AFUB_059100	7,023,225,996	-0.0706675	0.031439	-2,247,762,797	0.0245913	0.294817
AFUB_067860	1,690,309,497	-0.0778996	0.0346683	-2,246,996,628	0.0246402	0.294817
AFUB_082150	4,625,840,715	0.158673	0.0704694	2,251,664,675	0.0243435	0.294817
AFUB_072060	2,211,633,046	-0.211338	0.0940887	-2,246,155,594	0.024694	0.294884
AFUB_009440	3,018,085,024	-0.0884346	0.0394637	-224,090,847	0.025032	0.298339
AFUB_049380	2,608,534,447	0.153551	0.0686561	2,236,527,996	0.0253172	0.301152
AFUB_043640	2,136,243,349	-0.0471625	0.0210997	-2,235,221,233	0.0254028	0.301585
AFUB_012020	9,662,187,937	0.0972895	0.0435486	2,234,045,768	0.0254801	0.301917
AFUB_013710	224,171,228	0.153714	0.06885	2,232,593,218	0.0255758	0.302466
AFUB_013170	3,897,271,576	0.131469	0.0589074	2,231,794,949	0.0256285	0.302505
AFUB_014610	1,025,017,548	0.0881659	0.0395244	223,066,721	0.0257032	0.302803
AFUB_034100	9,651,954,308	0.106429	0.0477323	2,229,714,538	0.0257664	0.302965
AFUB_020060	2,298,034,476	0.0686818	0.0308173	2,228,675,756	0.0258355	0.303196
AFUB_036170	4,075,051,141	0.126604	0.0568629	2,226,480,937	0.025982	0.303989
AFUB_043770	3,410,785,344	-0.0742667	0.0333607	-222,617,683	0.0260023	0.303989
AFUB_030240	617,650,051	0.0701149	0.0315176	2,224,628,607	0.0261062	0.304043
AFUB_061300	4,124,299,346	-0.0798416	0.035881	-2,225,177,469	0.0260693	0.304043
AFUB_023990	1,791,327,917	-0.0573506	0.0258908	-2,215,093,305	0.0267537	0.310992
AFUB_060040	122,891,226	0.0880817	0.0397886	2,213,739,843	0.0268467	0.311483
AFUB_096430	1,022,005,262	0.0981505	0.0443568	2,212,750,484	0.0269149	0.311683
AFUB_029980	4,789,491,454	0.121072	0.0547502	2,211,358,314	0.027011	0.312207
AFUB_032540	8,772,165,821	-0.0959375	0.0434782	-2,206,567,836	0.0273443	0.315005
AFUB_087590	1,149,069,479	0.112322	0.0509075	220,640,052	0.027356	0.315005
AFUB_014170	1,085,677,722	-0.0999779	0.0453514	-2,204,517,268	0.027488	0.315931
AFUB_077650	1,912,799,546	0.0864286	0.0392233	2,203,504,528	0.0275592	0.316157
AFUB_050380	9,056,378,661	-0.0912954	0.0414673	-2,201,624,241	0.0276919	0.316422
AFUB_050440	7,673,750,732	0.116862	0.0530613	2,202,401,716	0.0276369	0.316422
AFUB_070600	2,003,937,071	-0.0802054	0.0364407	-2,200,982,422	0.0277373	0.316422
AFUB_082010	4,204,661,741	0.117653	0.0535502	2,197,051,276	0.0280168	0.319016
AFUB_016460	5,694,074,585	0.121123	0.0551886	2,194,717,317	0.0281839	0.320324
AFUB_019700	3,146,669,559	-0.135581	0.061833	-2,192,702,298	0.0283288	0.321375
AFUB_003440	8,860,311,063	0.0579099	0.0264211	2,191,804,607	0.0283936	0.321514
AFUB_053190	7,913,364,389	-0.107489	0.0490975	-2,189,300,133	0.028575	0.321784
AFUB_054850	482,063,643	-0.0584576	0.0266911	-2,190,151,364	0.0285133	0.321784
AFUB_064100	3,308,954,407	0.126134	0.0576051	2,189,635,447	0.0285507	0.321784
AFUB_015160	1,369,685,863	-0.0939372	0.0429906	-2,185,065,247	0.0288841	0.32289
AFUB_038060	6,705,998,387	0.108357	0.0495547	2,186,604,152	0.0287714	0.32289
AFUB_058070	8,717,380,171	-0.104328	0.0477322	-2,185,692,797	0.0288381	0.32289
AFUB_095890	1,539,600,389	-0.0683692	0.0312881	-2,185,146,672	0.0288781	0.32289
AFUB_051470	4,783,256,883	-0.150459	0.0689161	-2,183,227,065	0.0290191	0.323809
AFUB_024720	3,091,449,426	0.0852504	0.0391084	2,179,847,136	0.0292688	0.32541
AFUB_042040	9,396,979,724	0.110419	0.0506399	2,180,464,914	0.029223	0.32541
AFUB_049530	1,190,363,963	0.0888422	0.0408221	2,176,327,638	0.0295308	0.327727
AFUB_022510	307,190,399	-0.0995114	0.0458537	-2,170,192,784	0.0299922	0.331972
AFUB_037540	265,374,458	-0.156264	0.0720413	-2,169,090,024	0.0300759	0.331972
AFUB_064130	7,203,424,748	0.113705	0.0524167	2,169,250,422	0.0300637	0.331972
AFUB_083780	5,008,415,582	0.109334	0.0504441	2,167,424,492	0.0302025	0.332771
AFUB_041300	3,483,707,923	0.0718983	0.0331849	2,166,595,074	0.0302657	0.332869
AFUB_071220	143,452,927	0.0731866	0.0338166	2,164,219,749	0.0304475	0.334268
AFUB_019950	3,939,698,719	-0.127905	0.0592748	-2,157,827,085	0.0309413	0.337692
AFUB_031250	3,040,878,351	-0.1387	0.0642761	-2,157,884,196	0.0309368	0.337692
AFUB_077850	8,904,581,918	-0.162738	0.0754171	-2,157,840,866	0.0309402	0.337692
AFUB_086810	2,746,887,396	-0.0798484	0.0370126	-2,157,331,031	0.0309799	0.337692
AFUB_050590	1,988,976,593	-0.0986912	0.0457718	-2,156,156,596	0.0310714	0.338088
AFUB_037770	2,042,856,778	0.0779959	0.036213	2,153,810,838	0.031255	0.338882
AFUB_081760	4,358,046,573	0.115038	0.0534065	2,154,000,755	0.0312401	0.338882
AFUB_098680	2,963,897,749	-0.129437	0.0601254	-2,152,792,904	0.031335	0.339148
AFUB_101170	7,953,955,725	0.0990857	0.0460726	2,150,643,301	0.0315044	0.34038
AFUB_042940	2,106,047,586	-0.0689969	0.0321338	-2,147,175,836	0.0317793	0.342746
AFUB_042670	865,561,769	-0.0910534	0.0424451	-2,145,202,253	0.0319367	0.343838
AFUB_098870	5,507,845,689	-0.103506	0.0482929	-214,328,676	0.0320901	0.344884
AFUB_052800	4,586,785,634	0.109532	0.0511495	214,140,572	0.0322413	0.345903
AFUB_009320	6,485,655,055	0.101509	0.0474398	2,139,743,584	0.0323755	0.346735
AFUB_095670	1,132,744,035	-0.0901221	0.0421682	-2,137,205,458	0.0325813	0.34833
AFUB_037360	3,494,040,929	-0.0582962	0.0273078	-2,134,779,856	0.032779	0.349225
AFUB_047680	3,626,074,882	-0.131376	0.0615233	-21,353,837	0.0327297	0.349225
AFUB_008380	7,517,238,209	0.0907139	0.0425527	2,131,800,971	0.0330232	0.351216
AFUB_043670	1,122,044,396	-0.0866368	0.0406618	-2,130,669,986	0.0331163	0.351596
AFUB_059480	1,058,605,308	-0.0859533	0.0404076	-2,127,159,391	0.0334068	0.35372
AFUB_076900	8,134,802,139	-0.0845401	0.0397488	-212,685,757	0.0334319	0.35372
AFUB_010820	1,789,273,213	0.0724205	0.03416	2,120,037,226	0.0340029	0.354918
AFUB_022800	4,325,234,985	-0.114578	0.0539976	-212,191,016	0.0338453	0.354918
AFUB_035240	1,677,031,036	0.0825168	0.0388926	212,165,891	0.0338664	0.354918
AFUB_045800	2,905,509,434	-0.0823162	0.0387595	-2,123,766,617	0.0336897	0.354918
AFUB_066250	464,539,659	-0.137883	0.0650109	-2,120,922,662	0.0339283	0.354918
AFUB_066450	1,562,538,893	0.103055	0.0485472	2,122,771,677	0.033773	0.354918
AFUB_069520	3,801,334,585	-0.121536	0.0573293	-2,119,969,511	0.0340086	0.354918
AFUB_095430	7,450,253,561	0.103632	0.0487731	2,124,777,413	0.0336052	0.354918
AFUB_096010	7,004,846,322	0.109919	0.0518716	2,119,058,432	0.0340855	0.355116
AFUB_040390	4,996,909,644	-0.11294	0.0533351	-2,117,545,902	0.0342135	0.35543
AFUB_047510	7,402,849,933	0.0617821	0.0291869	2,116,777,169	0.0342788	0.35543
AFUB_073890	6,929,923,925	-0.108853	0.0514273	-2,116,647,097	0.0342898	0.35543
AFUB_068630	2,284,266,546	-0.170174	0.0804315	-2,115,758,464	0.0343654	0.355612
AFUB_095160	1,679,035,269	-0.0815347	0.0385673	-211,408,783	0.0345078	0.355883
AFUB_099600	232,126,691	-0.0874073	0.0413353	-2,114,593,718	0.0344646	0.355883
AFUB_020370	5,679,166,876	0.066868	0.0316451	211,306,168	0.0345955	0.356107
AFUB_040590	7,832,576,878	0.0853621	0.0404196	211,189,805	0.0346952	0.356107
AFUB_075970	3,195,505,272	-0.127683	0.0604618	-211,179,702	0.0347039	0.356107
AFUB_009510	2,089,633,151	-0.0683622	0.0323841	-2,110,982,172	0.0347738	0.356228
AFUB_010830	1,806,597,028	0.0767385	0.0364106	210,758,637	0.0350668	0.357436
AFUB_013890	9,361,145,549	0.0936305	0.04442	2,107,848,464	0.0350441	0.357436
AFUB_084740	3,096,767,978	-0.0958901	0.045474	-2,108,677,687	0.0349724	0.357436
AFUB_037580	1,859,966,098	-0.068147	0.0323449	-2,106,884,428	0.0351276	0.357461
AFUB_031480	2,570,930,512	0.142413	0.0676454	2,105,292,106	0.0352659	0.35768
AFUB_099230	5,229,380,792	-0.118129	0.056108	-2,105,388,581	0.0352575	0.35768
AFUB_085390	7,490,448,483	0.11151	0.0529853	2,104,544,622	0.035331	0.357748
AFUB_051960	3,232,033,916	-0.0678551	0.0322654	-2,103,028,803	0.0354633	0.35803
AFUB_059330	8,673,185,083	-0.100099	0.0476006	-2,102,885,776	0.0354758	0.35803
AFUB_000580	9,709,563,422	0.0828179	0.0394925	209,705,425	0.0359888	0.360961
AFUB_022270	4,972,778,699	0.11765	0.0561065	209,690,731	0.0360018	0.360961
AFUB_070650	1,718,313,203	-0.0727548	0.0346846	-209,760,867	0.0359397	0.360961
AFUB_099020	1,117,332,455	-0.0800349	0.0381463	-2,098,100,171	0.0358963	0.360961
AFUB_088600	109,696,893	-0.112801	0.0538182	-2,095,955,373	0.0360861	0.361215
AFUB_025800	3,291,189,049	0.0732522	0.0349887	2,093,598,943	0.0362957	0.362523
AFUB_083400	4,385,203,459	0.118487	0.0566068	2,093,157,372	0.0363351	0.362523
AFUB_029250	3,335,722,838	0.0660086	0.0315458	2,092,471,687	0.0363963	0.362543
AFUB_020850	6,558,624,137	-0.11093	0.0530374	-2,091,549,223	0.0364789	0.362558
AFUB_020930	420,701,176	-0.126049	0.0602961	-2,090,500,785	0.0365728	0.362558
AFUB_036810	9,838,616,486	0.0852812	0.0407952	2,090,472,337	0.0365754	0.362558
AFUB_029750	7,786,396,334	0.0976239	0.0468122	2,085,437,973	0.0370296	0.366467
AFUB_008920	9,496,760,111	0.088337	0.04238	2,084,402,703	0.0371236	0.366805
AFUB_017740	7,263,040,348	0.0896229	0.0430662	208,105,094	0.0374292	0.368636
AFUB_090160	5,439,932,539	-0.15179	0.0729243	-2,081,472,943	0.0373906	0.368636
AFUB_063980	5,701,803,884	0.0588935	0.0283207	2,079,518,214	0.0375697	0.369426
AFUB_031960	9,490,339,442	-0.0824985	0.0397155	-2,077,235,477	0.0377798	0.370896
AFUB_013480	2,338,300,117	0.0640947	0.0308854	2,075,241,011	0.0379642	0.370923
AFUB_048310	3,439,236,095	-0.138288	0.0666319	-2,075,404,188	0.0379491	0.370923
AFUB_076400	1,458,726,629	-0.0856085	0.0412411	-207,580,222	0.0379122	0.370923
AFUB_034660	5,004,279,324	-0.109157	0.0526578	-2,072,960,413	0.038176	0.372398
AFUB_032860	4,510,005,621	0.130903	0.0632623	2,069,218,293	0.0385256	0.37343
AFUB_034580	1,314,986,855	0.0569734	0.0275283	2,069,625,838	0.0384874	0.37343
AFUB_082910	24,336,084,665,452	-0.0765059	0.0369396	-2,071,109,819	0.0383485	0.37343
AFUB_093070	1,648,655,114	-0.0577072	0.0278782	-2,069,978,068	0.0384544	0.37343
AFUB_098200	8,025,747,107	-0.109996	0.0531952	-2,067,775,487	0.0386611	0.374152
AFUB_018960	2,479,151,534	-0.138969	0.0672473	-2,066,535,938	0.0387779	0.37469
AFUB_067510	3,213,692,971	0.0718904	0.0348039	2,065,585,901	0.0388676	0.374965
AFUB_051420	3,665,143,275	-0.0699766	0.0339371	-2,061,951,796	0.0392123	0.377696
AFUB_057470	361,303,944	0.143074	0.0694416	2,060,351,956	0.0393649	0.378571
AFUB_088060	1,823,087,862	-0.0871294	0.042348	-2,057,460,045	0.039642	0.380638
AFUB_061640	1,817,694,809	-0.0632458	0.0307508	-2,056,720,125	0.0397132	0.380724
AFUB_007840	4,221,796,889	-0.120928	0.0588531	-2,054,738,277	0.0399043	0.38128
AFUB_032180	9,921,669,333	0.0783377	0.0381357	205,418,452	0.0399578	0.38128
AFUB_042980	1,651,573,685	-0.0785554	0.0382391	-2,054,320,549	0.0399447	0.38128
AFUB_062050	1,165,154,978	0.0782891	0.0381268	2,053,386,754	0.0400351	0.381423
AFUB_022870	8,964,239,913	0.111953	0.0546437	2,048,786,227	0.040483	0.385092
AFUB_055240	1,593,710,975	0.0720046	0.0351832	2,046,559,987	0.0407013	0.386375
AFUB_068940	895,092,429	0.0931167	0.0455088	2,046,124,973	0.0407441	0.386375
AFUB_017560	6,246,991,419	0.124876	0.0611371	204,255,594	0.0410964	0.389114
AFUB_010030	9,440,900,995	-0.0869363	0.0426253	-203,954,459	0.0413957	0.389843
AFUB_010850	266,945,666	0.0651608	0.0319484	2,039,562,609	0.0413939	0.389843
AFUB_034170	1,676,419,975	-0.103692	0.050867	-2,038,494,125	0.0415005	0.389843
AFUB_048500	8,990,438,978	-0.100959	0.0495397	-2,037,946,879	0.0415552	0.389843
AFUB_052360	3,257,595,888	-0.121588	0.0596488	-2,038,402,897	0.0415097	0.389843
AFUB_052650	7,309,425,125	0.0927582	0.045453	2,040,747,503	0.0412759	0.389843
AFUB_002450	361,492,306	0.0724659	0.0355903	2,036,111,902	0.0417391	0.390969
AFUB_060170	3,241,989,939	-0.14671	0.0721314	-2,033,923,014	0.0419594	0.392432
AFUB_003280	3,717,655,368	-0.120552	0.0592979	-2,032,995,194	0.042053	0.392708
AFUB_009150	5,592,434,755	-0.0968687	0.0477189	-2,029,987,694	0.0423578	0.394953
AFUB_007250	2,736,952,784	-0.0621658	0.0306586	-2,027,676,934	0.0425932	0.395343
AFUB_008140	1,061,002,797	-0.0870101	0.0429095	-2,027,759,032	0.0425848	0.395343
AFUB_089960	2,398,564,651	-0.158038	0.0779172	-2,028,278,259	0.0425319	0.395343
AFUB_002670	1,347,156,491	0.0816986	0.0403192	2,026,293,297	0.0427347	0.395653
AFUB_015830	2,990,229,414	-0.137613	0.0679627	-2,024,837,244	0.0428841	0.395653
AFUB_051550	8,022,396,395	0.0845389	0.0417399	202,537,283	0.0428291	0.395653
AFUB_095980	1,257,804,408	-0.0812982	0.0401507	-2,024,827,649	0.0428851	0.395653
AFUB_002550	4,423,811,233	-0.126972	0.0628602	-2,019,906,963	0.043393	0.396557
AFUB_003810	1,115,607,967	0.0764726	0.0378735	2,019,160,228	0.0434706	0.396557
AFUB_004010	6,544,071,104	0.0665434	0.0329429	2,019,961,598	0.0433874	0.396557
AFUB_024310	1,122,675,667	-0.0579709	0.0287676	-2,015,147,091	0.0438892	0.396557
AFUB_026440	4,253,814,384	0.0739871	0.0366308	2,019,805,096	0.0434036	0.396557
AFUB_034570	4,646,367,266	0.0576341	0.0285687	2,017,384,719	0.0436554	0.396557
AFUB_042170	3,923,021,212	0.123926	0.0614651	2,016,200,774	0.043779	0.396557
AFUB_050330	6,113,250,911	-0.0913647	0.0453305	-2,015,523,268	0.0438499	0.396557
AFUB_055580	9,897,753,853	-0.0866245	0.042868	-2,020,724,572	0.0433083	0.396557
AFUB_058670	1,258,712,946	0.0985937	0.0488536	2,018,146,722	0.043576	0.396557
AFUB_069900	5,880,933,833	0.0931566	0.0462218	2,015,423,774	0.0438603	0.396557
AFUB_074390	527,328,263,909	-0.0973844	0.048244	-2,018,580,852	0.0435308	0.396557
AFUB_077220	9,365,751,596	0.0834723	0.0414203	2,015,250,452	0.0438784	0.396557
AFUB_095800	3,699,440,077	-0.119499	0.0592547	-2,016,699,499	0.0437269	0.396557
AFUB_010380	6,221,654,807	-0.10362	0.0514848	-2,012,629,602	0.0441536	0.397401
AFUB_028780	5,277,244,767	-0.123613	0.0614166	-2,012,692,484	0.044147	0.397401
AFUB_050860	504,306,804	-0.222941	0.110783	-2,012,404,919	0.0441773	0.397401
AFUB_073060	1,684,064,323	0.0735356	0.0365595	2,011,395,855	0.0442837	0.397774
AFUB_069680	5,887,864,533	-0.083114	0.0414239	-2,006,426,935	0.0448107	0.401919
AFUB_063750	457,461,757	0.0681418	0.0340073	2,003,742,307	0.0450977	0.403901
AFUB_019310	699,748,664	-0.0942296	0.0471057	-200,038,357	0.0454589	0.406542
AFUB_004050	5,758,957,792	-0.099381	0.0498195	-1,994,819,445	0.0460626	0.406884
AFUB_009100	7,954,236,928	0.0825879	0.0413159	1,998,939,014	0.045615	0.406884
AFUB_012880	4,916,790,808	-0.108352	0.0542863	-1,995,946,277	0.0459398	0.406884
AFUB_022430	2,738,671,189	-0.152174	0.0762048	-1,996,903,491	0.0458357	0.406884
AFUB_029490	1,215,328,062	0.0824441	0.0413295	1,994,801,217	0.0460646	0.406884
AFUB_065930	3,391,454,678	0.114908	0.0575652	1,996,140,198	0.0459187	0.406884
AFUB_090850	9,439,578,129	0.0815784	0.0408261	1,998,193,521	0.0456957	0.406884
AFUB_096550	2,658,663,698	-0.133252	0.0667686	-1,995,727,473	0.0459636	0.406884
AFUB_098890	7,875,857,402	0.0811992	0.0407111	199,452,254	0.046095	0.406884
AFUB_096600	1,145,507,015	-0.0494948	0.0248295	-1,993,390,112	0.0462187	0.40739
AFUB_069760	3,225,072,347	0.0655018	0.0328778	1,992,281,473	0.0463402	0.407874
AFUB_013840	6,348,991,569	-0.0932915	0.0469159	-1,988,481,424	0.0467585	0.410662
AFUB_052300	489,799,871	0.1022	0.0514038	1,988,186,642	0.0467911	0.410662
AFUB_024510	1,856,072,422	-0.0628542	0.0316248	-1,987,494,376	0.0468676	0.410741
AFUB_039000	4,974,531,614	-0.0982309	0.0494545	-1,986,289,616	0.0470012	0.410741
AFUB_099590	8,189,208,996	0.0488554	0.0245924	1,986,602,081	0.0469665	0.410741
AFUB_064220	4,204,634,564	0.112629	0.0567592	1,984,327,613	0.0472193	0.412059
AFUB_006970	6,016,460,674	-0.110293	0.0556222	-1,982,892,705	0.0473794	0.412282
AFUB_082750	4,093,004,211	-0.127328	0.0641939	-1,983,484,433	0.0473133	0.412282
AFUB_066120	7,941,710,338	-0.0829429	0.0419063	-1,979,244,036	0.0477885	0.415252
AFUB_024930	8,058,888,415	0.0836289	0.0423083	1,976,657,458	0.0480804	0.415811
AFUB_043290	1,526,096,843	0.0676575	0.0342277	197,668,608	0.0480771	0.415811
AFUB_078170	1,846,379,019	-0.0695833	0.0352094	-1,976,268,506	0.0481244	0.415811
AFUB_085660	9,167,192,419	-0.117953	0.0596408	-1,977,719,144	0.0479604	0.415811
AFUB_080560	5,202,529,277	-0.0634284	0.0321343	-1,973,853,465	0.0483984	0.41759
AFUB_037870	5,540,894,215	-0.102291	0.0518893	-1,971,335,672	0.0486855	0.418419
AFUB_055200	1,945,933,655	0.0627891	0.0318575	1,970,935,288	0.0487313	0.418419
AFUB_067870	4,470,848,652	-0.104709	0.0531353	-1,970,616,316	0.0487678	0.418419
AFUB_091570	1,242,705,387	-0.0542266	0.0275085	-1,971,268,148	0.0486932	0.418419
AFUB_054560	1,005,878,518	0.0947844	0.0481461	1,968,680,676	0.0489898	0.41915
AFUB_069710	8,631,878,557	0.086789	0.044076	1,969,074,561	0.0489445	0.41915
AFUB_042450	7,287,669,696	-0.0858559	0.0436258	-196,800,862	0.049067	0.419226
AFUB_022820	4,479,213,655	0.104265	0.0530005	1,967,253,932	0.0491539	0.419383
AFUB_002990	7,752,663,201	-0.0864752	0.043998	-1,965,432,596	0.0493642	0.419901
AFUB_038170	2,078,753,128	0.0647478	0.0329451	1,965,325,684	0.0493766	0.419901
AFUB_069290	2,563,310,301	-0.14116	0.0718605	-1,964,356,065	0.0494888	0.419901
AFUB_080570	9,858,433,593	-0.0947666	0.0482288	-1,964,936,457	0.0494216	0.419901
AFUB_038920	6,712,483,369	0.0880759	0.0448757	1,962,661,878	0.0496855	0.419979
AFUB_040770	317,766,808	0.119073	0.0606521	1,963,220,384	0.0496206	0.419979
AFUB_064290	225,738,281	0.16126	0.0821707	1,962,504,971	0.0497037	0.419979
AFUB_073820	1,435,735,354	-0.0727596	0.0370995	-1,961,203,566	0.0498553	0.42027
AFUB_082550	3,163,742,342	-0.0547812	0.0279349	-1,961,031,797	0.0498753	0.42027
AFUB_038180	3,011,158,216	0.12771	0.0651549	1,960,097,564	0.0499844	0.42061
AFUB_027920	1,536,778,352	-0.0855315	0.0436572	-1,959,159,882	0.0500941	0.420955
AFUB_001940	2,364,934,719	-0.141185	0.0721233	-1,957,547,793	0.0502831	0.421387
AFUB_057420	1,193,938,135	0.0766645	0.0391599	195,773,093	0.0502616	0.421387
AFUB_064440	3,468,114,071	-0.137311	0.0703554	-195,167,791	0.0509765	0.426614
AFUB_093820	22,453,613,889,241	-0.0739516	0.0379193	-1,950,237,433	0.0511478	0.427465
AFUB_013080	9,652,562,162	0.0796888	0.0409096	1,947,927,392	0.0514237	0.4286
AFUB_061630	5,710,890,236	0.0582325	0.02989	1,948,226,644	0.0513878	0.4286
AFUB_028160	2,651,268,526	-0.0824293	0.0423721	-1,945,364,811	0.0517311	0.42941
AFUB_037840	1,045,288,623	0.081863	0.0420586	1,946,403,793	0.0516063	0.42941
AFUB_061670	1,929,499,267	-0.0708497	0.0364165	-194,553,917	0.0517101	0.42941
AFUB_023150	5,684,500,168	-0.10357	0.0532753	-1,944,046,819	0.0518898	0.429563
AFUB_025530	2,290,606,975	-0.151278	0.0778004	-1,944,432,661	0.0518433	0.429563
AFUB_021410	157,582,221	-0.080868	0.0416259	-194,273,141	0.0520486	0.430297
AFUB_009470	1,255,682,918	-0.068109	0.0350783	-1,941,625,155	0.0521825	0.430822
AFUB_017400	1,469,621,081	0.0722832	0.0372473	194,062,728	0.0523035	0.43124
AFUB_072820	1,146,083,243,287	-0.0791987	0.0408374	-1,939,369,238	0.0524564	0.431919
AFUB_051950	8,539,176,304	0.0875618	0.0451753	1,938,267,464	0.0525906	0.432443
AFUB_015740	429,091,337	0.11369	0.0587085	193,652,051	0.052804	0.433616
AFUB_000630	4,250,440,382	0.0559741	0.0289317	1,934,695,733	0.0530276	0.434209
AFUB_047190	6,476,661,402	0.153196	0.0792275	1,933,620,707	0.0531598	0.434209
AFUB_064000	5,308,394,865	-0.0953895	0.0493188	-1,934,139,679	0.053096	0.434209
AFUB_077510	7,268,664,917	-0.0863856	0.0446438	-1,934,997,491	0.0529906	0.434209
AFUB_022360	2,737,047,545	-0.131739	0.0681613	-1,932,756,956	0.0532661	0.434499
AFUB_085780	1,361,491,634	-0.0806167	0.0417331	-1,931,718,355	0.0533943	0.434965
AFUB_047130	5,866,085,682	-0.088046	0.0456177	-1,930,081,849	0.0535967	0.435455
AFUB_090050	4,447,571,422	0.0698143	0.0361664	1,930,363,476	0.0535618	0.435455
AFUB_016570	2,910,130,628	0.126055	0.0654815	1,925,053,565	0.0542227	0.43959
AFUB_087570	1,494,366,847	0.123584	0.0642048	1,924,842,484	0.0542491	0.43959
AFUB_063340	5,814,220,808	0.0925587	0.0481048	1,924,104,591	0.0543415	0.439757
AFUB_013830	7,855,757,909	0.0773473	0.0402601	1,921,187,137	0.0547081	0.44214
AFUB_024670	2,192,184,904	0.0810842	0.0422249	1,920,294,514	0.0548207	0.442466
AFUB_005950	8,619,598,185	-0.0789576	0.0411458	-1,918,970,669	0.054988	0.44266
AFUB_055000	1,447,646,209	0.0650858	0.0339281	1,918,346,876	0.055067	0.44266
AFUB_055730	460,161,378	-0.123553	0.0644239	-1,917,820,394	0.0551338	0.44266
AFUB_070400	3,003,079,534	-0.0572625	0.0298477	-1,918,490,434	0.0550489	0.44266
AFUB_012660	2,263,690,887	0.133327	0.0696465	1,914,336,135	0.0555772	0.44375
AFUB_029090	7,940,541,581	0.0838873	0.0438597	191,262,937	0.0557955	0.44375
AFUB_046050	3,871,106,793	0.116217	0.0607763	191,221,166	0.0558491	0.44375
AFUB_056360	1,499,749,285	0.0562472	0.0294018	1,913,049,628	0.0557417	0.44375
AFUB_058490	2,772,192,325	0.123215	0.0643896	1,913,590,985	0.0556724	0.44375
AFUB_066520	7,483,230,023	0.109426	0.057142	1,914,991,081	0.0554936	0.44375
AFUB_089270	1,793,600,114	0.065961	0.0344699	1,913,582,118	0.0556736	0.44375
AFUB_096570	4,737,773,428	-0.128055	0.0668838	-1,914,590,312	0.0555448	0.44375
AFUB_073720	3,610,344,576	0.0542594	0.0283869	1,911,425,993	0.0559499	0.443975
AFUB_089650	1,784,278,227	0.0625756	0.0327705	1,909,512,484	0.056196	0.445352
AFUB_098700	1,042,407,801	0.10333	0.0541349	1,908,742,871	0.0562953	0.445562
AFUB_021710	5,338,142,312	0.0944497	0.0495218	1,907,236,582	0.05649	0.446254
AFUB_058940	2,296,323,042	-0.132779	0.0696295	-1,906,939,128	0.0565285	0.446254
AFUB_027480	2,428,018,681	-0.133092	0.0699076	-1,903,826,779	0.0569327	0.448306
AFUB_043420	4,038,709,157	0.0813038	0.0427375	1,902,401,716	0.0571187	0.448306
AFUB_062040	3,072,347,943	0.123164	0.0647234	1,902,926,783	0.0570501	0.448306
AFUB_068810	3,097,848,083	-0.116885	0.0614796	-19,011,929	0.0572768	0.448306
AFUB_071140	9,243,107,228	-0.0856854	0.0450672	-1,901,282,109	0.0572651	0.448306
AFUB_072770	8,754,596,285	0.0867643	0.04559	1,903,141,402	0.0570221	0.448306
AFUB_101440	1,154,277,547	0.0680015	0.0357712	1,901,010,271	0.0573007	0.448306
AFUB_066350	8,165,646,462	0.0946873	0.0499514	1,895,588,033	0.0580145	0.453313
AFUB_041620	1,081,930,959	-0.0715577	0.0377823	-1,893,950,766	0.0582315	0.454429
AFUB_041500	1,318,111,155	0.0708648	0.0374499	1,892,259,036	0.0584565	0.455604
AFUB_021670	463,159,194	0.070993	0.0376108	1,887,567,683	0.059084	0.45941
AFUB_073490	5,252,017,225	-0.0883691	0.0468184	-1,887,486,938	0.0590949	0.45941
AFUB_035140	4,650,676,434	-0.110606	0.058628	-188,657,951	0.0592169	0.459775
AFUB_059050	6,038,673,188	0.0935823	0.0496468	1,884,960,057	0.0594352	0.460886
AFUB_031650	8,762,876,485	0.0825609	0.0438221	1,884,001,941	0.0595647	0.461306
AFUB_012080	7,717,079,443	0.0550972	0.029278	1,881,865,869	0.0598542	0.462716
AFUB_087960	3,185,514,701	0.126819	0.0674016	1,881,545,356	0.0598978	0.462716
AFUB_012830	5,341,736,247	0.117408	0.0624224	1,880,871,046	0.0599895	0.462841
AFUB_017830	1,804,406,646	0.0752616	0.040083	1,877,644,726	0.0604298	0.463901
AFUB_020360	5,931,512,728	0.0576048	0.0306638	1,878,592,472	0.0603002	0.463901
AFUB_063370	3,786,270,538	-0.10889	0.0579753	-1,878,217,409	0.0603514	0.463901
AFUB_063470	1,142,395,139	-0.0793774	0.0422703	-1,877,854,309	0.0604011	0.463901
AFUB_030370	3,129,919,401	0.110629	0.0589863	1,875,497,415	0.0607243	0.465578
AFUB_040480	1,350,083,803	0.0661813	0.0353206	1,873,731,963	0.0609674	0.465781
AFUB_057850	3,611,653,766	0.0650232	0.0346945	1,874,160,905	0.0609083	0.465781
AFUB_076740	2,166,313,409	0.0741558	0.0395783	1,873,648,998	0.0609788	0.465781
AFUB_002100	9,029,592,219	-0.120098	0.0642659	-1,868,759,423	0.0616563	0.470355
AFUB_010370	4,203,612,388	0.102593	0.0549147	1,868,221,331	0.0617312	0.470355
AFUB_054630	3,562,719,212	0.108441	0.0580976	1,866,539,039	0.061966	0.471347
AFUB_055340	3,254,509,157	0.118302	0.06341	1,865,665,151	0.0620882	0.471347
AFUB_059210	1,470,992,366	-0.0677594	0.0363197	-1,865,636,547	0.0620922	0.471347
AFUB_029220	6,533,900,544	0.0891775	0.047829	1,864,505,599	0.0622507	0.471965
AFUB_068220	7,243,517,025	-0.0822771	0.0441948	-1,861,691,181	0.0626466	0.47438
AFUB_010180	4,151,769,493	-0.099716	0.0536133	-1,859,912,456	0.0628979	0.474523
AFUB_032420	7,103,865,837	-0.0861066	0.0462698	-1,860,969,571	0.0627485	0.474523
AFUB_092740	6,440,147,963	0.101808	0.0547295	1,860,196,035	0.0628578	0.474523
AFUB_012610	638,400,193	0.0842856	0.0453818	18,572,547	0.0632749	0.47678
AFUB_005630	822,476,642	0.079437	0.0428437	185,411,136	0.0637232	0.477807
AFUB_050940	6,276,436,664	-0.0805643	0.0434403	-185,459,637	0.0636539	0.477807
AFUB_051000	6,459,795,683	0.0678581	0.0365738	1,855,377,017	0.0635424	0.477807
AFUB_056550	1,621,260,001	-0.110578	0.0596385	-1,854,130,133	0.0637205	0.477807
AFUB_032490	2,555,120,103	-0.0738718	0.0398691	-1,852,857,757	0.0639027	0.477896
AFUB_036180	3,543,028,232	-0.114121	0.0615766	-1,853,321,636	0.0638363	0.477896
AFUB_064120	2,365,152,287	0.0623714	0.0336707	1,852,394,926	0.0639691	0.477896
AFUB_019620	3,522,873,438	0.0565092	0.0305903	1,847,291,398	0.0647049	0.478176
AFUB_030000	111,117,434	0.0763526	0.0412835	1,849,471,745	0.0643897	0.478176
AFUB_036640	6,320,419,547	0.0855591	0.0463346	1,846,550,476	0.0648123	0.478176
AFUB_039450	7,146,304,333	0.0837589	0.045351	1,846,903,494	0.0647611	0.478176
AFUB_040190	7,903,542,915	-0.109638	0.059386	-1,846,185,592	0.0648653	0.478176
AFUB_043280	1,665,994,618	0.0750034	0.0405882	1,847,912,354	0.064615	0.478176
AFUB_044640	2,341,321,804	-0.0622447	0.0336849	-18,478,531	0.0646236	0.478176
AFUB_051400	9,149,277,328	0.0892507	0.0482813	1,848,556,631	0.0645219	0.478176
AFUB_051870	1,797,842,941,449	0.0643155	0.0347697	1,849,756,842	0.0643486	0.478176
AFUB_065520	4,225,430,909	-0.131551	0.0711588	-1,848,696,088	0.0645017	0.478176
AFUB_088480	3,387,822,488	-0.114727	0.062047	-1,849,040,401	0.064452	0.478176
AFUB_002980	404,053,916	0.0991239	0.0537075	1,845,626,541	0.0649465	0.478199
AFUB_028280	6,363,089,845	-0.107191	0.0581634	-1,842,929,409	0.0653393	0.478846
AFUB_060450	1,247,599,457	0.0692965	0.0376023	184,287,752	0.0653469	0.478846
AFUB_067350	441,192,575	0.0691435	0.0375189	1,842,896,084	0.0653442	0.478846
AFUB_077840	778,430,684	-0.0972912	0.0527713	-1,843,638,508	0.0652358	0.478846
AFUB_074190	3,578,546,379	0.105948	0.0575884	1,839,751,627	0.0658047	0.481548
AFUB_098930	439,415,308	0.0998734	0.0543	1,839,287,986	0.0658728	0.481548
AFUB_014790	1,041,472,863	0.0677826	0.03696	1,833,946,606	0.0666619	0.482786
AFUB_017420	1,482,205,124	0.0712613	0.0388206	1,835,657,893	0.0664083	0.482786
AFUB_031770	1,051,916,773	0.0670127	0.0365416	183,387,424	0.0666727	0.482786
AFUB_049250	2,081,629,753	0.0678005	0.0369602	1,834,419,638	0.0665917	0.482786
AFUB_060720	6,123,663,164	0.0881009	0.0479753	1,836,380,962	0.0663013	0.482786
AFUB_067080	4,362,936,459	-0.0957981	0.0521556	-1,836,775,833	0.066243	0.482786
AFUB_087440	2,644,009,898	-0.142811	0.0778325	-1,834,853,957	0.0665273	0.482786
AFUB_100330	4,248,854,704	-0.125008	0.0680659	-1,836,578,353	0.0662722	0.482786
AFUB_018560	6,464,780,402	-0.100195	0.0546583	-1,833,108,658	0.0667864	0.482846
AFUB_052290	1,294,198,808	0.0905266	0.0493936	1,832,757,575	0.0668386	0.482846
AFUB_012250	4,730,255,976	-0.100725	0.054993	-1,831,595,662	0.0670117	0.482982
AFUB_013240	3,111,357,152	-0.0874601	0.0477561	-183,139,104	0.0670422	0.482982
AFUB_034540	1,139,651,257	0.0731602	0.0399554	1,831,044,212	0.0670939	0.482982
AFUB_000980	2,496,577,404	0.140927	0.077025	1,829,630,656	0.0673052	0.483507
AFUB_101880	1,125,237,785	0.0765917	0.0418648	1,829,499,871	0.0673248	0.483507
AFUB_002960	4,151,427,372	0.0982239	0.0537126	1,828,692,406	0.0674457	0.483793
AFUB_078600	3,039,138,771	0.108253	0.0592138	1,828,179,642	0.0675226	0.483793
AFUB_001360	4,291,276,828	-0.103722	0.0567948	-1,826,252,625	0.0678122	0.484174
AFUB_008570	5,491,031,871	0.0942263	0.0516382	1,824,740,588	0.0680402	0.484174
AFUB_016720	5,502,516,844	-0.0779903	0.0427119	-1,825,960,533	0.0678562	0.484174
AFUB_058960	1,492,594,007	0.0645571	0.0353675	1,825,322,423	0.0679524	0.484174
AFUB_078160	3,941,712,065	-0.131289	0.0718645	-1,826,900,717	0.0677147	0.484174
AFUB_090920	1,136,952,422	0.0669474	0.03669	1,824,676,371	0.0680499	0.484174
AFUB_093230	2,364,682,763	-0.0570367	0.0312749	-1,823,719,152	0.0681945	0.48464
AFUB_001180	106,804,592,457,152	-0.0586167	0.0321904	-1,820,938,023	0.0686163	0.485261
AFUB_007920	234,375,971	-0.123839	0.0680008	-1,821,140,863	0.0685854	0.485261
AFUB_008170	1,105,604,504	0.0728842	0.0400345	1,820,532,194	0.068678	0.485261
AFUB_054720	4,248,071,092	0.108173	0.0593836	182,160,029	0.0685157	0.485261
AFUB_061110	1,164,785,414	-0.0805084	0.0441822	-1,822,192,735	0.0684257	0.485261
AFUB_052790	3,795,734,347	0.0995117	0.0546787	1,819,934,387	0.068769	0.485344
AFUB_000880	9,286,529,272	-0.0834482	0.0460479	-1,812,202,074	0.069955	0.48572
AFUB_002880	3,555,752,053	0.113798	0.062774	1,812,822,475	0.0698592	0.48572
AFUB_005380	5,862,873,323	0.0836852	0.0463264	1,806,425,205	0.0708519	0.48572
AFUB_006240	9,358,696,848	0.0658795	0.0364231	1,808,727,659	0.0704933	0.48572
AFUB_006840	3,547,281,722	-0.11464	0.0634845	-1,805,789,001	0.0709513	0.48572
AFUB_010990	1,065,308,872	-0.0710494	0.0393178	-1,807,054,491	0.0707538	0.48572
AFUB_018390	2,994,591,402	-0.114154	0.062981	-1,812,521,098	0.0699057	0.48572
AFUB_019410	1,685,707,428	-0.0643698	0.0355315	-1,811,627,352	0.0700438	0.48572
AFUB_019660	1,749,025,336	0.0658388	0.0363637	1,810,561,359	0.0702088	0.48572
AFUB_026910	2,899,517,384	0.0706526	0.0389785	1,812,603,051	0.0698931	0.48572
AFUB_027260	2,540,777,816	-0.0606331	0.0334784	-1,811,108,482	0.0701241	0.48572
AFUB_030920	2,707,748,102	-0.141237	0.0778946	-1,813,185,447	0.0698032	0.48572
AFUB_032200	1,172,165,758	0.0689299	0.0381527	1,806,686,504	0.0708112	0.48572
AFUB_032620	3,969,989,245	0.100137	0.0552722	1,811,713,017	0.0700306	0.48572
AFUB_037410	7,766,409,272	-0.0816403	0.0449309	-1,817,017,733	0.0692144	0.48572
AFUB_041610	2,300,764,312	0.0877629	0.0485734	1,806,808,218	0.0707922	0.48572
AFUB_046550	8,218,380,282	0.0838971	0.0464853	1,804,808,273	0.0711047	0.48572
AFUB_047880	6,945,774,383	0.090176	0.0498648	1,808,409,147	0.0705428	0.48572
AFUB_048430	3,330,788,938	-0.136452	0.0755873	-1,805,228,867	0.0710389	0.48572
AFUB_054770	5,771,139,543	-0.0856168	0.0472118	-1,813,460,308	0.0697609	0.48572
AFUB_058450	8,931,825,223	0.0776673	0.0427542	1,816,598,662	0.0692786	0.48572
AFUB_060470	6,593,411,681	-0.0837981	0.0464332	-1,804,700,558	0.0711216	0.48572
AFUB_067070	6,711,121,516	0.0810699	0.0446481	1,815,754,145	0.0694081	0.48572
AFUB_075340	1,771,336,914	0.0558825	0.0307248	1,818,805,297	0.0689411	0.48572
AFUB_088980	5,303,163,099	-0.0947613	0.0524379	-1,807,115,422	0.0707443	0.48572
AFUB_092670	5,635,191,805	-0.0944192	0.0519224	-1,818,467,531	0.0689927	0.48572
AFUB_092780	1,250,014,882	0.0821154	0.0452433	1,814,972,848	0.0695281	0.48572
AFUB_095710	4,515,533,099	-0.0526106	0.0290085	-1,813,626,442	0.0697353	0.48572
AFUB_099750	1,984,327,215	0.0591813	0.0327001	1,809,817,277	0.0703241	0.48572
AFUB_007760	150,187,791	-0.085608	0.047548	-1,800,452,574	0.0717892	0.486483
AFUB_014680	3,715,227,571	0.110774	0.061473	1,802,001,765	0.0715451	0.486483
AFUB_052770	5,838,359,586	0.0868033	0.0482026	1,800,801,697	0.0717341	0.486483
AFUB_054620	226,445,583	-0.124832	0.069314	-180,096,209	0.0717089	0.486483
AFUB_055160	2,017,468,637	-0.0933712	0.0518023	-1,802,452,162	0.0714743	0.486483
AFUB_068320	3,248,630,121	0.112178	0.0622552	1,801,904,137	0.0715605	0.486483
AFUB_068950	3,327,604,918	-0.113384	0.0629321	-1,801,688,847	0.0715944	0.486483
AFUB_043050	3,357,078,607	-0.112748	0.0626429	-1,799,858,346	0.071883	0.48658
AFUB_060610	1,248,218,406	-0.0621841	0.0345862	-1,797,944,563	0.0721858	0.487028
AFUB_074290	1,752,278,305	-0.0740079	0.0411488	-179,854,301	0.072091	0.487028
AFUB_096850	6,162,163,081	0.0868801	0.0483222	1,797,932,706	0.0721877	0.487028
AFUB_015260	8,007,086,429	-0.0642682	0.0357692	-179,674,514	0.0723761	0.487762
AFUB_082580	2,484,294,543	0.075562	0.042101	1,794,778,583	0.072689	0.4888
AFUB_082720	5,047,836,412	-0.113856	0.0634376	-1,794,774,469	0.0726896	0.4888
AFUB_093200	5,644,145,119	-0.0838679	0.046747	-1,794,079,131	0.0728005	0.489009
AFUB_096450	1,474,862,166	-0.0660451	0.0368426	-1,792,627,675	0.0730325	0.49003
AFUB_064980	1,515,302,905	-0.0930464	0.051949	-1,791,112,207	0.0732753	0.491121
AFUB_016250	3,679,648,889	0.121751	0.0680707	1,788,588,784	0.0736811	0.493301
AFUB_007580	1,005,520,406	-0.068439	0.038279	-1,787,898,335	0.0737924	0.493507
AFUB_004040	2,380,928,682	0.0751293	0.0421088	1,784,172,946	0.0743956	0.496457
AFUB_028670	7,523,007,405	-0.081362	0.0455901	-1,784,644,085	0.0743191	0.496457
AFUB_015330	181,474,785	-0.0595112	0.0334032	-1,781,603,057	0.074814	0.498164
AFUB_059080	3,274,846,752	-0.134752	0.0756318	-1,781,686,086	0.0748004	0.498164
AFUB_082270	7,328,555,776	-0.082317	0.0462541	-1,779,668,272	0.0751303	0.499726
AFUB_002480	3,554,598,401	-0.1094	0.061579	-1,776,575,999	0.075638	0.500316
AFUB_008990	2,587,912,765	0.121331	0.0684949	1,771,392,268	0.0764955	0.500316
AFUB_014110	4,125,021,096	-0.104866	0.0590334	-1,776,393,023	0.0756682	0.500316
AFUB_022860	651,255,992	0.0876752	0.049392	1,775,088,179	0.0758833	0.500316
AFUB_023650	3,700,434,818	0.0584364	0.0329167	1,775,282,456	0.0758513	0.500316
AFUB_026220	7,160,195,199	-0.0806895	0.0454563	-1,775,099,948	0.0758814	0.500316
AFUB_026510	6,664,442,129	0.0942992	0.0530502	1,777,548,325	0.0754781	0.500316
AFUB_027950	8,396,617,089	0.07955	0.0447696	177,687,587	0.0755887	0.500316
AFUB_039540	6,169,857,873	0.0882395	0.0497291	1,774,403,342	0.0759965	0.500316
AFUB_057150	1,342,918,864	-0.0896779	0.0506589	-1,770,228,732	0.076689	0.500316
AFUB_067650	8,212,031,334	-0.0866769	0.0489108	-1,772,142,553	0.0763709	0.500316
AFUB_074230	3,576,675,324	0.0476781	0.0269291	1,770,504,051	0.0766432	0.500316
AFUB_079270	343,509,649	-0.120429	0.0679064	-1,773,455,123	0.0761533	0.500316
AFUB_079800	3,689,475,521	0.107999	0.0609897	1,770,772,026	0.0765986	0.500316
AFUB_081510	6,658,850,911	-0.100027	0.0564505	-1,771,951,057	0.0764027	0.500316
AFUB_091590	5,666,618,753	-0.0906967	0.0511372	-1,773,593,776	0.0761304	0.500316
AFUB_094270	7,587,196,013	0.0794689	0.0448349	1,772,477,375	0.0763153	0.500316
AFUB_097870	3,379,019,023	-0.10846	0.0610648	-1,776,146,556	0.0757088	0.500316
AFUB_052500	3,890,537,549	-0.111851	0.0632114	-176,947,161	0.0768152	0.500606
AFUB_085610	1,141,289,515	0.0752686	0.0425604	1,768,513,722	0.0769751	0.501115
AFUB_044970	3,248,120,868	-0.0697355	0.0394714	-1,766,734,172	0.0772728	0.502086
AFUB_093600	1,006,095,604	-0.0746689	0.042266	-1,766,642,589	0.0772881	0.502086
AFUB_005130	4,011,102,017	0.097158	0.0550209	1,765,837,524	0.0774231	0.50243
AFUB_015670	9,907,689,978	-0.0854754	0.0484262	-1,765,064,124	0.077553	0.50274
AFUB_003150	6,011,602,603	0.0919799	0.0521845	1,762,590,806	0.0779695	0.504373
AFUB_038110	1,089,061,183	-0.0688746	0.0390682	-1,762,933,595	0.0779117	0.504373
AFUB_080670	1,224,669,789	0.0735259	0.0417309	1,761,906,103	0.0780852	0.504588
AFUB_058110	1,362,500,471	0.0792834	0.0450196	1,761,084,988	0.078224	0.504953
AFUB_028260	2,371,082,823	0.0631135	0.0358815	1,758,941,894	0.0785874	0.506765
AFUB_055660	1,019,092,548	0.0682717	0.0388271	1,758,351,525	0.0786877	0.506878
AFUB_005180	8,741,583,829	-0.0686607	0.0390775	-175,704,145	0.0789107	0.507173
AFUB_019640	3,340,881,939	-0.119175	0.0678582	-1,756,243,133	0.0790469	0.507173
AFUB_059960	10,361,660,835,733	-0.0543956	0.0309786	-1,755,909,436	0.0791039	0.507173
AFUB_066220	4,593,456,725	0.0905891	0.0515985	1,755,653,944	0.0791475	0.507173
AFUB_071620	4,047,495,734	0.0951376	0.0541786	1,756,000,393	0.0790883	0.507173
AFUB_010590	1,007,712,274	-0.0699083	0.0398318	-1,755,086,296	0.0792445	0.507264
AFUB_052820	2,953,287,569	-0.112204	0.063975	-1,753,870,001	0.0794528	0.508067
AFUB_072250	2,974,059,013	0.0612592	0.0349419	1,753,173,602	0.0795722	0.5083
AFUB_062900	3,695,542,736	-0.0526547	0.030053	-17,520,578	0.0797639	0.508993
AFUB_088560	7,631,060,429	-0.0718434	0.0410258	-1,751,174,913	0.0799158	0.509432
AFUB_065020	6,070,687,878	0.0845931	0.0483459	1,749,744,784	0.0801624	0.510473
AFUB_006090	1,094,811,356	0.0839872	0.0480681	1,747,253,668	0.0805933	0.511777
AFUB_006340	3,041,437,551	0.112773	0.0645665	1,746,614,548	0.0807042	0.511777
AFUB_019600	2,711,554,947	-0.114906	0.0658053	-1,746,149,742	0.0807849	0.511777
AFUB_037110	6,286,728,945	0.0789143	0.0451703	1,747,039,052	0.0806306	0.511777
AFUB_096040	1,196,868,317	-0.0584066	0.0334203	-1,747,635,256	0.0805272	0.511777
AFUB_037250	7,606,909,772	0.0772387	0.0442506	1,745,484,828	0.0809005	0.51198
AFUB_007270	350,696,869	0.113148	0.0648545	1,744,648,044	0.0810462	0.512372
AFUB_041800	7,242,473,091	0.0847723	0.0486077	1,744,010,755	0.0811572	0.512545
AFUB_038360	5,470,871,309	-0.0980507	0.0562518	-1,743,067,765	0.0813218	0.513056
AFUB_037400	8,980,277,084	0.0720345	0.0413406	1,742,462,932	0.0814275	0.513194
AFUB_075300	1,536,850,394	0.0641272	0.0368215	1,741,569,461	0.0815838	0.513651
AFUB_004570	1,267,564,169	-0.0769804	0.0442382	-1,740,135,785	0.0818352	0.513795
AFUB_023350	2,573,931,552	-0.0650461	0.0373827	-1,740,004,159	0.0818583	0.513795
AFUB_071860	7,044,087,121	0.0870773	0.0500288	1,740,542,951	0.0817637	0.513795
AFUB_066760	2,418,461,145	0.143219	0.0823859	1,738,394,198	0.0821414	0.515044
AFUB_060880	4,952,067,243	0.0903855	0.0520309	1,737,151,074	0.0823605	0.51589
AFUB_019190	2,923,147,932	0.109972	0.0634473	1,733,277,144	0.0830464	0.515966
AFUB_023040	5,414,097,051	-0.0521022	0.0300594	-1,733,310,035	0.0830406	0.515966
AFUB_070710	120,009,758	-0.0718414	0.0414218	-1,734,386,968	0.0828494	0.515966
AFUB_072390	460,894,385	0.0761321	0.0439005	1,734,195,929	0.0828833	0.515966
AFUB_074120	2,329,902,898	-0.311141	0.179331	-1,735,010,882	0.0827389	0.515966
AFUB_076040	1,023,871,565	-0.073615	0.0424716	-1,733,277,674	0.0830463	0.515966
AFUB_081920	1,180,513,611	0.0667521	0.0384765	173,488,091	0.0827619	0.515966
AFUB_094470	789,709,416	-0.0541515	0.031191	-1,736,125,287	0.0825417	0.515966
AFUB_049240	9,855,749,808	0.0736016	0.042488	1,732,292,318	0.0832215	0.51653
AFUB_021850	2,122,302,626	0.0637119	0.036812	1,730,734,248	0.0834992	0.516683
AFUB_078830	7,034,721,816	-0.054032	0.0312095	-1,731,265,411	0.0834044	0.516683
AFUB_088970	1,550,049,564	0.062745	0.0362504	1,730,879,172	0.0834733	0.516683
AFUB_053210	4,362,236,325	0.0897097	0.0518486	1,730,223,155	0.0835904	0.516725
AFUB_043190	3,047,527,895	-0.117311	0.0678776	-172,826,651	0.0839405	0.517844
AFUB_043520	7,615,077,924	0.0780633	0.0451652	1,728,397,567	0.083917	0.517844
AFUB_022040	6,358,257,757	-0.0796356	0.0461274	-1,726,427,661	0.0842705	0.518995
AFUB_061750	2,427,040,934	-0.12156	0.0704226	-1,726,153,072	0.0843199	0.518995
AFUB_070440	4,673,381,274	0.146444	0.084855	1,725,812,342	0.0843812	0.518995
AFUB_068680	1,110,252,578	0.0676407	0.039232	1,724,119,194	0.0846863	0.51935
AFUB_089330	4,799,454,791	0.0861106	0.0499341	1,724,484,014	0.0846205	0.51935
AFUB_093130	1,667,049,191	0.0575132	0.0333587	1,724,081,108	0.0846932	0.51935
AFUB_004260	4,898,441,126	0.0848123	0.0492513	172,203,232	0.0850637	0.519637
AFUB_005450	6,831,739,133	0.0847113	0.049262	1,719,606,762	0.0855039	0.519637
AFUB_009040	5,797,570,676	0.0847905	0.0494103	1,716,047,491	0.0861534	0.519637
AFUB_010270	1,032,514,045	0.0720424	0.0418688	1,720,672,909	0.0853102	0.519637
AFUB_012380	1,265,215,052	0.0597931	0.0348529	1,715,585,383	0.086238	0.519637
AFUB_023300	3,533,344,269	0.100361	0.0582615	1,722,591,717	0.0849624	0.519637
AFUB_031350	5,703,216,878	0.0801477	0.0466442	1,718,278,095	0.0857459	0.519637
AFUB_035100	347,288,805	-0.114322	0.0666086	-1,716,318,912	0.0861037	0.519637
AFUB_036470	3,660,153,489	0.123213	0.0715929	1,721,027,984	0.0852457	0.519637
AFUB_038790	130,547,272	0.0617241	0.0359818	1,715,427,176	0.0862669	0.519637
AFUB_059430	2,164,764,205	-0.0672378	0.0390948	-1,719,864,904	0.085457	0.519637
AFUB_068690	4,440,473,785	0.0938192	0.0545835	171,881,849	0.0856474	0.519637
AFUB_072510	7,660,654,792	-0.080195	0.0466858	-1,717,762,356	0.08584	0.519637
AFUB_073970	5,101,496,693	0.0947318	0.055182	1,716,715,161	0.0860312	0.519637
AFUB_074320	2,001,524,744	0.0685259	0.0398931	1,717,737,652	0.0858445	0.519637
AFUB_077020	1,557,086,285	0.0786989	0.0457417	172,050,779	0.0853402	0.519637
AFUB_097490	4,699,797,952	0.101014	0.0588485	1,716,513,024	0.0860682	0.519637
AFUB_101780	2,694,289,253	-0.227882	0.132269	-1,722,867,664	0.0849125	0.519637
AFUB_029080	849,381,127	0.0702798	0.0409818	1,714,904,056	0.0863628	0.519704
AFUB_018940	5,995,365,902	-0.0779632	0.0454789	-1,714,272,345	0.0864787	0.519891
AFUB_067680	2,694,851,384	-0.0531188	0.0310036	-171,330,803	0.0866559	0.520024
AFUB_080710	7,090,907,559	0.120079	0.0700894	171,322,778	0.0866706	0.520024
AFUB_019000	1,248,549,634	-0.0580766	0.0339376	-1,711,273,718	0.0870306	0.521163
AFUB_037350	2,178,375,112	0.0492236	0.0287572	1,711,698,153	0.0869523	0.521163
AFUB_003370	554,151,812	0.0950826	0.0556352	1,709,037,889	0.0874439	0.522721
AFUB_010110	9,361,164,153	-0.0693762	0.040596	-1,708,943,546	0.0874614	0.522721
AFUB_029830	1,873,985,308	-0.0674188	0.0395569	-1,704,350,217	0.0883157	0.52689
AFUB_095190	5,126,895,262	-0.087236	0.0511868	-1,704,267,688	0.0883311	0.52689
AFUB_040620	4,592,473,485	-0.056129	0.0329649	-1,702,687,841	0.0886265	0.527128
AFUB_058080	1,581,215,627	-0.0820057	0.0481629	-1,702,674,068	0.0886291	0.527128
AFUB_078440	5,449,677,222	-0.0859447	0.0504736	-1,702,765,962	0.0886119	0.527128
AFUB_055530	383,141,395	-0.117427	0.0689983	-1,701,880,067	0.0887779	0.527178
AFUB_089100	2,682,941,232	0.0529959	0.0311427	1,701,710,858	0.0888096	0.527178
AFUB_043250	4,192,478,873	0.101498	0.0596646	1,701,148,747	0.0889151	0.527293
AFUB_001700	6,600,903,814	-0.09385	0.055209	-1,699,902,803	0.0891492	0.52817
AFUB_024320	5,772,333,858	0.086506	0.0509255	1,698,677,358	0.08938	0.529026
AFUB_041090	1,295,534,546	-0.0640539	0.0377319	-1,697,607,531	0.0895819	0.529564
AFUB_098520	4,887,113,461	-0.0868605	0.0511763	-1,697,279,318	0.0896439	0.529564
AFUB_029210	8,865,444,431	-0.071955	0.042408	-1,696,730,203	0.0897477	0.529667
AFUB_035000	1,117,743,775	0.0683769	0.040321	1,695,814,435	0.089921	0.530179
AFUB_060890	5,409,755,539	0.0836719	0.0494141	1,693,280,194	0.0904021	0.532503
AFUB_036620	3,492,357,917	0.0466342	0.0275647	1,691,807,753	0.0906826	0.533598
AFUB_090350	355,675,455	0.112088	0.0662698	1,691,390,758	0.0907622	0.533598
AFUB_073240	5,291,213,889	0.0907355	0.0536903	1,689,978,938	0.091032	0.534671
AFUB_010520	2,431,732,418	-0.118943	0.0704211	-1,689,020,579	0.0912155	0.535218
AFUB_053440	8,978,410,529	0.0774418	0.0458621	1,688,580,937	0.0912998	0.535218
AFUB_023180	7,310,561,438	0.0709502	0.0420492	1,687,315,176	0.0915428	0.535617
AFUB_102060	6,290,113,872	-0.0842347	0.0499193	-1,687,417,314	0.0915231	0.535617
AFUB_030220	782,517,079	0.0726002	0.0430709	1,685,599,025	0.0918731	0.536323
AFUB_054530	3,158,076,117	0.0996286	0.0591313	1,684,869,845	0.0920137	0.536323
AFUB_055450	2,745,314,365	0.118415	0.0702661	1,685,232,876	0.0919437	0.536323
AFUB_072940	4,965,580,919	-0.103865	0.0615963	-1,686,221,802	0.0917531	0.536323
AFUB_090140	4,706,270,207	-0.0999989	0.059406	-1,683,312,331	0.0923146	0.537566
AFUB_005280	2,673,420,499	-0.0687645	0.0409173	-1,680,574,031	0.0928457	0.537592
AFUB_013000	582,005,151	0.0859929	0.0511044	1,682,691,799	0.0924348	0.537592
AFUB_026170	1,239,256,238	0.0613798	0.0365112	1,681,121,492	0.0927393	0.537592
AFUB_029480	8,833,260,653	-0.0651943	0.0387876	-1,680,805,491	0.0928007	0.537592
AFUB_066920	5,444,606,573	-0.041192	0.0245017	-1,681,192,031	0.0927256	0.537592
AFUB_082970	790,349,415	0.0757415	0.0450552	1,681,080,359	0.0927473	0.537592
AFUB_006720	1,776,646,815	-0.0541927	0.0322669	-1,679,514,456	0.0930518	0.538144
AFUB_067840	5,408,299,523	0.0851343	0.0507357	1,677,995,953	0.0933479	0.538144
AFUB_074280	6,968,071,177	-0.0871926	0.0519346	-1,678,893,151	0.0931729	0.538144
AFUB_091480	2,572,645,994	-0.112853	0.0672608	-1,677,841,617	0.093378	0.538144
AFUB_095860	2,598,088,594	0.0656997	0.0391575	1,677,830,242	0.0933802	0.538144
AFUB_038100	8,353,244,316	0.069141	0.0412392	1,676,584,221	0.0936238	0.538535
AFUB_082840	6,373,392,936	0.0770431	0.0459524	1,676,585,883	0.0936235	0.538535
AFUB_059200	8,404,695,647	0.0695103	0.0414739	1,675,999,785	0.0937382	0.538687
AFUB_088770	1,355,996,767	-0.0632702	0.0377949	-1,674,037,965	0.0941231	0.540392
AFUB_063900	4,128,877,228	0.101858	0.0609164	1,672,093,391	0.0945059	0.542082
AFUB_015960	3,161,386,996	-0.148215	0.0887172	-1,670,647,094	0.0947914	0.542437
AFUB_019070	421,366,279	-0.0934281	0.0559201	-1,670,743,761	0.0947723	0.542437
AFUB_083090	2,902,543,782	-0.0523484	0.0313382	-1,670,434,398	0.0948334	0.542437
AFUB_086840	2,718,999,947	0.11222	0.0672739	1,668,100,774	0.0952957	0.544572
AFUB_030510	3,236,434,103	-0.0983307	0.0590184	-1,666,101,159	0.0956933	0.544824
AFUB_051650	481,641,202	-0.088174	0.0529227	-1,666,089,943	0.0956955	0.544824
AFUB_067220	9,050,528,513	-0.294249	0.176599	-1,666,201,619	0.0956733	0.544824
AFUB_084490	713,593,778	0.0724039	0.0434365	1,666,891,779	0.0955359	0.544824
AFUB_053650	4,326,041,609	-0.0926628	0.0556482	-166,515,406	0.095882	0.545119
AFUB_058300	1,084,692,998	0.0688597	0.041378	1,664,160,632	0.0960803	0.545119
AFUB_070490	1,303,126,976	-0.065763	0.0395029	-1,664,765,177	0.0959596	0.545119
AFUB_090580	1,911,250,085	0.0658145	0.0395509	1,664,046,108	0.0961032	0.545119
AFUB_015720	2,547,527,468	-0.110079	0.0661934	-1,662,997,476	0.0963129	0.545403
AFUB_024380	2,306,870,239	0.128067	0.0770142	1,662,904,922	0.0963315	0.545403
AFUB_090820	6,769,738,341	-0.0864389	0.0520392	-1,661,032,461	0.0967069	0.547024
AFUB_058700	1,718,706,037	-0.0593911	0.0357855	-1,659,643,578	0.0969862	0.547592
AFUB_089160	5,700,407,321	-0.0848881	0.0511448	-1,659,761,722	0.0969624	0.547592
AFUB_096310	2,316,634,195	0.119426	0.0720049	165,857,381	0.0972017	0.548304
AFUB_009199	2,749,755,948	-0.111994	0.0676194	-1,656,238,673	0.0976735	0.548319
AFUB_009230	5,440,350,938	0.0941028	0.0568287	1,655,902,931	0.0977415	0.548319
AFUB_010350	3,962,063,303	0.0487803	0.0294515	1,656,293,927	0.0976623	0.548319
AFUB_011360	1,569,640,924	-0.0640956	0.0386834	-1,656,926,814	0.0975343	0.548319
AFUB_032640	7,742,637,925	-0.0756446	0.0456628	-1,656,592,802	0.0976018	0.548319
AFUB_060510	5,431,862,116	-0.0846788	0.0510698	-1,658,101,726	0.0972969	0.548319
AFUB_039470	7,961,674,415	0.0809353	0.0489168	1,654,548,554	0.0980161	0.549287
AFUB_065340	2,706,077,353	0.0640554	0.0387237	1,654,167,793	0.0980934	0.549287
AFUB_064340	9,783,002,551	-0.0728896	0.0440946	-1,653,026,762	0.0983254	0.550084
AFUB_093350	5,868,577,923	0.0824931	0.0499331	1,652,071,663	0.0985199	0.550669
AFUB_026370	124,613,665	0.0630779	0.0382015	1,651,188,285	0.0987001	0.551173
AFUB_098650	3,311,412,944	0.0981031	0.0594425	1,650,385,822	0.098864	0.551586
AFUB_002190	1,678,109,556	-0.0580281	0.0351847	-1,649,241,224	0.0990982	0.552389
AFUB_007310	3,539,373,982	-0.112579	0.0683662	-164,670,334	0.099619	0.554341
AFUB_057500	384,624,883	-0.102046	0.0619717	-1,646,652,956	0.0996294	0.554341
AFUB_072320	7,016,765,522	0.0713903	0.043371	1,646,035,777	0.0997564	0.554544
AFUB_006980	1,626,065,305	-0.0636609	0.0387126	-1,644,446,669	0.100084	0.555846
AFUB_011840	5,037,233,152	0.0883979	0.0537694	1,644,019,864	0.100172	0.555846
AFUB_086980	3,159,917,601	-0.136777	0.0832364	-1,643,234,547	0.100334	0.556243
AFUB_015790	4,576,316,279	-0.110922	0.0675811	-1,641,312,523	0.100733	0.556652
AFUB_041020	7,922,193,304	-0.0774575	0.0471902	-1,641,391,506	0.100716	0.556652
AFUB_063950	812,332,345	-0.118744	0.0723555	-1,641,124,191	0.100772	0.556652
AFUB_084910	2,315,583,307	-0.115974	0.0706652	-1,641,180,388	0.10076	0.556652
AFUB_034790	3,284,585,571	0.0713627	0.0435032	1,640,399,798	0.100922	0.556961
AFUB_087820	2,707,535,844	-0.109253	0.0666188	-1,639,979,454	0.101009	0.556961
AFUB_088340	2,862,039,853	-0.111971	0.0683055	-1,639,269,163	0.101157	0.557274
AFUB_055300	6,434,307,605	0.0752493	0.0459812	1,636,523,075	0.10173	0.559927
AFUB_040500	2,721,648,667	-0.0519862	0.0317933	-1,635,131,174	0.102022	0.560022
AFUB_061310	3,078,856,721	0.0515813	0.0315446	1,635,186,201	0.10201	0.560022
AFUB_089620	443,204,112	0.0881489	0.0539036	1,635,305,982	0.101985	0.560022
AFUB_005880	2,704,744,051	0.107042	0.0654996	1,634,233,664	0.10221	0.560051
AFUB_031470	2,793,507,937	0.11022	0.0674286	1,634,616,608	0.102129	0.560051
AFUB_018400	6,736,800,917	0.0899861	0.0551228	1,632,464,696	0.102582	0.560085
AFUB_024700	595,127,653	0.0838719	0.0513695	1,632,718,716	0.102528	0.560085
AFUB_049520	1,282,959,244	0.0569485	0.0348806	1,632,667,421	0.102539	0.560085
AFUB_077210	8,842,749,805	0.0691312	0.0423343	1,632,980,952	0.102473	0.560085
AFUB_069090	8,736,176,825	-0.0655396	0.0401834	-1,631,010,822	0.102888	0.561257
AFUB_081330	4,476,214,029	0.0935838	0.0573973	1,630,456,228	0.103005	0.561396
AFUB_073610	506,844,346	0.093251	0.0573278	1,626,629,288	0.103816	0.565312
AFUB_009740	4,433,232,435	0.0958326	0.0590397	1,623,187,731	0.104549	0.567059
AFUB_036670	325,389,532	-0.0965743	0.0594758	-1,623,757,645	0.104428	0.567059
AFUB_041830	8,650,450,702	-0.0761013	0.0469156	-1,622,087,594	0.104785	0.567059
AFUB_056180	1,525,629,353	0.0613007	0.0377381	1,624,370,726	0.104297	0.567059
AFUB_057620	3,594,745,948	0.105091	0.0647851	1,622,142,575	0.104773	0.567059
AFUB_060840	1,600,857,187	-0.0539119	0.0332234	-162,270,716	0.104652	0.567059
AFUB_088210	4,660,175,935	0.0980438	0.0603873	1,623,583,409	0.104465	0.567059
AFUB_012060	131,682,556	-0.0680696	0.0420533	-1,618,649,681	0.105523	0.567598
AFUB_014040	3,380,517,721	0.102567	0.0632854	1,620,711,052	0.10508	0.567598
AFUB_023890	6,165,264,225	0.0776447	0.0479633	1,618,834,803	0.105483	0.567598
AFUB_039100	3,187,981,932	0.0974161	0.0601853	161,860,206	0.105533	0.567598
AFUB_041720	1,352,427,238	-0.0587847	0.0363051	-1,619,185,389	0.105407	0.567598
AFUB_064450	1,370,894,458	-0.0517391	0.0319412	-161,982,209	0.105271	0.567598
AFUB_081990	1,126,537,826	0.0594687	0.036706	1,620,138,213	0.105203	0.567598
AFUB_039430	9,025,670,354	0.0763286	0.0471832	1,617,705,322	0.105726	0.568139
AFUB_029040	5,211,557,507	0.0806929	0.0499284	1,616,172,368	0.106057	0.568421
AFUB_079230	558,609,751	0.0763109	0.0472124	1,616,331,898	0.106023	0.568421
AFUB_100100	2,743,691,363	-0.103765	0.0641983	-1,616,312,149	0.106027	0.568421
AFUB_083550	3,052,665,934	-0.111607	0.0691312	-161,441,942	0.106436	0.569956
AFUB_001620	5,628,580,981	-0.0803203	0.0497732	-1,613,726,721	0.106587	0.570262
AFUB_037790	584,856,655	0.077831	0.0483761	160,887,276	0.107644	0.574694
AFUB_057400	2,217,176,379	-0.111637	0.0693984	-1,608,633,268	0.107697	0.574694
AFUB_088280	4,693,129,495	-0.0984304	0.0611704	-1,609,117,452	0.107591	0.574694
AFUB_001440	5,516,205,544	-0.0551403	0.0343273	-1,606,309,827	0.108206	0.576408
AFUB_006820	2,127,899,737	-0.0553092	0.0344248	-1,606,665,879	0.108128	0.576408
AFUB_101460	2,704,770,058	-0.0549818	0.0342482	-1,605,394,649	0.108407	0.576978
AFUB_021810	2,964,547,421	-0.107242	0.0668407	-1,604,448,562	0.108615	0.577584
AFUB_090320	1,651,813,934	-0.0598514	0.0373313	-1,603,248,738	0.10888	0.578489
AFUB_075310	274,724,705	-0.112648	0.0702852	-1,602,726,773	0.108995	0.578599
AFUB_038890	4,098,806,265	-0.0915269	0.0571285	-1,602,123,337	0.109128	0.578805
AFUB_029050	3,582,757,397	-0.0923843	0.0576868	-1,601,479,096	0.109271	0.57906
AFUB_073280	4,069,049,039	0.0972713	0.0608081	1,599,644,594	0.109677	0.580712
AFUB_001650	3,946,846,564	0.0909497	0.0568766	1,599,070,774	0.109805	0.580885
AFUB_024600	5,801,099,817	-0.121574	0.0761011	-1,597,537,538	0.110146	0.582186
AFUB_077230	5,541,473,285	-0.080944	0.0506847	-1,597,009,388	0.110264	0.582306
AFUB_083430	364,936,993	0.0916888	0.0574582	159,574,627	0.110545	0.583292
AFUB_057270	3,062,676,925	-0.12743	0.0798818	-1,595,230,212	0.110661	0.583397
AFUB_088190	3,462,608,127	-0.0734859	0.046119	-1,593,397,111	0.111071	0.585057
AFUB_030470	4,579,701,189	0.0477978	0.0300203	1,592,185,487	0.111343	0.585483
AFUB_075220	4,498,426,548	-0.0925108	0.0581013	-1,592,233,598	0.111332	0.585483
AFUB_052810	3,021,279,515	-0.0425057	0.026725	-159,048,093	0.111726	0.586309
AFUB_058180	6,267,101,295	0.0501978	0.0315668	1,590,210,944	0.111787	0.586309
AFUB_067300	1,447,952,222	0.0528618	0.033228	1,590,881,564	0.111636	0.586309
AFUB_074170	562,419,371	0.0769758	0.0484301	1,589,422,327	0.111965	0.586739
AFUB_078590	3,614,960,586	-0.0585083	0.036824	-1,588,865,166	0.112091	0.586896
AFUB_018130	8,740,912,995	-0.0649968	0.0409252	-1,588,185,739	0.112244	0.587198
AFUB_022370	4,401,816,947	0.053012	0.0334013	1,587,121,534	0.112485	0.587956
AFUB_011410	9,467,018,453	-0.0636685	0.0401363	-158,630,726	0.11267	0.587984
AFUB_065650	3,497,014,496	0.0959127	0.0604958	1,585,442,882	0.112866	0.587984
AFUB_070160	1,344,886,618	0.0532253	0.0335721	1,585,404,581	0.112874	0.587984
AFUB_082760	5,671,788,296	-0.0785821	0.0495627	-1,585,509,844	0.112851	0.587984
AFUB_012900	2,260,189,431	0.0469152	0.0296314	1,583,295,845	0.113354	0.58898
AFUB_059160	665,466,667	-0.0946908	0.0597921	-1,583,667,076	0.11327	0.58898
AFUB_098750	174,949,945	0.0655261	0.0413791	1,583,553,971	0.113295	0.58898
AFUB_030130	2,750,824,125	0.0983967	0.0621688	1,582,734,444	0.113482	0.589145
AFUB_007610	8,655,880,768	0.0619233	0.0391813	1,580,432,146	0.114008	0.590531
AFUB_015280	2,553,534,295	0.107709	0.0681297	1,580,936,785	0.113892	0.590531
AFUB_025810	5,193,237,692	0.0866253	0.0548178	158,024,141	0.114052	0.590531
AFUB_078200	1,286,159,811	-0.0563827	0.035688	-1,579,878,665	0.114135	0.590531
AFUB_011670	2,281,277,269	-0.114359	0.0725493	-157,629,432	0.114958	0.59074
AFUB_012120	1,000,499,192	0.0619678	0.0392751	1,577,789,016	0.114614	0.59074
AFUB_013410	4,980,284,206	0.0769346	0.048821	1,575,849,789	0.11506	0.59074
AFUB_020840	3,212,365,738	-0.0950358	0.0602464	-1,577,452,106	0.114692	0.59074
AFUB_024420	1,103,904,866	0.0616958	0.0391455	15,760,645	0.115011	0.59074
AFUB_041410	5,800,952,602	0.0766623	0.0485516	1,578,985,284	0.114339	0.59074
AFUB_055860	1,707,039,378	-0.048212	0.0305623	-1,577,502,793	0.11468	0.59074
AFUB_057200	6,022,481,049	0.0694117	0.0439758	1,578,406,611	0.114472	0.59074
AFUB_069440	7,261,616,553	0.0755716	0.0479665	1,575,507,302	0.115139	0.59074
AFUB_099010	5,860,456,458	-0.0719709	0.0456579	-1,576,309,099	0.114955	0.59074
AFUB_002040	1,009,670,123	0.0582544	0.0370378	1,572,839,704	0.115756	0.591675
AFUB_011860	1,160,059,892	-0.0585996	0.0372287	-1,574,042,512	0.115478	0.591675
AFUB_039050	1,054,425,272	-0.0667708	0.042458	-1,572,629,758	0.115805	0.591675
AFUB_055920	1,218,030,206	0.0647507	0.041152	1,573,452,927	0.115614	0.591675
AFUB_056420	6,948,227,061	-0.0816871	0.0519204	-1,573,312,657	0.115646	0.591675
AFUB_088050	1,220,265,918	-0.060324	0.0383743	-1,571,991,117	0.115953	0.591938
AFUB_043370	5,590,736,638	0.0778704	0.0495541	1,571,423,198	0.116084	0.592117
AFUB_100410	2,383,908,761	-0.1084	0.0691426	-156,777,166	0.116934	0.595957
AFUB_030250	2,213,602,151	0.0647299	0.0412991	156,734,356	0.117034	0.595971
AFUB_058870	3,089,044,986	-0.102459	0.0653972	-1,566,720,243	0.11718	0.596217
AFUB_006230	1,046,362,237	0.0680075	0.0434458	1,565,339,642	0.117503	0.597365
AFUB_018850	9,727,612,247	-0.0739108	0.0472345	-1,564,760,692	0.117639	0.597559
AFUB_005440	180,155,692,240,877	-0.0574519	0.0368369	-1,559,629,174	0.118848	0.597704
AFUB_024400	805,319,028	0.0661697	0.0423641	1,561,928,075	0.118305	0.597704
AFUB_026470	2,564,214,057	0.117849	0.0755883	1,559,097,078	0.118973	0.597704
AFUB_026530	1,196,471,153	-0.0662514	0.0423883	-1,562,964,705	0.118061	0.597704
AFUB_027990	6,031,793,313	0.0764363	0.0489745	1,560,737,135	0.118586	0.597704
AFUB_028940	4,936,803,897	-0.0841614	0.0539757	-1,559,245,046	0.118938	0.597704
AFUB_035750	3,457,799,328	-0.0943881	0.0604792	-1,560,669,654	0.118602	0.597704
AFUB_038290	1,912,708,593	-0.0625038	0.0400967	-1,558,827,792	0.119037	0.597704
AFUB_041240	5,721,690,976	0.0433917	0.0278056	1,560,538,074	0.118633	0.597704
AFUB_056300	2,172,500,049	0.0592046	0.0378755	1,563,135,867	0.118021	0.597704
AFUB_058590	8,477,840,181	-0.0742191	0.0475649	-1,560,374,795	0.118671	0.597704
AFUB_058820	1,347,631,378	0.0683029	0.043828	1,558,431,836	0.119131	0.597704
AFUB_064370	8,659,107,635	-0.0843827	0.054108	-1,559,525,154	0.118872	0.597704
AFUB_076390	3,425,313,916	-0.0937757	0.0600569	-1,561,447,934	0.118418	0.597704
AFUB_089440	3,170,815,367	0.107761	0.0691263	1,558,906,198	0.119019	0.597704
AFUB_035440	2,289,730,963	-0.123046	0.0789895	-1,557,755,969	0.119291	0.597733
AFUB_043260	1,266,374,181	-0.0875817	0.0562292	-1,557,584,155	0.119332	0.597733
AFUB_024020	7,570,913,379	-0.0781779	0.0502626	-1,555,389,655	0.119853	0.599854
AFUB_015130	1,778,299,137	0.0671143	0.0432504	1,551,763,333	0.120719	0.600321
AFUB_020260	2,541,859,021	-0.155973	0.100418	-1,553,235,179	0.120367	0.600321
AFUB_020950	1,457,811,831	-0.0525784	0.0338841	-1,551,714,159	0.120731	0.600321
AFUB_026590	1,318,164,016	-0.0617378	0.0397421	-1,553,461,961	0.120313	0.600321
AFUB_027510	5,932,737,011	0.0765499	0.049322	1,552,042,293	0.120652	0.600321
AFUB_035040	399,098,473	0.0865114	0.0557379	1,552,110,769	0.120636	0.600321
AFUB_044280	5,420,733,892	-0.0845252	0.0543719	-155,457,559	0.120047	0.600321
AFUB_096420	3,326,395,365	0.149882	0.0965619	1,552,186,589	0.120618	0.600321
AFUB_007420	4,582,109,355	0.0980449	0.0632375	1,550,423,009	0.12104	0.600884
AFUB_032340	2,924,810,889	0.0932427	0.0601352	155,055,145	0.121009	0.600884
AFUB_078940	3,058,689,912	0.0962883	0.0621271	154,986,054	0.121175	0.601067
AFUB_004960	7,457,667,243	-0.0807055	0.0521503	-154,755,754	0.121729	0.602101
AFUB_012970	1,712,792,127	0.0630728	0.0407639	1,547,270,752	0.121798	0.602101
AFUB_028600	1,868,715,429	0.0513886	0.0332161	1,547,096,864	0.12184	0.602101
AFUB_065550	2,395,970,106	-0.131815	0.0852093	-1,546,952,269	0.121875	0.602101
AFUB_072840	7,617,914,604	0.067405	0.0435459	1,547,908,247	0.121644	0.602101
AFUB_027400	3,460,365,644	-0.0960595	0.0622063	-1,544,209,812	0.122538	0.603428
AFUB_065060	2,917,426,356	-0.118864	0.0769609	-1,544,476,272	0.122473	0.603428
AFUB_084800	5,792,781,537	-0.077293	0.0500263	-1,545,046,719	0.122335	0.603428
AFUB_090430	2,689,294,994	-0.105201	0.0681015	-1,544,769,878	0.122402	0.603428
AFUB_012230	9,838,234,579	0.0584366	0.0378578	1,543,579,641	0.12269	0.603535
AFUB_067430	708,294,645	-0.0794174	0.0514592	-1,543,307,491	0.122756	0.603535
AFUB_060930	3,901,959,672	-0.0963406	0.0624593	-1,542,454,207	0.122963	0.604068
AFUB_088570	2,242,361,891	-0.114426	0.0742212	-1,541,694,728	0.123148	0.60449
AFUB_068750	1,215,425,185	-0.0583163	0.0378868	-1,539,225,642	0.123749	0.605348
AFUB_069210	2,809,305,269	0.100366	0.0651811	1,539,807,738	0.123607	0.605348
AFUB_074950	4,769,704,378	0.0820424	0.053282	1,539,776,981	0.123615	0.605348
AFUB_082060	7,892,073,852	0.0661645	0.0429765	1,539,553,102	0.123669	0.605348
AFUB_084900	5,302,438,248	-0.0533531	0.0346685	-1,538,949,384	0.123817	0.605348
AFUB_051620	3,871,025,074	-0.0964697	0.0627111	-1,538,318,181	0.123971	0.605618
AFUB_059370	1,846,823,518	-0.0534286	0.0347622	-1,536,975,518	0.124299	0.606739
AFUB_024090	2,743,442,666	-0.0518534	0.0337597	-1,535,953,387	0.12455	0.606995
AFUB_069650	790,646,014	-0.0743087	0.0483737	-1,536,137,981	0.124505	0.606995
AFUB_011190	5,296,839,493	0.0749157	0.0488024	1,535,082,083	0.124764	0.607183
AFUB_036930	203,034,625	0.0526865	0.0343257	153,490,096	0.124808	0.607183
AFUB_037340	1,714,622,271	0.0649907	0.0423507	1,534,584,828	0.124886	0.607183
AFUB_005460	4,008,528,336	-0.0865234	0.0569255	-1,519,941,558	0.128526	0.607354
AFUB_009350	2,643,517,187	-0.0980005	0.0639798	-1,531,742,938	0.125586	0.607354
AFUB_011230	3,502,568,165	-0.0887723	0.0583357	-1,521,748,254	0.128072	0.607354
AFUB_012950	231,058,471	-0.100762	0.0661901	-1,522,314,392	0.12793	0.607354
AFUB_014460	1,256,166,104	0.0565224	0.0371156	1,522,877,163	0.127789	0.607354
AFUB_016680	3,284,014,402	0.0920562	0.0603052	1,526,505,725	0.126884	0.607354
AFUB_020070	1,000,098,492	0.0526805	0.0345079	1,526,618,689	0.126856	0.607354
AFUB_021360	1,038,338,367	-0.0664543	0.0435649	-1,525,408,614	0.127157	0.607354
AFUB_022380	8,203,910,121	0.0698581	0.0458676	1,523,039,947	0.127749	0.607354
AFUB_022640	1,551,698,838	-0.156318	0.102663	-1,522,638,343	0.127849	0.607354
AFUB_022930	4,988,026,147	0.07402	0.0484178	1,528,777,565	0.12632	0.607354
AFUB_023710	3,744,907,762	0.0659646	0.0432264	1,526,026,208	0.127003	0.607354
AFUB_027210	3,415,396,345	-0.102094	0.066941	-1,525,129,514	0.127227	0.607354
AFUB_032750	3,447,552,133	-0.0979588	0.063993	-1,530,774,822	0.125825	0.607354
AFUB_034720	9,861,683,211	0.0598709	0.0390503	1,533,175,877	0.125233	0.607354
AFUB_034960	2,746,383,679	0.0971455	0.0638102	1,522,413,591	0.127905	0.607354
AFUB_035650	3,605,283,779	-0.232479	0.152196	-1,527,499,076	0.126637	0.607354
AFUB_036360	6,199,142,343	0.0675226	0.0444237	1,519,968,521	0.128519	0.607354
AFUB_036480	1,018,853,759	0.0604408	0.0397531	1,520,404,895	0.128409	0.607354
AFUB_037760	1,426,132,403	0.0584803	0.0384616	1,520,487,042	0.128389	0.607354
AFUB_038370	4,348,193,594	-0.0545458	0.0358045	-1,523,434,826	0.12765	0.607354
AFUB_039530	616,151,397	0.0793853	0.0522282	1,519,971,564	0.128518	0.607354
AFUB_042430	2,464,043,894	-0.100762	0.0660202	-1,526,230,279	0.126953	0.607354
AFUB_044350	2,551,346,013	0.103878	0.0683726	1,519,294,286	0.128688	0.607354
AFUB_047300	1,093,148,112	-0.0571689	0.0373863	-1,529,137,788	0.12623	0.607354
AFUB_055050	4,824,906,425	-0.10764	0.0706826	-1,522,868,834	0.127792	0.607354
AFUB_059770	2,937,003,221	0.0558457	0.0364679	1,531,366,062	0.125679	0.607354
AFUB_059790	3,079,834,622	0.0932996	0.0613995	1,519,550,481	0.128624	0.607354
AFUB_060830	705,208,575	-0.0707861	0.0461812	-1,532,790,973	0.125327	0.607354
AFUB_065700	1,143,264,268	-0.0572606	0.0374978	-1,527,038,671	0.126751	0.607354
AFUB_071080	746,165,816	-0.0836602	0.0547533	-1,527,946,727	0.126526	0.607354
AFUB_078520	2,598,433,049	-0.133077	0.0875621	-1,519,800,812	0.128561	0.607354
AFUB_080320	9,236,429,103	0.0695365	0.0456337	1,523,797,286	0.127559	0.607354
AFUB_081220	3,840,464,953	0.0971649	0.0639095	152,035,151	0.128423	0.607354
AFUB_083790	4,469,423,127	0.0934671	0.0613323	1,523,946,369	0.127522	0.607354
AFUB_085360	3,699,473,694	0.0923388	0.0604055	1,528,647,443	0.126352	0.607354
AFUB_088080	1,431,330,036	0.0518324	0.0339786	1,525,444,293	0.127148	0.607354
AFUB_095970	5,575,333,294	0.0886067	0.0580213	1,527,140,757	0.126726	0.607354
AFUB_008450	9,855,074,783	-0.0394696	0.0260642	-1,514,326,194	0.129943	0.607649
AFUB_013280	2,322,983,932	-0.111496	0.0736025	-1,514,837,407	0.129814	0.607649
AFUB_013630	9,750,720,528	-0.0425507	0.0280274	-1,518,180,649	0.128969	0.607649
AFUB_019320	1,006,012,726	0.0615642	0.0406625	1,514,030,759	0.130018	0.607649
AFUB_051740	9,745,344,213	0.0576209	0.0379796	1,517,153,644	0.129228	0.607649
AFUB_053570	2,902,671,826	-0.137367	0.0907298	-1,514,022,739	0.13002	0.607649
AFUB_058170	1,143,117,373	0.0506688	0.0334414	151,514,938	0.129735	0.607649
AFUB_058830	66,110,428	-0.08066	0.0532637	-151,435,313	0.129936	0.607649
AFUB_064240	3,971,634,998	0.0497835	0.0327815	1,518,646,132	0.128852	0.607649
AFUB_071180	1,972,600,707	0.0542513	0.035791	1,515,780,035	0.129575	0.607649
AFUB_071380	8,301,438,221	0.0877698	0.0578896	151,615,798	0.129479	0.607649
AFUB_079130	2,510,617,079	-0.103239	0.068111	-1,515,741,818	0.129585	0.607649
AFUB_080590	4,797,571,473	0.0803137	0.0530494	1,513,942,749	0.13004	0.607649
AFUB_014590	1,090,676,411	-0.0549571	0.036329	-1,512,759,785	0.130341	0.608175
AFUB_026340	557,797,028	-0.0848304	0.0561498	-1,510,786,234	0.130843	0.608175
AFUB_038510	6,638,564,195	0.0697862	0.0461835	1,511,062,566	0.130773	0.608175
AFUB_043320	2,206,590,997	-0.10817	0.0715596	-1,511,602,079	0.130635	0.608175
AFUB_050840	6,493,518,338	-0.0790236	0.0522437	-1,512,596,856	0.130382	0.608175
AFUB_050980	1,283,776,133	-0.0565216	0.037389	-1,511,715,108	0.130606	0.608175
AFUB_051460	6,137,226,429	-0.0715732	0.0473838	-1,510,500,653	0.130916	0.608175
AFUB_070010	3,397,406,245	0.0408841	0.0270688	1,510,377,341	0.130947	0.608175
AFUB_056330	3,870,828,107	-0.111503	0.0738515	-1,509,831,866	0.131086	0.60836
AFUB_012870	3,532,313,929	-0.0843465	0.0559181	-1,508,394,355	0.131454	0.609603
AFUB_006220	1,182,447,225	0.0582662	0.0386989	150,562,735	0.132163	0.61058
AFUB_009980	7,488,137,478	-0.0651562	0.0432556	-1,506,305,394	0.131989	0.61058
AFUB_013500	2,651,031,961	-0.0991808	0.0659205	-1,504,552,027	0.132439	0.61058
AFUB_041320	1,719,108,643	-0.0569742	0.0378449	-1,505,464,357	0.132205	0.61058
AFUB_043600	9,290,343,407	0.0699948	0.0465449	1,503,812,552	0.13263	0.61058
AFUB_043790	2,238,618,163	-0.113206	0.0752755	-1,503,894,492	0.132609	0.61058
AFUB_052390	489,305,916	-0.0853202	0.0566316	-1,506,582,255	0.131918	0.61058
AFUB_058400	6,326,678,097	0.0689869	0.0458784	1,503,690,593	0.132661	0.61058
AFUB_060590	3,269,649,244	-0.0842165	0.0559871	-1,504,212,452	0.132527	0.61058
AFUB_072050	7,685,798,721	-0.203016	0.135002	-1,503,795,384	0.132634	0.61058
AFUB_096810	5,990,524,639	0.0768354	0.0511122	150,327,007	0.132769	0.61062
AFUB_064480	9,600,058,896	0.0582246	0.0387549	1,502,380,692	0.132999	0.611216
AFUB_011350	5,228,323,941	-0.0783538	0.0521681	-1,501,947,733	0.133111	0.611242
AFUB_059900	8,201,592,336	-0.0733948	0.0488782	-1,501,586,011	0.133204	0.611242
AFUB_043020	2,400,877,493	0.0516383	0.0344103	1,500,664,546	0.133442	0.611631
AFUB_070570	119,326,208	-0.0860816	0.0573692	-1,500,485,942	0.133489	0.611631
AFUB_011820	1,271,386,144	0.0570172	0.0380486	1,498,535,753	0.133994	0.613152
AFUB_082360	2,194,292,181	-0.0497927	0.0332298	-1,498,433,205	0.134021	0.613152
AFUB_053670	2,756,184,151	-0.105688	0.0706297	-1,496,364,028	0.134559	0.614696
AFUB_085750	1,671,808,437	-0.0803755	0.0537023	-1,496,686,774	0.134475	0.614696
AFUB_011340	350,714,504	-0.0873278	0.058429	-1,494,597,801	0.135019	0.615882
AFUB_011530	774,002,016	-0.0632375	0.0423074	-1,494,714,429	0.134989	0.615882
AFUB_004350	1,559,302,985	0.0696141	0.0466189	1,493,260,133	0.135369	0.617017
AFUB_050970	2,909,012,646	-0.0971676	0.065126	-1,491,994,014	0.135701	0.618069
AFUB_051130	270,680,838	-0.0976377	0.0654773	-1,491,168,367	0.135917	0.618595
AFUB_022740	224,677,834	0.101858	0.0683724	1,489,748,449	0.13629	0.619833
AFUB_014300	3,339,646,435	0.0861114	0.0578184	1,489,341,089	0.136398	0.61986
AFUB_017800	1,195,846,689	0.0354378	0.0238011	1,488,915,529	0.13651	0.619909
AFUB_054070	4,864,398,555	-0.0784155	0.0526938	-1,488,134,554	0.136715	0.619925
AFUB_091750	232,888,336	-0.124736	0.0838033	-1,488,432,979	0.136637	0.619925
AFUB_052670	1,256,378,399	0.0581508	0.0391095	1,486,869,877	0.137049	0.620267
AFUB_073120	1,840,063,821	-0.054927	0.0369456	-1,486,697,913	0.137095	0.620267
AFUB_073640	464,986,995	0.0821291	0.0552204	1,487,295,981	0.136937	0.620267
AFUB_027290	5,760,134,125	-0.053074	0.0357375	-148,510,407	0.137516	0.621716
AFUB_011370	3,722,201,856	0.0821949	0.0553872	1,484,005,811	0.137807	0.622505
AFUB_098980	2,374,732,694	-0.100236	0.0675589	-1,483,678,654	0.137894	0.622505
AFUB_083970	6,248,395,384	-0.110574	0.0745685	-1,482,849,515	0.138114	0.62304
AFUB_006610	5,686,463,565	-0.0740579	0.0500127	-1,480,781,169	0.138665	0.623717
AFUB_014920	5,933,858,198	0.0772208	0.0521857	1,479,732,439	0.138945	0.623717
AFUB_025570	8,020,105,704	-0.0650313	0.0439096	-1,481,026,956	0.138599	0.623717
AFUB_026600	7,177,739,477	0.070454	0.0475508	1,481,657,444	0.138431	0.623717
AFUB_030700	368,724,738,356	0.0955119	0.0645353	1,479,995,254	0.138875	0.623717
AFUB_040030	2,509,698,566	-0.0961397	0.0649763	-1,479,610,797	0.138977	0.623717
AFUB_053370	1,004,677,255	0.0550568	0.0371865	1,480,559,839	0.138724	0.623717
AFUB_040810	70,970,757	0.0706957	0.0478072	1,478,765,606	0.139203	0.624273
AFUB_014730	6,492,320,114	0.0856583	0.0579666	1,477,718,983	0.139483	0.624516
AFUB_022070	2,900,268,912	0.0916355	0.0620719	1,476,280,101	0.139869	0.624516
AFUB_023080	1,029,263,035	0.0727575	0.0492794	1,476,428,685	0.139829	0.624516
AFUB_024590	1,254,740,292	-0.0597244	0.0404417	-1,476,804,852	0.139728	0.624516
AFUB_036570	7,336,141,006	0.072449	0.049028	1,477,705,771	0.139487	0.624516
AFUB_087060	5,381,287,895	-0.0879109	0.0595391	-1,476,522,983	0.139804	0.624516
AFUB_083220	8,473,520,567	0.072298	0.0490015	1,475,424,159	0.140099	0.625086
AFUB_027690	843,502,172	0.0626765	0.0424967	147,485,705	0.140251	0.625266
AFUB_028090	2,522,793,551	0.0432171	0.0293094	1,474,514,928	0.140343	0.625266
AFUB_018890	9,445,735,861	0.0657264	0.0446355	1,472,513,574	0.140882	0.627213
AFUB_020150	7,127,320,901	-0.0714975	0.0485889	-1,471,480,021	0.141161	0.627519
AFUB_030020	4,567,076,071	0.0769012	0.0522739	1,471,120,828	0.141258	0.627519
AFUB_064760	5,252,830,282	-0.0722915	0.0491297	-1,471,441,746	0.141172	0.627519
AFUB_018120	1,505,140,695	0.0645603	0.0438994	1,470,643,662	0.141388	0.627638
AFUB_039440	1,114,683,705	-0.0675135	0.0459346	-1,469,772,339	0.141623	0.62823
AFUB_001250	1,254,228,646	-0.0756128	0.0515716	-1,466,170,254	0.142602	0.630144
AFUB_003510	1,500,581,875	0.0591964	0.0403837	1,465,848,244	0.14269	0.630144
AFUB_004530	2,268,640,839	-0.0523626	0.0357513	-1,464,635,061	0.143021	0.630144
AFUB_006100	2,628,796,289	0.0973783	0.0666028	1,462,074,235	0.143721	0.630144
AFUB_009780	2,650,506,359	-0.0539901	0.0368686	-1,464,391,316	0.143087	0.630144
AFUB_010920	776,777,031	-0.0718566	0.0489698	-146,736,631	0.142276	0.630144
AFUB_029180	800,605,098	-0.0624048	0.0426431	-1,463,421,745	0.143352	0.630144
AFUB_041230	4,410,710,936	-0.0573461	0.0392271	-1,461,899,212	0.143769	0.630144
AFUB_042180	4,083,122,661	0.0789558	0.0540025	1,462,077,311	0.14372	0.630144
AFUB_042730	3,999,646,609	0.0408499	0.0278541	1,466,567,327	0.142494	0.630144
AFUB_055140	3,402,191,781	-0.0653118	0.0446712	-1,462,058,018	0.143725	0.630144
AFUB_056170	8,158,471,722	0.059083	0.0403108	1,465,687,167	0.142734	0.630144
AFUB_058710	2,271,873,641	0.0484285	0.0330545	1,465,112,513	0.14289	0.630144
AFUB_073050	5,093,522,616	0.0750102	0.0513146	1,461,772,319	0.143804	0.630144
AFUB_073350	8,536,517,628	0.0620658	0.0424312	1,462,741,236	0.143538	0.630144
AFUB_078390	8,559,347,208	0.0634889	0.0433018	1,466,195,334	0.142595	0.630144
AFUB_095550	9,082,740,445	-0.0416078	0.0284098	-1,464,558,916	0.143041	0.630144
AFUB_007300	7,122,583,236	0.064938	0.0444413	1,461,208,838	0.143958	0.63037
AFUB_029520	6,604,662,641	0.0683481	0.046866	1,458,373,654	0.144738	0.631976
AFUB_035200	4,889,107,927	-0.0723886	0.0496178	-1,458,923,272	0.144586	0.631976
AFUB_054140	3,732,888,505	-0.0903489	0.061905	-145,947,709	0.144434	0.631976
AFUB_094810	4,296,789,675	-0.0934606	0.0640787	-1,458,528,438	0.144695	0.631976
AFUB_040370	4,357,046,717	-0.0807534	0.0554344	-1,456,736,826	0.145189	0.633118
AFUB_055790	1,278,358,055	0.0550151	0.0377676	1,456,675,742	0.145206	0.633118
AFUB_027010	4,630,183,803	-0.0969406	0.0665799	-1,456,003,893	0.145392	0.63342
AFUB_060110	3,566,171,998	-0.0864061	0.059358	-1,455,677,085	0.145482	0.63342
AFUB_042740	9,929,473,535	-0.065644	0.045111	-145,516,734	0.145623	0.633584
AFUB_073960	2,500,714,421	-0.108524	0.0746441	-1,453,882,432	0.145979	0.634682
AFUB_032500	1,755,507,954	0.0523391	0.0360373	145,236,114	0.146401	0.635685
AFUB_064800	1,936,949,175	0.0514221	0.0354072	1,452,303,408	0.146417	0.635685
AFUB_016240	1,085,422,573	-0.0580456	0.0400401	-1,449,685,871	0.147146	0.636633
AFUB_036260	5,441,670,445	-0.239035	0.164983	-144,884,174	0.147382	0.636633
AFUB_040340	7,640,466,918	-0.0658102	0.0454023	-1,449,492,106	0.1472	0.636633
AFUB_040640	1,883,021,959	-0.0460711	0.0318135	-1,448,164,899	0.147571	0.636633
AFUB_059720	835,484,415	0.0635973	0.0438979	144,875,575	0.147406	0.636633
AFUB_089400	2,235,528,771	0.0513978	0.0354502	1,449,859,732	0.147098	0.636633
AFUB_089780	3,512,117,109	0.0860074	0.0592697	1,451,119,717	0.146747	0.636633
AFUB_091580	1,408,391,593	-0.0701256	0.0484185	-1,448,324,205	0.147526	0.636633
AFUB_093190	3,097,638,314	-0.0416225	0.0287254	-1,448,978,131	0.147344	0.636633
AFUB_058660	3,339,962,837	-0.0892783	0.0616796	-1,447,451,497	0.147771	0.637046
AFUB_004550	6,213,127,375	-0.0479599	0.033174	-1,445,708,961	0.148259	0.637736
AFUB_016100	4,138,572,503	0.0797664	0.0551478	1,446,411,701	0.148062	0.637736
AFUB_033010	3,587,148,603	-0.0899864	0.0622459	-1,445,659,591	0.148273	0.637736
AFUB_042570	4,358,527,992	-0.0742657	0.0513941	-1,445,023,705	0.148451	0.637736
AFUB_093140	7,537,695,668	0.0679047	0.0469903	1,445,079,342	0.148436	0.637736
AFUB_009410	1,544,837,415	-0.0500848	0.0347098	-1,442,961,343	0.149031	0.638885
AFUB_012710	286,662,505	0.0928836	0.0643587	1,443,217,633	0.148959	0.638885
AFUB_015360	5,961,066,179	0.0764173	0.0529522	1,443,138,307	0.148982	0.638885
AFUB_001220	7,842,446,598	-0.0975551	0.0677173	-1,440,622,366	0.149691	0.640075
AFUB_004980	1,573,864,286	-0.0584564	0.0405847	-1,440,355,884	0.149767	0.640075
AFUB_009540	4,042,165,401	-0.0442512	0.0307034	-1,441,245,022	0.149515	0.640075
AFUB_038450	4,156,248,723	0.0801497	0.0557103	1,438,686,521	0.150239	0.640075
AFUB_063140	10,230,073	0.0623067	0.0432859	1,439,423,116	0.150031	0.640075
AFUB_076170	7,527,654,093	0.0628503	0.0436686	1,439,254,324	0.150078	0.640075
AFUB_078360	6,114,418,875	0.0671557	0.0466424	1,439,798,335	0.149924	0.640075
AFUB_089700	8,724,711,976	-0.0648242	0.0449828	-1,441,090,592	0.149559	0.640075
AFUB_092030	2,730,565,182	-0.0981104	0.0682119	-1,438,317,759	0.150344	0.640075
AFUB_092690	4,258,474,396	0.050539	0.0351384	1,438,282,991	0.150354	0.640075
AFUB_010620	773,967,883	-0.0524087	0.0364625	-1,437,329,092	0.150625	0.640782
AFUB_023930	4,935,552,904	-0.107103	0.0745576	-143,651,237	0.150857	0.641053
AFUB_064330	6,207,146,024	-0.0670722	0.0466957	-1,436,368,335	0.150898	0.641053
AFUB_012890	1,897,284,467	-0.0527237	0.0367741	-1,433,718,172	0.151653	0.643815
AFUB_082600	2,204,247,439	0.0484867	0.0338328	1,433,127,709	0.151821	0.644084
AFUB_005570	4,019,578,881	0.0774187	0.0540497	1,432,359,723	0.152041	0.644123
AFUB_057100	3,875,518,794	0.0803135	0.0560653	1,432,499,691	0.152001	0.644123
AFUB_082130	4,367,812,457	-0.107521	0.0750975	-143,175,545	0.152214	0.64441
AFUB_063840	1,292,213,994	0.0525402	0.0367095	1,431,243,054	0.152361	0.644586
AFUB_068800	2,602,932,192	-0.0998519	0.0697898	-1,430,752,532	0.152501	0.644736
AFUB_037230	3,730,067,476	-0.0525374	0.036736	-1,430,136,272	0.152678	0.645038
AFUB_002060	2,257,963,452	0.0487962	0.0341432	1,429,163,779	0.152957	0.645337
AFUB_005010	4,643,443,354	-0.0728072	0.0509442	-1,429,155,638	0.15296	0.645337
AFUB_067390	1,848,198,493	-0.0462593	0.0323777	-1,428,740,373	0.153079	0.645397
AFUB_014520	429,421,391	0.0792792	0.0555196	1,427,949,733	0.153306	0.645467
AFUB_024470	1,017,492,903	-0.0430124	0.0301146	-1,428,292,403	0.153208	0.645467
AFUB_007330	5,097,584,442	-0.0697138	0.0488567	-1,426,905,113	0.153607	0.645598
AFUB_009260	1,611,954,043	0.0491092	0.0344064	1,427,327,307	0.153486	0.645598
AFUB_073220	9,263,416,078	-0.0703429	0.0493031	-1,426,744,001	0.153654	0.645598
AFUB_000120	6,154,809,439	0.0698122	0.0490081	1,424,501,345	0.154301	0.647432
AFUB_026390	1,772,391,472	0.060195	0.0422536	1,424,609,835	0.15427	0.647432
AFUB_060050	3,170,557,937	-0.0428945	0.0301216	-142,404,742	0.154433	0.647539
AFUB_056250	6,604,765,453	0.0678794	0.0476909	1,423,318,242	0.154644	0.647915
AFUB_074920	2,120,389,522	-0.0498748	0.0350546	-1,422,775,537	0.154801	0.647915
AFUB_101150	1,191,426,138	-0.0501444	0.0352473	-1,422,643,053	0.15484	0.647915
AFUB_011430	5,083,349,228	0.0723758	0.0509423	142,074,053	0.155392	0.649041
AFUB_065350	2,227,541,877	-0.0464927	0.0327103	-142,134,763	0.155216	0.649041
AFUB_067360	5,826,014,289	-0.0728008	0.0512457	-1,420,622,696	0.155426	0.649041
AFUB_043270	1,538,764,625	-0.0481916	0.0339319	-1,420,245,509	0.155536	0.649056
AFUB_012150	4,850,198,152	0.0726446	0.0512046	1,418,712,806	0.155983	0.649212
AFUB_074760	427,951,268	-0.0811745	0.057219	-1,418,662,948	0.155997	0.649212
AFUB_090940	1,374,693,082	-0.0497132	0.0350385	-1,418,814,444	0.155953	0.649212
AFUB_098960	7,910,004,967	0.0669242	0.0471523	1,419,320,879	0.155805	0.649212
AFUB_004970	7,627,560,724	-0.0385215	0.0271836	-1,417,085,161	0.156458	0.649381
AFUB_013150	4,994,962,743	-0.0782752	0.0552339	-1,417,157,624	0.156437	0.649381
AFUB_035130	3,211,703,827	-0.0916954	0.0647669	-1,415,775,837	0.156841	0.649381
AFUB_039560	229,577,623	0.0988026	0.0697944	1,415,622,539	0.156886	0.649381
AFUB_040660	1,727,239,015	0.0544729	0.0384255	1,417,623,384	0.156301	0.649381
AFUB_061540	6,595,625,439	0.0682864	0.0482197	1,416,152,385	0.156731	0.649381
AFUB_089370	1,671,549,621	0.051196	0.0361629	1,415,705,006	0.156862	0.649381
AFUB_097430	3,175,270,399	0.0887614	0.0626768	141,617,614	0.156724	0.649381
AFUB_026210	1,520,370,714	0.069575	0.049192	1,414,354,811	0.157258	0.650041
AFUB_057450	7,480,548,031	0.0733219	0.0518365	1,414,484,147	0.15722	0.650041
AFUB_015490	1,614,281,348	-0.0480396	0.0340284	-1,411,751,234	0.158023	0.650308
AFUB_023680	3,281,211,734	-0.0896978	0.0636728	-1,408,730,895	0.158915	0.650308
AFUB_027560	6,143,274,098	-0.0692734	0.0491595	-1,409,154,864	0.158789	0.650308
AFUB_036380	8,468,193,216	0.0389341	0.0275731	1,412,030,921	0.157941	0.650308
AFUB_038860	5,396,806,587	-0.0753221	0.0534061	-1,410,365,973	0.158432	0.650308
AFUB_041250	2,434,299,956	0.0435631	0.0308621	1,411,540,124	0.158085	0.650308
AFUB_051360	7,814,287,711	0.0803578	0.0570294	1,409,059,477	0.158818	0.650308
AFUB_064510	4,726,646,604	-0.0773974	0.0549389	-1,408,788,814	0.158898	0.650308
AFUB_067260	3,192,197,296	-0.117709	0.0833607	-1,412,048,631	0.157936	0.650308
AFUB_067520	2,451,964,909	0.040806	0.0289182	1,411,082,231	0.15822	0.650308
AFUB_078310	5,380,389,806	0.0665498	0.047177	1,410,640,857	0.158351	0.650308
AFUB_084240	6,027,324,562	-0.0631782	0.044722	-1,412,688,186	0.157747	0.650308
AFUB_088470	465,357,732	-0.0723249	0.0512863	-1,410,217,394	0.158476	0.650308
AFUB_093710	1,425,322,705	0.0692851	0.0491016	1,411,056,893	0.158228	0.650308
AFUB_098320	2,907,056,909	0.0457086	0.0324404	1,409,001,274	0.158835	0.650308
AFUB_051010	7,133,856,391	0.0702131	0.049865	1,408,065,089	0.159112	0.65068
AFUB_000990	8,975,107,515	0.065301	0.0465068	1,404,117,658	0.160284	0.651561
AFUB_022830	1,923,076,238	-0.0454562	0.0323444	-140,538,348	0.159907	0.651561
AFUB_027000	311,144,774	-0.0854172	0.060819	-1,404,450,117	0.160185	0.651561
AFUB_043660	133,398,094,167,779	-0.030254	0.0215131	-1,406,303,693	0.159634	0.651561
AFUB_059860	8,831,094,093	0.0551814	0.0393047	1,403,937,566	0.160337	0.651561
AFUB_068870	3,031,543,555	0.101136	0.072037	1,403,944,118	0.160335	0.651561
AFUB_071569	5,694,016,452	0.0762415	0.0542366	1,405,720,951	0.159807	0.651561
AFUB_091060	3,945,749,259	-0.0833422	0.0592384	-1,406,896,088	0.159458	0.651561
AFUB_099240	4,763,155,747	0.0722203	0.0514023	1,405,000,734	0.160021	0.651561
AFUB_100400	2,818,108,246	0.0963614	0.0686453	1,403,758,409	0.160391	0.651561
AFUB_019010	1,385,090,777	-0.0481857	0.0344396	-1,399,137,119	0.161772	0.656736
AFUB_005090	6,269,028,515	-0.0768759	0.0549895	-1,398,009,553	0.16211	0.656893
AFUB_025400	1,487,527,082	-0.0551822	0.0394727	-1,397,985,515	0.162117	0.656893
AFUB_029410	8,057,766,512	0.0612243	0.0438074	1,397,579,099	0.162239	0.656893
AFUB_043200	8,792,179,929	0.0666805	0.0477068	1,397,716,435	0.162198	0.656893
AFUB_037640	2,520,193,742	-0.0961463	0.0688938	-1,395,573,326	0.162843	0.658581
AFUB_079090	4,933,005,825	-0.073451	0.0526349	-1,395,478,867	0.162871	0.658581
AFUB_019830	1,143,252,497	-0.0550759	0.0394959	-1,394,470,054	0.163176	0.658823
AFUB_023360	3,686,548	-0.0788071	0.056504	-1,394,717,346	0.163101	0.658823
AFUB_062990	2,367,903,281	-0.102488	0.0735097	-1,394,210,645	0.163254	0.658823
AFUB_002030	9,464,924,967	-0.0713748	0.0512251	-1,393,354,673	0.163513	0.659432
AFUB_010300	690,357,445	-0.0699275	0.0502172	-1,392,500,477	0.163771	0.659432
AFUB_047270	3,388,329,006	-0.105131	0.0754741	-1,392,937,231	0.163639	0.659432
AFUB_068980	4,372,833,113	-0.0799391	0.0574156	-1,392,287,488	0.163835	0.659432
AFUB_002660	3,430,329,758	-0.0866833	0.0626866	-1,382,804,334	0.166725	0.65944
AFUB_003040	2,542,789,192	0.107604	0.0778674	1,381,893,644	0.167004	0.65944
AFUB_004440	6,762,064,319	0.0582093	0.0421204	1,381,974,571	0.16698	0.65944
AFUB_006390	9,848,879,786	-0.0603989	0.0436909	-1,382,414,686	0.166844	0.65944
AFUB_006990	9,394,080,094	0.0586443	0.0423752	138,392,799	0.166381	0.65944
AFUB_008470	4,275,049,014	0.0868143	0.062574	1,387,385,335	0.165324	0.65944
AFUB_014340	2,011,235,452	-0.077379	0.0557132	-1,388,882,088	0.164869	0.65944
AFUB_024330	8,264,939,569	0.0577932	0.0415917	1,389,536,915	0.16467	0.65944
AFUB_024570	7,446,303,944	-0.0648133	0.0466179	-1,390,308,826	0.164435	0.65944
AFUB_025590	3,273,669,696	0.0886109	0.0636935	1,391,207,962	0.164162	0.65944
AFUB_035120	6,634,418,357	-0.0860641	0.062095	-1,386,007,992	0.165744	0.65944
AFUB_039120	4,764,156,928	0.0729488	0.0527056	138,408,006	0.166334	0.65944
AFUB_040820	3,091,685,311	-0.0869428	0.0628413	-138,353,024	0.166502	0.65944
AFUB_042140	2,227,091,991	-0.1051	0.0757831	-1,386,856,838	0.165485	0.65944
AFUB_043310	9,090,727,186	0.0651697	0.0469623	1,387,702,948	0.165228	0.65944
AFUB_046390	4,778,943,172	0.0832527	0.060067	1,385,998,067	0.165747	0.65944
AFUB_051370	677,245,762	0.0759985	0.0547106	1,389,100,639	0.164802	0.65944
AFUB_053260	2,116,134,626	-0.0516415	0.0371586	-1,389,760,392	0.164602	0.65944
AFUB_054570	1,442,962,768	-0.0768972	0.0554881	-1,385,832,666	0.165798	0.65944
AFUB_055600	4,131,142,604	-0.0415182	0.0300036	-1,383,775,133	0.166427	0.65944
AFUB_057120	3,191,880,593	-0.0866856	0.0624457	-1,388,176,773	0.165083	0.65944
AFUB_059130	1,057,338,968	0.0700989	0.0505248	1,387,416,405	0.165315	0.65944
AFUB_064810	40,704,408	-0.0452792	0.0325658	-1,390,393,593	0.164409	0.65944
AFUB_067530	1,144,337,676	-0.0569699	0.041232	-1,381,690,513	0.167067	0.65944
AFUB_067920	3,398,814,916	-0.0934193	0.0674747	-1,384,509,424	0.166203	0.65944
AFUB_069620	1,441,095,448	-0.0485791	0.0349261	-1,390,913,714	0.164252	0.65944
AFUB_074720	7,005,387,477	-0.0720818	0.0521576	-1,381,999,378	0.166972	0.65944
AFUB_089220	5,797,360,025	-0.0742134	0.0533438	-1,391,227,473	0.164156	0.65944
AFUB_093620	2,863,900,116	0.085368	0.0617348	1,382,819,153	0.16672	0.65944
AFUB_094320	7,142,057,486	0.0634733	0.0458077	1,385,646,865	0.165855	0.65944
AFUB_089500	1,347,931,307	0.0588981	0.0426578	1,380,709,961	0.167368	0.660204
AFUB_063920	6,049,905,999	0.0760843	0.0551521	1,379,534,387	0.16773	0.660781
AFUB_082990	4,177,059,882	-0.090531	0.0656096	-1,379,844,629	0.167634	0.660781
AFUB_025190	7,024,981,434	0.0489196	0.0354832	1,378,670,913	0.167996	0.660979
AFUB_079100	2,639,276,484	0.104162	0.075547	1,378,766,148	0.167967	0.660979
AFUB_008150	1,299,471,322	-0.0618878	0.0449249	-1,377,583,906	0.168332	0.661875
AFUB_051570	1,174,993,615	-0.0683956	0.0496697	-1,377,009,054	0.168509	0.662148
AFUB_014800	6,511,721,996	0.0630649	0.0458497	1,375,469,146	0.168986	0.663326
AFUB_040280	137,246,349	0.0510411	0.0371116	1,375,340,541	0.169026	0.663326
AFUB_052510	709,085,694	-0.0708475	0.0515292	-1,374,899,306	0.169163	0.663438
AFUB_080520	3,612,661,402	0.0806778	0.0586942	1,374,545,518	0.169272	0.663444
AFUB_030110	8,227,237,122	-0.0730237	0.0531644	-1,373,545,514	0.169583	0.663697
AFUB_051020	2,210,616,791	-0.0440288	0.0320626	-1,373,215,065	0.169685	0.663697
AFUB_061440	374,219,292	0.0778713	0.0567186	1,372,941,974	0.16977	0.663697
AFUB_075120	4,392,476,665	0.0704647	0.0513106	1,373,295,305	0.169661	0.663697
AFUB_017970	4,643,149,421	0.0796587	0.0581035	1,370,979,649	0.170381	0.665262
AFUB_019340	6,728,637,629	-0.0927328	0.0676431	-1,370,913,384	0.170402	0.665262
AFUB_059110	6,156,442,129	0.0706851	0.051572	1,370,610,003	0.170497	0.665262
AFUB_058530	118,835,721	-0.0762357	0.0556363	-1,370,250,603	0.170609	0.665276
AFUB_065470	4,340,836,845	0.0778507	0.0568365	1,369,731,973	0.170771	0.665484
AFUB_001540	2,569,632,361	0.0991694	0.0724298	1,369,180,345	0.170943	0.665732
AFUB_100710	4,865,415,984	-0.107433	0.0785035	-1,368,506,757	0.171154	0.666129
AFUB_006660	5,243,229,052	-0.0491134	0.0359649	-1,365,593,616	0.172067	0.66669
AFUB_007390	294,421,956	0.0969872	0.0709768	1,366,464,053	0.171793	0.66669
AFUB_007410	6,280,934,655	-0.0662825	0.0486155	-1,363,404,794	0.172755	0.66669
AFUB_009160	3,159,474,078	-0.046422	0.0341274	-1,360,255,541	0.173749	0.66669
AFUB_012760	281,120,382	-0.125956	0.0925965	-1,360,264,008	0.173746	0.66669
AFUB_018360	2,227,939,539	0.112598	0.0823742	1,366,904,661	0.171655	0.66669
AFUB_019790	4,952,942,993	-0.0689792	0.0507265	-1,359,826,341	0.173885	0.66669
AFUB_021860	2,820,135,748	0.0380731	0.0279276	1,363,281,838	0.172794	0.66669
AFUB_022230	3,780,324,059	0.078085	0.0573103	1,362,495,145	0.173042	0.66669
AFUB_023490	3,090,657,263	-0.0896821	0.0657429	-1,364,134,745	0.172525	0.66669
AFUB_031530	5,107,790,555	0.0777665	0.0569923	1,364,508,853	0.172407	0.66669
AFUB_032900	7,718,370,972	-0.0565341	0.0414708	-136,322,853	0.17281	0.66669
AFUB_044340	2,871,905,501	-0.107056	0.0784443	-1,364,737,066	0.172336	0.66669
AFUB_045595	5,724,769,975	-0.0652856	0.0479845	-136,055,518	0.173654	0.66669
AFUB_052340	1,429,847,990,079	0.050323	0.0369892	1,360,475,913	0.173679	0.66669
AFUB_055960	7,144,862,038	0.0715665	0.0525285	1,362,432,252	0.173062	0.66669
AFUB_059020	4,887,851,952	0.0691914	0.0508586	1,360,465,789	0.173683	0.66669
AFUB_063970	236,314,359	-0.0466984	0.0343494	-1,359,513,095	0.173984	0.66669
AFUB_067760	2,495,189,795	-0.112613	0.0827591	-136,073,711	0.173597	0.66669
AFUB_083360	4,498,055,463	-0.0769312	0.056443	-1,362,990,158	0.172886	0.66669
AFUB_083540	1,043,208,509	-0.0598457	0.0438419	-1,365,033,969	0.172242	0.66669
AFUB_089010	5,075,893,636	0.0761325	0.0559502	1,360,718,276	0.173603	0.66669
AFUB_092680	5,212,788,796	0.0778555	0.0572718	1,359,404,312	0.174019	0.66669
AFUB_093550	5,097,272,076	0.0480828	0.0352691	1,363,310,946	0.172785	0.66669
AFUB_097810	9,277,068,484	-0.0640304	0.0468554	-1,366,553,415	0.171765	0.66669
AFUB_020910	9,064,372,399	0.0517529	0.0380843	135,890,365	0.174177	0.666881
AFUB_012770	6,329,869,666	-0.0659678	0.0485721	-1,358,142,565	0.174418	0.667388
AFUB_023810	7,432,451,391	-0.0557018	0.0410263	-1,357,710,865	0.174555	0.667495
AFUB_001200	1,245,776,729	0.052425	0.0386231	1,357,349,682	0.17467	0.667517
AFUB_036240	168,543,591	-0.0493442	0.0363722	-1,356,645,422	0.174894	0.667539
AFUB_043330	3,587,860,052	-0.0467779	0.0344768	-1,356,790,795	0.174848	0.667539
AFUB_007010	3,780,885,502	-0.079064	0.0583942	-1,353,969,784	0.175746	0.667878
AFUB_036630	4,576,632,351	0.0698616	0.0515962	1,354,006,628	0.175734	0.667878
AFUB_040100	1,674,689,774	0.0477002	0.035189	1,355,543,189	0.175245	0.667878
AFUB_051710	2,764,024,575	0.0928228	0.0685198	1,354,685,327	0.175518	0.667878
AFUB_054940	753,177,099	-0.05851	0.0431725	-1,355,262,485	0.175334	0.667878
AFUB_056390	2,079,853,426	-0.0413635	0.0305233	-1,355,142,505	0.175372	0.667878
AFUB_093160	1,732,643,161	-0.0465018	0.0343322	-1,354,467,064	0.175587	0.667878
AFUB_000950	7,978,553,958	0.0598284	0.0442508	1,352,030,487	0.176366	0.669619
AFUB_051380	3,731,953,124	0.104763	0.0774958	1,351,852,286	0.176423	0.669619
AFUB_037620	3,791,153,621,733	-0.0434341	0.0321509	-1,350,944,359	0.176713	0.670307
AFUB_005890	2,412,821,352	0.110056	0.0815754	1,349,130,893	0.177295	0.671437
AFUB_020130	1,157,384,741	0.0470087	0.0348738	1,347,967,745	0.177669	0.671437
AFUB_035810	2,414,011,704	-0.0454828	0.0337362	-1,348,191,048	0.177597	0.671437
AFUB_044890	4,575,262,608	0.0707335	0.0524468	1,348,671,422	0.177443	0.671437
AFUB_068770	2,117,282,782	0.0424268	0.0314495	1,349,044,823	0.177323	0.671437
AFUB_086040	6,244,959,605	-0.359962	0.266998	-1,348,184,277	0.177599	0.671437
AFUB_004310	4,966,868,905	0.0680569	0.0505814	1,345,491,072	0.178467	0.671766
AFUB_006310	1,710,930,769	0.0507352	0.0377125	1,345,314,698	0.178524	0.671766
AFUB_021760	4,507,015,181	0.0804747	0.0597527	1,346,797,493	0.178045	0.671766
AFUB_039230	4,249,719,729	0.0728693	0.0541281	1,346,239,011	0.178225	0.671766
AFUB_051060	5,450,214,483	-0.0640653	0.0475969	-134,599,583	0.178304	0.671766
AFUB_082210	9,169,319,832	0.0445286	0.0330932	1,345,550,373	0.178448	0.671766
AFUB_092940	7,578,301,089	-0.0567748	0.0421902	-1,345,688,615	0.178403	0.671766
AFUB_011080	8,277,856,462	0.056777	0.0422244	1,344,648,133	0.178739	0.672164
AFUB_023410	7,244,189,825	0.0625973	0.0465991	1,343,315,853	0.17917	0.673091
AFUB_024490	4,246,298,793	0.0683264	0.0508681	1,343,205,867	0.179205	0.673091
AFUB_094750	1,261,748,186	0.0544677	0.0405612	134,285,169	0.17932	0.673109
AFUB_028500	5,579,829,057	-0.0698233	0.0520642	-134,109,973	0.179888	0.673591
AFUB_063070	2,577,541,271	0.0899542	0.0670576	1,341,446,409	0.179776	0.673591
AFUB_083710	4,318,105,857	0.074786	0.0557595	1,341,224,178	0.179848	0.673591
AFUB_096740	3,967,464,266	0.0647049	0.0482196	1,341,879,473	0.179635	0.673591
AFUB_019180	2,871,912,757	0.0480519	0.03587	1,339,615,021	0.180371	0.673966
AFUB_050930	3,391,714,424	0.083835	0.0625432	1,340,434,196	0.180104	0.673966
AFUB_054690	1,300,767,674	-0.0461258	0.0344367	-1,339,437,389	0.180428	0.673966
AFUB_059680	4,219,793,459	0.0703439	0.0525045	1,339,768,715	0.180321	0.673966
AFUB_037690	7,160,235,413	0.0603092	0.0450734	1,338,021,381	0.180889	0.674904
AFUB_093610	4,983,956,498	0.0711835	0.0532018	1,337,989,568	0.1809	0.674904
AFUB_050790	2,703,343,017	0.0837338	0.0625996	1,337,607,661	0.181024	0.674958
AFUB_011610	3,517,357,352	-0.0821503	0.061444	-133,699,342	0.181225	0.675051
AFUB_042910	3,201,891,476	0.0451022	0.0337376	1,336,855,463	0.18127	0.675051
AFUB_015310	1,914,475,361	-0.0451186	0.033761	-1,336,411,538	0.181415	0.67518
AFUB_005640	3,514,643,978	0.0971105	0.0728888	1,332,309,276	0.182759	0.67532
AFUB_011380	8,553,271,058	0.0572046	0.0428393	1,335,331,641	0.181768	0.67532
AFUB_021340	2,497,902,838	0.0523177	0.0392595	1,332,610,997	0.182659	0.67532
AFUB_024500	1,060,403,263	-0.0535309	0.0401701	-1,332,606,305	0.182661	0.67532
AFUB_038630	6,271,710,626	-0.0599476	0.044962	-1,333,296,276	0.182435	0.67532
AFUB_048460	2,853,990,053	0.0840082	0.0629541	1,334,435,243	0.182061	0.67532
AFUB_058570	7,069,111,342	-0.0578034	0.0433875	-1,332,258,602	0.182775	0.67532
AFUB_072850	3,814,235,056	0.0737056	0.0552428	1,334,212,842	0.182134	0.67532
AFUB_078460	1,992,151,155	-0.0557337	0.0417616	-1,334,567,432	0.182018	0.67532
AFUB_082200	6,957,262,461	-0.0642675	0.0481493	-1,334,754,679	0.181957	0.67532
AFUB_091950	5,058,726,497	-0.108511	0.0813287	-1,334,227,897	0.182129	0.67532
AFUB_096170	383,151,358,939	0.0854061	0.0640262	1,333,924,469	0.182229	0.67532
AFUB_051250	6,809,822,118	0.0648662	0.0487043	1,331,836,571	0.182914	0.675425
AFUB_005410	1,046,406,918	-0.0568925	0.0427316	-1,331,391,008	0.18306	0.675559
AFUB_054590	2,345,218,506	0.0908377	0.0682862	1,330,250,476	0.183436	0.676466
AFUB_065240	8,945,108,811	0.0603452	0.0453732	1,329,973,395	0.183527	0.676466
AFUB_020830	543,171,916	-0.063347	0.047757	-1,326,444,358	0.184693	0.677153
AFUB_023130	3,247,351,504	-0.0825489	0.0621737	-1,327,714,653	0.184272	0.677153
AFUB_023920	1,385,461,789	-0.0625	0.0471049	-1,326,826,236	0.184566	0.677153
AFUB_029930	2,635,752,669	0.100191	0.075535	1,326,419,229	0.184701	0.677153
AFUB_030090	1,941,374,024	0.0578929	0.0436377	1,326,670,783	0.184618	0.677153
AFUB_053330	3,458,445,877	-0.0771907	0.058115	-1,328,242,075	0.184098	0.677153
AFUB_053810	4,402,883,151	-0.0710281	0.0535497	-132,639,695	0.184708	0.677153
AFUB_074880	4,901,281,727	-0.0375738	0.0282798	-1,328,645,596	0.183965	0.677153
AFUB_076610	6,268,083,359	-0.0721653	0.054304	-1,328,913,669	0.183876	0.677153
AFUB_030960	1,305,207,406	-0.0688451	0.0519322	-1,325,673,706	0.184948	0.677221
AFUB_058380	2,265,739,869	0.0541827	0.040868	1,325,798,062	0.184907	0.677221
AFUB_046080	5,742,818,152	0.0625427	0.0472066	132,487,244	0.185213	0.677384
AFUB_090600	1,178,037,067	-0.0609976	0.0460359	-1,324,998,917	0.185172	0.677384
AFUB_001580	4,202,806,409	0.0711147	0.0537071	1,324,122,613	0.185462	0.677599
AFUB_038460	107,825,361	0.060303	0.0455525	1,323,812,468	0.185565	0.677599
AFUB_080860	652,307,497	0.0654685	0.0494589	1,323,695,245	0.185604	0.677599
AFUB_060250	3,567,815,582	-0.0786193	0.0594516	-1,322,408,523	0.186032	0.678353
AFUB_080300	771,608,722	0.037376	0.0282601	1,322,573,131	0.185977	0.678353
AFUB_010330	3,993,396,155	0.044953	0.0340082	132,182,991	0.186225	0.678465
AFUB_043070	1,824,930,611	-0.0466811	0.0353203	-1,321,651,245	0.186284	0.678465
AFUB_001570	2,524,128,242	-0.0480967	0.0364347	-132,007,937	0.186809	0.67997
AFUB_063850	3,680,284,996	0.0763413	0.0579268	1,317,893,535	0.187539	0.682224
AFUB_019330	2,416,919,701	0.0414308	0.0314729	131,639,635	0.188041	0.683644
AFUB_019520	7,493,976,271	0.0556679	0.0423153	1,315,552,335	0.188324	0.683702
AFUB_035360	5,391,198,734	0.0627555	0.0477208	1,315,054,115	0.188492	0.683702
AFUB_058930	1,475,035,251	-0.0343814	0.0261452	-1,315,017,203	0.188504	0.683702
AFUB_059290	1,303,198,338	0.0469838	0.0357043	1,315,914,722	0.188203	0.683702
AFUB_082490	5,919,026,686	-0.0730343	0.0555526	-1,314,687,107	0.188615	0.683702
AFUB_056800	7,691,583,611	-0.0579545	0.0440951	-1,314,307,816	0.188743	0.68376
AFUB_009730	8,315,592,519	-0.0540101	0.0411437	-1,312,718,622	0.189278	0.68408
AFUB_010220	3,093,334,552	-0.0868069	0.0661053	-1,313,159,629	0.189129	0.68408
AFUB_016510	3,509,080,482	-0.0968351	0.0737177	-1,313,592,677	0.188983	0.68408
AFUB_056040	3,888,478,682	0.0790403	0.0602084	1,312,778,977	0.189257	0.68408
AFUB_036320	5,722,850,342	-0.0612126	0.0466622	-1,311,822,694	0.18958	0.684768
AFUB_053750	6,676,256,159	-0.0635866	0.0484948	-1,311,205,117	0.189788	0.685117
AFUB_094160	1,471,071,024	-0.0501294	0.0382653	-1,310,049,526	0.190179	0.686123
AFUB_022460	4,385,651,604	-0.0819827	0.0626266	-1,309,071,426	0.19051	0.686913
AFUB_005520	5,010,569,203	-0.0742666	0.0567752	-130,808,113	0.190846	0.687375
AFUB_007000	1,087,867,652	0.0538872	0.0412597	1,306,048,999	0.191536	0.687375
AFUB_028750	5,539,490,115	0.0634833	0.048582	1,306,726,144	0.191306	0.687375
AFUB_073340	2,472,240,753	-0.106416	0.0814603	-1,306,351,817	0.191433	0.687375
AFUB_097220	896,529,713	0.0525057	0.0401623	1,307,335,601	0.191099	0.687375
AFUB_098610	2,481,128,058	0.109335	0.0836686	1,306,767,222	0.191292	0.687375
AFUB_098910	3,027,937,221	-0.0825709	0.0632121	-1,306,252,661	0.191467	0.687375
AFUB_100160	4,779,560,352	0.0662634	0.0506995	1,306,983,592	0.191218	0.687375
AFUB_051150	3,301,740,872	-0.127353	0.0975586	-1,305,401,105	0.191756	0.687763
AFUB_067900	7,878,571,039	-0.0901617	0.0690899	-1,304,991,834	0.191896	0.68786
AFUB_008630	5,288,984,902	-0.0669819	0.0513807	-1,303,640,233	0.192356	0.688239
AFUB_011540	1,137,085,583	-0.0603607	0.0462979	-1,303,745,613	0.19232	0.688239
AFUB_033930	970,782,857	-0.255096	0.195599	-1,304,177,309	0.192173	0.688239
AFUB_095050	2,655,255,695	-0.0905234	0.0694537	-1,303,363,205	0.192451	0.688239
AFUB_056620	4,133,970,203	0.0759611	0.0583283	1,302,302,203	0.192813	0.689132
AFUB_025430	9,189,396,955	-0.0551121	0.0423327	-130,188,136	0.192957	0.689244
AFUB_006120	2,500,694,966	0.0929386	0.0714283	1,301,145,309	0.193209	0.689742
AFUB_066060	3,615,815,655	-0.0955207	0.0734442	-130,058,895	0.193399	0.690019
AFUB_009170	1,291,756,577	0.0553025	0.0425776	1,298,864,844	0.19399	0.690356
AFUB_018380	317,029,934	-0.108706	0.0836908	-129,889,838	0.193979	0.690356
AFUB_052970	2,431,175,327	-0.0478596	0.0368226	-1,299,736,242	0.193691	0.690356
AFUB_059300	7,359,012,329	-0.0632382	0.0487123	-1,298,197,299	0.19422	0.690356
AFUB_063050	7,546,745,941	-0.0541881	0.0417375	-1,298,308,993	0.194181	0.690356
AFUB_098880	9,514,192,072	0.0505255	0.0388986	1,298,903,297	0.193977	0.690356
AFUB_098900	6,821,488,464	-0.0600739	0.0462814	-1,298,014,844	0.194282	0.690356
AFUB_001050	1,270,343,552	0.045342	0.0350345	1,294,212,991	0.195592	0.690831
AFUB_007790	3,374,482,361	-0.0425522	0.0328112	-1,296,879,698	0.194673	0.690831
AFUB_018840	2,614,763,742	0.0896045	0.069106	1,296,623,765	0.194761	0.690831
AFUB_028550	1,652,414,566	0.0458922	0.0354421	129,484,777	0.195373	0.690831
AFUB_028770	1,396,819,911	0.0493763	0.038151	1,294,235,281	0.195584	0.690831
AFUB_043430	4,416,978,408	0.0684317	0.0529228	1,293,047,241	0.195995	0.690831
AFUB_043810	2,981,535,474	0.0824493	0.0635746	1,296,891,294	0.194669	0.690831
AFUB_062470	1,425,997,114	0.0605872	0.0467442	1,296,144,343	0.194926	0.690831
AFUB_067210	1,632,537,054	-0.0497129	0.0384253	-1,293,755,519	0.19575	0.690831
AFUB_072780	4,515,992,351	-0.0422673	0.0326255	-1,295,531,859	0.195137	0.690831
AFUB_081550	2,060,622,491	-0.0512879	0.0395902	-1,295,470,192	0.195158	0.690831
AFUB_088400	2,586,875,778	0.0439993	0.0340247	1,293,158,158	0.195956	0.690831
AFUB_093320	1,618,320,847	-0.0497465	0.0384261	-1,294,602,417	0.195457	0.690831
AFUB_095120	3,113,749,136	0.0920452	0.0711739	1,293,243,287	0.195927	0.690831
AFUB_022280	3,499,022,496	0.0782425	0.0606208	1,290,688,505	0.196812	0.690928
AFUB_038830	4,151,691,824	0.0758908	0.0587846	1,290,997,795	0.196704	0.690928
AFUB_054810	5,699,651,277	-0.0647007	0.0500913	-129,165,575	0.196476	0.690928
AFUB_055640	1,337,173,886	-0.0507875	0.0393474	-1,290,745,535	0.196792	0.690928
AFUB_074340	2,465,182,352	-0.084772	0.0656238	-1,291,787,473	0.196431	0.690928
AFUB_083870	4,423,566,836	0.069025	0.0534084	129,240,078	0.196218	0.690928
AFUB_087520	7,821,567,277	0.0692284	0.053596	1,291,671,992	0.196471	0.690928
AFUB_053730	285,970,512	-0.0820341	0.0636191	-1,289,458,306	0.197239	0.69186
AFUB_064970	3,517,241	-0.0719611	0.0558152	-1,289,272,941	0.197303	0.69186
AFUB_000370	5,578,838,844	-0.0711464	0.0552281	-1,288,228,357	0.197666	0.691956
AFUB_000540	8,336,551,076	0.0549133	0.0426301	1,288,135,631	0.197699	0.691956
AFUB_011440	2,702,260,703	0.0817573	0.0634411	1,288,713,094	0.197498	0.691956
AFUB_083330	4,300,491,894	-0.0699833	0.0543392	-1,287,895,616	0.197782	0.691956
AFUB_009820	3,150,605,755	-0.0840888	0.0653259	-1,287,219,975	0.198018	0.692384
AFUB_066170	3,929,709,599	0.0802996	0.0624045	1,286,759,831	0.198178	0.692549
AFUB_021600	4,719,523,158	0.0727198	0.0565859	1,285,123,763	0.198749	0.693666
AFUB_056490	2,960,304,749	0.0943652	0.0734425	1,284,885,723	0.198832	0.693666
AFUB_088260	4,793,694,203	0.0712014	0.0554152	12,848,709	0.198837	0.693666
AFUB_007700	9,955,360,539	-0.0571373	0.0444894	-1,284,290,759	0.19904	0.693979
AFUB_006029	2,797,206,468	-0.0798003	0.0621863	-1,283,246,043	0.199406	0.694068
AFUB_026400	503,105,918	0.0667014	0.0519709	128,343,733	0.199339	0.694068
AFUB_035300	4,434,066,283	0.0809576	0.0630812	128,338,664	0.199357	0.694068
AFUB_002710	991,946,265	0.0684056	0.0534453	1,279,918,383	0.200574	0.695029
AFUB_009330	2,301,395,921	-0.0530839	0.0415686	-1,277,016,891	0.201596	0.695029
AFUB_028020	5,701,623,245	0.0600548	0.0469014	128,044,802	0.200388	0.695029
AFUB_030640	1,316,735,203	0.0459739	0.0359527	1,278,733,156	0.200991	0.695029
AFUB_037920	8,183,546,046	-0.0596762	0.0466361	-127,961,296	0.200681	0.695029
AFUB_039760	6,009,285,286	0.0659304	0.0514561	1,281,294,977	0.20009	0.695029
AFUB_041070	2,121,975,553	-0.058745	0.0458221	-1,282,022,654	0.199835	0.695029
AFUB_041930	3,653,284,268	-0.077714	0.0608493	-1,277,154,848	0.201548	0.695029
AFUB_042810	3,951,815,067	0.0485482	0.0379045	1,280,802,914	0.200263	0.695029
AFUB_047690	1,538,316,768	-0.0726145	0.0567191	-1,280,247,291	0.200458	0.695029
AFUB_052930	2,334,040,843	0.0391472	0.0306427	1,277,536,434	0.201413	0.695029
AFUB_056050	4,069,227,896	0.0688141	0.0539019	1,276,655,051	0.201724	0.695029
AFUB_070800	1,550,298,026	-0.0481224	0.0375727	-1,280,782,259	0.20027	0.695029
AFUB_071820	4,561,867,125	0.0727597	0.0569919	1,276,666,898	0.20172	0.695029
AFUB_086920	1,829,599,267	-0.0502048	0.0392843	-1,277,985,791	0.201254	0.695029
AFUB_094140	125,333,441	-0.0482233	0.0377287	-1,278,160,444	0.201193	0.695029
AFUB_096270	3,780,584,134	0.0805142	0.0630094	1,277,812,159	0.201316	0.695029
AFUB_096730	3,258,559,431	0.0960417	0.0751019	1,278,818,228	0.200961	0.695029
AFUB_002930	6,115,378,814	0.0439433	0.034545	1,272,057,795	0.203353	0.696444
AFUB_008350	9,875,658,489	0.0500999	0.0393498	1,273,190,773	0.20295	0.696444
AFUB_010880	7,987,158,553	0.0538641	0.0423347	1,272,339,587	0.203252	0.696444
AFUB_021020	5,670,946,521	-0.146313	0.114986	-1,272,441,097	0.203216	0.696444
AFUB_038960	2,801,307,514	-0.0838296	0.0658515	-1,273,009,003	0.203015	0.696444
AFUB_039080	1,094,022,592	-0.0560298	0.0440086	-1,273,155,994	0.202963	0.696444
AFUB_041550	2,679,737,996	-0.0872819	0.0686151	-127,205,106	0.203355	0.696444
AFUB_057300	62,357,443	-0.0595906	0.0468493	-1,271,962,427	0.203386	0.696444
AFUB_062360	185,880,402	-0.0486699	0.038191	-1,274,381,926	0.202528	0.696444
AFUB_088240	3,615,074,282	-0.0782179	0.0615092	-1,271,645,913	0.203499	0.696444
AFUB_091370	3,317,360,631	-0.0344927	0.0271231	-1,271,707,593	0.203477	0.696444
AFUB_092170	3,144,888,125	0.0761545	0.0598588	1,272,234,873	0.20329	0.696444
AFUB_098180	4,092,895,406	-0.0880351	0.0692812	-1,270,691,968	0.203838	0.697216
AFUB_012110	4,737,476,817	-0.0692447	0.0545269	-1,269,917,525	0.204114	0.69738
AFUB_040780	5,410,235,767	-0.0646323	0.0508841	-1,270,186,525	0.204018	0.69738
AFUB_034930	275,876,644	0.0855361	0.0673778	1,269,500,109	0.204263	0.697499
AFUB_013520	4,212,758,403	0.0658977	0.0519244	1,269,108,279	0.204402	0.697587
AFUB_024900	1,104,524,715	0.0508209	0.0400697	1,268,312,474	0.204686	0.697779
AFUB_072860	1,657,187,732	-0.0450349	0.0355076	-1,268,317,026	0.204685	0.697779
AFUB_031050	3,360,811,181	-0.0799471	0.0631242	-1,266,504,122	0.205333	0.699204
AFUB_082900	3,133,945,543	0.0754656	0.0595815	1,266,594,433	0.2053	0.699204
AFUB_029280	8,853,441,755	0.0485028	0.0383133	1,265,952,648	0.20553	0.699487
AFUB_016370	390,480,901	-0.0739205	0.0584586	-1,264,493,117	0.206053	0.699783
AFUB_022810	5,566,684,268	-0.063986	0.0505899	-1,264,797,969	0.205944	0.699783
AFUB_023500	40,541,195	0.0710734	0.0562096	1,264,435,575	0.206074	0.699783
AFUB_050290	1,012,923,396	-0.0590745	0.0466891	-1,265,272,714	0.205774	0.699783
AFUB_000530	212,268,456	0.0365618	0.0289352	1,263,574,966	0.206383	0.699958
AFUB_071600	1,437,622,174	0.0517137	0.0409342	1,263,336,434	0.206468	0.699958
AFUB_082540	4,515,307,142	-0.0716624	0.0567	-1,263,887,085	0.206271	0.699958
AFUB_019090	5,756,962,293	0.0579787	0.0459257	1,262,445,693	0.206788	0.700617
AFUB_094540	3,040,127,433	-0.0770028	0.0610087	-1,262,160,013	0.206891	0.700617
AFUB_026120	303,199,419	-0.078844	0.0624867	-1,261,773,085	0.20703	0.700701
AFUB_003300	3,983,761,459	-0.0676599	0.0538398	-1,256,689,733	0.208866	0.700927
AFUB_003970	2,918,057,363	0.0808693	0.064192	1,259,803,923	0.20774	0.700927
AFUB_011100	4,853,533,708	0.0747649	0.059369	1,259,325,441	0.207913	0.700927
AFUB_011720	4,636,003,453	-0.0382345	0.0303593	-1,259,398,538	0.207886	0.700927
AFUB_014140	8,876,659,589	-0.0485158	0.0385867	-1,257,320,268	0.208638	0.700927
AFUB_024060	1,048,812,305	-0.0472766	0.0376232	-1,256,581,682	0.208905	0.700927
AFUB_037000	2,309,303,222	-0.0463448	0.0368439	-1,257,869,011	0.208439	0.700927
AFUB_043830	5,452,333,723	0.0659738	0.0523516	126,020,573	0.207595	0.700927
AFUB_047060	6,211,059,202	0.0672877	0.0534305	1,259,349,826	0.207904	0.700927
AFUB_049560	1,762,923,697	0.0516483	0.0411043	125,651,871	0.208928	0.700927
AFUB_069770	1,529,237,895	0.0613839	0.0488058	1,257,717,132	0.208494	0.700927
AFUB_070090	7,594,129,492	0.0540913	0.0430462	1,256,586,483	0.208903	0.700927
AFUB_083250	9,370,018,421	-0.0845246	0.0671445	-1,258,847,007	0.208086	0.700927
AFUB_091450	1,484,448,317	-0.0509799	0.0405344	-125,769,482	0.208502	0.700927
AFUB_093450	2,375,057,478	0.0930924	0.0740011	1,257,986,094	0.208397	0.700927
AFUB_098260	9,609,832,515	0.0486595	0.038628	1,259,695,146	0.207779	0.700927
AFUB_000780	9,876,127,531	-0.0698536	0.0557696	-1,252,537,849	0.210374	0.701706
AFUB_003330	4,747,301,962	-0.0983752	0.0785743	-1,252,002,638	0.210569	0.701706
AFUB_006460	6,413,772,487	-0.0603652	0.0482839	-1,250,212,059	0.211222	0.701706
AFUB_009000	6,679,419,079	0.0596484	0.0476926	1,250,683,812	0.21105	0.701706
AFUB_014210	3,122,884,688	-0.078375	0.0624663	-1,254,676,875	0.209596	0.701706
AFUB_019810	8,943,218,593	-0.0592302	0.0471833	-125,532,227	0.209362	0.701706
AFUB_019850	6,319,652,887	-0.068871	0.0550351	-1,251,400,756	0.210788	0.701706
AFUB_022970	4,738,854,505	-0.0790702	0.063233	-1,250,458,112	0.211132	0.701706
AFUB_028480	315,159,579	0.0768488	0.0613253	1,253,133,257	0.210157	0.701706
AFUB_031100	8,819,533,661	0.0503758	0.0401801	125,374,933	0.209933	0.701706
AFUB_044320	8,745,469,223	0.0530017	0.0423701	1,250,923,013	0.210963	0.701706
AFUB_052380	9,218,835,892	0.051586	0.0412065	1,251,890,588	0.21061	0.701706
AFUB_054930	7,212,146,562	0.0536877	0.0428178	1,253,863,931	0.209891	0.701706
AFUB_057320	7,711,141,924	-0.0565314	0.0451667	-1,251,617,045	0.210709	0.701706
AFUB_068370	2,096,970,341	-0.0391823	0.0312748	-125,283,792	0.210265	0.701706
AFUB_089510	1,938,293,911	-0.0460625	0.0367778	-1,252,454,998	0.210404	0.701706
AFUB_099200	8,942,807,618	-0.0498894	0.0397661	-1,254,570,986	0.209635	0.701706
AFUB_099630	4,676,499,477	0.0768533	0.0613698	1,252,299,878	0.210461	0.701706
AFUB_006410	1,020,598,923	0.0456467	0.0365309	124,953,822	0.211468	0.702075
AFUB_008520	1,201,334,822	-0.038226	0.0305984	-1,249,280,971	0.211562	0.702075
AFUB_051920	7,698,942,273	0.0384323	0.030787	1,248,327,712	0.211911	0.702471
AFUB_073920	552,717,806	0.0418973	0.033556	1,248,578,714	0.211819	0.702471
AFUB_031280	2,657,035,363	-0.0873147	0.0699875	-124,757,494	0.212187	0.702625
AFUB_088640	6,189,925,627	-0.0593047	0.0475283	-1,247,774,385	0.212114	0.702625
AFUB_056070	1,757,757,384	-0.0440112	0.0352969	-1,246,883,082	0.21244	0.703085
AFUB_052550	414,995,197	-0.0687021	0.0551918	-1,244,788,048	0.21321	0.70525
AFUB_036060	705,163,414	-0.0565121	0.0454472	-1,243,466,018	0.213696	0.705335
AFUB_036370	1,160,220,696	0.0533779	0.0429214	1,243,617,588	0.21364	0.705335
AFUB_040710	3,146,332,629	0.0496268	0.0399082	1,243,524,587	0.213675	0.705335
AFUB_089000	4,128,015,525	0.0660274	0.0530908	1,243,669,094	0.213621	0.705335
AFUB_096130	3,793,798,432	-0.070858	0.0570207	-1,242,671,517	0.213989	0.705921
AFUB_100110	6,783,729,516	0.0366734	0.0295508	1,241,031,303	0.214594	0.707537
AFUB_065450	3,032,201,455	0.0763553	0.0615572	1,240,396,235	0.214829	0.70793
AFUB_008940	7,289,056,934	-0.0603419	0.0486738	-1,239,718,768	0.215079	0.708375
AFUB_007860	1,551,191,678	-0.0436609	0.0352665	-1,238,028,231	0.215706	0.708852
AFUB_014540	456,741,511	-0.0938486	0.0758401	-1,237,453,998	0.215919	0.708852
AFUB_019150	6,294,439,424	0.0629663	0.0508791	1,237,567,953	0.215876	0.708852
AFUB_027580	1,275,785,504	0.0461599	0.0372816	1,238,140,447	0.215664	0.708852
AFUB_036120	498,327,886	-0.0904111	0.0729859	-1,238,748,019	0.215439	0.708852
AFUB_091610	330,761,436	-0.0895939	0.0723784	-1,237,853,068	0.215771	0.708852
AFUB_050300	8,939,488,409	0.0551911	0.0446465	1,236,177,529	0.216393	0.710027
AFUB_067570	3,223,684,047	0.0742162	0.0601069	1,234,735,244	0.216929	0.71126
AFUB_081470	2,834,953,407	-0.248033	0.200961	-1,234,231,938	0.217116	0.71126
AFUB_087940	4,791,133,558	-0.0697864	0.0565365	-1,234,359,175	0.217069	0.71126
AFUB_010890	2,321,811,555	0.0409826	0.0332219	1,233,600,972	0.217352	0.711269
AFUB_084010	4,727,444,725	-0.0839785	0.0680664	-1,233,772,998	0.217288	0.711269
AFUB_056380	4,327,293,508	-0.0669046	0.0542985	-1,232,164,345	0.217888	0.712263
AFUB_067990	6,697,862,698	-0.0333178	0.0270373	-123,229,211	0.21784	0.712263
AFUB_032790	3,119,449,967	0.0712184	0.0578616	1,230,839,613	0.218383	0.712456
AFUB_043410	1,505,749,445	0.0419654	0.0340902	1,231,009,358	0.218319	0.712456
AFUB_059520	4,803,130,396	-0.0697726	0.0566905	-1,230,761,698	0.218412	0.712456
AFUB_080170	4,723,532,667	0.0841932	0.0683723	1,231,393,842	0.218176	0.712456
AFUB_007640	1,259,780,925	0.0431855	0.0351409	1,228,923,321	0.219101	0.713722
AFUB_012260	9,725,998,119	-0.0463383	0.0377295	-1,228,171,104	0.219383	0.713722
AFUB_065090	4,767,770,529	-0.0710015	0.0578032	-1,228,331,367	0.219323	0.713722
AFUB_068530	7,685,022,537	0.0532887	0.043371	1,228,672,267	0.219195	0.713722
AFUB_072680	5,938,974,669	0.0407751	0.0331667	1,229,400,869	0.218922	0.713722
AFUB_019490	5,327,990,901	-0.0594682	0.0484327	-1,227,850,597	0.219503	0.713734
AFUB_004360	6,701,665,864	0.0556626	0.0453537	1,227,300,651	0.21971	0.713912
AFUB_035840	1,092,962,285	-0.0486595	0.0396545	-122,708,488	0.219791	0.713912
AFUB_096390	6,714,097,436	-0.06148	0.050122	-1,226,606,746	0.21997	0.714117
AFUB_009840	2,343,756,094	-0.0922242	0.0753371	-1,224,153,526	0.220894	0.715315
AFUB_022760	5,075,099,937	0.063272	0.0516861	1,224,158,546	0.220892	0.715315
AFUB_034780	1,598,367,189	-0.0432092	0.0353014	-1,224,006,417	0.22095	0.715315
AFUB_039570	2,350,017,151	-0.0427696	0.0349226	-1,224,695,925	0.22069	0.715315
AFUB_060900	8,595,470,869	0.0519127	0.0424269	1,223,579,476	0.221111	0.715315
AFUB_064710	6,695,046,661	-0.0593522	0.0484557	-1,224,874,493	0.220623	0.715315
AFUB_068850	1,415,636,711	-0.044645	0.0365001	-1,223,148,658	0.221274	0.715315
AFUB_094170	6,581,865,249	0.0580944	0.0474926	1,223,232,098	0.221242	0.715315
AFUB_036160	1,577,877,954	-0.03935	0.0321868	-122,255,175	0.221499	0.715666
AFUB_020720	5,401,610,387	0.0618358	0.050646	1,220,941,443	0.222108	0.716124
AFUB_028360	2,725,130,439	0.0821815	0.0673085	1,220,967,175	0.222098	0.716124
AFUB_037160	3,248,436,284	0.0790875	0.0647541	1,221,351,489	0.221953	0.716124
AFUB_085770	8,658,720,748	-0.185768	0.152119	-122,119,794	0.222011	0.716124
AFUB_014250	245,593,985	-0.0399977	0.0327744	-1,220,393,922	0.222316	0.716415
AFUB_068820	5,772,707,804	-0.0611101	0.0501434	-12,187,055	0.222956	0.718101
AFUB_002680	15,130,514,280,219	0.0438507	0.0360179	1,217,469,079	0.223426	0.718722
AFUB_080900	225,945,645	-0.115655	0.0950095	-1,217,297,036	0.223491	0.718722
AFUB_086090	9,207,565,512	-0.235141	0.193171	-121,727,193	0.223501	0.718722
AFUB_008840	4,357,516,507	-0.0667325	0.0549354	-121,474,424	0.224464	0.720251
AFUB_026850	5,801,129,877	-0.064096	0.0527596	-1,214,869,484	0.224416	0.720251
AFUB_027880	897,772,636	0.051246	0.0421826	1,214,860,196	0.224419	0.720251
AFUB_029560	2,723,361,434	-0.0742005	0.061058	-1,215,246,976	0.224272	0.720251
AFUB_044470	4,284,026,244	-0.0783602	0.0645443	-1,214,051,825	0.224728	0.720251
AFUB_059690	112,611,508	-0.0521646	0.0429709	-1,213,951,633	0.224766	0.720251
AFUB_101110	5,401,396,681	0.0618036	0.0509147	1,213,864,914	0.224799	0.720251
AFUB_007240	6,884,365,901	0.0550426	0.0453596	1,213,471,386	0.22495	0.720356
AFUB_023400	7,935,046,059	0.0539235	0.0444488	121,316,012	0.225069	0.720361
AFUB_015880	4,973,266,209	-0.0710455	0.0586105	-1,212,164,176	0.22545	0.721203
AFUB_022940	1,335,865,714	0.0422862	0.0349045	1,211,482,864	0.22571	0.721661
AFUB_000940	4,018,537,878	0.085374	0.0705429	121,024,284	0.226186	0.722597
AFUB_031830	3,518,532,691	-0.0702395	0.0580573	-1,209,830,699	0.226344	0.722597
AFUB_041360	2,706,354,717	-0.0866526	0.0716258	-1,209,796,162	0.226357	0.722597
AFUB_089630	1,150,996,084	-0.0440137	0.0364072	-1,208,927,433	0.226691	0.722909
AFUB_091700	4,782,496,282	0.0768899	0.0635951	1,209,053,188	0.226642	0.722909
AFUB_069950	2,491,007,228	-0.0542092	0.0448611	-1,208,379,991	0.226901	0.723203
AFUB_038980	3,816,203,602	0.0656461	0.0544327	1,206,005,361	0.227815	0.72574
AFUB_064270	2,997,031,006	0.0797749	0.0662022	1,205,017,856	0.228196	0.726575
AFUB_094040	5,359,287,916	-0.0627919	0.0521822	-1,203,321,333	0.228852	0.728284
AFUB_029900	1,115,432,929	0.0434662	0.0361455	1,202,533,649	0.229157	0.728876
AFUB_099990	1,140,030,287	-0.0444077	0.0369648	-1,201,352,369	0.229615	0.729953
AFUB_001610	7,750,119,056	-0.0536923	0.0447215	-1,200,591,796	0.22991	0.729954
AFUB_050670	2,740,382,153	0.0780562	0.0650224	120,045,101	0.229964	0.729954
AFUB_066720	1,491,410,085	0.0403837	0.033641	1,200,429,807	0.229972	0.729954
AFUB_018310	8,147,645,797	0.0587393	0.0489513	1,199,954,922	0.230157	0.730161
AFUB_021840	2,806,932,674	-0.0863079	0.0720245	-119,831,399	0.230795	0.7311
AFUB_029620	3,125,379,081	-0.0956432	0.0798111	-1,198,369,867	0.230773	0.7311
AFUB_069540	2,908,317,839	-0.0740333	0.0617834	-1,198,272,353	0.230811	0.7311
AFUB_028060	2,995,123,242	0.0383962	0.0320572	119,774,143	0.231018	0.731377
AFUB_056200	3,254,067,342	0.0729835	0.0609597	1,197,243,358	0.231212	0.731613
AFUB_001760	8,234,428,989	-0.0522391	0.0436608	-1,196,476,955	0.23151	0.732151
AFUB_019840	498,139,558	-0.105684	0.0883498	-1,196,194,488	0.231621	0.732151
AFUB_028860	6,453,828,417	0.0577957	0.0483712	1,194,837,333	0.232151	0.732314
AFUB_032100	3,417,500,589	-0.0710972	0.0594611	-1,195,692,167	0.231817	0.732314
AFUB_073360	1,259,396,259	-0.0480321	0.0401821	-119,536,043	0.231946	0.732314
AFUB_076410	5,773,039,624	0.055571	0.0465047	1,194,955,484	0.232104	0.732314
AFUB_019630	3,696,975,482	0.0337945	0.0283339	1,192,722,367	0.232978	0.734169
AFUB_050400	8,248,848,087	-0.0525568	0.0440581	-1,192,896,321	0.23291	0.734169
AFUB_007050	9,254,426,905	0.0471383	0.0396119	1,190,002,333	0.234045	0.734369
AFUB_009110	1,754,440,421	0.0390919	0.0328429	1,190,267,855	0.233941	0.734369
AFUB_010650	9,819,182,144	-0.0372818	0.0313396	-1,189,605,906	0.234201	0.734369
AFUB_013210	1,035,452,233	0.050317	0.0422477	1,191,001,459	0.233653	0.734369
AFUB_015970	9,719,905,667	-0.0453091	0.0381239	-1,188,469,875	0.234648	0.734369
AFUB_021000	4,856,828,662	-0.0620177	0.0521138	-1,190,042,262	0.23403	0.734369
AFUB_044430	4,376,163,206	0.0672487	0.056483	1,190,601,834	0.23381	0.734369
AFUB_044920	1,054,378,878	-0.0538665	0.0452751	-1,189,759,244	0.234141	0.734369
AFUB_070070	5,066,289,869	-0.0642153	0.0538838	-1,191,735,169	0.233365	0.734369
AFUB_073700	3,685,961,443	0.0732074	0.0616025	118,838,357	0.234682	0.734369
AFUB_077270	432,184,823	-0.0761933	0.0641104	-1,188,470,356	0.234648	0.734369
AFUB_086140	859,969,583	-0.247997	0.208424	-1,189,868,395	0.234098	0.734369
AFUB_089980	7,667,827,701	-0.0550863	0.0463253	-1,189,120,589	0.234392	0.734369
AFUB_093100	2,433,532,034	-0.0833197	0.0701174	-1,188,288,291	0.23472	0.734369
AFUB_032000	2,900,119,585	-0.0745248	0.0627642	-1,187,378,861	0.235078	0.735114
AFUB_024770	4,452,498,614	-0.0618137	0.0521207	-118,597,268	0.235633	0.736474
AFUB_015170	4,251,475,057	-0.0628871	0.053113	-1,184,023,479	0.236404	0.736811
AFUB_028520	7,573,106,429	0.0484417	0.0409179	1,183,874,428	0.236463	0.736811
AFUB_040220	3,675,905,576	-0.0650563	0.0549069	-1,184,848,008	0.236078	0.736811
AFUB_081690	7,800,408,015	0.0503166	0.0424806	1,184,459,038	0.236231	0.736811
AFUB_090180	5,389,554,957	0.0658548	0.0556146	1,184,127,045	0.236363	0.736811
AFUB_096330	4,427,475,602	-0.0364431	0.0307812	-1,183,941,795	0.236436	0.736811
AFUB_009070	5,645,336,526	0.0575168	0.0486096	1,183,239,669	0.236714	0.736845
AFUB_012540	4,671,293,948	0.0644158	0.054427	1,183,525,912	0.236601	0.736845
AFUB_012440	1,338,517,779	0.0474295	0.0401047	1,182,642,245	0.236951	0.737043
AFUB_040510	3,470,305,741	-0.0680712	0.0576501	-1,180,764,653	0.237696	0.737043
AFUB_053160	5,931,981,888	0.068349	0.0578353	118,178,708	0.23729	0.737043
AFUB_058950	5,322,129,802	0.0321115	0.0271947	1,180,801,139	0.237682	0.737043
AFUB_070120	5,132,860,845	-0.0577574	0.0488564	-1,182,188,503	0.237131	0.737043
AFUB_073600	1,762,259,409	-0.0434189	0.0367753	-1,180,653,929	0.23774	0.737043
AFUB_073870	5,295,254,321	0.0578166	0.0489403	1,181,369,948	0.237456	0.737043
AFUB_074820	3,255,075,523	0.0751616	0.0636207	118,140,213	0.237443	0.737043
AFUB_047490	1,100,868,648	0.0443523	0.0375811	1,180,173,313	0.237931	0.737262
AFUB_053050	2,583,858,985	-0.0409548	0.0347173	-1,179,663,527	0.238134	0.737517
AFUB_015290	101,888,767	0.0542832	0.0461402	1,176,485,153	0.239401	0.738448
AFUB_029130	4,529,592,707	0.0591688	0.0503525	1,175,093,245	0.239957	0.738448
AFUB_032610	2,914,684,897	-0.039452	0.0335055	-1,177,476,059	0.239006	0.738448
AFUB_043060	2,771,683,689	0.082659	0.0702477	1,176,678,245	0.239324	0.738448
AFUB_044130	3,403,787,401	-0.0758412	0.0644771	-1,176,249,035	0.239495	0.738448
AFUB_046500	1,669,975,703	0.0361393	0.0307221	1,176,328,099	0.239464	0.738448
AFUB_057050	8,309,397,171	0.0501146	0.0426355	1,175,420,027	0.239827	0.738448
AFUB_058360	3,115,023,432	0.0779198	0.0663114	1,175,058,768	0.239971	0.738448
AFUB_070990	6,364,384,241	-0.0578405	0.0490849	-1,178,377,236	0.238646	0.738448
AFUB_076150	2,283,765,469	-0.0473024	0.040216	-1,176,208,444	0.239512	0.738448
AFUB_088510	5,571,283,753	0.0533035	0.0453683	1,174,907,861	0.240032	0.738448
AFUB_088550	7,387,390,244	-0.052981	0.0450958	-1,174,855,193	0.240053	0.738448
AFUB_088960	2,423,885,761	0.0873225	0.0743372	1,174,681,106	0.240122	0.738448
AFUB_099400	6,220,418,516	0.0656008	0.0557295	117,712,803	0.239144	0.738448
AFUB_031290	4,001,998,046	-0.0644791	0.0549434	-1,173,553,691	0.240574	0.739466
AFUB_076380	6,057,949,694	0.0553391	0.0471695	1,173,194,639	0.240718	0.739537
AFUB_021870	95,592,276	0.0482912	0.0412071	1,171,913,361	0.241232	0.740002
AFUB_041080	2,621,974,394	-0.0525768	0.0448431	-1,172,461,407	0.241012	0.740002
AFUB_074810	9,642,859,439	0.0449962	0.0384053	1,171,613,371	0.241352	0.740002
AFUB_079850	483,411,172	-0.0639451	0.0545771	-1,171,647,774	0.241338	0.740002
AFUB_038470	2,482,927,952	0.0995603	0.0850099	1,171,161,829	0.241534	0.740188
[truncated: 8,110 more rows]
