# Supplementary material for: Comprehensive mapping of the 5′ and 3′ untranslated regions of Aspergillus fumigatus reveals new insights into gene regulation
Source: bioRxiv preprint, doi:10.1101/2025.07.04.662582, version 1 (2025-07-04)
Supplement: Table_S3 [file 662582_file05.xlsx]

## Sheet: Table of content
After the initial filtering steps we assigned the closest genomic feature to the remaining End sites and calculated the distance. To do this we had to split data into the two strands.
Initially we gave each site a confidence value of 3 "high confidence, that this site is an end site of an annotated gene"
Every site which was more than 800 nt away from the the annotated translation start or stop codon, every site within the coding sequence as well as random other sites were manually checked for their plausability as an end site for an annotated gene
If they did not met our criterea we changed the confidence value to either 2 "pontential end site of an annotated gene, which needs further experimental validation" or 1 "unlikely a end site of an annoted gene"
This supplementary table contains the information about the genomic location of the end-site (first 3 collumns), to which gene (here called "feature) it was assigned to (collumn 7) and the distance in nt to its assigned start/stop codon (collumn 14)
Information is split between different sheets on the following criterea: 5' and 3' ends, and the 3 different confidence values
For the 5' ends on the forward (+) strand distances have a negative value because they are "upstream" of the start codon, while 5'end distances on the reverse (-) strand have a positive value because they are "downstream" of the start codon
For the 3' ends on the forward (+) strand distances have postitive values bacause they are "downstream" of the stop codon, while 3' end distances on the reverse (-) strand have a negative value because they are "upstream" of the start codon
end-sites with a distance of 0 are located with the annotated CDS and therefore the UTR does not have a length in relation to the annotated start/stop codon
for end-sites with a ? in the distance collumn the associated gene was manually changed as there were typcially 2 gene closely spaced together and their UTR is overlapping with the CDS of the up-/downstream gene

## Sheet: 5_end_confidence_3
Chromosome of END-site	Start-position of END-site	End-position of END-site	Choromosome of genomic feature	Start-position of genomic feature	End-position of genomic feature	gene	score	strand	source = European Nucleotide Archive	feature	frame	attribute	distance of the END-site to the feature	confidence value	comments
DS499594	76679	76680	DS499594	76694	76697	AFUB_000260	.	+	ena	start_codon	0	gene_id "AFUB_000260"; transcript_id "EDP55336"; exon_number "1"; gene_source "ena"; gene_biotype "protein_coding"; transcript_source "ena"; transcript_biotype "protein_coding";	15	3
DS499594	1424758	1424759	DS499594	1425387	1425390	AFUB_005090	.	+	ena	start_codon	0	gene_id "AFUB_005090"; transcript_id "EDP55813"; exon_number "1"; gene_source "ena"; gene_biotype "protein_coding"; transcript_source "ena"; transcript_biotype "protein_coding";	629	3
DS499594	3465606	3465607	DS499594	3466670	3466673	AFUB_012320	.	+	ena	start_codon	0	gene_id "AFUB_012320"; transcript_id "EDP56521"; exon_number "1"; gene_source "ena"; gene_biotype "protein_coding"; transcript_source "ena"; transcript_biotype "protein_coding";	1064	3
DS499595	831359	831360	DS499595	831824	831827	AFUB_020260	.	+	ena	start_codon	0	gene_id "AFUB_020260"; transcript_id "EDP53980"; exon_number "1"; gene_source "ena"; gene_biotype "protein_coding"; transcript_source "ena"; transcript_biotype "protein_coding";	465	3
DS499595	1020558	1020559	DS499595	1021251	1021254	AFUB_020930	.	+	ena	start_codon	0	gene_id "AFUB_020930"; transcript_id "EDP54043"; exon_number "1"; gene_source "ena"; gene_biotype "protein_coding"; transcript_source "ena"; transcript_biotype "protein_coding";	693	3
DS499595	2079456	2079457	DS499595	2079544	2079547	AFUB_024090	.	+	ena	start_codon	0	gene_id "AFUB_024090"; transcript_id "EDP54353"; exon_number "1"; gene_source "ena"; gene_biotype "protein_coding"; transcript_source "ena"; transcript_biotype "protein_coding";	88	3
DS499595	2454572	2454573	DS499595	2455071	2455074	AFUB_025510	.	+	ena	start_codon	0	gene_id "AFUB_025510"; transcript_id "EDP54494"; exon_number "1"; gene_source "ena"; gene_biotype "protein_coding"; transcript_source "ena"; transcript_biotype "protein_coding";	499	3
DS499595	3198995	3198996	DS499595	3199622	3199625	AFUB_028190	.	+	ena	start_codon	0	gene_id "AFUB_028190"; transcript_id "EDP54759"; exon_number "1"; gene_source "ena"; gene_biotype "protein_coding"; transcript_source "ena"; transcript_biotype "protein_coding";	627	3
DS499596	236268	236269	DS499596	237080	237083	AFUB_034820	.	+	ena	start_codon	0	gene_id "AFUB_034820"; transcript_id "EDP52318"; exon_number "1"; gene_source "ena"; gene_biotype "protein_coding"; transcript_source "ena"; transcript_biotype "protein_coding";	812	3
DS499596	1901064	1901065	DS499596	1901179	1901182	AFUB_040710	.	+	ena	start_codon	0	gene_id "AFUB_040710"; transcript_id "EDP52899"; exon_number "1"; gene_source "ena"; gene_biotype "protein_coding"; transcript_source "ena"; transcript_biotype "protein_coding";	115	3
DS499597	3526735	3526736	DS499597	3526930	3526933	AFUB_061490	.	+	ena	start_codon	0	gene_id "AFUB_061490"; transcript_id "EDP52113"; exon_number "1"; gene_source "ena"; gene_biotype "protein_coding"; transcript_source "ena"; transcript_biotype "protein_coding";	195	3
DS499598	1258232	1258233	DS499598	1259137	1259140	AFUB_067440	.	+	ena	start_codon	0	gene_id "AFUB_067440"; transcript_id "EDP50406"; exon_number "1"; gene_source "ena"; gene_biotype "protein_coding"; transcript_source "ena"; transcript_biotype "protein_coding";	905	3
DS499599	52444	52445	DS499599	53441	53444	AFUB_072390	.	+	ena	start_codon	0	gene_id "AFUB_072390"; transcript_id "EDP49213"; exon_number "1"; gene_source "ena"; gene_biotype "protein_coding"; transcript_source "ena"; transcript_biotype "protein_coding";	997	3
DS499602	191428	191429	DS499602	192590	192593	AFUB_093550	.	+	ena	start_codon	0	gene_id "AFUB_093550"; transcript_id "EDP47511"; exon_number "1"; gene_source "ena"; gene_biotype "protein_coding"; transcript_source "ena"; transcript_biotype "protein_coding";	1162	3
DS499602	984259	984260	DS499602	985683	985686	AFUB_096320	.	+	ena	start_codon	0	gene_id "AFUB_096320"; transcript_id "EDP47780"; exon_number "1"; gene_source "ena"; gene_biotype "protein_coding"; transcript_source "ena"; transcript_biotype "protein_coding";	1424	3
DS499595	1596626	1596627	DS499595	1596732	1596735	AFUB_022750	.	+	ena	start_codon	0	gene_id "AFUB_022750"; transcript_id "EDP54223"; exon_number "1"; gene_source "ena"; gene_biotype "protein_coding"; transcript_source "ena"; transcript_biotype "protein_coding";	106	3	main start site, but alternative start site is not reported
DS499595	3997886	3997887	DS499595	3997984	3997987	AFUB_030850	.	+	ena	start_codon	0	gene_id "AFUB_030850"; transcript_id "EDP55024"; exon_number "1"; gene_source "ena"; gene_biotype "protein_coding"; transcript_source "ena"; transcript_biotype "protein_coding";	98	3	main start site, but alternative start site is not reported
DS499596	3719412	3719413	DS499596	3719392	3719493	AFUB_046830	.	+	ena	CDS	0	gene_id "AFUB_046830"; transcript_id "EDP53503"; exon_number "1"; gene_source "ena"; gene_biotype "protein_coding"; transcript_source "ena"; transcript_biotype "protein_coding"; protein_id "EDP53503";	0	3	main start site, but alternative start site is not reported
DS499598	1895394	1895395	DS499598	1895257	1895605	AFUB_069630	.	+	ena	CDS	0	gene_id "AFUB_069630"; transcript_id "EDP50626"; exon_number "1"; gene_source "ena"; gene_biotype "protein_coding"; transcript_source "ena"; transcript_biotype "protein_coding"; protein_id "EDP50626";	0	3	main start site, but alternative start site is not reported
DS499598	1945357	1945358	DS499598	1945181	1946675	AFUB_069820	.	+	ena	CDS	0	gene_id "AFUB_069820"; transcript_id "EDP50645"; exon_number "1"; gene_source "ena"; gene_biotype "protein_coding"; transcript_source "ena"; transcript_biotype "protein_coding"; protein_id "EDP50645";	0	3	main start site, but alternative start site is not reported
DS499598	2356380	2356381	DS499598	2356422	2356425	AFUB_071410	.	+	ena	start_codon	0	gene_id "AFUB_071410"; transcript_id "EDP50800"; exon_number "1"; gene_source "ena"; gene_biotype "protein_coding"; transcript_source "ena"; transcript_biotype "protein_coding";	42	3	main start site, but alternative start site is not reported
DS499600	1856883	1856884	DS499600	1856477	1858414	AFUB_086160	.	+	ena	gene	.	gene_id "AFUB_086160"; gene_source "ena"; gene_biotype "protein_coding";	0	3	main start site, but alternative start site is not reported
DS499601	126593	126594	DS499601	126651	126654	AFUB_087060	.	+	ena	start_codon	0	gene_id "AFUB_087060"; transcript_id "EDP47997"; exon_number "1"; gene_source "ena"; gene_biotype "protein_coding"; transcript_source "ena"; transcript_biotype "protein_coding";	58	3	main start site, but alternative start site is not reported
DS499601	565160	565161	DS499601	564945	565787	AFUB_088670	.	+	ena	CDS	0	gene_id "AFUB_088670"; transcript_id "EDP48157"; exon_number "1"; gene_source "ena"; gene_biotype "protein_coding"; transcript_source "ena"; transcript_biotype "protein_coding"; protein_id "EDP48157";	0	3	main start site, but alternative start site is not reported
DS499594	2617087	2617088	DS499594	2616894	2618504	AFUB_009250	.	+	ena	gene	.	gene_id "AFUB_009250"; gene_source "ena"; gene_biotype "protein_coding";	0	3	alternative start site within intron? Or alternative splicing?
DS499596	1501361	1501362	DS499596	1502402	1502405	AFUB_039180	.	+	ena	start_codon	0	gene_id "AFUB_039180"; transcript_id "EDP52749"; exon_number "1"; gene_source "ena"; gene_biotype "protein_coding"; transcript_source "ena"; transcript_biotype "protein_coding";	1041	3	alternative start site; main start site not reported
DS499594	2091884	2091885	DS499594	2091623	2092718	AFUB_007460	.	+	ena	gene	.	gene_id "AFUB_007460"; gene_source "ena"; gene_biotype "protein_coding";	0	3
DS499594	4539321	4539322	DS499594	4538057	4539904	AFUB_016040	.	+	ena	gene	.	gene_id "AFUB_016040"; gene_source "ena"; gene_biotype "protein_coding";	0	3
DS499601	1747187	1747188	DS499601	1748086	1748089	AFUB_092590	.	+	ena	start_codon	0	gene_id "AFUB_092590"; transcript_id "EDP48541"; exon_number "1"; gene_source "ena"; gene_biotype "protein_coding"; transcript_source "ena"; transcript_biotype "protein_coding";	899	3
DS499594	927174	927175	DS499594	927379	927382	AFUB_003360	.	+	ena	start_codon	0	gene_id "AFUB_003360"; transcript_id "EDP55639"; exon_number "1"; gene_source "ena"; gene_biotype "protein_coding"; transcript_source "ena"; transcript_biotype "protein_coding";	205	3	main start site, but alternative start site is not reported
DS499594	1778293	1778294	DS499594	1778273	1778946	AFUB_006290	.	+	ena	CDS	0	gene_id "AFUB_006290"; transcript_id "EDP55927"; exon_number "1"; gene_source "ena"; gene_biotype "protein_coding"; transcript_source "ena"; transcript_biotype "protein_coding"; protein_id "EDP55927";	0	3	main start site, but alternative start site is not reported
DS499594	2172068	2172069	DS499594	2172414	2172417	AFUB_007740	.	+	ena	start_codon	0	gene_id "AFUB_007740"; transcript_id "EDP56072"; exon_number "1"; gene_source "ena"; gene_biotype "protein_coding"; transcript_source "ena"; transcript_biotype "protein_coding";	346	3	main start site, but alternative start site is not reported
DS499594	2616751	2616752	DS499594	2616894	2616897	AFUB_009250	.	+	ena	start_codon	0	gene_id "AFUB_009250"; transcript_id "EDP56217"; exon_number "1"; gene_source "ena"; gene_biotype "protein_coding"; transcript_source "ena"; transcript_biotype "protein_coding";	143	3	main start site, but alternative start site is not reported
DS499594	3159387	3159388	DS499594	3158599	3159439	AFUB_011200	.	+	ena	gene	.	gene_id "AFUB_011190"; gene_source "ena"; gene_biotype "protein_coding";	?	3	start site of AFUB_011200	manually changed the associated gene
DS499595	2284870	2284871	DS499595	2284558	2285292	AFUB_024880	.	+	ena	gene	.	gene_id "AFUB_024870"; gene_source "ena"; gene_biotype "protein_coding";	?	3	Start site of AFUB_024880	manually changed the associated gene
DS499599	298737	298738	DS499599	298409	298880	AFUB_073250	.	+	ena	gene	.	gene_id "AFUB_073250"; gene_source "ena"; gene_biotype "protein_coding";	0	3	start site of AFUB_073260? + alternative start site not reported
DS499599	528198	528199	DS499599	528011	528239	AFUB_074050	.	+	ena	CDS	0	gene_id "AFUB_074050"; transcript_id "EDP49378"; exon_number "1"; gene_source "ena"; gene_biotype "protein_coding"; transcript_source "ena"; transcript_biotype "protein_coding"; protein_id "EDP49378";	?	3	start site of AFUB_074060	manually changed the associated gene
DS499600	660366	660367	DS499600	660310	660512	AFUB_082080	.	+	ena	exon	.	gene_id "AFUB_082079"; transcript_id "EDP48765"; exon_number "1"; gene_source "ena"; gene_biotype "protein_coding"; transcript_source "ena"; transcript_biotype "protein_coding"; exon_id "EDP48765-1";	?	3	Start site of AFUB_082080	manually changed the associated gene
DS499597	1482885	1482886	DS499597	1484119	1484122	AFUB_054020	.	+	ena	start_codon	0	gene_id "AFUB_054020"; transcript_id "EDP51396"; exon_number "1"; gene_source "ena"; gene_biotype "protein_coding"; transcript_source "ena"; transcript_biotype "protein_coding";	1234	3
DS499595	3738460	3738461	DS499595	3738347	3739247	AFUB_030010	.	+	ena	CDS	0	gene_id "AFUB_030010"; transcript_id "EDP54941"; exon_number "1"; gene_source "ena"; gene_biotype "protein_coding"; transcript_source "ena"; transcript_biotype "protein_coding"; protein_id "EDP54941";	0	3	there's a gene transcribed in reverse additionaly
DS499596	2411961	2411962	DS499596	2411073	2412811	AFUB_042460	.	+	ena	gene	.	gene_id "AFUB_042460"; gene_source "ena"; gene_biotype "protein_coding";	0	3	two genes within annotation
DS499601	1603600	1603601	DS499601	1604448	1604451	AFUB_092140	.	+	ena	start_codon	0	gene_id "AFUB_092140"; transcript_id "EDP48497"; exon_number "1"; gene_source "ena"; gene_biotype "protein_coding"; transcript_source "ena"; transcript_biotype "protein_coding";	848	3	unannotated gene or nearly complete termination in 5'UTR
DS499594	89667	89668	DS499594	89692	89695	AFUB_000300	.	+	ena	start_codon	0	gene_id "AFUB_000300"; transcript_id "EDP55340"; exon_number "1"; gene_source "ena"; gene_biotype "protein_coding"; transcript_source "ena"; transcript_biotype "protein_coding";	25	3
DS499594	91290	91291	DS499594	91336	91339	AFUB_000310	.	+	ena	start_codon	0	gene_id "AFUB_000310"; transcript_id "EDP55341"; exon_number "1"; gene_source "ena"; gene_biotype "protein_coding"; transcript_source "ena"; transcript_biotype "protein_coding";	46	3
DS499594	117431	117432	DS499594	117459	117462	AFUB_000410	.	+	ena	start_codon	0	gene_id "AFUB_000410"; transcript_id "EDP55351"; exon_number "1"; gene_source "ena"; gene_biotype "protein_coding"; transcript_source "ena"; transcript_biotype "protein_coding";	28	3
DS499594	119686	119687	DS499594	119754	119757	AFUB_000420	.	+	ena	start_codon	0	gene_id "AFUB_000420"; transcript_id "EDP55352"; exon_number "1"; gene_source "ena"; gene_biotype "protein_coding"; transcript_source "ena"; transcript_biotype "protein_coding";	68	3
DS499594	124918	124919	DS499594	124961	124964	AFUB_000430	.	+	ena	start_codon	0	gene_id "AFUB_000430"; transcript_id "EDP55353"; exon_number "1"; gene_source "ena"; gene_biotype "protein_coding"; transcript_source "ena"; transcript_biotype "protein_coding";	43	3
DS499594	127418	127419	DS499594	127470	127473	AFUB_000440	.	+	ena	start_codon	0	gene_id "AFUB_000440"; transcript_id "EDP55354"; exon_number "1"; gene_source "ena"; gene_biotype "protein_coding"; transcript_source "ena"; transcript_biotype "protein_coding";	52	3
DS499594	140251	140252	DS499594	140479	140482	AFUB_000500	.	+	ena	start_codon	0	gene_id "AFUB_000500"; transcript_id "EDP55360"; exon_number "1"; gene_source "ena"; gene_biotype "protein_coding"; transcript_source "ena"; transcript_biotype "protein_coding";	228	3
DS499594	143371	143372	DS499594	143620	143623	AFUB_000510	.	+	ena	start_codon	0	gene_id "AFUB_000510"; transcript_id "EDP55361"; exon_number "1"; gene_source "ena"; gene_biotype "protein_coding"; transcript_source "ena"; transcript_biotype "protein_coding";	249	3
DS499594	153126	153127	DS499594	153218	153221	AFUB_000550	.	+	ena	start_codon	0	gene_id "AFUB_000550"; transcript_id "EDP55365"; exon_number "1"; gene_source "ena"; gene_biotype "protein_coding"; transcript_source "ena"; transcript_biotype "protein_coding";	92	3
DS499594	198628	198629	DS499594	198683	198686	AFUB_000760	.	+	ena	start_codon	0	gene_id "AFUB_000760"; transcript_id "EDP55385"; exon_number "1"; gene_source "ena"; gene_biotype "protein_coding"; transcript_source "ena"; transcript_biotype "protein_coding";	55	3
DS499594	217766	217767	DS499594	217826	217829	AFUB_000830	.	+	ena	start_codon	0	gene_id "AFUB_000830"; transcript_id "EDP55392"; exon_number "1"; gene_source "ena"; gene_biotype "protein_coding"; transcript_source "ena"; transcript_biotype "protein_coding";	60	3
DS499594	217782	217783	DS499594	217826	217829	AFUB_000830	.	+	ena	start_codon	0	gene_id "AFUB_000830"; transcript_id "EDP55392"; exon_number "1"; gene_source "ena"; gene_biotype "protein_coding"; transcript_source "ena"; transcript_biotype "protein_coding";	44	3
DS499594	241962	241963	DS499594	242087	242090	AFUB_000940	.	+	ena	start_codon	0	gene_id "AFUB_000940"; transcript_id "EDP55403"; exon_number "1"; gene_source "ena"; gene_biotype "protein_coding"; transcript_source "ena"; transcript_biotype "protein_coding";	125	3
DS499594	318501	318502	DS499594	318853	318856	AFUB_001190	.	+	ena	start_codon	0	gene_id "AFUB_001190"; transcript_id "EDP55427"; exon_number "1"; gene_source "ena"; gene_biotype "protein_coding"; transcript_source "ena"; transcript_biotype "protein_coding";	352	3
DS499594	322061	322062	DS499594	322174	322177	AFUB_001210	.	+	ena	start_codon	0	gene_id "AFUB_001210"; transcript_id "EDP55429"; exon_number "1"; gene_source "ena"; gene_biotype "protein_coding"; transcript_source "ena"; transcript_biotype "protein_coding";	113	3
DS499594	331890	331891	DS499594	332101	332104	AFUB_001250	.	+	ena	start_codon	0	gene_id "AFUB_001250"; transcript_id "EDP55432"; exon_number "1"; gene_source "ena"; gene_biotype "protein_coding"; transcript_source "ena"; transcript_biotype "protein_coding";	211	3
DS499594	334961	334962	DS499594	335017	335020	AFUB_001260	.	+	ena	start_codon	0	gene_id "AFUB_001260"; transcript_id "EDP55433"; exon_number "1"; gene_source "ena"; gene_biotype "protein_coding"; transcript_source "ena"; transcript_biotype "protein_coding";	56	3
DS499594	353963	353964	DS499594	354188	354191	AFUB_001340	.	+	ena	start_codon	0	gene_id "AFUB_001340"; transcript_id "EDP55441"; exon_number "1"; gene_source "ena"; gene_biotype "protein_coding"; transcript_source "ena"; transcript_biotype "protein_coding";	225	3
DS499594	358790	358791	DS499594	358867	358870	AFUB_001350	.	+	ena	start_codon	0	gene_id "AFUB_001350"; transcript_id "EDP55442"; exon_number "1"; gene_source "ena"; gene_biotype "protein_coding"; transcript_source "ena"; transcript_biotype "protein_coding";	77	3
DS499594	365198	365199	DS499594	365273	365276	AFUB_001370	.	+	ena	start_codon	0	gene_id "AFUB_001370"; transcript_id "EDP55444"; exon_number "1"; gene_source "ena"; gene_biotype "protein_coding"; transcript_source "ena"; transcript_biotype "protein_coding";	75	3
DS499594	389982	389983	DS499594	390055	390058	AFUB_001460	.	+	ena	start_codon	0	gene_id "AFUB_001460"; transcript_id "EDP55451"; exon_number "1"; gene_source "ena"; gene_biotype "protein_coding"; transcript_source "ena"; transcript_biotype "protein_coding";	73	3
DS499594	391439	391440	DS499594	391572	391575	AFUB_001470	.	+	ena	start_codon	0	gene_id "AFUB_001470"; transcript_id "EDP55452"; exon_number "1"; gene_source "ena"; gene_biotype "protein_coding"; transcript_source "ena"; transcript_biotype "protein_coding";	133	3
DS499594	405359	405360	DS499594	405929	405932	AFUB_001510	.	+	ena	start_codon	0	gene_id "AFUB_001510"; transcript_id "EDP55456"; exon_number "1"; gene_source "ena"; gene_biotype "protein_coding"; transcript_source "ena"; transcript_biotype "protein_coding";	570	3
DS499594	417666	417667	DS499594	417904	417907	AFUB_001540	.	+	ena	start_codon	0	gene_id "AFUB_001540"; transcript_id "EDP55459"; exon_number "1"; gene_source "ena"; gene_biotype "protein_coding"; transcript_source "ena"; transcript_biotype "protein_coding";	238	3
DS499594	446006	446007	DS499594	446243	446246	AFUB_001620	.	+	ena	start_codon	0	gene_id "AFUB_001620"; transcript_id "EDP55467"; exon_number "1"; gene_source "ena"; gene_biotype "protein_coding"; transcript_source "ena"; transcript_biotype "protein_coding";	237	3
DS499594	488078	488079	DS499594	488477	488480	AFUB_001750	.	+	ena	start_codon	0	gene_id "AFUB_001750"; transcript_id "EDP55480"; exon_number "1"; gene_source "ena"; gene_biotype "protein_coding"; transcript_source "ena"; transcript_biotype "protein_coding";	399	3
DS499594	512703	512704	DS499594	512742	512745	AFUB_001850	.	+	ena	start_codon	0	gene_id "AFUB_001850"; transcript_id "EDP55490"; exon_number "1"; gene_source "ena"; gene_biotype "protein_coding"; transcript_source "ena"; transcript_biotype "protein_coding";	39	3
DS499594	528467	528468	DS499594	528765	528768	AFUB_001900	.	+	ena	start_codon	0	gene_id "AFUB_001900"; transcript_id "EDP55495"; exon_number "1"; gene_source "ena"; gene_biotype "protein_coding"; transcript_source "ena"; transcript_biotype "protein_coding";	298	3
DS499594	538021	538022	DS499594	538164	538167	AFUB_001910	.	+	ena	start_codon	0	gene_id "AFUB_001910"; transcript_id "EDP55496"; exon_number "1"; gene_source "ena"; gene_biotype "protein_coding"; transcript_source "ena"; transcript_biotype "protein_coding";	143	3
DS499594	561581	561582	DS499594	561856	561859	AFUB_002010	.	+	ena	start_codon	0	gene_id "AFUB_002010"; transcript_id "EDP55506"; exon_number "1"; gene_source "ena"; gene_biotype "protein_coding"; transcript_source "ena"; transcript_biotype "protein_coding";	275	3
DS499594	569854	569855	DS499594	569875	569878	AFUB_002040	.	+	ena	start_codon	0	gene_id "AFUB_002040"; transcript_id "EDP55509"; exon_number "1"; gene_source "ena"; gene_biotype "protein_coding"; transcript_source "ena"; transcript_biotype "protein_coding";	21	3
DS499594	604564	604565	DS499594	604646	604649	AFUB_002190	.	+	ena	start_codon	0	gene_id "AFUB_002190"; transcript_id "EDP55524"; exon_number "1"; gene_source "ena"; gene_biotype "protein_coding"; transcript_source "ena"; transcript_biotype "protein_coding";	82	3
DS499594	617648	617649	DS499594	617696	617699	AFUB_002260	.	+	ena	start_codon	0	gene_id "AFUB_002260"; transcript_id "EDP55531"; exon_number "1"; gene_source "ena"; gene_biotype "protein_coding"; transcript_source "ena"; transcript_biotype "protein_coding";	48	3
DS499594	649973	649974	DS499594	650154	650157	AFUB_002330	.	+	ena	start_codon	0	gene_id "AFUB_002330"; transcript_id "EDP55538"; exon_number "1"; gene_source "ena"; gene_biotype "protein_coding"; transcript_source "ena"; transcript_biotype "protein_coding";	181	3
DS499594	673409	673410	DS499594	673449	673452	AFUB_002410	.	+	ena	start_codon	0	gene_id "AFUB_002410"; transcript_id "EDP55546"; exon_number "1"; gene_source "ena"; gene_biotype "protein_coding"; transcript_source "ena"; transcript_biotype "protein_coding";	40	3
DS499594	683596	683597	DS499594	683712	683715	AFUB_002450	.	+	ena	start_codon	0	gene_id "AFUB_002450"; transcript_id "EDP55550"; exon_number "1"; gene_source "ena"; gene_biotype "protein_coding"; transcript_source "ena"; transcript_biotype "protein_coding";	116	3
DS499594	694432	694433	DS499594	694555	694558	AFUB_002490	.	+	ena	start_codon	0	gene_id "AFUB_002490"; transcript_id "EDP55554"; exon_number "1"; gene_source "ena"; gene_biotype "protein_coding"; transcript_source "ena"; transcript_biotype "protein_coding";	123	3
DS499594	712761	712762	DS499594	712330	713385	AFUB_002540	.	+	ena	gene	.	gene_id "AFUB_002540"; gene_source "ena"; gene_biotype "protein_coding";	0	3
DS499594	720956	720957	DS499594	721399	721402	AFUB_002570	.	+	ena	start_codon	0	gene_id "AFUB_002570"; transcript_id "EDP55562"; exon_number "1"; gene_source "ena"; gene_biotype "protein_coding"; transcript_source "ena"; transcript_biotype "protein_coding";	443	3
DS499594	754222	754223	DS499594	754740	754743	AFUB_002730	.	+	ena	start_codon	0	gene_id "AFUB_002730"; transcript_id "EDP55578"; exon_number "1"; gene_source "ena"; gene_biotype "protein_coding"; transcript_source "ena"; transcript_biotype "protein_coding";	518	3
DS499594	774466	774467	DS499594	774555	774558	AFUB_002800	.	+	ena	start_codon	0	gene_id "AFUB_002800"; transcript_id "EDP55585"; exon_number "1"; gene_source "ena"; gene_biotype "protein_coding"; transcript_source "ena"; transcript_biotype "protein_coding";	89	3
DS499594	809862	809863	DS499594	809902	809905	AFUB_002910	.	+	ena	start_codon	0	gene_id "AFUB_002910"; transcript_id "EDP55596"; exon_number "1"; gene_source "ena"; gene_biotype "protein_coding"; transcript_source "ena"; transcript_biotype "protein_coding";	40	3
DS499594	825089	825090	DS499594	825291	825294	AFUB_002960	.	+	ena	start_codon	0	gene_id "AFUB_002960"; transcript_id "EDP55601"; exon_number "1"; gene_source "ena"; gene_biotype "protein_coding"; transcript_source "ena"; transcript_biotype "protein_coding";	202	3
DS499594	836467	836468	DS499594	836668	836671	AFUB_003010	.	+	ena	start_codon	0	gene_id "AFUB_003010"; transcript_id "EDP55606"; exon_number "1"; gene_source "ena"; gene_biotype "protein_coding"; transcript_source "ena"; transcript_biotype "protein_coding";	201	3
DS499594	855890	855891	DS499594	855941	855944	AFUB_003100	.	+	ena	start_codon	0	gene_id "AFUB_003100"; transcript_id "EDP55613"; exon_number "1"; gene_source "ena"; gene_biotype "protein_coding"; transcript_source "ena"; transcript_biotype "protein_coding";	51	3
DS499594	866939	866940	DS499594	867621	867624	AFUB_003150	.	+	ena	start_codon	0	gene_id "AFUB_003150"; transcript_id "EDP55618"; exon_number "1"; gene_source "ena"; gene_biotype "protein_coding"; transcript_source "ena"; transcript_biotype "protein_coding";	682	3
DS499594	902636	902637	DS499594	902500	902996	AFUB_003270	.	+	ena	CDS	0	gene_id "AFUB_003270"; transcript_id "EDP55630"; exon_number "1"; gene_source "ena"; gene_biotype "protein_coding"; transcript_source "ena"; transcript_biotype "protein_coding"; protein_id "EDP55630";	0	3
DS499594	905988	905989	DS499594	906260	906263	AFUB_003290	.	+	ena	start_codon	0	gene_id "AFUB_003290"; transcript_id "EDP55632"; exon_number "1"; gene_source "ena"; gene_biotype "protein_coding"; transcript_source "ena"; transcript_biotype "protein_coding";	272	3
DS499594	932399	932400	DS499594	932729	932732	AFUB_003380	.	+	ena	start_codon	0	gene_id "AFUB_003380"; transcript_id "EDP55641"; exon_number "1"; gene_source "ena"; gene_biotype "protein_coding"; transcript_source "ena"; transcript_biotype "protein_coding";	330	3
DS499594	941776	941777	DS499594	941916	941919	AFUB_003410	.	+	ena	start_codon	0	gene_id "AFUB_003410"; transcript_id "EDP55644"; exon_number "1"; gene_source "ena"; gene_biotype "protein_coding"; transcript_source "ena"; transcript_biotype "protein_coding";	140	3
DS499594	955046	955047	DS499594	955079	955082	AFUB_003460	.	+	ena	start_codon	0	gene_id "AFUB_003460"; transcript_id "EDP55649"; exon_number "1"; gene_source "ena"; gene_biotype "protein_coding"; transcript_source "ena"; transcript_biotype "protein_coding";	33	3
DS499594	955054	955055	DS499594	955079	955082	AFUB_003460	.	+	ena	start_codon	0	gene_id "AFUB_003460"; transcript_id "EDP55649"; exon_number "1"; gene_source "ena"; gene_biotype "protein_coding"; transcript_source "ena"; transcript_biotype "protein_coding";	25	3
DS499594	957423	957424	DS499594	957520	957523	AFUB_003480	.	+	ena	start_codon	0	gene_id "AFUB_003480"; transcript_id "EDP55651"; exon_number "1"; gene_source "ena"; gene_biotype "protein_coding"; transcript_source "ena"; transcript_biotype "protein_coding";	97	3
DS499594	963669	963670	DS499594	963779	963782	AFUB_003500	.	+	ena	start_codon	0	gene_id "AFUB_003500"; transcript_id "EDP55653"; exon_number "1"; gene_source "ena"; gene_biotype "protein_coding"; transcript_source "ena"; transcript_biotype "protein_coding";	110	3
DS499594	969507	969508	DS499594	969552	969555	AFUB_003520	.	+	ena	start_codon	0	gene_id "AFUB_003520"; transcript_id "EDP55655"; exon_number "1"; gene_source "ena"; gene_biotype "protein_coding"; transcript_source "ena"; transcript_biotype "protein_coding";	45	3
DS499594	978325	978326	DS499594	978458	978461	AFUB_003560	.	+	ena	start_codon	0	gene_id "AFUB_003560"; transcript_id "EDP55659"; exon_number "1"; gene_source "ena"; gene_biotype "protein_coding"; transcript_source "ena"; transcript_biotype "protein_coding";	133	3
DS499594	1015553	1015554	DS499594	1015871	1015874	AFUB_003640	.	+	ena	start_codon	0	gene_id "AFUB_003640"; transcript_id "EDP55667"; exon_number "1"; gene_source "ena"; gene_biotype "protein_coding"; transcript_source "ena"; transcript_biotype "protein_coding";	318	3
DS499594	1075125	1075126	DS499594	1075516	1075519	AFUB_003870	.	+	ena	start_codon	0	gene_id "AFUB_003870"; transcript_id "EDP55690"; exon_number "1"; gene_source "ena"; gene_biotype "protein_coding"; transcript_source "ena"; transcript_biotype "protein_coding";	391	3
DS499594	1086870	1086871	DS499594	1086960	1086963	AFUB_003920	.	+	ena	start_codon	0	gene_id "AFUB_003920"; transcript_id "EDP55695"; exon_number "1"; gene_source "ena"; gene_biotype "protein_coding"; transcript_source "ena"; transcript_biotype "protein_coding";	90	3
DS499594	1115767	1115768	DS499594	1115921	1115924	AFUB_004020	.	+	ena	start_codon	0	gene_id "AFUB_004020"; transcript_id "EDP55705"; exon_number "1"; gene_source "ena"; gene_biotype "protein_coding"; transcript_source "ena"; transcript_biotype "protein_coding";	154	3
DS499594	1129397	1129398	DS499594	1129544	1129547	AFUB_004040	.	+	ena	start_codon	0	gene_id "AFUB_004040"; transcript_id "EDP55707"; exon_number "1"; gene_source "ena"; gene_biotype "protein_coding"; transcript_source "ena"; transcript_biotype "protein_coding";	147	3
DS499594	1130843	1130844	DS499594	1130944	1130947	AFUB_004050	.	+	ena	start_codon	0	gene_id "AFUB_004050"; transcript_id "EDP55708"; exon_number "1"; gene_source "ena"; gene_biotype "protein_coding"; transcript_source "ena"; transcript_biotype "protein_coding";	101	3
DS499594	1136512	1136513	DS499594	1136665	1136668	AFUB_004070	.	+	ena	start_codon	0	gene_id "AFUB_004070"; transcript_id "EDP55710"; exon_number "1"; gene_source "ena"; gene_biotype "protein_coding"; transcript_source "ena"; transcript_biotype "protein_coding";	153	3
DS499594	1149257	1149258	DS499594	1149372	1149375	AFUB_004120	.	+	ena	start_codon	0	gene_id "AFUB_004120"; transcript_id "EDP55715"; exon_number "1"; gene_source "ena"; gene_biotype "protein_coding"; transcript_source "ena"; transcript_biotype "protein_coding";	115	3
DS499594	1181437	1181438	DS499594	1181393	1181486	AFUB_004220	.	+	ena	CDS	0	gene_id "AFUB_004220"; transcript_id "EDP55725"; exon_number "1"; gene_source "ena"; gene_biotype "protein_coding"; transcript_source "ena"; transcript_biotype "protein_coding"; protein_id "EDP55725";	0	3
DS499594	1185787	1185788	DS499594	1185822	1185825	AFUB_004240	.	+	ena	start_codon	0	gene_id "AFUB_004240"; transcript_id "EDP55727"; exon_number "1"; gene_source "ena"; gene_biotype "protein_coding"; transcript_source "ena"; transcript_biotype "protein_coding";	35	3
DS499594	1187640	1187641	DS499594	1188656	1188659	AFUB_004250	.	+	ena	start_codon	0	gene_id "AFUB_004250"; transcript_id "EDP55728"; exon_number "1"; gene_source "ena"; gene_biotype "protein_coding"; transcript_source "ena"; transcript_biotype "protein_coding";	1016	3
DS499594	1212750	1212751	DS499594	1212793	1212796	AFUB_004350	.	+	ena	start_codon	0	gene_id "AFUB_004350"; transcript_id "EDP55738"; exon_number "1"; gene_source "ena"; gene_biotype "protein_coding"; transcript_source "ena"; transcript_biotype "protein_coding";	43	3
DS499594	1215631	1215632	DS499594	1215845	1215848	AFUB_004360	.	+	ena	start_codon	0	gene_id "AFUB_004360"; transcript_id "EDP55739"; exon_number "1"; gene_source "ena"; gene_biotype "protein_coding"; transcript_source "ena"; transcript_biotype "protein_coding";	214	3
DS499594	1226221	1226222	DS499594	1226512	1226515	AFUB_004390	.	+	ena	start_codon	0	gene_id "AFUB_004390"; transcript_id "EDP55742"; exon_number "1"; gene_source "ena"; gene_biotype "protein_coding"; transcript_source "ena"; transcript_biotype "protein_coding";	291	3
DS499594	1228163	1228164	DS499594	1228197	1228200	AFUB_004400	.	+	ena	start_codon	0	gene_id "AFUB_004400"; transcript_id "EDP55743"; exon_number "1"; gene_source "ena"; gene_biotype "protein_coding"; transcript_source "ena"; transcript_biotype "protein_coding";	34	3
DS499594	1234691	1234692	DS499594	1234942	1234945	AFUB_004440	.	+	ena	start_codon	0	gene_id "AFUB_004440"; transcript_id "EDP55747"; exon_number "1"; gene_source "ena"; gene_biotype "protein_coding"; transcript_source "ena"; transcript_biotype "protein_coding";	251	3
DS499594	1265735	1265736	DS499594	1265770	1265773	AFUB_004489	.	+	ena	start_codon	0	gene_id "AFUB_004489"; transcript_id "EDP55752"; exon_number "1"; gene_source "ena"; gene_biotype "protein_coding"; transcript_source "ena"; transcript_biotype "protein_coding";	35	3
DS499594	1272454	1272455	DS499594	1274343	1274346	AFUB_004520	.	+	ena	start_codon	0	gene_id "AFUB_004520"; transcript_id "EDP55756"; exon_number "1"; gene_source "ena"; gene_biotype "protein_coding"; transcript_source "ena"; transcript_biotype "protein_coding";	1889	3
DS499594	1284191	1284192	DS499594	1284308	1284311	AFUB_004570	.	+	ena	start_codon	0	gene_id "AFUB_004570"; transcript_id "EDP55761"; exon_number "1"; gene_source "ena"; gene_biotype "protein_coding"; transcript_source "ena"; transcript_biotype "protein_coding";	117	3
DS499594	1287623	1287624	DS499594	1287651	1287654	AFUB_004580	.	+	ena	start_codon	0	gene_id "AFUB_004580"; transcript_id "EDP55762"; exon_number "1"; gene_source "ena"; gene_biotype "protein_coding"; transcript_source "ena"; transcript_biotype "protein_coding";	28	3
DS499594	1297826	1297827	DS499594	1298453	1298456	AFUB_004620	.	+	ena	start_codon	0	gene_id "AFUB_004620"; transcript_id "EDP55766"; exon_number "1"; gene_source "ena"; gene_biotype "protein_coding"; transcript_source "ena"; transcript_biotype "protein_coding";	627	3
DS499594	1304632	1304633	DS499594	1304850	1304853	AFUB_004650	.	+	ena	start_codon	0	gene_id "AFUB_004650"; transcript_id "EDP55769"; exon_number "1"; gene_source "ena"; gene_biotype "protein_coding"; transcript_source "ena"; transcript_biotype "protein_coding";	218	3
DS499594	1305764	1305765	DS499594	1306209	1306212	AFUB_004660	.	+	ena	start_codon	0	gene_id "AFUB_004660"; transcript_id "EDP55770"; exon_number "1"; gene_source "ena"; gene_biotype "protein_coding"; transcript_source "ena"; transcript_biotype "protein_coding";	445	3
DS499594	1325437	1325438	DS499594	1325514	1325517	AFUB_004710	.	+	ena	start_codon	0	gene_id "AFUB_004710"; transcript_id "EDP55775"; exon_number "1"; gene_source "ena"; gene_biotype "protein_coding"; transcript_source "ena"; transcript_biotype "protein_coding";	77	3
DS499594	1329717	1329718	DS499594	1330107	1330110	AFUB_004730	.	+	ena	start_codon	0	gene_id "AFUB_004730"; transcript_id "EDP55777"; exon_number "1"; gene_source "ena"; gene_biotype "protein_coding"; transcript_source "ena"; transcript_biotype "protein_coding";	390	3
DS499594	1338509	1338510	DS499594	1338783	1338786	AFUB_004780	.	+	ena	start_codon	0	gene_id "AFUB_004780"; transcript_id "EDP55782"; exon_number "1"; gene_source "ena"; gene_biotype "protein_coding"; transcript_source "ena"; transcript_biotype "protein_coding";	274	3
DS499594	1348726	1348727	DS499594	1348890	1348893	AFUB_004820	.	+	ena	start_codon	0	gene_id "AFUB_004820"; transcript_id "EDP55786"; exon_number "1"; gene_source "ena"; gene_biotype "protein_coding"; transcript_source "ena"; transcript_biotype "protein_coding";	164	3
DS499594	1360288	1360289	DS499594	1360738	1360741	AFUB_004870	.	+	ena	start_codon	0	gene_id "AFUB_004870"; transcript_id "EDP55791"; exon_number "1"; gene_source "ena"; gene_biotype "protein_coding"; transcript_source "ena"; transcript_biotype "protein_coding";	450	3
DS499594	1362056	1362057	DS499594	1362134	1362137	AFUB_004880	.	+	ena	start_codon	0	gene_id "AFUB_004880"; transcript_id "EDP55792"; exon_number "1"; gene_source "ena"; gene_biotype "protein_coding"; transcript_source "ena"; transcript_biotype "protein_coding";	78	3
DS499594	1365137	1365138	DS499594	1365243	1365246	AFUB_004890	.	+	ena	start_codon	0	gene_id "AFUB_004890"; transcript_id "EDP55793"; exon_number "1"; gene_source "ena"; gene_biotype "protein_coding"; transcript_source "ena"; transcript_biotype "protein_coding";	106	3
DS499594	1367357	1367358	DS499594	1367517	1367520	AFUB_004900	.	+	ena	start_codon	0	gene_id "AFUB_004900"; transcript_id "EDP55794"; exon_number "1"; gene_source "ena"; gene_biotype "protein_coding"; transcript_source "ena"; transcript_biotype "protein_coding";	160	3
DS499594	1377356	1377357	DS499594	1378210	1378213	AFUB_004920	.	+	ena	start_codon	0	gene_id "AFUB_004920"; transcript_id "EDP55796"; exon_number "1"; gene_source "ena"; gene_biotype "protein_coding"; transcript_source "ena"; transcript_biotype "protein_coding";	854	3
DS499594	1379643	1379644	DS499594	1379834	1379837	AFUB_004930	.	+	ena	start_codon	0	gene_id "AFUB_004930"; transcript_id "EDP55797"; exon_number "1"; gene_source "ena"; gene_biotype "protein_coding"; transcript_source "ena"; transcript_biotype "protein_coding";	191	3
DS499594	1409805	1409806	DS499594	1409969	1409972	AFUB_005030	.	+	ena	start_codon	0	gene_id "AFUB_005030"; transcript_id "EDP55807"; exon_number "1"; gene_source "ena"; gene_biotype "protein_coding"; transcript_source "ena"; transcript_biotype "protein_coding";	164	3
DS499594	1425646	1425647	DS499594	1425387	1426668	AFUB_005090	.	+	ena	CDS	0	gene_id "AFUB_005090"; transcript_id "EDP55813"; exon_number "1"; gene_source "ena"; gene_biotype "protein_coding"; transcript_source "ena"; transcript_biotype "protein_coding"; protein_id "EDP55813";	0	3
DS499594	1438880	1438881	DS499594	1439059	1439062	AFUB_005130	.	+	ena	start_codon	0	gene_id "AFUB_005130"; transcript_id "EDP55817"; exon_number "1"; gene_source "ena"; gene_biotype "protein_coding"; transcript_source "ena"; transcript_biotype "protein_coding";	179	3
DS499594	1454016	1454017	DS499594	1453926	1454720	AFUB_005190	.	+	ena	gene	.	gene_id "AFUB_005190"; gene_source "ena"; gene_biotype "protein_coding";	0	3
DS499594	1455332	1455333	DS499594	1455396	1455399	AFUB_005200	.	+	ena	start_codon	0	gene_id "AFUB_005200"; transcript_id "EDP55824"; exon_number "1"; gene_source "ena"; gene_biotype "protein_coding"; transcript_source "ena"; transcript_biotype "protein_coding";	64	3
DS499594	1462609	1462610	DS499594	1463116	1463119	AFUB_005240	.	+	ena	start_codon	0	gene_id "AFUB_005240"; transcript_id "EDP55826"; exon_number "1"; gene_source "ena"; gene_biotype "protein_coding"; transcript_source "ena"; transcript_biotype "protein_coding";	507	3
DS499594	1465132	1465133	DS499594	1465401	1465404	AFUB_005250	.	+	ena	start_codon	0	gene_id "AFUB_005250"; transcript_id "EDP55827"; exon_number "1"; gene_source "ena"; gene_biotype "protein_coding"; transcript_source "ena"; transcript_biotype "protein_coding";	269	3
DS499594	1484524	1484525	DS499594	1485005	1485008	AFUB_005300	.	+	ena	start_codon	0	gene_id "AFUB_005300"; transcript_id "EDP55831"; exon_number "1"; gene_source "ena"; gene_biotype "protein_coding"; transcript_source "ena"; transcript_biotype "protein_coding";	481	3
DS499594	1487799	1487800	DS499594	1487897	1487900	AFUB_005310	.	+	ena	start_codon	0	gene_id "AFUB_005310"; transcript_id "EDP55832"; exon_number "1"; gene_source "ena"; gene_biotype "protein_coding"; transcript_source "ena"; transcript_biotype "protein_coding";	98	3
DS499594	1509891	1509892	DS499594	1510591	1510594	AFUB_005360	.	+	ena	start_codon	0	gene_id "AFUB_005360"; transcript_id "EDP55837"; exon_number "1"; gene_source "ena"; gene_biotype "protein_coding"; transcript_source "ena"; transcript_biotype "protein_coding";	700	3
DS499594	1513056	1513057	DS499594	1513209	1513212	AFUB_005370	.	+	ena	start_codon	0	gene_id "AFUB_005370"; transcript_id "EDP55838"; exon_number "1"; gene_source "ena"; gene_biotype "protein_coding"; transcript_source "ena"; transcript_biotype "protein_coding";	153	3
DS499594	1539564	1539565	DS499594	1539915	1539918	AFUB_005480	.	+	ena	start_codon	0	gene_id "AFUB_005480"; transcript_id "EDP55848"; exon_number "1"; gene_source "ena"; gene_biotype "protein_coding"; transcript_source "ena"; transcript_biotype "protein_coding";	351	3
DS499594	1554759	1554760	DS499594	1554896	1554899	AFUB_005520	.	+	ena	start_codon	0	gene_id "AFUB_005520"; transcript_id "EDP55852"; exon_number "1"; gene_source "ena"; gene_biotype "protein_coding"; transcript_source "ena"; transcript_biotype "protein_coding";	137	3
DS499594	1556646	1556647	DS499594	1557581	1557584	AFUB_005530	.	+	ena	start_codon	0	gene_id "AFUB_005530"; transcript_id "EDP55853"; exon_number "1"; gene_source "ena"; gene_biotype "protein_coding"; transcript_source "ena"; transcript_biotype "protein_coding";	935	3
DS499594	1567466	1567467	DS499594	1567598	1567601	AFUB_005570	.	+	ena	start_codon	0	gene_id "AFUB_005570"; transcript_id "EDP55857"; exon_number "1"; gene_source "ena"; gene_biotype "protein_coding"; transcript_source "ena"; transcript_biotype "protein_coding";	132	3
DS499594	1568925	1568926	DS499594	1569007	1569010	AFUB_005580	.	+	ena	start_codon	0	gene_id "AFUB_005580"; transcript_id "EDP55858"; exon_number "1"; gene_source "ena"; gene_biotype "protein_coding"; transcript_source "ena"; transcript_biotype "protein_coding";	82	3
DS499594	1568929	1568930	DS499594	1569007	1569010	AFUB_005580	.	+	ena	start_codon	0	gene_id "AFUB_005580"; transcript_id "EDP55858"; exon_number "1"; gene_source "ena"; gene_biotype "protein_coding"; transcript_source "ena"; transcript_biotype "protein_coding";	78	3
DS499594	1600650	1600651	DS499594	1600772	1600775	AFUB_005640	.	+	ena	start_codon	0	gene_id "AFUB_005640"; transcript_id "EDP55864"; exon_number "1"; gene_source "ena"; gene_biotype "protein_coding"; transcript_source "ena"; transcript_biotype "protein_coding";	122	3
DS499594	1614712	1614713	DS499594	1614810	1614813	AFUB_005690	.	+	ena	start_codon	0	gene_id "AFUB_005690"; transcript_id "EDP55869"; exon_number "1"; gene_source "ena"; gene_biotype "protein_coding"; transcript_source "ena"; transcript_biotype "protein_coding";	98	3
DS499594	1648197	1648198	DS499594	1648566	1648569	AFUB_005840	.	+	ena	start_codon	0	gene_id "AFUB_005840"; transcript_id "EDP55884"; exon_number "1"; gene_source "ena"; gene_biotype "protein_coding"; transcript_source "ena"; transcript_biotype "protein_coding";	369	3
DS499594	1688545	1688546	DS499594	1688718	1688721	AFUB_005990	.	+	ena	start_codon	0	gene_id "AFUB_005990"; transcript_id "EDP55897"; exon_number "1"; gene_source "ena"; gene_biotype "protein_coding"; transcript_source "ena"; transcript_biotype "protein_coding";	173	3
DS499594	1713038	1713039	DS499594	1713677	1713680	AFUB_006050	.	+	ena	start_codon	0	gene_id "AFUB_006050"; transcript_id "EDP55904"; exon_number "1"; gene_source "ena"; gene_biotype "protein_coding"; transcript_source "ena"; transcript_biotype "protein_coding";	639	3
DS499594	1723739	1723740	DS499594	1723900	1723903	AFUB_006100	.	+	ena	start_codon	0	gene_id "AFUB_006100"; transcript_id "EDP55909"; exon_number "1"; gene_source "ena"; gene_biotype "protein_coding"; transcript_source "ena"; transcript_biotype "protein_coding";	161	3
DS499594	1759005	1759006	DS499594	1759053	1759056	AFUB_006210	.	+	ena	start_codon	0	gene_id "AFUB_006210"; transcript_id "EDP55919"; exon_number "1"; gene_source "ena"; gene_biotype "protein_coding"; transcript_source "ena"; transcript_biotype "protein_coding";	48	3
DS499594	1760754	1760755	DS499594	1761257	1761260	AFUB_006220	.	+	ena	start_codon	0	gene_id "AFUB_006220"; transcript_id "EDP55920"; exon_number "1"; gene_source "ena"; gene_biotype "protein_coding"; transcript_source "ena"; transcript_biotype "protein_coding";	503	3
DS499594	1790978	1790979	DS499594	1791016	1791019	AFUB_006330	.	+	ena	start_codon	0	gene_id "AFUB_006330"; transcript_id "EDP55931"; exon_number "1"; gene_source "ena"; gene_biotype "protein_coding"; transcript_source "ena"; transcript_biotype "protein_coding";	38	3
DS499594	1813782	1813783	DS499594	1813860	1813863	AFUB_006400	.	+	ena	start_codon	0	gene_id "AFUB_006400"; transcript_id "EDP55938"; exon_number "1"; gene_source "ena"; gene_biotype "protein_coding"; transcript_source "ena"; transcript_biotype "protein_coding";	78	3
DS499594	1832874	1832875	DS499594	1833216	1833219	AFUB_006450	.	+	ena	start_codon	0	gene_id "AFUB_006450"; transcript_id "EDP55943"; exon_number "1"; gene_source "ena"; gene_biotype "protein_coding"; transcript_source "ena"; transcript_biotype "protein_coding";	342	3
DS499594	1837943	1837944	DS499594	1838598	1838601	AFUB_006470	.	+	ena	start_codon	0	gene_id "AFUB_006470"; transcript_id "EDP55945"; exon_number "1"; gene_source "ena"; gene_biotype "protein_coding"; transcript_source "ena"; transcript_biotype "protein_coding";	655	3
DS499594	1841086	1841087	DS499594	1841191	1841194	AFUB_006480	.	+	ena	start_codon	0	gene_id "AFUB_006480"; transcript_id "EDP55946"; exon_number "1"; gene_source "ena"; gene_biotype "protein_coding"; transcript_source "ena"; transcript_biotype "protein_coding";	105	3
DS499594	1871471	1871472	DS499594	1871552	1871555	AFUB_006610	.	+	ena	start_codon	0	gene_id "AFUB_006610"; transcript_id "EDP55959"; exon_number "1"; gene_source "ena"; gene_biotype "protein_coding"; transcript_source "ena"; transcript_biotype "protein_coding";	81	3
DS499594	1874656	1874657	DS499594	1874793	1874796	AFUB_006630	.	+	ena	start_codon	0	gene_id "AFUB_006630"; transcript_id "EDP55961"; exon_number "1"; gene_source "ena"; gene_biotype "protein_coding"; transcript_source "ena"; transcript_biotype "protein_coding";	137	3
DS499594	1885851	1885852	DS499594	1885957	1885960	AFUB_006690	.	+	ena	start_codon	0	gene_id "AFUB_006690"; transcript_id "EDP55967"; exon_number "1"; gene_source "ena"; gene_biotype "protein_coding"; transcript_source "ena"; transcript_biotype "protein_coding";	106	3
DS499594	1897340	1897341	DS499594	1897240	1897400	AFUB_006720	.	+	ena	CDS	0	gene_id "AFUB_006720"; transcript_id "EDP55970"; exon_number "1"; gene_source "ena"; gene_biotype "protein_coding"; transcript_source "ena"; transcript_biotype "protein_coding"; protein_id "EDP55970";	0	3
DS499594	1900928	1900929	DS499594	1901123	1901126	AFUB_006730	.	+	ena	start_codon	0	gene_id "AFUB_006730"; transcript_id "EDP55971"; exon_number "1"; gene_source "ena"; gene_biotype "protein_coding"; transcript_source "ena"; transcript_biotype "protein_coding";	195	3
DS499594	1943536	1943537	DS499594	1943615	1943618	AFUB_006890	.	+	ena	start_codon	0	gene_id "AFUB_006890"; transcript_id "EDP55987"; exon_number "1"; gene_source "ena"; gene_biotype "protein_coding"; transcript_source "ena"; transcript_biotype "protein_coding";	79	3
DS499594	1965167	1965168	DS499594	1965276	1965279	AFUB_006980	.	+	ena	start_codon	0	gene_id "AFUB_006980"; transcript_id "EDP55996"; exon_number "1"; gene_source "ena"; gene_biotype "protein_coding"; transcript_source "ena"; transcript_biotype "protein_coding";	109	3
DS499594	1968894	1968895	DS499594	1969044	1969047	AFUB_007000	.	+	ena	start_codon	0	gene_id "AFUB_007000"; transcript_id "EDP55998"; exon_number "1"; gene_source "ena"; gene_biotype "protein_coding"; transcript_source "ena"; transcript_biotype "protein_coding";	150	3
DS499594	1980032	1980033	DS499594	1980221	1980224	AFUB_007050	.	+	ena	start_codon	0	gene_id "AFUB_007050"; transcript_id "EDP56003"; exon_number "1"; gene_source "ena"; gene_biotype "protein_coding"; transcript_source "ena"; transcript_biotype "protein_coding";	189	3
DS499594	1991537	1991538	DS499594	1991631	1991634	AFUB_007080	.	+	ena	start_codon	0	gene_id "AFUB_007080"; transcript_id "EDP56006"; exon_number "1"; gene_source "ena"; gene_biotype "protein_coding"; transcript_source "ena"; transcript_biotype "protein_coding";	94	3
DS499594	2012705	2012706	DS499594	2013060	2013063	AFUB_007170	.	+	ena	start_codon	0	gene_id "AFUB_007170"; transcript_id "EDP56015"; exon_number "1"; gene_source "ena"; gene_biotype "protein_coding"; transcript_source "ena"; transcript_biotype "protein_coding";	355	3
DS499594	2023824	2023825	DS499594	2023874	2023877	AFUB_007210	.	+	ena	start_codon	0	gene_id "AFUB_007210"; transcript_id "EDP56019"; exon_number "1"; gene_source "ena"; gene_biotype "protein_coding"; transcript_source "ena"; transcript_biotype "protein_coding";	50	3
DS499594	2029690	2029691	DS499594	2029771	2029774	AFUB_007240	.	+	ena	start_codon	0	gene_id "AFUB_007240"; transcript_id "EDP56022"; exon_number "1"; gene_source "ena"; gene_biotype "protein_coding"; transcript_source "ena"; transcript_biotype "protein_coding";	81	3
DS499594	2035200	2035201	DS499594	2035304	2035307	AFUB_007270	.	+	ena	start_codon	0	gene_id "AFUB_007270"; transcript_id "EDP56025"; exon_number "1"; gene_source "ena"; gene_biotype "protein_coding"; transcript_source "ena"; transcript_biotype "protein_coding";	104	3
DS499594	2059319	2059320	DS499594	2059355	2059358	AFUB_007330	.	+	ena	start_codon	0	gene_id "AFUB_007330"; transcript_id "EDP56031"; exon_number "1"; gene_source "ena"; gene_biotype "protein_coding"; transcript_source "ena"; transcript_biotype "protein_coding";	36	3
DS499594	2082193	2082194	DS499594	2082458	2082461	AFUB_007430	.	+	ena	start_codon	0	gene_id "AFUB_007430"; transcript_id "EDP56041"; exon_number "1"; gene_source "ena"; gene_biotype "protein_coding"; transcript_source "ena"; transcript_biotype "protein_coding";	265	3
DS499594	2092300	2092301	DS499594	2091623	2092718	AFUB_007460	.	+	ena	gene	.	gene_id "AFUB_007460"; gene_source "ena"; gene_biotype "protein_coding";	0	3
DS499594	2104284	2104285	DS499594	2104655	2104658	AFUB_007510	.	+	ena	start_codon	0	gene_id "AFUB_007510"; transcript_id "EDP56049"; exon_number "1"; gene_source "ena"; gene_biotype "protein_coding"; transcript_source "ena"; transcript_biotype "protein_coding";	371	3
DS499594	2122298	2122299	DS499594	2122492	2122495	AFUB_007570	.	+	ena	start_codon	0	gene_id "AFUB_007570"; transcript_id "EDP56055"; exon_number "1"; gene_source "ena"; gene_biotype "protein_coding"; transcript_source "ena"; transcript_biotype "protein_coding";	194	3
DS499594	2124446	2124447	DS499594	2125011	2125014	AFUB_007580	.	+	ena	start_codon	0	gene_id "AFUB_007580"; transcript_id "EDP56056"; exon_number "1"; gene_source "ena"; gene_biotype "protein_coding"; transcript_source "ena"; transcript_biotype "protein_coding";	565	3
DS499594	2124645	2124646	DS499594	2125011	2125014	AFUB_007580	.	+	ena	start_codon	0	gene_id "AFUB_007580"; transcript_id "EDP56056"; exon_number "1"; gene_source "ena"; gene_biotype "protein_coding"; transcript_source "ena"; transcript_biotype "protein_coding";	366	3
DS499594	2140354	2140355	DS499594	2140552	2140555	AFUB_007640	.	+	ena	start_codon	0	gene_id "AFUB_007640"; transcript_id "EDP56062"; exon_number "1"; gene_source "ena"; gene_biotype "protein_coding"; transcript_source "ena"; transcript_biotype "protein_coding";	198	3
DS499594	2143043	2143044	DS499594	2143163	2143166	AFUB_007650	.	+	ena	start_codon	0	gene_id "AFUB_007650"; transcript_id "EDP56063"; exon_number "1"; gene_source "ena"; gene_biotype "protein_coding"; transcript_source "ena"; transcript_biotype "protein_coding";	120	3
DS499594	2157449	2157450	DS499594	2157485	2157488	AFUB_007710	.	+	ena	start_codon	0	gene_id "AFUB_007710"; transcript_id "EDP56069"; exon_number "1"; gene_source "ena"; gene_biotype "protein_coding"; transcript_source "ena"; transcript_biotype "protein_coding";	36	3
DS499594	2178139	2178140	DS499594	2178314	2178317	AFUB_007770	.	+	ena	start_codon	0	gene_id "AFUB_007770"; transcript_id "EDP56075"; exon_number "1"; gene_source "ena"; gene_biotype "protein_coding"; transcript_source "ena"; transcript_biotype "protein_coding";	175	3
DS499594	2185683	2185684	DS499594	2185653	2185866	AFUB_007800	.	+	ena	CDS	0	gene_id "AFUB_007800"; transcript_id "EDP56078"; exon_number "1"; gene_source "ena"; gene_biotype "protein_coding"; transcript_source "ena"; transcript_biotype "protein_coding"; protein_id "EDP56078";	0	3
DS499594	2198557	2198558	DS499594	2198731	2198734	AFUB_007860	.	+	ena	start_codon	0	gene_id "AFUB_007860"; transcript_id "EDP56084"; exon_number "1"; gene_source "ena"; gene_biotype "protein_coding"; transcript_source "ena"; transcript_biotype "protein_coding";	174	3
DS499594	2214479	2214480	DS499594	2214954	2214957	AFUB_007900	.	+	ena	start_codon	0	gene_id "AFUB_007900"; transcript_id "EDP56089"; exon_number "1"; gene_source "ena"; gene_biotype "protein_coding"; transcript_source "ena"; transcript_biotype "protein_coding";	475	3
DS499594	2219189	2219190	DS499594	2219300	2219303	AFUB_007920	.	+	ena	start_codon	0	gene_id "AFUB_007920"; transcript_id "EDP56091"; exon_number "1"; gene_source "ena"; gene_biotype "protein_coding"; transcript_source "ena"; transcript_biotype "protein_coding";	111	3
DS499594	2226026	2226027	DS499594	2226648	2226651	AFUB_007950	.	+	ena	start_codon	0	gene_id "AFUB_007950"; transcript_id "EDP56094"; exon_number "1"; gene_source "ena"; gene_biotype "protein_coding"; transcript_source "ena"; transcript_biotype "protein_coding";	622	3
DS499594	2254919	2254920	DS499594	2255099	2255102	AFUB_008050	.	+	ena	start_codon	0	gene_id "AFUB_008050"; transcript_id "EDP56104"; exon_number "1"; gene_source "ena"; gene_biotype "protein_coding"; transcript_source "ena"; transcript_biotype "protein_coding";	180	3
DS499594	2284878	2284879	DS499594	2284965	2284968	AFUB_008090	.	+	ena	start_codon	0	gene_id "AFUB_008090"; transcript_id "EDP56108"; exon_number "1"; gene_source "ena"; gene_biotype "protein_coding"; transcript_source "ena"; transcript_biotype "protein_coding";	87	3
DS499594	2324770	2324771	DS499594	2324803	2324806	AFUB_008100	.	+	ena	start_codon	0	gene_id "AFUB_008100"; transcript_id "EDP56109"; exon_number "1"; gene_source "ena"; gene_biotype "protein_coding"; transcript_source "ena"; transcript_biotype "protein_coding";	33	3
DS499594	2335849	2335850	DS499594	2335881	2335884	AFUB_008140	.	+	ena	start_codon	0	gene_id "AFUB_008140"; transcript_id "EDP56113"; exon_number "1"; gene_source "ena"; gene_biotype "protein_coding"; transcript_source "ena"; transcript_biotype "protein_coding";	32	3
DS499594	2361994	2361995	DS499594	2362006	2362009	AFUB_008250	.	+	ena	start_codon	0	gene_id "AFUB_008250"; transcript_id "EDP56119"; exon_number "1"; gene_source "ena"; gene_biotype "protein_coding"; transcript_source "ena"; transcript_biotype "protein_coding";	12	3
DS499594	2365231	2365232	DS499594	2365375	2365378	AFUB_008270	.	+	ena	start_codon	0	gene_id "AFUB_008270"; transcript_id "EDP56121"; exon_number "1"; gene_source "ena"; gene_biotype "protein_coding"; transcript_source "ena"; transcript_biotype "protein_coding";	144	3
DS499594	2366180	2366181	DS499594	2366833	2366836	AFUB_008280	.	+	ena	start_codon	0	gene_id "AFUB_008280"; transcript_id "EDP56122"; exon_number "1"; gene_source "ena"; gene_biotype "protein_coding"; transcript_source "ena"; transcript_biotype "protein_coding";	653	3
DS499594	2368832	2368833	DS499594	2368491	2372275	AFUB_008290	.	+	ena	gene	.	gene_id "AFUB_008290"; gene_source "ena"; gene_biotype "protein_coding";	0	3
DS499594	2372804	2372805	DS499594	2372888	2372891	AFUB_008300	.	+	ena	start_codon	0	gene_id "AFUB_008300"; transcript_id "EDP56124"; exon_number "1"; gene_source "ena"; gene_biotype "protein_coding"; transcript_source "ena"; transcript_biotype "protein_coding";	84	3
DS499594	2388872	2388873	DS499594	2388974	2388977	AFUB_008350	.	+	ena	start_codon	0	gene_id "AFUB_008350"; transcript_id "EDP56129"; exon_number "1"; gene_source "ena"; gene_biotype "protein_coding"; transcript_source "ena"; transcript_biotype "protein_coding";	102	3
DS499594	2400434	2400435	DS499594	2400482	2400485	AFUB_008400	.	+	ena	start_codon	0	gene_id "AFUB_008400"; transcript_id "EDP56134"; exon_number "1"; gene_source "ena"; gene_biotype "protein_coding"; transcript_source "ena"; transcript_biotype "protein_coding";	48	3
DS499594	2404876	2404877	DS499594	2404884	2404887	AFUB_008430	.	+	ena	start_codon	0	gene_id "AFUB_008430"; transcript_id "EDP56137"; exon_number "1"; gene_source "ena"; gene_biotype "protein_coding"; transcript_source "ena"; transcript_biotype "protein_coding";	8	3
DS499594	2407456	2407457	DS499594	2407677	2407680	AFUB_008440	.	+	ena	start_codon	0	gene_id "AFUB_008440"; transcript_id "EDP56138"; exon_number "1"; gene_source "ena"; gene_biotype "protein_coding"; transcript_source "ena"; transcript_biotype "protein_coding";	221	3
DS499594	2412305	2412306	DS499594	2412598	2412601	AFUB_008450	.	+	ena	start_codon	0	gene_id "AFUB_008450"; transcript_id "EDP56139"; exon_number "1"; gene_source "ena"; gene_biotype "protein_coding"; transcript_source "ena"; transcript_biotype "protein_coding";	293	3
DS499594	2418651	2418652	DS499594	2418837	2418840	AFUB_008470	.	+	ena	start_codon	0	gene_id "AFUB_008470"; transcript_id "EDP56141"; exon_number "1"; gene_source "ena"; gene_biotype "protein_coding"; transcript_source "ena"; transcript_biotype "protein_coding";	186	3
DS499594	2455407	2455408	DS499594	2455612	2455615	AFUB_008600	.	+	ena	start_codon	0	gene_id "AFUB_008600"; transcript_id "EDP56154"; exon_number "1"; gene_source "ena"; gene_biotype "protein_coding"; transcript_source "ena"; transcript_biotype "protein_coding";	205	3
DS499594	2459160	2459161	DS499594	2459216	2459219	AFUB_008620	.	+	ena	start_codon	0	gene_id "AFUB_008620"; transcript_id "EDP56156"; exon_number "1"; gene_source "ena"; gene_biotype "protein_coding"; transcript_source "ena"; transcript_biotype "protein_coding";	56	3
DS499594	2469860	2469861	DS499594	2469983	2469986	AFUB_008670	.	+	ena	start_codon	0	gene_id "AFUB_008670"; transcript_id "EDP56161"; exon_number "1"; gene_source "ena"; gene_biotype "protein_coding"; transcript_source "ena"; transcript_biotype "protein_coding";	123	3
DS499594	2478071	2478072	DS499594	2478454	2478457	AFUB_008700	.	+	ena	start_codon	0	gene_id "AFUB_008700"; transcript_id "EDP56164"; exon_number "1"; gene_source "ena"; gene_biotype "protein_coding"; transcript_source "ena"; transcript_biotype "protein_coding";	383	3
DS499594	2481856	2481857	DS499594	2482058	2482061	AFUB_008710	.	+	ena	start_codon	0	gene_id "AFUB_008710"; transcript_id "EDP56165"; exon_number "1"; gene_source "ena"; gene_biotype "protein_coding"; transcript_source "ena"; transcript_biotype "protein_coding";	202	3
DS499594	2491403	2491404	DS499594	2491502	2491505	AFUB_008750	.	+	ena	start_codon	0	gene_id "AFUB_008750"; transcript_id "EDP56169"; exon_number "1"; gene_source "ena"; gene_biotype "protein_coding"; transcript_source "ena"; transcript_biotype "protein_coding";	99	3
DS499594	2505302	2505303	DS499594	2505897	2505900	AFUB_008850	.	+	ena	start_codon	0	gene_id "AFUB_008850"; transcript_id "EDP56176"; exon_number "1"; gene_source "ena"; gene_biotype "protein_coding"; transcript_source "ena"; transcript_biotype "protein_coding";	595	3
DS499594	2512397	2512398	DS499594	2512687	2512690	AFUB_008890	.	+	ena	start_codon	0	gene_id "AFUB_008890"; transcript_id "EDP56180"; exon_number "1"; gene_source "ena"; gene_biotype "protein_coding"; transcript_source "ena"; transcript_biotype "protein_coding";	290	3
DS499594	2520871	2520872	DS499594	2521007	2521010	AFUB_008930	.	+	ena	start_codon	0	gene_id "AFUB_008930"; transcript_id "EDP56184"; exon_number "1"; gene_source "ena"; gene_biotype "protein_coding"; transcript_source "ena"; transcript_biotype "protein_coding";	136	3
DS499594	2522468	2522469	DS499594	2522703	2522706	AFUB_008940	.	+	ena	start_codon	0	gene_id "AFUB_008940"; transcript_id "EDP56185"; exon_number "1"; gene_source "ena"; gene_biotype "protein_coding"; transcript_source "ena"; transcript_biotype "protein_coding";	235	3
DS499594	2530084	2530085	DS499594	2530185	2530188	AFUB_008960	.	+	ena	start_codon	0	gene_id "AFUB_008960"; transcript_id "EDP56187"; exon_number "1"; gene_source "ena"; gene_biotype "protein_coding"; transcript_source "ena"; transcript_biotype "protein_coding";	101	3
DS499594	2530092	2530093	DS499594	2530185	2530188	AFUB_008960	.	+	ena	start_codon	0	gene_id "AFUB_008960"; transcript_id "EDP56187"; exon_number "1"; gene_source "ena"; gene_biotype "protein_coding"; transcript_source "ena"; transcript_biotype "protein_coding";	93	3
DS499594	2541295	2541296	DS499594	2541814	2541817	AFUB_009000	.	+	ena	start_codon	0	gene_id "AFUB_009000"; transcript_id "EDP56191"; exon_number "1"; gene_source "ena"; gene_biotype "protein_coding"; transcript_source "ena"; transcript_biotype "protein_coding";	519	3
DS499594	2550687	2550688	DS499594	2550857	2550860	AFUB_009040	.	+	ena	start_codon	0	gene_id "AFUB_009040"; transcript_id "EDP56195"; exon_number "1"; gene_source "ena"; gene_biotype "protein_coding"; transcript_source "ena"; transcript_biotype "protein_coding";	170	3
DS499594	2552804	2552805	DS499594	2552963	2552966	AFUB_009050	.	+	ena	start_codon	0	gene_id "AFUB_009050"; transcript_id "EDP56196"; exon_number "1"; gene_source "ena"; gene_biotype "protein_coding"; transcript_source "ena"; transcript_biotype "protein_coding";	159	3
DS499594	2573439	2573440	DS499594	2573608	2573611	AFUB_009110	.	+	ena	start_codon	0	gene_id "AFUB_009110"; transcript_id "EDP56202"; exon_number "1"; gene_source "ena"; gene_biotype "protein_coding"; transcript_source "ena"; transcript_biotype "protein_coding";	169	3
DS499594	2583700	2583701	DS499594	2584840	2584843	AFUB_009130	.	+	ena	start_codon	0	gene_id "AFUB_009130"; transcript_id "EDP56204"; exon_number "1"; gene_source "ena"; gene_biotype "protein_coding"; transcript_source "ena"; transcript_biotype "protein_coding";	1140	3
DS499594	2589603	2589604	DS499594	2589779	2589782	AFUB_009150	.	+	ena	start_codon	0	gene_id "AFUB_009150"; transcript_id "EDP56206"; exon_number "1"; gene_source "ena"; gene_biotype "protein_coding"; transcript_source "ena"; transcript_biotype "protein_coding";	176	3
DS499594	2591171	2591172	DS499594	2591255	2591258	AFUB_009170	.	+	ena	start_codon	0	gene_id "AFUB_009170"; transcript_id "EDP56208"; exon_number "1"; gene_source "ena"; gene_biotype "protein_coding"; transcript_source "ena"; transcript_biotype "protein_coding";	84	3
DS499594	2610216	2610217	DS499594	2610295	2610298	AFUB_009230	.	+	ena	start_codon	0	gene_id "AFUB_009230"; transcript_id "EDP56215"; exon_number "1"; gene_source "ena"; gene_biotype "protein_coding"; transcript_source "ena"; transcript_biotype "protein_coding";	79	3
DS499594	2612264	2612265	DS499594	2612803	2612806	AFUB_009240	.	+	ena	start_codon	0	gene_id "AFUB_009240"; transcript_id "EDP56216"; exon_number "1"; gene_source "ena"; gene_biotype "protein_coding"; transcript_source "ena"; transcript_biotype "protein_coding";	539	3
DS499594	2618802	2618803	DS499594	2619063	2619066	AFUB_009260	.	+	ena	start_codon	0	gene_id "AFUB_009260"; transcript_id "EDP56218"; exon_number "1"; gene_source "ena"; gene_biotype "protein_coding"; transcript_source "ena"; transcript_biotype "protein_coding";	261	3
DS499594	2623742	2623743	DS499594	2623838	2623841	AFUB_009280	.	+	ena	start_codon	0	gene_id "AFUB_009280"; transcript_id "EDP56220"; exon_number "1"; gene_source "ena"; gene_biotype "protein_coding"; transcript_source "ena"; transcript_biotype "protein_coding";	96	3
DS499594	2636161	2636162	DS499594	2636260	2636263	AFUB_009330	.	+	ena	start_codon	0	gene_id "AFUB_009330"; transcript_id "EDP56225"; exon_number "1"; gene_source "ena"; gene_biotype "protein_coding"; transcript_source "ena"; transcript_biotype "protein_coding";	99	3
DS499594	2643499	2643500	DS499594	2643576	2643579	AFUB_009370	.	+	ena	start_codon	0	gene_id "AFUB_009370"; transcript_id "EDP56229"; exon_number "1"; gene_source "ena"; gene_biotype "protein_coding"; transcript_source "ena"; transcript_biotype "protein_coding";	77	3
DS499594	2645150	2645151	DS499594	2645225	2645228	AFUB_009380	.	+	ena	start_codon	0	gene_id "AFUB_009380"; transcript_id "EDP56230"; exon_number "1"; gene_source "ena"; gene_biotype "protein_coding"; transcript_source "ena"; transcript_biotype "protein_coding";	75	3
DS499594	2651586	2651587	DS499594	2651633	2651636	AFUB_009410	.	+	ena	start_codon	0	gene_id "AFUB_009410"; transcript_id "EDP56233"; exon_number "1"; gene_source "ena"; gene_biotype "protein_coding"; transcript_source "ena"; transcript_biotype "protein_coding";	47	3
DS499594	2651590	2651591	DS499594	2651633	2651636	AFUB_009410	.	+	ena	start_codon	0	gene_id "AFUB_009410"; transcript_id "EDP56233"; exon_number "1"; gene_source "ena"; gene_biotype "protein_coding"; transcript_source "ena"; transcript_biotype "protein_coding";	43	3
DS499594	2669590	2669591	DS499594	2669775	2669778	AFUB_009470	.	+	ena	start_codon	0	gene_id "AFUB_009470"; transcript_id "EDP56239"; exon_number "1"; gene_source "ena"; gene_biotype "protein_coding"; transcript_source "ena"; transcript_biotype "protein_coding";	185	3
DS499594	2675862	2675863	DS499594	2675934	2675937	AFUB_009490	.	+	ena	start_codon	0	gene_id "AFUB_009490"; transcript_id "EDP56241"; exon_number "1"; gene_source "ena"; gene_biotype "protein_coding"; transcript_source "ena"; transcript_biotype "protein_coding";	72	3
DS499594	2696272	2696273	DS499594	2696449	2696452	AFUB_009610	.	+	ena	start_codon	0	gene_id "AFUB_009610"; transcript_id "EDP56253"; exon_number "1"; gene_source "ena"; gene_biotype "protein_coding"; transcript_source "ena"; transcript_biotype "protein_coding";	177	3
DS499594	2734646	2734647	DS499594	2734767	2734770	AFUB_009740	.	+	ena	start_codon	0	gene_id "AFUB_009740"; transcript_id "EDP56266"; exon_number "1"; gene_source "ena"; gene_biotype "protein_coding"; transcript_source "ena"; transcript_biotype "protein_coding";	121	3
DS499594	2739185	2739186	DS499594	2739274	2739277	AFUB_009760	.	+	ena	start_codon	0	gene_id "AFUB_009760"; transcript_id "EDP56268"; exon_number "1"; gene_source "ena"; gene_biotype "protein_coding"; transcript_source "ena"; transcript_biotype "protein_coding";	89	3
DS499594	2789940	2789941	DS499594	2790007	2790010	AFUB_009850	.	+	ena	start_codon	0	gene_id "AFUB_009850"; transcript_id "EDP56277"; exon_number "1"; gene_source "ena"; gene_biotype "protein_coding"; transcript_source "ena"; transcript_biotype "protein_coding";	67	3
DS499594	2809362	2809363	DS499594	2809194	2810257	AFUB_009940	.	+	ena	gene	.	gene_id "AFUB_009940"; gene_source "ena"; gene_biotype "protein_coding";	0	3
DS499594	2842163	2842164	DS499594	2842475	2842478	AFUB_010030	.	+	ena	start_codon	0	gene_id "AFUB_010030"; transcript_id "EDP56294"; exon_number "1"; gene_source "ena"; gene_biotype "protein_coding"; transcript_source "ena"; transcript_biotype "protein_coding";	312	3
DS499594	2842467	2842468	DS499594	2842475	2842478	AFUB_010030	.	+	ena	start_codon	0	gene_id "AFUB_010030"; transcript_id "EDP56294"; exon_number "1"; gene_source "ena"; gene_biotype "protein_coding"; transcript_source "ena"; transcript_biotype "protein_coding";	8	3
DS499594	2886775	2886776	DS499594	2886812	2886815	AFUB_010200	.	+	ena	start_codon	0	gene_id "AFUB_010200"; transcript_id "EDP56311"; exon_number "1"; gene_source "ena"; gene_biotype "protein_coding"; transcript_source "ena"; transcript_biotype "protein_coding";	37	3
DS499594	2892458	2892459	DS499594	2892503	2892506	AFUB_010220	.	+	ena	start_codon	0	gene_id "AFUB_010220"; transcript_id "EDP56313"; exon_number "1"; gene_source "ena"; gene_biotype "protein_coding"; transcript_source "ena"; transcript_biotype "protein_coding";	45	3
DS499594	2893901	2893902	DS499594	2894027	2894030	AFUB_010230	.	+	ena	start_codon	0	gene_id "AFUB_010230"; transcript_id "EDP56314"; exon_number "1"; gene_source "ena"; gene_biotype "protein_coding"; transcript_source "ena"; transcript_biotype "protein_coding";	126	3
DS499594	2938629	2938630	DS499594	2938868	2938871	AFUB_010390	.	+	ena	start_codon	0	gene_id "AFUB_010390"; transcript_id "EDP56330"; exon_number "1"; gene_source "ena"; gene_biotype "protein_coding"; transcript_source "ena"; transcript_biotype "protein_coding";	239	3
DS499594	2981584	2981585	DS499594	2981920	2981923	AFUB_010510	.	+	ena	start_codon	0	gene_id "AFUB_010510"; transcript_id "EDP56341"; exon_number "1"; gene_source "ena"; gene_biotype "protein_coding"; transcript_source "ena"; transcript_biotype "protein_coding";	336	3
DS499594	3000500	3000501	DS499594	3000588	3000591	AFUB_010560	.	+	ena	start_codon	0	gene_id "AFUB_010560"; transcript_id "EDP56346"; exon_number "1"; gene_source "ena"; gene_biotype "protein_coding"; transcript_source "ena"; transcript_biotype "protein_coding";	88	3
DS499594	3014835	3014836	DS499594	3014872	3014875	AFUB_010620	.	+	ena	start_codon	0	gene_id "AFUB_010620"; transcript_id "EDP56352"; exon_number "1"; gene_source "ena"; gene_biotype "protein_coding"; transcript_source "ena"; transcript_biotype "protein_coding";	37	3
DS499594	3017351	3017352	DS499594	3017273	3017538	AFUB_010630	.	+	ena	CDS	0	gene_id "AFUB_010630"; transcript_id "EDP56353"; exon_number "1"; gene_source "ena"; gene_biotype "protein_coding"; transcript_source "ena"; transcript_biotype "protein_coding"; protein_id "EDP56353";	0	3
DS499594	3023813	3023814	DS499594	3023924	3023927	AFUB_010650	.	+	ena	start_codon	0	gene_id "AFUB_010650"; transcript_id "EDP56355"; exon_number "1"; gene_source "ena"; gene_biotype "protein_coding"; transcript_source "ena"; transcript_biotype "protein_coding";	111	3
DS499594	3037571	3037572	DS499594	3037465	3038845	AFUB_010680	.	+	ena	CDS	0	gene_id "AFUB_010680"; transcript_id "EDP56358"; exon_number "1"; gene_source "ena"; gene_biotype "protein_coding"; transcript_source "ena"; transcript_biotype "protein_coding"; protein_id "EDP56358";	0	3
DS499594	3096739	3096740	DS499594	3096835	3096838	AFUB_010900	.	+	ena	start_codon	0	gene_id "AFUB_010900"; transcript_id "EDP56380"; exon_number "1"; gene_source "ena"; gene_biotype "protein_coding"; transcript_source "ena"; transcript_biotype "protein_coding";	96	3
DS499594	3096746	3096747	DS499594	3096835	3096838	AFUB_010900	.	+	ena	start_codon	0	gene_id "AFUB_010900"; transcript_id "EDP56380"; exon_number "1"; gene_source "ena"; gene_biotype "protein_coding"; transcript_source "ena"; transcript_biotype "protein_coding";	89	3
DS499594	3100623	3100624	DS499594	3100747	3100750	AFUB_010920	.	+	ena	start_codon	0	gene_id "AFUB_010920"; transcript_id "EDP56382"; exon_number "1"; gene_source "ena"; gene_biotype "protein_coding"; transcript_source "ena"; transcript_biotype "protein_coding";	124	3
DS499594	3114310	3114311	DS499594	3114408	3114411	AFUB_010980	.	+	ena	start_codon	0	gene_id "AFUB_010980"; transcript_id "EDP56388"; exon_number "1"; gene_source "ena"; gene_biotype "protein_coding"; transcript_source "ena"; transcript_biotype "protein_coding";	98	3
DS499594	3116603	3116604	DS499594	3116979	3116982	AFUB_010990	.	+	ena	start_codon	0	gene_id "AFUB_010990"; transcript_id "EDP56389"; exon_number "1"; gene_source "ena"; gene_biotype "protein_coding"; transcript_source "ena"; transcript_biotype "protein_coding";	376	3
DS499594	3154729	3154730	DS499594	3155128	3155131	AFUB_011170	.	+	ena	start_codon	0	gene_id "AFUB_011170"; transcript_id "EDP56407"; exon_number "1"; gene_source "ena"; gene_biotype "protein_coding"; transcript_source "ena"; transcript_biotype "protein_coding";	399	3
DS499594	3170824	3170825	DS499594	3171285	3171288	AFUB_011240	.	+	ena	start_codon	0	gene_id "AFUB_011240"; transcript_id "EDP56414"; exon_number "1"; gene_source "ena"; gene_biotype "protein_coding"; transcript_source "ena"; transcript_biotype "protein_coding";	461	3
DS499594	3174524	3174525	DS499594	3175288	3175378	AFUB_011250	.	+	ena	exon	.	gene_id "AFUB_011250"; transcript_id "AFUB_011250-1"; exon_number "1"; gene_source "ena"; gene_biotype "tRNA"; transcript_name "AFUB_011250"; transcript_source "ena"; transcript_biotype "tRNA"; exon_id "AFUB_011250-1";	764	3
DS499594	3208114	3208115	DS499594	3208378	3208381	AFUB_011380	.	+	ena	start_codon	0	gene_id "AFUB_011380"; transcript_id "EDP56427"; exon_number "1"; gene_source "ena"; gene_biotype "protein_coding"; transcript_source "ena"; transcript_biotype "protein_coding";	264	3
DS499594	3208293	3208294	DS499594	3208378	3208381	AFUB_011380	.	+	ena	start_codon	0	gene_id "AFUB_011380"; transcript_id "EDP56427"; exon_number "1"; gene_source "ena"; gene_biotype "protein_coding"; transcript_source "ena"; transcript_biotype "protein_coding";	85	3
DS499594	3226509	3226510	DS499594	3226628	3226631	AFUB_011410	.	+	ena	start_codon	0	gene_id "AFUB_011410"; transcript_id "EDP56430"; exon_number "1"; gene_source "ena"; gene_biotype "protein_coding"; transcript_source "ena"; transcript_biotype "protein_coding";	119	3
DS499594	3232674	3232675	DS499594	3232500	3234259	AFUB_011430	.	+	ena	gene	.	gene_id "AFUB_011430"; gene_source "ena"; gene_biotype "protein_coding";	0	3
DS499594	3239374	3239375	DS499594	3239705	3239708	AFUB_011460	.	+	ena	start_codon	0	gene_id "AFUB_011460"; transcript_id "EDP56435"; exon_number "1"; gene_source "ena"; gene_biotype "protein_coding"; transcript_source "ena"; transcript_biotype "protein_coding";	331	3
DS499594	3265385	3265386	DS499594	3265446	3265449	AFUB_011540	.	+	ena	start_codon	0	gene_id "AFUB_011540"; transcript_id "EDP56443"; exon_number "1"; gene_source "ena"; gene_biotype "protein_coding"; transcript_source "ena"; transcript_biotype "protein_coding";	61	3
DS499594	3269269	3269270	DS499594	3269384	3269387	AFUB_011560	.	+	ena	start_codon	0	gene_id "AFUB_011560"; transcript_id "EDP56445"; exon_number "1"; gene_source "ena"; gene_biotype "protein_coding"; transcript_source "ena"; transcript_biotype "protein_coding";	115	3
DS499594	3281206	3281207	DS499594	3281036	3282050	AFUB_011630	.	+	ena	CDS	0	gene_id "AFUB_011630"; transcript_id "EDP56452"; exon_number "1"; gene_source "ena"; gene_biotype "protein_coding"; transcript_source "ena"; transcript_biotype "protein_coding"; protein_id "EDP56452";	0	3
DS499594	3282508	3282509	DS499594	3282563	3282566	AFUB_011640	.	+	ena	start_codon	0	gene_id "AFUB_011640"; transcript_id "EDP56453"; exon_number "1"; gene_source "ena"; gene_biotype "protein_coding"; transcript_source "ena"; transcript_biotype "protein_coding";	55	3
DS499594	3289774	3289775	DS499594	3290022	3290025	AFUB_011670	.	+	ena	start_codon	0	gene_id "AFUB_011670"; transcript_id "EDP56456"; exon_number "1"; gene_source "ena"; gene_biotype "protein_coding"; transcript_source "ena"; transcript_biotype "protein_coding";	248	3
DS499594	3306084	3306085	DS499594	3306144	3306147	AFUB_011740	.	+	ena	start_codon	0	gene_id "AFUB_011740"; transcript_id "EDP56463"; exon_number "1"; gene_source "ena"; gene_biotype "protein_coding"; transcript_source "ena"; transcript_biotype "protein_coding";	60	3
DS499594	3309020	3309021	DS499594	3309222	3309225	AFUB_011760	.	+	ena	start_codon	0	gene_id "AFUB_011760"; transcript_id "EDP56465"; exon_number "1"; gene_source "ena"; gene_biotype "protein_coding"; transcript_source "ena"; transcript_biotype "protein_coding";	202	3
DS499594	3337395	3337396	DS499594	3337534	3337537	AFUB_011860	.	+	ena	start_codon	0	gene_id "AFUB_011860"; transcript_id "EDP56475"; exon_number "1"; gene_source "ena"; gene_biotype "protein_coding"; transcript_source "ena"; transcript_biotype "protein_coding";	139	3
DS499594	3391780	3391781	DS499594	3391968	3391971	AFUB_012050	.	+	ena	start_codon	0	gene_id "AFUB_012050"; transcript_id "EDP56494"; exon_number "1"; gene_source "ena"; gene_biotype "protein_coding"; transcript_source "ena"; transcript_biotype "protein_coding";	188	3
DS499594	3398877	3398878	DS499594	3399240	3399243	AFUB_012080	.	+	ena	start_codon	0	gene_id "AFUB_012080"; transcript_id "EDP56497"; exon_number "1"; gene_source "ena"; gene_biotype "protein_coding"; transcript_source "ena"; transcript_biotype "protein_coding";	363	3
DS499594	3399127	3399128	DS499594	3399240	3399243	AFUB_012080	.	+	ena	start_codon	0	gene_id "AFUB_012080"; transcript_id "EDP56497"; exon_number "1"; gene_source "ena"; gene_biotype "protein_coding"; transcript_source "ena"; transcript_biotype "protein_coding";	113	3
DS499594	3408455	3408456	DS499594	3408485	3408488	AFUB_012110	.	+	ena	start_codon	0	gene_id "AFUB_012110"; transcript_id "EDP56500"; exon_number "1"; gene_source "ena"; gene_biotype "protein_coding"; transcript_source "ena"; transcript_biotype "protein_coding";	30	3
DS499594	3439681	3439682	DS499594	3439849	3439852	AFUB_012230	.	+	ena	start_codon	0	gene_id "AFUB_012230"; transcript_id "EDP56512"; exon_number "1"; gene_source "ena"; gene_biotype "protein_coding"; transcript_source "ena"; transcript_biotype "protein_coding";	168	3
DS499594	3450310	3450311	DS499594	3450425	3450428	AFUB_012270	.	+	ena	start_codon	0	gene_id "AFUB_012270"; transcript_id "EDP56516"; exon_number "1"; gene_source "ena"; gene_biotype "protein_coding"; transcript_source "ena"; transcript_biotype "protein_coding";	115	3
DS499594	3461202	3461203	DS499594	3461251	3461254	AFUB_012310	.	+	ena	start_codon	0	gene_id "AFUB_012310"; transcript_id "EDP56520"; exon_number "1"; gene_source "ena"; gene_biotype "protein_coding"; transcript_source "ena"; transcript_biotype "protein_coding";	49	3
DS499594	3466511	3466512	DS499594	3466670	3466673	AFUB_012320	.	+	ena	start_codon	0	gene_id "AFUB_012320"; transcript_id "EDP56521"; exon_number "1"; gene_source "ena"; gene_biotype "protein_coding"; transcript_source "ena"; transcript_biotype "protein_coding";	159	3
DS499594	3474290	3474291	DS499594	3474367	3474370	AFUB_012370	.	+	ena	start_codon	0	gene_id "AFUB_012370"; transcript_id "EDP56526"; exon_number "1"; gene_source "ena"; gene_biotype "protein_coding"; transcript_source "ena"; transcript_biotype "protein_coding";	77	3
DS499594	3477907	3477908	DS499594	3478285	3478288	AFUB_012380	.	+	ena	start_codon	0	gene_id "AFUB_012380"; transcript_id "EDP56527"; exon_number "1"; gene_source "ena"; gene_biotype "protein_coding"; transcript_source "ena"; transcript_biotype "protein_coding";	378	3
DS499594	3482576	3482577	DS499594	3482808	3482811	AFUB_012390	.	+	ena	start_codon	0	gene_id "AFUB_012390"; transcript_id "EDP56528"; exon_number "1"; gene_source "ena"; gene_biotype "protein_coding"; transcript_source "ena"; transcript_biotype "protein_coding";	232	3
DS499594	3535333	3535334	DS499594	3535374	3535377	AFUB_012550	.	+	ena	start_codon	0	gene_id "AFUB_012550"; transcript_id "EDP56544"; exon_number "1"; gene_source "ena"; gene_biotype "protein_coding"; transcript_source "ena"; transcript_biotype "protein_coding";	41	3
DS499594	3552204	3552205	DS499594	3552238	3552241	AFUB_012610	.	+	ena	start_codon	0	gene_id "AFUB_012610"; transcript_id "EDP56550"; exon_number "1"; gene_source "ena"; gene_biotype "protein_coding"; transcript_source "ena"; transcript_biotype "protein_coding";	34	3
DS499594	3558613	3558614	DS499594	3558684	3558687	AFUB_012630	.	+	ena	start_codon	0	gene_id "AFUB_012630"; transcript_id "EDP56552"; exon_number "1"; gene_source "ena"; gene_biotype "protein_coding"; transcript_source "ena"; transcript_biotype "protein_coding";	71	3
DS499594	3570129	3570130	DS499594	3570230	3570233	AFUB_012690	.	+	ena	start_codon	0	gene_id "AFUB_012690"; transcript_id "EDP56558"; exon_number "1"; gene_source "ena"; gene_biotype "protein_coding"; transcript_source "ena"; transcript_biotype "protein_coding";	101	3
DS499594	3575683	3575684	DS499594	3575795	3575798	AFUB_012700	.	+	ena	start_codon	0	gene_id "AFUB_012700"; transcript_id "EDP56559"; exon_number "1"; gene_source "ena"; gene_biotype "protein_coding"; transcript_source "ena"; transcript_biotype "protein_coding";	112	3
DS499594	3600058	3600059	DS499594	3600108	3600111	AFUB_012750	.	+	ena	start_codon	0	gene_id "AFUB_012750"; transcript_id "EDP56564"; exon_number "1"; gene_source "ena"; gene_biotype "protein_coding"; transcript_source "ena"; transcript_biotype "protein_coding";	50	3
DS499594	3607433	3607434	DS499594	3607609	3607612	AFUB_012790	.	+	ena	start_codon	0	gene_id "AFUB_012790"; transcript_id "EDP56568"; exon_number "1"; gene_source "ena"; gene_biotype "protein_coding"; transcript_source "ena"; transcript_biotype "protein_coding";	176	3
DS499594	3614108	3614109	DS499594	3614254	3614257	AFUB_012820	.	+	ena	start_codon	0	gene_id "AFUB_012820"; transcript_id "EDP56571"; exon_number "1"; gene_source "ena"; gene_biotype "protein_coding"; transcript_source "ena"; transcript_biotype "protein_coding";	146	3
DS499594	3626205	3626206	DS499594	3626366	3626369	AFUB_012870	.	+	ena	start_codon	0	gene_id "AFUB_012870"; transcript_id "EDP56576"; exon_number "1"; gene_source "ena"; gene_biotype "protein_coding"; transcript_source "ena"; transcript_biotype "protein_coding";	161	3
DS499594	3632476	3632477	DS499594	3632722	3632725	AFUB_012890	.	+	ena	start_codon	0	gene_id "AFUB_012890"; transcript_id "EDP56578"; exon_number "1"; gene_source "ena"; gene_biotype "protein_coding"; transcript_source "ena"; transcript_biotype "protein_coding";	246	3
DS499594	3638180	3638181	DS499594	3638438	3638441	AFUB_012920	.	+	ena	start_codon	0	gene_id "AFUB_012920"; transcript_id "EDP56581"; exon_number "1"; gene_source "ena"; gene_biotype "protein_coding"; transcript_source "ena"; transcript_biotype "protein_coding";	258	3
DS499594	3649461	3649462	DS499594	3649494	3649497	AFUB_012950	.	+	ena	start_codon	0	gene_id "AFUB_012950"; transcript_id "EDP56584"; exon_number "1"; gene_source "ena"; gene_biotype "protein_coding"; transcript_source "ena"; transcript_biotype "protein_coding";	33	3
DS499594	3652282	3652283	DS499594	3652734	3652737	AFUB_012970	.	+	ena	start_codon	0	gene_id "AFUB_012970"; transcript_id "EDP56586"; exon_number "1"; gene_source "ena"; gene_biotype "protein_coding"; transcript_source "ena"; transcript_biotype "protein_coding";	452	3
DS499594	3654537	3654538	DS499594	3654620	3654623	AFUB_012980	.	+	ena	start_codon	0	gene_id "AFUB_012980"; transcript_id "EDP56587"; exon_number "1"; gene_source "ena"; gene_biotype "protein_coding"; transcript_source "ena"; transcript_biotype "protein_coding";	83	3
DS499594	3672030	3672031	DS499594	3672134	3672137	AFUB_013040	.	+	ena	start_codon	0	gene_id "AFUB_013040"; transcript_id "EDP56593"; exon_number "1"; gene_source "ena"; gene_biotype "protein_coding"; transcript_source "ena"; transcript_biotype "protein_coding";	104	3
DS499594	3684596	3684597	DS499594	3685092	3685095	AFUB_013090	.	+	ena	start_codon	0	gene_id "AFUB_013090"; transcript_id "EDP56598"; exon_number "1"; gene_source "ena"; gene_biotype "protein_coding"; transcript_source "ena"; transcript_biotype "protein_coding";	496	3
DS499594	3687853	3687854	DS499594	3688359	3688362	AFUB_013100	.	+	ena	start_codon	0	gene_id "AFUB_013100"; transcript_id "EDP56599"; exon_number "1"; gene_source "ena"; gene_biotype "protein_coding"; transcript_source "ena"; transcript_biotype "protein_coding";	506	3
DS499594	3736617	3736618	DS499594	3737208	3737211	AFUB_013240	.	+	ena	start_codon	0	gene_id "AFUB_013240"; transcript_id "EDP56613"; exon_number "1"; gene_source "ena"; gene_biotype "protein_coding"; transcript_source "ena"; transcript_biotype "protein_coding";	591	3
DS499594	3749586	3749587	DS499594	3749696	3749699	AFUB_013270	.	+	ena	start_codon	0	gene_id "AFUB_013270"; transcript_id "EDP56616"; exon_number "1"; gene_source "ena"; gene_biotype "protein_coding"; transcript_source "ena"; transcript_biotype "protein_coding";	110	3
DS499594	3749597	3749598	DS499594	3749696	3749699	AFUB_013270	.	+	ena	start_codon	0	gene_id "AFUB_013270"; transcript_id "EDP56616"; exon_number "1"; gene_source "ena"; gene_biotype "protein_coding"; transcript_source "ena"; transcript_biotype "protein_coding";	99	3
DS499594	3800381	3800382	DS499594	3800263	3801835	AFUB_013450	.	+	ena	gene	.	gene_id "AFUB_013450"; gene_source "ena"; gene_biotype "protein_coding";	0	3
DS499594	3842145	3842146	DS499594	3842261	3842264	AFUB_013660	.	+	ena	start_codon	0	gene_id "AFUB_013660"; transcript_id "EDP56649"; exon_number "1"; gene_source "ena"; gene_biotype "protein_coding"; transcript_source "ena"; transcript_biotype "protein_coding";	116	3
DS499594	3849117	3849118	DS499594	3849359	3849362	AFUB_013690	.	+	ena	start_codon	0	gene_id "AFUB_013690"; transcript_id "EDP56652"; exon_number "1"; gene_source "ena"; gene_biotype "protein_coding"; transcript_source "ena"; transcript_biotype "protein_coding";	242	3
DS499594	3890406	3890407	DS499594	3890471	3890474	AFUB_013850	.	+	ena	start_codon	0	gene_id "AFUB_013850"; transcript_id "EDP56667"; exon_number "1"; gene_source "ena"; gene_biotype "protein_coding"; transcript_source "ena"; transcript_biotype "protein_coding";	65	3
DS499594	3896105	3896106	DS499594	3896349	3896352	AFUB_013870	.	+	ena	start_codon	0	gene_id "AFUB_013870"; transcript_id "EDP56669"; exon_number "1"; gene_source "ena"; gene_biotype "protein_coding"; transcript_source "ena"; transcript_biotype "protein_coding";	244	3
DS499594	3920769	3920770	DS499594	3921113	3921116	AFUB_013950	.	+	ena	start_codon	0	gene_id "AFUB_013950"; transcript_id "EDP56677"; exon_number "1"; gene_source "ena"; gene_biotype "protein_coding"; transcript_source "ena"; transcript_biotype "protein_coding";	344	3
DS499594	3925708	3925709	DS499594	3925908	3925911	AFUB_013970	.	+	ena	start_codon	0	gene_id "AFUB_013970"; transcript_id "EDP56679"; exon_number "1"; gene_source "ena"; gene_biotype "protein_coding"; transcript_source "ena"; transcript_biotype "protein_coding";	200	3
DS499594	3927093	3927094	DS499594	3926991	3928303	AFUB_013980	.	+	ena	CDS	0	gene_id "AFUB_013980"; transcript_id "EDP56680"; exon_number "1"; gene_source "ena"; gene_biotype "protein_coding"; transcript_source "ena"; transcript_biotype "protein_coding"; protein_id "EDP56680";	0	3
DS499594	3961544	3961545	DS499594	3961659	3961662	AFUB_014100	.	+	ena	start_codon	0	gene_id "AFUB_014100"; transcript_id "EDP56692"; exon_number "1"; gene_source "ena"; gene_biotype "protein_coding"; transcript_source "ena"; transcript_biotype "protein_coding";	115	3
DS499594	3965748	3965749	DS499594	3965928	3965931	AFUB_014120	.	+	ena	start_codon	0	gene_id "AFUB_014120"; transcript_id "EDP56694"; exon_number "1"; gene_source "ena"; gene_biotype "protein_coding"; transcript_source "ena"; transcript_biotype "protein_coding";	180	3
DS499594	4010405	4010406	DS499594	4010629	4010632	AFUB_014280	.	+	ena	start_codon	0	gene_id "AFUB_014280"; transcript_id "EDP56709"; exon_number "1"; gene_source "ena"; gene_biotype "protein_coding"; transcript_source "ena"; transcript_biotype "protein_coding";	224	3
DS499594	4013016	4013017	DS499594	4013362	4013365	AFUB_014290	.	+	ena	start_codon	0	gene_id "AFUB_014290"; transcript_id "EDP56710"; exon_number "1"; gene_source "ena"; gene_biotype "protein_coding"; transcript_source "ena"; transcript_biotype "protein_coding";	346	3
DS499594	4022193	4022194	DS499594	4022332	4022335	AFUB_014310	.	+	ena	start_codon	0	gene_id "AFUB_014310"; transcript_id "EDP56712"; exon_number "1"; gene_source "ena"; gene_biotype "protein_coding"; transcript_source "ena"; transcript_biotype "protein_coding";	139	3
DS499594	4024859	4024860	DS499594	4025116	4025119	AFUB_014320	.	+	ena	start_codon	0	gene_id "AFUB_014320"; transcript_id "EDP56713"; exon_number "1"; gene_source "ena"; gene_biotype "protein_coding"; transcript_source "ena"; transcript_biotype "protein_coding";	257	3
DS499594	4033643	4033644	DS499594	4033769	4033772	AFUB_014340	.	+	ena	start_codon	0	gene_id "AFUB_014340"; transcript_id "EDP56715"; exon_number "1"; gene_source "ena"; gene_biotype "protein_coding"; transcript_source "ena"; transcript_biotype "protein_coding";	126	3
DS499594	4047101	4047102	DS499594	4047190	4047193	AFUB_014390	.	+	ena	start_codon	0	gene_id "AFUB_014390"; transcript_id "EDP56720"; exon_number "1"; gene_source "ena"; gene_biotype "protein_coding"; transcript_source "ena"; transcript_biotype "protein_coding";	89	3
DS499594	4053750	4053751	DS499594	4053835	4053838	AFUB_014410	.	+	ena	start_codon	0	gene_id "AFUB_014410"; transcript_id "EDP56722"; exon_number "1"; gene_source "ena"; gene_biotype "protein_coding"; transcript_source "ena"; transcript_biotype "protein_coding";	85	3
DS499594	4066913	4066914	DS499594	4067049	4067052	AFUB_014460	.	+	ena	start_codon	0	gene_id "AFUB_014460"; transcript_id "EDP56727"; exon_number "1"; gene_source "ena"; gene_biotype "protein_coding"; transcript_source "ena"; transcript_biotype "protein_coding";	136	3
DS499594	4069856	4069857	DS499594	4070066	4070069	AFUB_014470	.	+	ena	start_codon	0	gene_id "AFUB_014470"; transcript_id "EDP56728"; exon_number "1"; gene_source "ena"; gene_biotype "protein_coding"; transcript_source "ena"; transcript_biotype "protein_coding";	210	3
DS499594	4093149	4093150	DS499594	4093285	4093288	AFUB_014550	.	+	ena	start_codon	0	gene_id "AFUB_014550"; transcript_id "EDP56736"; exon_number "1"; gene_source "ena"; gene_biotype "protein_coding"; transcript_source "ena"; transcript_biotype "protein_coding";	136	3
DS499594	4096556	4096557	DS499594	4096686	4096689	AFUB_014560	.	+	ena	start_codon	0	gene_id "AFUB_014560"; transcript_id "EDP56737"; exon_number "1"; gene_source "ena"; gene_biotype "protein_coding"; transcript_source "ena"; transcript_biotype "protein_coding";	130	3
DS499594	4106502	4106503	DS499594	4106596	4106599	AFUB_014580	.	+	ena	start_codon	0	gene_id "AFUB_014580"; transcript_id "EDP56739"; exon_number "1"; gene_source "ena"; gene_biotype "protein_coding"; transcript_source "ena"; transcript_biotype "protein_coding";	94	3
DS499594	4111031	4111032	DS499594	4111187	4111190	AFUB_014600	.	+	ena	start_codon	0	gene_id "AFUB_014600"; transcript_id "EDP56741"; exon_number "1"; gene_source "ena"; gene_biotype "protein_coding"; transcript_source "ena"; transcript_biotype "protein_coding";	156	3
DS499594	4147512	4147513	DS499594	4147685	4147688	AFUB_014710	.	+	ena	start_codon	0	gene_id "AFUB_014710"; transcript_id "EDP56752"; exon_number "1"; gene_source "ena"; gene_biotype "protein_coding"; transcript_source "ena"; transcript_biotype "protein_coding";	173	3
DS499594	4172726	4172727	DS499594	4173059	4173062	AFUB_014800	.	+	ena	start_codon	0	gene_id "AFUB_014800"; transcript_id "EDP56761"; exon_number "1"; gene_source "ena"; gene_biotype "protein_coding"; transcript_source "ena"; transcript_biotype "protein_coding";	333	3
DS499594	4178381	4178382	DS499594	4178218	4181209	AFUB_014820	.	+	ena	CDS	0	gene_id "AFUB_014820"; transcript_id "EDP56763"; exon_number "1"; gene_source "ena"; gene_biotype "protein_coding"; transcript_source "ena"; transcript_biotype "protein_coding"; protein_id "EDP56763";	0	3
DS499594	4219021	4219022	DS499594	4219095	4219098	AFUB_014930	.	+	ena	start_codon	0	gene_id "AFUB_014930"; transcript_id "EDP56774"; exon_number "1"; gene_source "ena"; gene_biotype "protein_coding"; transcript_source "ena"; transcript_biotype "protein_coding";	74	3
DS499594	4227515	4227516	DS499594	4227543	4227546	AFUB_014980	.	+	ena	start_codon	0	gene_id "AFUB_014980"; transcript_id "EDP56778"; exon_number "1"; gene_source "ena"; gene_biotype "protein_coding"; transcript_source "ena"; transcript_biotype "protein_coding";	28	3
DS499594	4323542	4323543	DS499594	4323945	4323948	AFUB_015260	.	+	ena	start_codon	0	gene_id "AFUB_015260"; transcript_id "EDP56806"; exon_number "1"; gene_source "ena"; gene_biotype "protein_coding"; transcript_source "ena"; transcript_biotype "protein_coding";	403	3
DS499594	4329034	4329035	DS499594	4329145	4329148	AFUB_015290	.	+	ena	start_codon	0	gene_id "AFUB_015290"; transcript_id "EDP56809"; exon_number "1"; gene_source "ena"; gene_biotype "protein_coding"; transcript_source "ena"; transcript_biotype "protein_coding";	111	3
DS499594	4331063	4331064	DS499594	4331182	4331185	AFUB_015300	.	+	ena	start_codon	0	gene_id "AFUB_015300"; transcript_id "EDP56810"; exon_number "1"; gene_source "ena"; gene_biotype "protein_coding"; transcript_source "ena"; transcript_biotype "protein_coding";	119	3
DS499594	4348555	4348556	DS499594	4348595	4348598	AFUB_015360	.	+	ena	start_codon	0	gene_id "AFUB_015360"; transcript_id "EDP56816"; exon_number "1"; gene_source "ena"; gene_biotype "protein_coding"; transcript_source "ena"; transcript_biotype "protein_coding";	40	3
DS499594	4364652	4364653	DS499594	4365097	4365100	AFUB_015410	.	+	ena	start_codon	0	gene_id "AFUB_015410"; transcript_id "EDP56821"; exon_number "1"; gene_source "ena"; gene_biotype "protein_coding"; transcript_source "ena"; transcript_biotype "protein_coding";	445	3
DS499594	4397788	4397789	DS499594	4398159	4398162	AFUB_015480	.	+	ena	start_codon	0	gene_id "AFUB_015480"; transcript_id "EDP56828"; exon_number "1"; gene_source "ena"; gene_biotype "protein_coding"; transcript_source "ena"; transcript_biotype "protein_coding";	371	3
DS499594	4400994	4400995	DS499594	4401303	4401306	AFUB_015490	.	+	ena	start_codon	0	gene_id "AFUB_015490"; transcript_id "EDP56829"; exon_number "1"; gene_source "ena"; gene_biotype "protein_coding"; transcript_source "ena"; transcript_biotype "protein_coding";	309	3
DS499594	4400998	4400999	DS499594	4401303	4401306	AFUB_015490	.	+	ena	start_codon	0	gene_id "AFUB_015490"; transcript_id "EDP56829"; exon_number "1"; gene_source "ena"; gene_biotype "protein_coding"; transcript_source "ena"; transcript_biotype "protein_coding";	305	3
DS499594	4416655	4416656	DS499594	4416809	4416812	AFUB_015530	.	+	ena	start_codon	0	gene_id "AFUB_015530"; transcript_id "EDP56832"; exon_number "1"; gene_source "ena"; gene_biotype "protein_coding"; transcript_source "ena"; transcript_biotype "protein_coding";	154	3
DS499594	4420216	4420217	DS499594	4420210	4421815	AFUB_015550	.	+	ena	CDS	0	gene_id "AFUB_015550"; transcript_id "EDP56834"; exon_number "1"; gene_source "ena"; gene_biotype "protein_coding"; transcript_source "ena"; transcript_biotype "protein_coding"; protein_id "EDP56834";	0	3
DS499594	4439768	4439769	DS499594	4439897	4439900	AFUB_015620	.	+	ena	start_codon	0	gene_id "AFUB_015620"; transcript_id "EDP56841"; exon_number "1"; gene_source "ena"; gene_biotype "protein_coding"; transcript_source "ena"; transcript_biotype "protein_coding";	129	3
DS499594	4439774	4439775	DS499594	4439897	4439900	AFUB_015620	.	+	ena	start_codon	0	gene_id "AFUB_015620"; transcript_id "EDP56841"; exon_number "1"; gene_source "ena"; gene_biotype "protein_coding"; transcript_source "ena"; transcript_biotype "protein_coding";	123	3
DS499594	4447467	4447468	DS499594	4447542	4447545	AFUB_015670	.	+	ena	start_codon	0	gene_id "AFUB_015670"; transcript_id "EDP56846"; exon_number "1"; gene_source "ena"; gene_biotype "protein_coding"; transcript_source "ena"; transcript_biotype "protein_coding";	75	3
DS499594	4473544	4473545	DS499594	4473516	4473780	AFUB_015790	.	+	ena	CDS	0	gene_id "AFUB_015790"; transcript_id "EDP56858"; exon_number "1"; gene_source "ena"; gene_biotype "protein_coding"; transcript_source "ena"; transcript_biotype "protein_coding"; protein_id "EDP56858";	0	3
DS499594	4479638	4479639	DS499594	4480118	4480121	AFUB_015810	.	+	ena	start_codon	0	gene_id "AFUB_015810"; transcript_id "EDP56860"; exon_number "1"; gene_source "ena"; gene_biotype "protein_coding"; transcript_source "ena"; transcript_biotype "protein_coding";	480	3
DS499594	4537800	4537801	DS499594	4538057	4538060	AFUB_016040	.	+	ena	start_codon	0	gene_id "AFUB_016040"; transcript_id "EDP56882"; exon_number "1"; gene_source "ena"; gene_biotype "protein_coding"; transcript_source "ena"; transcript_biotype "protein_coding";	257	3
DS499594	4547997	4547998	DS499594	4548743	4548746	AFUB_016060	.	+	ena	start_codon	0	gene_id "AFUB_016060"; transcript_id "EDP56884"; exon_number "1"; gene_source "ena"; gene_biotype "protein_coding"; transcript_source "ena"; transcript_biotype "protein_coding";	746	3
DS499594	4555304	4555305	DS499594	4555622	4555625	AFUB_016070	.	+	ena	start_codon	0	gene_id "AFUB_016070"; transcript_id "EDP56885"; exon_number "1"; gene_source "ena"; gene_biotype "protein_coding"; transcript_source "ena"; transcript_biotype "protein_coding";	318	3
DS499594	4582710	4582711	DS499594	4582812	4582815	AFUB_016140	.	+	ena	start_codon	0	gene_id "AFUB_016140"; transcript_id "EDP56892"; exon_number "1"; gene_source "ena"; gene_biotype "protein_coding"; transcript_source "ena"; transcript_biotype "protein_coding";	102	3
DS499594	4594998	4594999	DS499594	4595299	4595302	AFUB_016190	.	+	ena	start_codon	0	gene_id "AFUB_016190"; transcript_id "EDP56897"; exon_number "1"; gene_source "ena"; gene_biotype "protein_coding"; transcript_source "ena"; transcript_biotype "protein_coding";	301	3
DS499594	4601895	4601896	DS499594	4602024	4602027	AFUB_016210	.	+	ena	start_codon	0	gene_id "AFUB_016210"; transcript_id "EDP56899"; exon_number "1"; gene_source "ena"; gene_biotype "protein_coding"; transcript_source "ena"; transcript_biotype "protein_coding";	129	3
DS499594	4608838	4608839	DS499594	4609325	4609328	AFUB_016240	.	+	ena	start_codon	0	gene_id "AFUB_016240"; transcript_id "EDP56902"; exon_number "1"; gene_source "ena"; gene_biotype "protein_coding"; transcript_source "ena"; transcript_biotype "protein_coding";	487	3
DS499594	4643459	4643460	DS499594	4643677	4643680	AFUB_016340	.	+	ena	start_codon	0	gene_id "AFUB_016340"; transcript_id "EDP56912"; exon_number "1"; gene_source "ena"; gene_biotype "protein_coding"; transcript_source "ena"; transcript_biotype "protein_coding";	218	3
DS499594	4651956	4651957	DS499594	4652087	4652090	AFUB_016390	.	+	ena	start_codon	0	gene_id "AFUB_016390"; transcript_id "EDP56917"; exon_number "1"; gene_source "ena"; gene_biotype "protein_coding"; transcript_source "ena"; transcript_biotype "protein_coding";	131	3
DS499594	4673199	4673200	DS499594	4673618	4673621	AFUB_016460	.	+	ena	start_codon	0	gene_id "AFUB_016460"; transcript_id "EDP56924"; exon_number "1"; gene_source "ena"; gene_biotype "protein_coding"; transcript_source "ena"; transcript_biotype "protein_coding";	419	3
DS499594	4693119	4693120	DS499594	4693157	4693160	AFUB_016560	.	+	ena	start_codon	0	gene_id "AFUB_016560"; transcript_id "EDP56934"; exon_number "1"; gene_source "ena"; gene_biotype "protein_coding"; transcript_source "ena"; transcript_biotype "protein_coding";	38	3
DS499594	4735465	4735466	DS499594	4735522	4735525	AFUB_016670	.	+	ena	start_codon	0	gene_id "AFUB_016670"; transcript_id "EDP56945"; exon_number "1"; gene_source "ena"; gene_biotype "protein_coding"; transcript_source "ena"; transcript_biotype "protein_coding";	57	3
DS499594	4769781	4769782	DS499594	4769900	4769903	AFUB_016770	.	+	ena	start_codon	0	gene_id "AFUB_016770"; transcript_id "EDP56955"; exon_number "1"; gene_source "ena"; gene_biotype "protein_coding"; transcript_source "ena"; transcript_biotype "protein_coding";	119	3
DS499594	4794197	4794198	DS499594	4794519	4794522	AFUB_016830	.	+	ena	start_codon	0	gene_id "AFUB_016830"; transcript_id "EDP56961"; exon_number "1"; gene_source "ena"; gene_biotype "protein_coding"; transcript_source "ena"; transcript_biotype "protein_coding";	322	3
DS499594	4794389	4794390	DS499594	4794519	4794522	AFUB_016830	.	+	ena	start_codon	0	gene_id "AFUB_016830"; transcript_id "EDP56961"; exon_number "1"; gene_source "ena"; gene_biotype "protein_coding"; transcript_source "ena"; transcript_biotype "protein_coding";	130	3
DS499595	26533	26534	DS499595	26597	26600	AFUB_017260	.	+	ena	start_codon	0	gene_id "AFUB_017260"; transcript_id "EDP53685"; exon_number "1"; gene_source "ena"; gene_biotype "protein_coding"; transcript_source "ena"; transcript_biotype "protein_coding";	64	3
DS499595	50475	50476	DS499595	50720	50723	AFUB_017370	.	+	ena	start_codon	0	gene_id "AFUB_017370"; transcript_id "EDP53696"; exon_number "1"; gene_source "ena"; gene_biotype "protein_coding"; transcript_source "ena"; transcript_biotype "protein_coding";	245	3
DS499595	52819	52820	DS499595	52860	52863	AFUB_017380	.	+	ena	start_codon	0	gene_id "AFUB_017380"; transcript_id "EDP53697"; exon_number "1"; gene_source "ena"; gene_biotype "protein_coding"; transcript_source "ena"; transcript_biotype "protein_coding";	41	3
DS499595	115303	115304	DS499595	115380	115383	AFUB_017630	.	+	ena	start_codon	0	gene_id "AFUB_017630"; transcript_id "EDP53721"; exon_number "1"; gene_source "ena"; gene_biotype "protein_coding"; transcript_source "ena"; transcript_biotype "protein_coding";	77	3
DS499595	118732	118733	DS499595	118765	118768	AFUB_017650	.	+	ena	start_codon	0	gene_id "AFUB_017650"; transcript_id "EDP53723"; exon_number "1"; gene_source "ena"; gene_biotype "protein_coding"; transcript_source "ena"; transcript_biotype "protein_coding";	33	3
DS499595	140943	140944	DS499595	141726	141729	AFUB_017750	.	+	ena	start_codon	0	gene_id "AFUB_017750"; transcript_id "EDP53732"; exon_number "1"; gene_source "ena"; gene_biotype "protein_coding"; transcript_source "ena"; transcript_biotype "protein_coding";	783	3
DS499595	153377	153378	DS499595	153433	153436	AFUB_017800	.	+	ena	start_codon	0	gene_id "AFUB_017800"; transcript_id "EDP53737"; exon_number "1"; gene_source "ena"; gene_biotype "protein_coding"; transcript_source "ena"; transcript_biotype "protein_coding";	56	3
DS499595	186158	186159	DS499595	186280	186283	AFUB_017930	.	+	ena	start_codon	0	gene_id "AFUB_017930"; transcript_id "EDP53750"; exon_number "1"; gene_source "ena"; gene_biotype "protein_coding"; transcript_source "ena"; transcript_biotype "protein_coding";	122	3
DS499595	214250	214251	DS499595	214312	214315	AFUB_018050	.	+	ena	start_codon	0	gene_id "AFUB_018050"; transcript_id "EDP53761"; exon_number "1"; gene_source "ena"; gene_biotype "protein_coding"; transcript_source "ena"; transcript_biotype "protein_coding";	62	3
DS499595	226724	226725	DS499595	227086	227089	AFUB_018100	.	+	ena	start_codon	0	gene_id "AFUB_018100"; transcript_id "EDP53766"; exon_number "1"; gene_source "ena"; gene_biotype "protein_coding"; transcript_source "ena"; transcript_biotype "protein_coding";	362	3
DS499595	239875	239876	DS499595	239954	239957	AFUB_018150	.	+	ena	start_codon	0	gene_id "AFUB_018150"; transcript_id "EDP53771"; exon_number "1"; gene_source "ena"; gene_biotype "protein_coding"; transcript_source "ena"; transcript_biotype "protein_coding";	79	3
DS499595	264598	264599	DS499595	264842	264845	AFUB_018250	.	+	ena	start_codon	0	gene_id "AFUB_018250"; transcript_id "EDP53781"; exon_number "1"; gene_source "ena"; gene_biotype "protein_coding"; transcript_source "ena"; transcript_biotype "protein_coding";	244	3
DS499595	276478	276479	DS499595	276761	276764	AFUB_018290	.	+	ena	start_codon	0	gene_id "AFUB_018290"; transcript_id "EDP53785"; exon_number "1"; gene_source "ena"; gene_biotype "protein_coding"; transcript_source "ena"; transcript_biotype "protein_coding";	283	3
DS499595	279107	279108	DS499595	279163	279166	AFUB_018300	.	+	ena	start_codon	0	gene_id "AFUB_018300"; transcript_id "EDP53786"; exon_number "1"; gene_source "ena"; gene_biotype "protein_coding"; transcript_source "ena"; transcript_biotype "protein_coding";	56	3
DS499595	283059	283060	DS499595	283093	283096	AFUB_018320	.	+	ena	start_codon	0	gene_id "AFUB_018320"; transcript_id "EDP53788"; exon_number "1"; gene_source "ena"; gene_biotype "protein_coding"; transcript_source "ena"; transcript_biotype "protein_coding";	34	3
DS499595	289096	289097	DS499595	289226	289229	AFUB_018340	.	+	ena	start_codon	0	gene_id "AFUB_018340"; transcript_id "EDP53790"; exon_number "1"; gene_source "ena"; gene_biotype "protein_coding"; transcript_source "ena"; transcript_biotype "protein_coding";	130	3
DS499595	327510	327511	DS499595	327706	327709	AFUB_018480	.	+	ena	start_codon	0	gene_id "AFUB_018480"; transcript_id "EDP53804"; exon_number "1"; gene_source "ena"; gene_biotype "protein_coding"; transcript_source "ena"; transcript_biotype "protein_coding";	196	3
DS499595	334010	334011	DS499595	333898	334070	AFUB_018510	.	+	ena	CDS	0	gene_id "AFUB_018510"; transcript_id "EDP53807"; exon_number "1"; gene_source "ena"; gene_biotype "protein_coding"; transcript_source "ena"; transcript_biotype "protein_coding"; protein_id "EDP53807";	0	3
DS499595	341677	341678	DS499595	341717	341720	AFUB_018560	.	+	ena	start_codon	0	gene_id "AFUB_018560"; transcript_id "EDP53812"; exon_number "1"; gene_source "ena"; gene_biotype "protein_coding"; transcript_source "ena"; transcript_biotype "protein_coding";	40	3
DS499595	358320	358321	DS499595	358656	358659	AFUB_018610	.	+	ena	start_codon	0	gene_id "AFUB_018610"; transcript_id "EDP53817"; exon_number "1"; gene_source "ena"; gene_biotype "protein_coding"; transcript_source "ena"; transcript_biotype "protein_coding";	336	3
DS499595	388565	388566	DS499595	388687	388690	AFUB_018710	.	+	ena	start_codon	0	gene_id "AFUB_018710"; transcript_id "EDP53827"; exon_number "1"; gene_source "ena"; gene_biotype "protein_coding"; transcript_source "ena"; transcript_biotype "protein_coding";	122	3
DS499595	391593	391594	DS499595	391801	391804	AFUB_018730	.	+	ena	start_codon	0	gene_id "AFUB_018730"; transcript_id "EDP53829"; exon_number "1"; gene_source "ena"; gene_biotype "protein_coding"; transcript_source "ena"; transcript_biotype "protein_coding";	208	3
DS499595	411899	411900	DS499595	411922	411925	AFUB_018780	.	+	ena	start_codon	0	gene_id "AFUB_018780"; transcript_id "EDP53834"; exon_number "1"; gene_source "ena"; gene_biotype "protein_coding"; transcript_source "ena"; transcript_biotype "protein_coding";	23	3
DS499595	414508	414509	DS499595	414793	414796	AFUB_018790	.	+	ena	start_codon	0	gene_id "AFUB_018790"; transcript_id "EDP53835"; exon_number "1"; gene_source "ena"; gene_biotype "protein_coding"; transcript_source "ena"; transcript_biotype "protein_coding";	285	3
DS499595	438170	438171	DS499595	438434	438437	AFUB_018860	.	+	ena	start_codon	0	gene_id "AFUB_018860"; transcript_id "EDP53842"; exon_number "1"; gene_source "ena"; gene_biotype "protein_coding"; transcript_source "ena"; transcript_biotype "protein_coding";	264	3
DS499595	450692	450693	DS499595	450742	450745	AFUB_018900	.	+	ena	start_codon	0	gene_id "AFUB_018900"; transcript_id "EDP53846"; exon_number "1"; gene_source "ena"; gene_biotype "protein_coding"; transcript_source "ena"; transcript_biotype "protein_coding";	50	3
DS499595	454684	454685	DS499595	454742	454745	AFUB_018920	.	+	ena	start_codon	0	gene_id "AFUB_018920"; transcript_id "EDP53848"; exon_number "1"; gene_source "ena"; gene_biotype "protein_coding"; transcript_source "ena"; transcript_biotype "protein_coding";	58	3
DS499595	456543	456544	DS499595	456590	456593	AFUB_018940	.	+	ena	start_codon	0	gene_id "AFUB_018940"; transcript_id "EDP53849"; exon_number "1"; gene_source "ena"; gene_biotype "protein_coding"; transcript_source "ena"; transcript_biotype "protein_coding";	47	3
DS499595	462661	462662	DS499595	461948	463373	AFUB_018970	.	+	ena	gene	.	gene_id "AFUB_018970"; gene_source "ena"; gene_biotype "protein_coding";	0	3
DS499595	471876	471877	DS499595	471923	471926	AFUB_019010	.	+	ena	start_codon	0	gene_id "AFUB_019010"; transcript_id "EDP53855"; exon_number "1"; gene_source "ena"; gene_biotype "protein_coding"; transcript_source "ena"; transcript_biotype "protein_coding";	47	3
DS499595	476083	476084	DS499595	476560	476563	AFUB_019020	.	+	ena	start_codon	0	gene_id "AFUB_019020"; transcript_id "EDP53856"; exon_number "1"; gene_source "ena"; gene_biotype "protein_coding"; transcript_source "ena"; transcript_biotype "protein_coding";	477	3
DS499595	476533	476534	DS499595	476560	476563	AFUB_019020	.	+	ena	start_codon	0	gene_id "AFUB_019020"; transcript_id "EDP53856"; exon_number "1"; gene_source "ena"; gene_biotype "protein_coding"; transcript_source "ena"; transcript_biotype "protein_coding";	27	3
DS499595	492192	492193	DS499595	492312	492315	AFUB_019090	.	+	ena	start_codon	0	gene_id "AFUB_019090"; transcript_id "EDP53863"; exon_number "1"; gene_source "ena"; gene_biotype "protein_coding"; transcript_source "ena"; transcript_biotype "protein_coding";	120	3
DS499595	503896	503897	DS499595	504072	504075	AFUB_019150	.	+	ena	start_codon	0	gene_id "AFUB_019150"; transcript_id "EDP53869"; exon_number "1"; gene_source "ena"; gene_biotype "protein_coding"; transcript_source "ena"; transcript_biotype "protein_coding";	176	3
DS499595	508339	508340	DS499595	508498	508501	AFUB_019160	.	+	ena	start_codon	0	gene_id "AFUB_019160"; transcript_id "EDP53870"; exon_number "1"; gene_source "ena"; gene_biotype "protein_coding"; transcript_source "ena"; transcript_biotype "protein_coding";	159	3
DS499595	524100	524101	DS499595	524186	524189	AFUB_019210	.	+	ena	start_codon	0	gene_id "AFUB_019210"; transcript_id "EDP53875"; exon_number "1"; gene_source "ena"; gene_biotype "protein_coding"; transcript_source "ena"; transcript_biotype "protein_coding";	86	3
DS499595	528762	528763	DS499595	528938	528941	AFUB_019230	.	+	ena	start_codon	0	gene_id "AFUB_019230"; transcript_id "EDP53877"; exon_number "1"; gene_source "ena"; gene_biotype "protein_coding"; transcript_source "ena"; transcript_biotype "protein_coding";	176	3
DS499595	549677	549678	DS499595	549881	549884	AFUB_019290	.	+	ena	start_codon	0	gene_id "AFUB_019290"; transcript_id "EDP53883"; exon_number "1"; gene_source "ena"; gene_biotype "protein_coding"; transcript_source "ena"; transcript_biotype "protein_coding";	204	3
DS499595	558196	558197	DS499595	558339	558342	AFUB_019320	.	+	ena	start_codon	0	gene_id "AFUB_019320"; transcript_id "EDP53886"; exon_number "1"; gene_source "ena"; gene_biotype "protein_coding"; transcript_source "ena"; transcript_biotype "protein_coding";	143	3
DS499595	568545	568546	DS499595	568592	568595	AFUB_019370	.	+	ena	start_codon	0	gene_id "AFUB_019370"; transcript_id "EDP53891"; exon_number "1"; gene_source "ena"; gene_biotype "protein_coding"; transcript_source "ena"; transcript_biotype "protein_coding";	47	3
DS499595	574463	574464	DS499595	574624	574627	AFUB_019400	.	+	ena	start_codon	0	gene_id "AFUB_019400"; transcript_id "EDP53894"; exon_number "1"; gene_source "ena"; gene_biotype "protein_coding"; transcript_source "ena"; transcript_biotype "protein_coding";	161	3
DS499595	578683	578684	DS499595	578768	578771	AFUB_019430	.	+	ena	start_codon	0	gene_id "AFUB_019430"; transcript_id "EDP53897"; exon_number "1"; gene_source "ena"; gene_biotype "protein_coding"; transcript_source "ena"; transcript_biotype "protein_coding";	85	3
DS499595	603875	603876	DS499595	604006	604009	AFUB_019520	.	+	ena	start_codon	0	gene_id "AFUB_019520"; transcript_id "EDP53906"; exon_number "1"; gene_source "ena"; gene_biotype "protein_coding"; transcript_source "ena"; transcript_biotype "protein_coding";	131	3
DS499595	607088	607089	DS499595	607481	607484	AFUB_019530	.	+	ena	start_codon	0	gene_id "AFUB_019530"; transcript_id "EDP53907"; exon_number "1"; gene_source "ena"; gene_biotype "protein_coding"; transcript_source "ena"; transcript_biotype "protein_coding";	393	3
DS499595	608708	608709	DS499595	608941	608944	AFUB_019540	.	+	ena	start_codon	0	gene_id "AFUB_019540"; transcript_id "EDP53908"; exon_number "1"; gene_source "ena"; gene_biotype "protein_coding"; transcript_source "ena"; transcript_biotype "protein_coding";	233	3
DS499595	644641	644642	DS499595	645323	645326	AFUB_019630	.	+	ena	start_codon	0	gene_id "AFUB_019630"; transcript_id "EDP53917"; exon_number "1"; gene_source "ena"; gene_biotype "protein_coding"; transcript_source "ena"; transcript_biotype "protein_coding";	682	3
DS499595	644647	644648	DS499595	645323	645326	AFUB_019630	.	+	ena	start_codon	0	gene_id "AFUB_019630"; transcript_id "EDP53917"; exon_number "1"; gene_source "ena"; gene_biotype "protein_coding"; transcript_source "ena"; transcript_biotype "protein_coding";	676	3
DS499595	651258	651259	DS499595	651572	651575	AFUB_019660	.	+	ena	start_codon	0	gene_id "AFUB_019660"; transcript_id "EDP53920"; exon_number "1"; gene_source "ena"; gene_biotype "protein_coding"; transcript_source "ena"; transcript_biotype "protein_coding";	314	3
DS499595	657114	657115	DS499595	657221	657224	AFUB_019680	.	+	ena	start_codon	0	gene_id "AFUB_019680"; transcript_id "EDP53922"; exon_number "1"; gene_source "ena"; gene_biotype "protein_coding"; transcript_source "ena"; transcript_biotype "protein_coding";	107	3
DS499595	658848	658849	DS499595	658907	658910	AFUB_019690	.	+	ena	start_codon	0	gene_id "AFUB_019690"; transcript_id "EDP53923"; exon_number "1"; gene_source "ena"; gene_biotype "protein_coding"; transcript_source "ena"; transcript_biotype "protein_coding";	59	3
DS499595	662805	662806	DS499595	662927	662930	AFUB_019710	.	+	ena	start_codon	0	gene_id "AFUB_019710"; transcript_id "EDP53925"; exon_number "1"; gene_source "ena"; gene_biotype "protein_coding"; transcript_source "ena"; transcript_biotype "protein_coding";	122	3
DS499595	677191	677192	DS499595	677268	677271	AFUB_019770	.	+	ena	start_codon	0	gene_id "AFUB_019770"; transcript_id "EDP53931"; exon_number "1"; gene_source "ena"; gene_biotype "protein_coding"; transcript_source "ena"; transcript_biotype "protein_coding";	77	3
DS499595	687835	687836	DS499595	687875	687878	AFUB_019810	.	+	ena	start_codon	0	gene_id "AFUB_019810"; transcript_id "EDP53935"; exon_number "1"; gene_source "ena"; gene_biotype "protein_coding"; transcript_source "ena"; transcript_biotype "protein_coding";	40	3
DS499595	720914	720915	DS499595	721384	721387	AFUB_019920	.	+	ena	start_codon	0	gene_id "AFUB_019920"; transcript_id "EDP53946"; exon_number "1"; gene_source "ena"; gene_biotype "protein_coding"; transcript_source "ena"; transcript_biotype "protein_coding";	470	3
DS499595	736263	736264	DS499595	736476	736479	AFUB_019960	.	+	ena	start_codon	0	gene_id "AFUB_019960"; transcript_id "EDP53950"; exon_number "1"; gene_source "ena"; gene_biotype "protein_coding"; transcript_source "ena"; transcript_biotype "protein_coding";	213	3
DS499595	739943	739944	DS499595	740327	740330	AFUB_019970	.	+	ena	start_codon	0	gene_id "AFUB_019970"; transcript_id "EDP53951"; exon_number "1"; gene_source "ena"; gene_biotype "protein_coding"; transcript_source "ena"; transcript_biotype "protein_coding";	384	3
DS499595	747839	747840	DS499595	748035	748038	AFUB_020020	.	+	ena	start_codon	0	gene_id "AFUB_020020"; transcript_id "EDP53956"; exon_number "1"; gene_source "ena"; gene_biotype "protein_coding"; transcript_source "ena"; transcript_biotype "protein_coding";	196	3
DS499595	758730	758731	DS499595	759118	759121	AFUB_020050	.	+	ena	start_codon	0	gene_id "AFUB_020050"; transcript_id "EDP53959"; exon_number "1"; gene_source "ena"; gene_biotype "protein_coding"; transcript_source "ena"; transcript_biotype "protein_coding";	388	3
DS499595	779862	779863	DS499595	779674	780705	AFUB_020100	.	+	ena	gene	.	gene_id "AFUB_020100"; gene_source "ena"; gene_biotype "protein_coding";	0	3
DS499595	799217	799218	DS499595	800080	800083	AFUB_020150	.	+	ena	start_codon	0	gene_id "AFUB_020150"; transcript_id "EDP53969"; exon_number "1"; gene_source "ena"; gene_biotype "protein_coding"; transcript_source "ena"; transcript_biotype "protein_coding";	863	3
DS499595	831708	831709	DS499595	831824	831827	AFUB_020260	.	+	ena	start_codon	0	gene_id "AFUB_020260"; transcript_id "EDP53980"; exon_number "1"; gene_source "ena"; gene_biotype "protein_coding"; transcript_source "ena"; transcript_biotype "protein_coding";	116	3
DS499595	836722	836723	DS499595	836786	836789	AFUB_020290	.	+	ena	start_codon	0	gene_id "AFUB_020290"; transcript_id "EDP53983"; exon_number "1"; gene_source "ena"; gene_biotype "protein_coding"; transcript_source "ena"; transcript_biotype "protein_coding";	64	3
DS499595	845918	845919	DS499595	845982	845985	AFUB_020330	.	+	ena	start_codon	0	gene_id "AFUB_020330"; transcript_id "EDP53987"; exon_number "1"; gene_source "ena"; gene_biotype "protein_coding"; transcript_source "ena"; transcript_biotype "protein_coding";	64	3
DS499595	862828	862829	DS499595	862918	862921	AFUB_020370	.	+	ena	start_codon	0	gene_id "AFUB_020370"; transcript_id "EDP53991"; exon_number "1"; gene_source "ena"; gene_biotype "protein_coding"; transcript_source "ena"; transcript_biotype "protein_coding";	90	3
DS499595	869095	869096	DS499595	869127	869130	AFUB_020400	.	+	ena	start_codon	0	gene_id "AFUB_020400"; transcript_id "EDP53994"; exon_number "1"; gene_source "ena"; gene_biotype "protein_coding"; transcript_source "ena"; transcript_biotype "protein_coding";	32	3
DS499595	870397	870398	DS499595	870477	870480	AFUB_020410	.	+	ena	start_codon	0	gene_id "AFUB_020410"; transcript_id "EDP53995"; exon_number "1"; gene_source "ena"; gene_biotype "protein_coding"; transcript_source "ena"; transcript_biotype "protein_coding";	80	3
DS499595	881723	881724	DS499595	881886	881889	AFUB_020440	.	+	ena	start_codon	0	gene_id "AFUB_020440"; transcript_id "EDP53998"; exon_number "1"; gene_source "ena"; gene_biotype "protein_coding"; transcript_source "ena"; transcript_biotype "protein_coding";	163	3
DS499595	888637	888638	DS499595	888893	888896	AFUB_020470	.	+	ena	start_codon	0	gene_id "AFUB_020470"; transcript_id "EDP54001"; exon_number "1"; gene_source "ena"; gene_biotype "protein_coding"; transcript_source "ena"; transcript_biotype "protein_coding";	256	3
DS499595	944463	944464	DS499595	944546	944549	AFUB_020660	.	+	ena	start_codon	0	gene_id "AFUB_020660"; transcript_id "EDP54016"; exon_number "1"; gene_source "ena"; gene_biotype "protein_coding"; transcript_source "ena"; transcript_biotype "protein_coding";	83	3
DS499595	944471	944472	DS499595	944546	944549	AFUB_020660	.	+	ena	start_codon	0	gene_id "AFUB_020660"; transcript_id "EDP54016"; exon_number "1"; gene_source "ena"; gene_biotype "protein_coding"; transcript_source "ena"; transcript_biotype "protein_coding";	75	3
DS499595	962104	962105	DS499595	962245	962248	AFUB_020730	.	+	ena	start_codon	0	gene_id "AFUB_020730"; transcript_id "EDP54023"; exon_number "1"; gene_source "ena"; gene_biotype "protein_coding"; transcript_source "ena"; transcript_biotype "protein_coding";	141	3
DS499595	985586	985587	DS499595	985644	985647	AFUB_020790	.	+	ena	start_codon	0	gene_id "AFUB_020790"; transcript_id "EDP54029"; exon_number "1"; gene_source "ena"; gene_biotype "protein_coding"; transcript_source "ena"; transcript_biotype "protein_coding";	58	3
DS499595	1003896	1003897	DS499595	1004120	1004123	AFUB_020890	.	+	ena	start_codon	0	gene_id "AFUB_020890"; transcript_id "EDP54039"; exon_number "1"; gene_source "ena"; gene_biotype "protein_coding"; transcript_source "ena"; transcript_biotype "protein_coding";	224	3
DS499595	1007049	1007050	DS499595	1007304	1007307	AFUB_020900	.	+	ena	start_codon	0	gene_id "AFUB_020900"; transcript_id "EDP54040"; exon_number "1"; gene_source "ena"; gene_biotype "protein_coding"; transcript_source "ena"; transcript_biotype "protein_coding";	255	3
DS499595	1021004	1021005	DS499595	1021251	1021254	AFUB_020930	.	+	ena	start_codon	0	gene_id "AFUB_020930"; transcript_id "EDP54043"; exon_number "1"; gene_source "ena"; gene_biotype "protein_coding"; transcript_source "ena"; transcript_biotype "protein_coding";	247	3
DS499595	1022599	1022600	DS499595	1022704	1022707	AFUB_020940	.	+	ena	start_codon	0	gene_id "AFUB_020940"; transcript_id "EDP54044"; exon_number "1"; gene_source "ena"; gene_biotype "protein_coding"; transcript_source "ena"; transcript_biotype "protein_coding";	105	3
DS499595	1067605	1067606	DS499595	1067580	1067843	AFUB_021040	.	+	ena	CDS	0	gene_id "AFUB_021040"; transcript_id "EDP54054"; exon_number "1"; gene_source "ena"; gene_biotype "protein_coding"; transcript_source "ena"; transcript_biotype "protein_coding"; protein_id "EDP54054";	0	3
DS499595	1072988	1072989	DS499595	1073405	1073408	AFUB_021060	.	+	ena	start_codon	0	gene_id "AFUB_021060"; transcript_id "EDP54056"; exon_number "1"; gene_source "ena"; gene_biotype "protein_coding"; transcript_source "ena"; transcript_biotype "protein_coding";	417	3
DS499595	1106512	1106513	DS499595	1106711	1106714	AFUB_021150	.	+	ena	start_codon	0	gene_id "AFUB_021150"; transcript_id "EDP54065"; exon_number "1"; gene_source "ena"; gene_biotype "protein_coding"; transcript_source "ena"; transcript_biotype "protein_coding";	199	3
DS499595	1121741	1121742	DS499595	1121857	1121860	AFUB_021210	.	+	ena	start_codon	0	gene_id "AFUB_021210"; transcript_id "EDP54071"; exon_number "1"; gene_source "ena"; gene_biotype "protein_coding"; transcript_source "ena"; transcript_biotype "protein_coding";	116	3
DS499595	1141439	1141440	DS499595	1142019	1142022	AFUB_021240	.	+	ena	start_codon	0	gene_id "AFUB_021240"; transcript_id "EDP54074"; exon_number "1"; gene_source "ena"; gene_biotype "protein_coding"; transcript_source "ena"; transcript_biotype "protein_coding";	580	3
DS499595	1150440	1150441	DS499595	1150803	1150806	AFUB_021260	.	+	ena	start_codon	0	gene_id "AFUB_021260"; transcript_id "EDP54076"; exon_number "1"; gene_source "ena"; gene_biotype "protein_coding"; transcript_source "ena"; transcript_biotype "protein_coding";	363	3
DS499595	1169814	1169815	DS499595	1170109	1170112	AFUB_021330	.	+	ena	start_codon	0	gene_id "AFUB_021330"; transcript_id "EDP54083"; exon_number "1"; gene_source "ena"; gene_biotype "protein_coding"; transcript_source "ena"; transcript_biotype "protein_coding";	295	3
DS499595	1187483	1187484	DS499595	1188119	1188122	AFUB_021410	.	+	ena	start_codon	0	gene_id "AFUB_021410"; transcript_id "EDP54091"; exon_number "1"; gene_source "ena"; gene_biotype "protein_coding"; transcript_source "ena"; transcript_biotype "protein_coding";	636	3
DS499595	1206666	1206667	DS499595	1206686	1206689	AFUB_021460	.	+	ena	start_codon	0	gene_id "AFUB_021460"; transcript_id "EDP54096"; exon_number "1"; gene_source "ena"; gene_biotype "protein_coding"; transcript_source "ena"; transcript_biotype "protein_coding";	20	3
DS499595	1216451	1216452	DS499595	1216605	1216608	AFUB_021490	.	+	ena	start_codon	0	gene_id "AFUB_021490"; transcript_id "EDP54099"; exon_number "1"; gene_source "ena"; gene_biotype "protein_coding"; transcript_source "ena"; transcript_biotype "protein_coding";	154	3
DS499595	1246375	1246376	DS499595	1246412	1246415	AFUB_021660	.	+	ena	start_codon	0	gene_id "AFUB_021660"; transcript_id "EDP54116"; exon_number "1"; gene_source "ena"; gene_biotype "protein_coding"; transcript_source "ena"; transcript_biotype "protein_coding";	37	3
DS499595	1298367	1298368	DS499595	1298836	1298839	AFUB_021810	.	+	ena	start_codon	0	gene_id "AFUB_021810"; transcript_id "EDP54129"; exon_number "1"; gene_source "ena"; gene_biotype "protein_coding"; transcript_source "ena"; transcript_biotype "protein_coding";	469	3
DS499595	1311395	1311396	DS499595	1311654	1311657	AFUB_021840	.	+	ena	start_codon	0	gene_id "AFUB_021840"; transcript_id "EDP54132"; exon_number "1"; gene_source "ena"; gene_biotype "protein_coding"; transcript_source "ena"; transcript_biotype "protein_coding";	259	3
DS499595	1315074	1315075	DS499595	1315334	1315337	AFUB_021860	.	+	ena	start_codon	0	gene_id "AFUB_021860"; transcript_id "EDP54134"; exon_number "1"; gene_source "ena"; gene_biotype "protein_coding"; transcript_source "ena"; transcript_biotype "protein_coding";	260	3
DS499595	1344959	1344960	DS499595	1345142	1345145	AFUB_021960	.	+	ena	start_codon	0	gene_id "AFUB_021960"; transcript_id "EDP54144"; exon_number "1"; gene_source "ena"; gene_biotype "protein_coding"; transcript_source "ena"; transcript_biotype "protein_coding";	183	3
DS499595	1359997	1359998	DS499595	1360076	1360079	AFUB_022020	.	+	ena	start_codon	0	gene_id "AFUB_022020"; transcript_id "EDP54150"; exon_number "1"; gene_source "ena"; gene_biotype "protein_coding"; transcript_source "ena"; transcript_biotype "protein_coding";	79	3
DS499595	1370941	1370942	DS499595	1371064	1371067	AFUB_022050	.	+	ena	start_codon	0	gene_id "AFUB_022050"; transcript_id "EDP54153"; exon_number "1"; gene_source "ena"; gene_biotype "protein_coding"; transcript_source "ena"; transcript_biotype "protein_coding";	123	3
DS499595	1376221	1376222	DS499595	1375709	1376924	AFUB_022080	.	+	ena	gene	.	gene_id "AFUB_022080"; gene_source "ena"; gene_biotype "protein_coding";	0	3
DS499595	1377989	1377990	DS499595	1378106	1378109	AFUB_022090	.	+	ena	start_codon	0	gene_id "AFUB_022090"; transcript_id "EDP54157"; exon_number "1"; gene_source "ena"; gene_biotype "protein_coding"; transcript_source "ena"; transcript_biotype "protein_coding";	117	3
DS499595	1382590	1382591	DS499595	1382164	1382965	AFUB_022109	.	+	ena	five_prime_utr	.	gene_id "AFUB_022109"; transcript_id "EDP54159"; gene_source "ena"; gene_biotype "protein_coding"; transcript_source "ena"; transcript_biotype "protein_coding";	0	3
DS499595	1434123	1434124	DS499595	1434229	1434232	AFUB_022240	.	+	ena	start_codon	0	gene_id "AFUB_022240"; transcript_id "EDP54172"; exon_number "1"; gene_source "ena"; gene_biotype "protein_coding"; transcript_source "ena"; transcript_biotype "protein_coding";	106	3
DS499595	1442921	1442922	DS499595	1442955	1442958	AFUB_022270	.	+	ena	start_codon	0	gene_id "AFUB_022270"; transcript_id "EDP54175"; exon_number "1"; gene_source "ena"; gene_biotype "protein_coding"; transcript_source "ena"; transcript_biotype "protein_coding";	34	3
DS499595	1473328	1473329	DS499595	1473569	1473572	AFUB_022370	.	+	ena	start_codon	0	gene_id "AFUB_022370"; transcript_id "EDP54185"; exon_number "1"; gene_source "ena"; gene_biotype "protein_coding"; transcript_source "ena"; transcript_biotype "protein_coding";	241	3
DS499595	1496876	1496877	DS499595	1496940	1496943	AFUB_022430	.	+	ena	start_codon	0	gene_id "AFUB_022430"; transcript_id "EDP54191"; exon_number "1"; gene_source "ena"; gene_biotype "protein_coding"; transcript_source "ena"; transcript_biotype "protein_coding";	64	3
DS499595	1509363	1509364	DS499595	1509838	1509841	AFUB_022470	.	+	ena	start_codon	0	gene_id "AFUB_022470"; transcript_id "EDP54195"; exon_number "1"; gene_source "ena"; gene_biotype "protein_coding"; transcript_source "ena"; transcript_biotype "protein_coding";	475	3
DS499595	1520288	1520289	DS499595	1520395	1520398	AFUB_022500	.	+	ena	start_codon	0	gene_id "AFUB_022500"; transcript_id "EDP54198"; exon_number "1"; gene_source "ena"; gene_biotype "protein_coding"; transcript_source "ena"; transcript_biotype "protein_coding";	107	3
DS499595	1523955	1523956	DS499595	1524095	1524098	AFUB_022530	.	+	ena	start_codon	0	gene_id "AFUB_022530"; transcript_id "EDP54201"; exon_number "1"; gene_source "ena"; gene_biotype "protein_coding"; transcript_source "ena"; transcript_biotype "protein_coding";	140	3
DS499595	1525207	1525208	DS499595	1525545	1525548	AFUB_022540	.	+	ena	start_codon	0	gene_id "AFUB_022540"; transcript_id "EDP54202"; exon_number "1"; gene_source "ena"; gene_biotype "protein_coding"; transcript_source "ena"; transcript_biotype "protein_coding";	338	3
DS499595	1535843	1535844	DS499595	1535887	1535890	AFUB_022570	.	+	ena	start_codon	0	gene_id "AFUB_022570"; transcript_id "EDP54205"; exon_number "1"; gene_source "ena"; gene_biotype "protein_coding"; transcript_source "ena"; transcript_biotype "protein_coding";	44	3
DS499595	1539003	1539004	DS499595	1539142	1539145	AFUB_022590	.	+	ena	start_codon	0	gene_id "AFUB_022590"; transcript_id "EDP54207"; exon_number "1"; gene_source "ena"; gene_biotype "protein_coding"; transcript_source "ena"; transcript_biotype "protein_coding";	139	3
DS499595	1540364	1540365	DS499595	1540415	1540418	AFUB_022600	.	+	ena	start_codon	0	gene_id "AFUB_022600"; transcript_id "EDP54208"; exon_number "1"; gene_source "ena"; gene_biotype "protein_coding"; transcript_source "ena"; transcript_biotype "protein_coding";	51	3
DS499595	1541908	1541909	DS499595	1542016	1542019	AFUB_022610	.	+	ena	start_codon	0	gene_id "AFUB_022610"; transcript_id "EDP54209"; exon_number "1"; gene_source "ena"; gene_biotype "protein_coding"; transcript_source "ena"; transcript_biotype "protein_coding";	108	3
DS499595	1556687	1556688	DS499595	1558287	1558290	AFUB_022650	.	+	ena	start_codon	0	gene_id "AFUB_022650"; transcript_id "EDP54213"; exon_number "1"; gene_source "ena"; gene_biotype "protein_coding"; transcript_source "ena"; transcript_biotype "protein_coding";	1600	3
DS499595	1570583	1570584	DS499595	1571150	1571153	AFUB_022700	.	+	ena	start_codon	0	gene_id "AFUB_022700"; transcript_id "EDP54218"; exon_number "1"; gene_source "ena"; gene_biotype "protein_coding"; transcript_source "ena"; transcript_biotype "protein_coding";	567	3
DS499595	1604286	1604287	DS499595	1604612	1604615	AFUB_022770	.	+	ena	start_codon	0	gene_id "AFUB_022770"; transcript_id "EDP54225"; exon_number "1"; gene_source "ena"; gene_biotype "protein_coding"; transcript_source "ena"; transcript_biotype "protein_coding";	326	3
DS499595	1612755	1612756	DS499595	1612954	1612957	AFUB_022810	.	+	ena	start_codon	0	gene_id "AFUB_022810"; transcript_id "EDP54229"; exon_number "1"; gene_source "ena"; gene_biotype "protein_coding"; transcript_source "ena"; transcript_biotype "protein_coding";	199	3
DS499595	1616615	1616616	DS499595	1616728	1616731	AFUB_022830	.	+	ena	start_codon	0	gene_id "AFUB_022830"; transcript_id "EDP54231"; exon_number "1"; gene_source "ena"; gene_biotype "protein_coding"; transcript_source "ena"; transcript_biotype "protein_coding";	113	3
DS499595	1640205	1640206	DS499595	1640095	1640421	AFUB_022910	.	+	ena	gene	.	gene_id "AFUB_022910"; gene_source "ena"; gene_biotype "protein_coding";	0	3
DS499595	1641425	1641426	DS499595	1641816	1641819	AFUB_022920	.	+	ena	start_codon	0	gene_id "AFUB_022920"; transcript_id "EDP54239"; exon_number "1"; gene_source "ena"; gene_biotype "protein_coding"; transcript_source "ena"; transcript_biotype "protein_coding";	391	3
DS499595	1649593	1649594	DS499595	1649694	1649697	AFUB_022950	.	+	ena	start_codon	0	gene_id "AFUB_022950"; transcript_id "EDP54242"; exon_number "1"; gene_source "ena"; gene_biotype "protein_coding"; transcript_source "ena"; transcript_biotype "protein_coding";	101	3
DS499595	1670385	1670386	DS499595	1670580	1670583	AFUB_023030	.	+	ena	start_codon	0	gene_id "AFUB_023030"; transcript_id "EDP54250"; exon_number "1"; gene_source "ena"; gene_biotype "protein_coding"; transcript_source "ena"; transcript_biotype "protein_coding";	195	3
DS499595	1692174	1692175	DS499595	1692262	1692265	AFUB_023110	.	+	ena	start_codon	0	gene_id "AFUB_023110"; transcript_id "EDP54255"; exon_number "1"; gene_source "ena"; gene_biotype "protein_coding"; transcript_source "ena"; transcript_biotype "protein_coding";	88	3
DS499595	1693398	1693399	DS499595	1693590	1693593	AFUB_023120	.	+	ena	start_codon	0	gene_id "AFUB_023120"; transcript_id "EDP54256"; exon_number "1"; gene_source "ena"; gene_biotype "protein_coding"; transcript_source "ena"; transcript_biotype "protein_coding";	192	3
DS499595	1699605	1699606	DS499595	1699777	1699780	AFUB_023140	.	+	ena	start_codon	0	gene_id "AFUB_023140"; transcript_id "EDP54258"; exon_number "1"; gene_source "ena"; gene_biotype "protein_coding"; transcript_source "ena"; transcript_biotype "protein_coding";	172	3
DS499595	1709029	1709030	DS499595	1709415	1709418	AFUB_023170	.	+	ena	start_codon	0	gene_id "AFUB_023170"; transcript_id "EDP54261"; exon_number "1"; gene_source "ena"; gene_biotype "protein_coding"; transcript_source "ena"; transcript_biotype "protein_coding";	386	3
DS499595	1720501	1720502	DS499595	1720760	1720763	AFUB_023190	.	+	ena	start_codon	0	gene_id "AFUB_023190"; transcript_id "EDP54263"; exon_number "1"; gene_source "ena"; gene_biotype "protein_coding"; transcript_source "ena"; transcript_biotype "protein_coding";	259	3
DS499595	1794719	1794720	DS499595	1794901	1794904	AFUB_023370	.	+	ena	start_codon	0	gene_id "AFUB_023370"; transcript_id "EDP54281"; exon_number "1"; gene_source "ena"; gene_biotype "protein_coding"; transcript_source "ena"; transcript_biotype "protein_coding";	182	3
DS499595	1802768	1802769	DS499595	1803215	1803218	AFUB_023410	.	+	ena	start_codon	0	gene_id "AFUB_023410"; transcript_id "EDP54285"; exon_number "1"; gene_source "ena"; gene_biotype "protein_coding"; transcript_source "ena"; transcript_biotype "protein_coding";	447	3
DS499595	1859464	1859465	DS499595	1859592	1859595	AFUB_023460	.	+	ena	start_codon	0	gene_id "AFUB_023460"; transcript_id "EDP54290"; exon_number "1"; gene_source "ena"; gene_biotype "protein_coding"; transcript_source "ena"; transcript_biotype "protein_coding";	128	3
DS499595	1887923	1887924	DS499595	1888019	1888022	AFUB_023490	.	+	ena	start_codon	0	gene_id "AFUB_023490"; transcript_id "EDP54293"; exon_number "1"; gene_source "ena"; gene_biotype "protein_coding"; transcript_source "ena"; transcript_biotype "protein_coding";	96	3
DS499595	1892902	1892903	DS499595	1893051	1893054	AFUB_023510	.	+	ena	start_codon	0	gene_id "AFUB_023510"; transcript_id "EDP54295"; exon_number "1"; gene_source "ena"; gene_biotype "protein_coding"; transcript_source "ena"; transcript_biotype "protein_coding";	149	3
DS499595	1906862	1906863	DS499595	1906908	1906911	AFUB_023550	.	+	ena	start_codon	0	gene_id "AFUB_023550"; transcript_id "EDP54299"; exon_number "1"; gene_source "ena"; gene_biotype "protein_coding"; transcript_source "ena"; transcript_biotype "protein_coding";	46	3
DS499595	1916440	1916441	DS499595	1916584	1916587	AFUB_023600	.	+	ena	start_codon	0	gene_id "AFUB_023600"; transcript_id "EDP54304"; exon_number "1"; gene_source "ena"; gene_biotype "protein_coding"; transcript_source "ena"; transcript_biotype "protein_coding";	144	3
DS499595	1936680	1936681	DS499595	1937256	1937259	AFUB_023700	.	+	ena	start_codon	0	gene_id "AFUB_023700"; transcript_id "EDP54314"; exon_number "1"; gene_source "ena"; gene_biotype "protein_coding"; transcript_source "ena"; transcript_biotype "protein_coding";	576	3
DS499595	1938625	1938626	DS499595	1938841	1938844	AFUB_023710	.	+	ena	start_codon	0	gene_id "AFUB_023710"; transcript_id "EDP54315"; exon_number "1"; gene_source "ena"; gene_biotype "protein_coding"; transcript_source "ena"; transcript_biotype "protein_coding";	216	3
DS499595	1961176	1961177	DS499595	1961305	1961308	AFUB_023760	.	+	ena	start_codon	0	gene_id "AFUB_023760"; transcript_id "EDP54320"; exon_number "1"; gene_source "ena"; gene_biotype "protein_coding"; transcript_source "ena"; transcript_biotype "protein_coding";	129	3
DS499595	1975273	1975274	DS499595	1975474	1975477	AFUB_023810	.	+	ena	start_codon	0	gene_id "AFUB_023810"; transcript_id "EDP54325"; exon_number "1"; gene_source "ena"; gene_biotype "protein_coding"; transcript_source "ena"; transcript_biotype "protein_coding";	201	3
DS499595	1982556	1982557	DS499595	1982670	1982673	AFUB_023840	.	+	ena	start_codon	0	gene_id "AFUB_023840"; transcript_id "EDP54328"; exon_number "1"; gene_source "ena"; gene_biotype "protein_coding"; transcript_source "ena"; transcript_biotype "protein_coding";	114	3
DS499595	1987487	1987488	DS499595	1987556	1987559	AFUB_023870	.	+	ena	start_codon	0	gene_id "AFUB_023870"; transcript_id "EDP54331"; exon_number "1"; gene_source "ena"; gene_biotype "protein_coding"; transcript_source "ena"; transcript_biotype "protein_coding";	69	3
DS499595	2032605	2032606	DS499595	2032742	2032745	AFUB_023990	.	+	ena	start_codon	0	gene_id "AFUB_023990"; transcript_id "EDP54343"; exon_number "1"; gene_source "ena"; gene_biotype "protein_coding"; transcript_source "ena"; transcript_biotype "protein_coding";	137	3
DS499595	2074641	2074642	DS499595	2075025	2075028	AFUB_024080	.	+	ena	start_codon	0	gene_id "AFUB_024080"; transcript_id "EDP54352"; exon_number "1"; gene_source "ena"; gene_biotype "protein_coding"; transcript_source "ena"; transcript_biotype "protein_coding";	384	3
DS499595	2079734	2079735	DS499595	2079544	2082262	AFUB_024090	.	+	ena	CDS	0	gene_id "AFUB_024090"; transcript_id "EDP54353"; exon_number "1"; gene_source "ena"; gene_biotype "protein_coding"; transcript_source "ena"; transcript_biotype "protein_coding"; protein_id "EDP54353";	0	3
DS499595	2097387	2097388	DS499595	2097593	2097596	AFUB_024160	.	+	ena	start_codon	0	gene_id "AFUB_024160"; transcript_id "EDP54360"; exon_number "1"; gene_source "ena"; gene_biotype "protein_coding"; transcript_source "ena"; transcript_biotype "protein_coding";	206	3
DS499595	2103552	2103553	DS499595	2103955	2103958	AFUB_024190	.	+	ena	start_codon	0	gene_id "AFUB_024190"; transcript_id "EDP54363"; exon_number "1"; gene_source "ena"; gene_biotype "protein_coding"; transcript_source "ena"; transcript_biotype "protein_coding";	403	3
DS499595	2125946	2125947	DS499595	2126207	2126210	AFUB_024270	.	+	ena	start_codon	0	gene_id "AFUB_024270"; transcript_id "EDP54371"; exon_number "1"; gene_source "ena"; gene_biotype "protein_coding"; transcript_source "ena"; transcript_biotype "protein_coding";	261	3
DS499595	2163690	2163691	DS499595	2163885	2163888	AFUB_024410	.	+	ena	start_codon	0	gene_id "AFUB_024410"; transcript_id "EDP54385"; exon_number "1"; gene_source "ena"; gene_biotype "protein_coding"; transcript_source "ena"; transcript_biotype "protein_coding";	195	3
DS499595	2178579	2178580	DS499595	2178326	2178629	AFUB_024460	.	+	ena	CDS	0	gene_id "AFUB_024460"; transcript_id "EDP54390"; exon_number "1"; gene_source "ena"; gene_biotype "protein_coding"; transcript_source "ena"; transcript_biotype "protein_coding"; protein_id "EDP54390";	0	3
DS499595	2180455	2180456	DS499595	2180383	2181220	AFUB_024480	.	+	ena	gene	.	gene_id "AFUB_024480"; gene_source "ena"; gene_biotype "protein_coding";	0	3
DS499595	2187015	2187016	DS499595	2187137	2187140	AFUB_024500	.	+	ena	start_codon	0	gene_id "AFUB_024500"; transcript_id "EDP54394"; exon_number "1"; gene_source "ena"; gene_biotype "protein_coding"; transcript_source "ena"; transcript_biotype "protein_coding";	122	3
DS499595	2196101	2196102	DS499595	2195758	2196893	AFUB_024550	.	+	ena	gene	.	gene_id "AFUB_024550"; gene_source "ena"; gene_biotype "protein_coding";	0	3
DS499595	2201393	2201394	DS499595	2201749	2201752	AFUB_024570	.	+	ena	start_codon	0	gene_id "AFUB_024570"; transcript_id "EDP54401"; exon_number "1"; gene_source "ena"; gene_biotype "protein_coding"; transcript_source "ena"; transcript_biotype "protein_coding";	356	3
DS499595	2207349	2207350	DS499595	2207560	2207563	AFUB_024580	.	+	ena	start_codon	0	gene_id "AFUB_024580"; transcript_id "EDP54402"; exon_number "1"; gene_source "ena"; gene_biotype "protein_coding"; transcript_source "ena"; transcript_biotype "protein_coding";	211	3
DS499595	2224654	2224655	DS499595	2225201	2225204	AFUB_024620	.	+	ena	start_codon	0	gene_id "AFUB_024620"; transcript_id "EDP54406"; exon_number "1"; gene_source "ena"; gene_biotype "protein_coding"; transcript_source "ena"; transcript_biotype "protein_coding";	547	3
DS499595	2225043	2225044	DS499595	2225201	2225204	AFUB_024620	.	+	ena	start_codon	0	gene_id "AFUB_024620"; transcript_id "EDP54406"; exon_number "1"; gene_source "ena"; gene_biotype "protein_coding"; transcript_source "ena"; transcript_biotype "protein_coding";	158	3
DS499595	2231776	2231777	DS499595	2232080	2232083	AFUB_024660	.	+	ena	start_codon	0	gene_id "AFUB_024660"; transcript_id "EDP54410"; exon_number "1"; gene_source "ena"; gene_biotype "protein_coding"; transcript_source "ena"; transcript_biotype "protein_coding";	304	3
DS499595	2231856	2231857	DS499595	2232080	2232083	AFUB_024660	.	+	ena	start_codon	0	gene_id "AFUB_024660"; transcript_id "EDP54410"; exon_number "1"; gene_source "ena"; gene_biotype "protein_coding"; transcript_source "ena"; transcript_biotype "protein_coding";	224	3
DS499595	2244661	2244662	DS499595	2244740	2244743	AFUB_024700	.	+	ena	start_codon	0	gene_id "AFUB_024700"; transcript_id "EDP54414"; exon_number "1"; gene_source "ena"; gene_biotype "protein_coding"; transcript_source "ena"; transcript_biotype "protein_coding";	79	3
DS499595	2265274	2265275	DS499595	2265304	2265307	AFUB_024780	.	+	ena	start_codon	0	gene_id "AFUB_024780"; transcript_id "EDP54422"; exon_number "1"; gene_source "ena"; gene_biotype "protein_coding"; transcript_source "ena"; transcript_biotype "protein_coding";	30	3
DS499595	2267871	2267872	DS499595	2267944	2267947	AFUB_024800	.	+	ena	start_codon	0	gene_id "AFUB_024800"; transcript_id "EDP54424"; exon_number "1"; gene_source "ena"; gene_biotype "protein_coding"; transcript_source "ena"; transcript_biotype "protein_coding";	73	3
DS499595	2278440	2278441	DS499595	2279147	2279150	AFUB_024840	.	+	ena	start_codon	0	gene_id "AFUB_024840"; transcript_id "EDP54428"; exon_number "1"; gene_source "ena"; gene_biotype "protein_coding"; transcript_source "ena"; transcript_biotype "protein_coding";	707	3
DS499595	2295659	2295660	DS499595	2295707	2295710	AFUB_024920	.	+	ena	start_codon	0	gene_id "AFUB_024920"; transcript_id "EDP54436"; exon_number "1"; gene_source "ena"; gene_biotype "protein_coding"; transcript_source "ena"; transcript_biotype "protein_coding";	48	3
DS499595	2314345	2314346	DS499595	2314561	2314564	AFUB_024980	.	+	ena	start_codon	0	gene_id "AFUB_024980"; transcript_id "EDP54442"; exon_number "1"; gene_source "ena"; gene_biotype "protein_coding"; transcript_source "ena"; transcript_biotype "protein_coding";	216	3
DS499595	2316594	2316595	DS499595	2316670	2316673	AFUB_024990	.	+	ena	start_codon	0	gene_id "AFUB_024990"; transcript_id "EDP54443"; exon_number "1"; gene_source "ena"; gene_biotype "protein_coding"; transcript_source "ena"; transcript_biotype "protein_coding";	76	3
DS499595	2341066	2341067	DS499595	2341157	2341160	AFUB_025080	.	+	ena	start_codon	0	gene_id "AFUB_025080"; transcript_id "EDP54452"; exon_number "1"; gene_source "ena"; gene_biotype "protein_coding"; transcript_source "ena"; transcript_biotype "protein_coding";	91	3
DS499595	2342180	2342181	DS499595	2342248	2342251	AFUB_025090	.	+	ena	start_codon	0	gene_id "AFUB_025090"; transcript_id "EDP54453"; exon_number "1"; gene_source "ena"; gene_biotype "protein_coding"; transcript_source "ena"; transcript_biotype "protein_coding";	68	3
DS499595	2352299	2352300	DS499595	2352415	2352418	AFUB_025130	.	+	ena	start_codon	0	gene_id "AFUB_025130"; transcript_id "EDP54457"; exon_number "1"; gene_source "ena"; gene_biotype "protein_coding"; transcript_source "ena"; transcript_biotype "protein_coding";	116	3
DS499595	2375316	2375317	DS499595	2375616	2375619	AFUB_025210	.	+	ena	start_codon	0	gene_id "AFUB_025210"; transcript_id "EDP54465"; exon_number "1"; gene_source "ena"; gene_biotype "protein_coding"; transcript_source "ena"; transcript_biotype "protein_coding";	300	3
DS499595	2378354	2378355	DS499595	2378463	2378466	AFUB_025230	.	+	ena	start_codon	0	gene_id "AFUB_025230"; transcript_id "EDP54467"; exon_number "1"; gene_source "ena"; gene_biotype "protein_coding"; transcript_source "ena"; transcript_biotype "protein_coding";	109	3
DS499595	2401383	2401384	DS499595	2401681	2401684	AFUB_025340	.	+	ena	start_codon	0	gene_id "AFUB_025340"; transcript_id "EDP54477"; exon_number "1"; gene_source "ena"; gene_biotype "protein_coding"; transcript_source "ena"; transcript_biotype "protein_coding";	298	3
DS499595	2405151	2405152	DS499595	2405537	2405540	AFUB_025360	.	+	ena	start_codon	0	gene_id "AFUB_025360"; transcript_id "EDP54479"; exon_number "1"; gene_source "ena"; gene_biotype "protein_coding"; transcript_source "ena"; transcript_biotype "protein_coding";	386	3
DS499595	2455081	2455082	DS499595	2455071	2455407	AFUB_025510	.	+	ena	CDS	0	gene_id "AFUB_025510"; transcript_id "EDP54494"; exon_number "1"; gene_source "ena"; gene_biotype "protein_coding"; transcript_source "ena"; transcript_biotype "protein_coding"; protein_id "EDP54494";	0	3
DS499595	2464259	2464260	DS499595	2464365	2464368	AFUB_025560	.	+	ena	start_codon	0	gene_id "AFUB_025560"; transcript_id "EDP54499"; exon_number "1"; gene_source "ena"; gene_biotype "protein_coding"; transcript_source "ena"; transcript_biotype "protein_coding";	106	3
DS499595	2473411	2473412	DS499595	2473608	2473611	AFUB_025610	.	+	ena	start_codon	0	gene_id "AFUB_025610"; transcript_id "EDP54504"; exon_number "1"; gene_source "ena"; gene_biotype "protein_coding"; transcript_source "ena"; transcript_biotype "protein_coding";	197	3
DS499595	2473500	2473501	DS499595	2473608	2473611	AFUB_025610	.	+	ena	start_codon	0	gene_id "AFUB_025610"; transcript_id "EDP54504"; exon_number "1"; gene_source "ena"; gene_biotype "protein_coding"; transcript_source "ena"; transcript_biotype "protein_coding";	108	3
DS499595	2479714	2479715	DS499595	2479586	2479747	AFUB_025640	.	+	ena	CDS	0	gene_id "AFUB_025640"; transcript_id "EDP54507"; exon_number "1"; gene_source "ena"; gene_biotype "protein_coding"; transcript_source "ena"; transcript_biotype "protein_coding"; protein_id "EDP54507";	0	3
DS499595	2486831	2486832	DS499595	2486918	2486921	AFUB_025670	.	+	ena	start_codon	0	gene_id "AFUB_025670"; transcript_id "EDP54510"; exon_number "1"; gene_source "ena"; gene_biotype "protein_coding"; transcript_source "ena"; transcript_biotype "protein_coding";	87	3
DS499595	2491631	2491632	DS499595	2491798	2491801	AFUB_025690	.	+	ena	start_codon	0	gene_id "AFUB_025690"; transcript_id "EDP54512"; exon_number "1"; gene_source "ena"; gene_biotype "protein_coding"; transcript_source "ena"; transcript_biotype "protein_coding";	167	3
DS499595	2498386	2498387	DS499595	2498423	2498426	AFUB_025710	.	+	ena	start_codon	0	gene_id "AFUB_025710"; transcript_id "EDP54514"; exon_number "1"; gene_source "ena"; gene_biotype "protein_coding"; transcript_source "ena"; transcript_biotype "protein_coding";	37	3
DS499595	2498389	2498390	DS499595	2498423	2498426	AFUB_025710	.	+	ena	start_codon	0	gene_id "AFUB_025710"; transcript_id "EDP54514"; exon_number "1"; gene_source "ena"; gene_biotype "protein_coding"; transcript_source "ena"; transcript_biotype "protein_coding";	34	3
DS499595	2507475	2507476	DS499595	2507759	2507762	AFUB_025730	.	+	ena	start_codon	0	gene_id "AFUB_025730"; transcript_id "EDP54516"; exon_number "1"; gene_source "ena"; gene_biotype "protein_coding"; transcript_source "ena"; transcript_biotype "protein_coding";	284	3
DS499595	2538997	2538998	DS499595	2539271	2539274	AFUB_025830	.	+	ena	start_codon	0	gene_id "AFUB_025830"; transcript_id "EDP54525"; exon_number "1"; gene_source "ena"; gene_biotype "protein_coding"; transcript_source "ena"; transcript_biotype "protein_coding";	274	3
DS499595	2545953	2545954	DS499595	2546840	2546843	AFUB_025860	.	+	ena	start_codon	0	gene_id "AFUB_025860"; transcript_id "EDP54528"; exon_number "1"; gene_source "ena"; gene_biotype "protein_coding"; transcript_source "ena"; transcript_biotype "protein_coding";	887	3
DS499595	2561025	2561026	DS499595	2561247	2561250	AFUB_025920	.	+	ena	start_codon	0	gene_id "AFUB_025920"; transcript_id "EDP54534"; exon_number "1"; gene_source "ena"; gene_biotype "protein_coding"; transcript_source "ena"; transcript_biotype "protein_coding";	222	3
DS499595	2562877	2562878	DS499595	2562935	2562938	AFUB_025930	.	+	ena	start_codon	0	gene_id "AFUB_025930"; transcript_id "EDP54535"; exon_number "1"; gene_source "ena"; gene_biotype "protein_coding"; transcript_source "ena"; transcript_biotype "protein_coding";	58	3
DS499595	2610101	2610102	DS499595	2610135	2610138	AFUB_026100	.	+	ena	start_codon	0	gene_id "AFUB_026100"; transcript_id "EDP54551"; exon_number "1"; gene_source "ena"; gene_biotype "protein_coding"; transcript_source "ena"; transcript_biotype "protein_coding";	34	3
DS499595	2611963	2611964	DS499595	2611677	2612634	AFUB_026110	.	+	ena	gene	.	gene_id "AFUB_026110"; gene_source "ena"; gene_biotype "protein_coding";	0	3
DS499595	2629187	2629188	DS499595	2629360	2629363	AFUB_026180	.	+	ena	start_codon	0	gene_id "AFUB_026180"; transcript_id "EDP54559"; exon_number "1"; gene_source "ena"; gene_biotype "protein_coding"; transcript_source "ena"; transcript_biotype "protein_coding";	173	3
DS499595	2642483	2642484	DS499595	2642555	2642558	AFUB_026220	.	+	ena	start_codon	0	gene_id "AFUB_026220"; transcript_id "EDP54563"; exon_number "1"; gene_source "ena"; gene_biotype "protein_coding"; transcript_source "ena"; transcript_biotype "protein_coding";	72	3
DS499595	2652561	2652562	DS499595	2652903	2652906	AFUB_026260	.	+	ena	start_codon	0	gene_id "AFUB_026260"; transcript_id "EDP54567"; exon_number "1"; gene_source "ena"; gene_biotype "protein_coding"; transcript_source "ena"; transcript_biotype "protein_coding";	342	3
DS499595	2657704	2657705	DS499595	2657831	2657834	AFUB_026270	.	+	ena	start_codon	0	gene_id "AFUB_026270"; transcript_id "EDP54568"; exon_number "1"; gene_source "ena"; gene_biotype "protein_coding"; transcript_source "ena"; transcript_biotype "protein_coding";	127	3
DS499595	2664814	2664815	DS499595	2664968	2664971	AFUB_026300	.	+	ena	start_codon	0	gene_id "AFUB_026300"; transcript_id "EDP54571"; exon_number "1"; gene_source "ena"; gene_biotype "protein_coding"; transcript_source "ena"; transcript_biotype "protein_coding";	154	3
DS499595	2690450	2690451	DS499595	2690534	2690537	AFUB_026380	.	+	ena	start_codon	0	gene_id "AFUB_026380"; transcript_id "EDP54579"; exon_number "1"; gene_source "ena"; gene_biotype "protein_coding"; transcript_source "ena"; transcript_biotype "protein_coding";	84	3
DS499595	2692032	2692033	DS499595	2692225	2692228	AFUB_026390	.	+	ena	start_codon	0	gene_id "AFUB_026390"; transcript_id "EDP54580"; exon_number "1"; gene_source "ena"; gene_biotype "protein_coding"; transcript_source "ena"; transcript_biotype "protein_coding";	193	3
DS499595	2699450	2699451	DS499595	2699856	2699859	AFUB_026420	.	+	ena	start_codon	0	gene_id "AFUB_026420"; transcript_id "EDP54583"; exon_number "1"; gene_source "ena"; gene_biotype "protein_coding"; transcript_source "ena"; transcript_biotype "protein_coding";	406	3
DS499595	2712106	2712107	DS499595	2712233	2712236	AFUB_026470	.	+	ena	start_codon	0	gene_id "AFUB_026470"; transcript_id "EDP54588"; exon_number "1"; gene_source "ena"; gene_biotype "protein_coding"; transcript_source "ena"; transcript_biotype "protein_coding";	127	3
DS499595	2729524	2729525	DS499595	2729724	2729727	AFUB_026530	.	+	ena	start_codon	0	gene_id "AFUB_026530"; transcript_id "EDP54594"; exon_number "1"; gene_source "ena"; gene_biotype "protein_coding"; transcript_source "ena"; transcript_biotype "protein_coding";	200	3
DS499595	2742266	2742267	DS499595	2742739	2742742	AFUB_026550	.	+	ena	start_codon	0	gene_id "AFUB_026550"; transcript_id "EDP54596"; exon_number "1"; gene_source "ena"; gene_biotype "protein_coding"; transcript_source "ena"; transcript_biotype "protein_coding";	473	3
DS499595	2749317	2749318	DS499595	2749464	2749467	AFUB_026580	.	+	ena	start_codon	0	gene_id "AFUB_026580"; transcript_id "EDP54599"; exon_number "1"; gene_source "ena"; gene_biotype "protein_coding"; transcript_source "ena"; transcript_biotype "protein_coding";	147	3
DS499595	2750980	2750981	DS499595	2751435	2751438	AFUB_026590	.	+	ena	start_codon	0	gene_id "AFUB_026590"; transcript_id "EDP54600"; exon_number "1"; gene_source "ena"; gene_biotype "protein_coding"; transcript_source "ena"; transcript_biotype "protein_coding";	455	3
DS499595	2778407	2778408	DS499595	2778567	2778570	AFUB_026670	.	+	ena	start_codon	0	gene_id "AFUB_026670"; transcript_id "EDP54608"; exon_number "1"; gene_source "ena"; gene_biotype "protein_coding"; transcript_source "ena"; transcript_biotype "protein_coding";	160	3
DS499595	2791202	2791203	DS499595	2791368	2791371	AFUB_026720	.	+	ena	start_codon	0	gene_id "AFUB_026720"; transcript_id "EDP54613"; exon_number "1"; gene_source "ena"; gene_biotype "protein_coding"; transcript_source "ena"; transcript_biotype "protein_coding";	166	3
DS499595	2803627	2803628	DS499595	2803571	2805456	AFUB_026770	.	+	ena	gene	.	gene_id "AFUB_026770"; gene_source "ena"; gene_biotype "protein_coding";	0	3
DS499595	2805934	2805935	DS499595	2806198	2806201	AFUB_026780	.	+	ena	start_codon	0	gene_id "AFUB_026780"; transcript_id "EDP54619"; exon_number "1"; gene_source "ena"; gene_biotype "protein_coding"; transcript_source "ena"; transcript_biotype "protein_coding";	264	3
DS499595	2813746	2813747	DS499595	2813504	2814410	AFUB_026820	.	+	ena	gene	.	gene_id "AFUB_026820"; gene_source "ena"; gene_biotype "protein_coding";	0	3
DS499595	2813766	2813767	DS499595	2813504	2814410	AFUB_026820	.	+	ena	gene	.	gene_id "AFUB_026820"; gene_source "ena"; gene_biotype "protein_coding";	0	3
DS499595	2826830	2826831	DS499595	2826899	2826902	AFUB_026880	.	+	ena	start_codon	0	gene_id "AFUB_026880"; transcript_id "EDP54629"; exon_number "1"; gene_source "ena"; gene_biotype "protein_coding"; transcript_source "ena"; transcript_biotype "protein_coding";	69	3
DS499595	2831293	2831294	DS499595	2831337	2831340	AFUB_026900	.	+	ena	start_codon	0	gene_id "AFUB_026900"; transcript_id "EDP54631"; exon_number "1"; gene_source "ena"; gene_biotype "protein_coding"; transcript_source "ena"; transcript_biotype "protein_coding";	44	3
DS499595	2832873	2832874	DS499595	2832962	2832965	AFUB_026910	.	+	ena	start_codon	0	gene_id "AFUB_026910"; transcript_id "EDP54632"; exon_number "1"; gene_source "ena"; gene_biotype "protein_coding"; transcript_source "ena"; transcript_biotype "protein_coding";	89	3
DS499595	2866281	2866282	DS499595	2866381	2866384	AFUB_027000	.	+	ena	start_codon	0	gene_id "AFUB_027000"; transcript_id "EDP54640"; exon_number "1"; gene_source "ena"; gene_biotype "protein_coding"; transcript_source "ena"; transcript_biotype "protein_coding";	100	3
DS499595	2870752	2870753	DS499595	2870907	2870910	AFUB_027020	.	+	ena	start_codon	0	gene_id "AFUB_027020"; transcript_id "EDP54642"; exon_number "1"; gene_source "ena"; gene_biotype "protein_coding"; transcript_source "ena"; transcript_biotype "protein_coding";	155	3
DS499595	2887986	2887987	DS499595	2888366	2888369	AFUB_027060	.	+	ena	start_codon	0	gene_id "AFUB_027060"; transcript_id "EDP54646"; exon_number "1"; gene_source "ena"; gene_biotype "protein_coding"; transcript_source "ena"; transcript_biotype "protein_coding";	380	3
DS499595	2896796	2896797	DS499595	2896891	2896894	AFUB_027090	.	+	ena	start_codon	0	gene_id "AFUB_027090"; transcript_id "EDP54649"; exon_number "1"; gene_source "ena"; gene_biotype "protein_coding"; transcript_source "ena"; transcript_biotype "protein_coding";	95	3
DS499595	2922375	2922376	DS499595	2922513	2922516	AFUB_027180	.	+	ena	start_codon	0	gene_id "AFUB_027180"; transcript_id "EDP54658"; exon_number "1"; gene_source "ena"; gene_biotype "protein_coding"; transcript_source "ena"; transcript_biotype "protein_coding";	138	3
DS499595	2944727	2944728	DS499595	2945010	2945013	AFUB_027260	.	+	ena	start_codon	0	gene_id "AFUB_027260"; transcript_id "EDP54666"; exon_number "1"; gene_source "ena"; gene_biotype "protein_coding"; transcript_source "ena"; transcript_biotype "protein_coding";	283	3
DS499595	2981476	2981477	DS499595	2981866	2981869	AFUB_027440	.	+	ena	start_codon	0	gene_id "AFUB_027440"; transcript_id "EDP54683"; exon_number "1"; gene_source "ena"; gene_biotype "protein_coding"; transcript_source "ena"; transcript_biotype "protein_coding";	390	3
DS499595	2981689	2981690	DS499595	2981866	2981869	AFUB_027440	.	+	ena	start_codon	0	gene_id "AFUB_027440"; transcript_id "EDP54683"; exon_number "1"; gene_source "ena"; gene_biotype "protein_coding"; transcript_source "ena"; transcript_biotype "protein_coding";	177	3
DS499595	3016774	3016775	DS499595	3017388	3017391	AFUB_027540	.	+	ena	start_codon	0	gene_id "AFUB_027540"; transcript_id "EDP54693"; exon_number "1"; gene_source "ena"; gene_biotype "protein_coding"; transcript_source "ena"; transcript_biotype "protein_coding";	614	3
DS499595	3019128	3019129	DS499595	3019361	3019364	AFUB_027550	.	+	ena	start_codon	0	gene_id "AFUB_027550"; transcript_id "EDP54694"; exon_number "1"; gene_source "ena"; gene_biotype "protein_coding"; transcript_source "ena"; transcript_biotype "protein_coding";	233	3
DS499595	3039544	3039545	DS499595	3039588	3039590	AFUB_027590	.	+	ena	CDS	0	gene_id "AFUB_027590"; transcript_id "EDP54698"; exon_number "1"; gene_source "ena"; gene_biotype "protein_coding"; transcript_source "ena"; transcript_biotype "protein_coding"; protein_id "EDP54698";	44	3
DS499595	3039554	3039555	DS499595	3039588	3039590	AFUB_027590	.	+	ena	CDS	0	gene_id "AFUB_027590"; transcript_id "EDP54698"; exon_number "1"; gene_source "ena"; gene_biotype "protein_coding"; transcript_source "ena"; transcript_biotype "protein_coding"; protein_id "EDP54698";	34	3
DS499595	3062465	3062466	DS499595	3062581	3062584	AFUB_027690	.	+	ena	start_codon	0	gene_id "AFUB_027690"; transcript_id "EDP54708"; exon_number "1"; gene_source "ena"; gene_biotype "protein_coding"; transcript_source "ena"; transcript_biotype "protein_coding";	116	3
DS499595	3078015	3078016	DS499595	3078215	3078218	AFUB_027750	.	+	ena	start_codon	0	gene_id "AFUB_027750"; transcript_id "EDP54715"; exon_number "1"; gene_source "ena"; gene_biotype "protein_coding"; transcript_source "ena"; transcript_biotype "protein_coding";	200	3
DS499595	3118982	3118983	DS499595	3119066	3119069	AFUB_027880	.	+	ena	start_codon	0	gene_id "AFUB_027880"; transcript_id "EDP54728"; exon_number "1"; gene_source "ena"; gene_biotype "protein_coding"; transcript_source "ena"; transcript_biotype "protein_coding";	84	3
DS499595	3130585	3130586	DS499595	3130639	3130642	AFUB_027920	.	+	ena	start_codon	0	gene_id "AFUB_027920"; transcript_id "EDP54732"; exon_number "1"; gene_source "ena"; gene_biotype "protein_coding"; transcript_source "ena"; transcript_biotype "protein_coding";	54	3
DS499595	3141609	3141610	DS499595	3142218	3142221	AFUB_027970	.	+	ena	start_codon	0	gene_id "AFUB_027970"; transcript_id "EDP54737"; exon_number "1"; gene_source "ena"; gene_biotype "protein_coding"; transcript_source "ena"; transcript_biotype "protein_coding";	609	3
DS499595	3146170	3146171	DS499595	3146006	3146592	AFUB_027990	.	+	ena	CDS	0	gene_id "AFUB_027990"; transcript_id "EDP54739"; exon_number "1"; gene_source "ena"; gene_biotype "protein_coding"; transcript_source "ena"; transcript_biotype "protein_coding"; protein_id "EDP54739";	0	3
DS499595	3158849	3158850	DS499595	3159093	3159096	AFUB_028040	.	+	ena	start_codon	0	gene_id "AFUB_028040"; transcript_id "EDP54744"; exon_number "1"; gene_source "ena"; gene_biotype "protein_coding"; transcript_source "ena"; transcript_biotype "protein_coding";	244	3
DS499595	3159080	3159081	DS499595	3159093	3159096	AFUB_028040	.	+	ena	start_codon	0	gene_id "AFUB_028040"; transcript_id "EDP54744"; exon_number "1"; gene_source "ena"; gene_biotype "protein_coding"; transcript_source "ena"; transcript_biotype "protein_coding";	13	3
DS499595	3164002	3164003	DS499595	3164093	3164096	AFUB_028060	.	+	ena	start_codon	0	gene_id "AFUB_028060"; transcript_id "EDP54746"; exon_number "1"; gene_source "ena"; gene_biotype "protein_coding"; transcript_source "ena"; transcript_biotype "protein_coding";	91	3
DS499595	3173246	3173247	DS499595	3173620	3173623	AFUB_028090	.	+	ena	start_codon	0	gene_id "AFUB_028090"; transcript_id "EDP54749"; exon_number "1"; gene_source "ena"; gene_biotype "protein_coding"; transcript_source "ena"; transcript_biotype "protein_coding";	374	3
DS499595	3178268	3178269	DS499595	3178342	3178345	AFUB_028110	.	+	ena	start_codon	0	gene_id "AFUB_028110"; transcript_id "EDP54751"; exon_number "1"; gene_source "ena"; gene_biotype "protein_coding"; transcript_source "ena"; transcript_biotype "protein_coding";	74	3
DS499595	3180508	3180509	DS499595	3180607	3180610	AFUB_028130	.	+	ena	start_codon	0	gene_id "AFUB_028130"; transcript_id "EDP54753"; exon_number "1"; gene_source "ena"; gene_biotype "protein_coding"; transcript_source "ena"; transcript_biotype "protein_coding";	99	3
DS499595	3195074	3195075	DS499595	3194138	3198266	AFUB_028180	.	+	ena	gene	.	gene_id "AFUB_028180"; gene_source "ena"; gene_biotype "protein_coding";	0	3
DS499595	3199499	3199500	DS499595	3199622	3199625	AFUB_028190	.	+	ena	start_codon	0	gene_id "AFUB_028190"; transcript_id "EDP54759"; exon_number "1"; gene_source "ena"; gene_biotype "protein_coding"; transcript_source "ena"; transcript_biotype "protein_coding";	123	3
DS499595	3208301	3208302	DS499595	3208632	3208635	AFUB_028210	.	+	ena	start_codon	0	gene_id "AFUB_028210"; transcript_id "EDP54761"; exon_number "1"; gene_source "ena"; gene_biotype "protein_coding"; transcript_source "ena"; transcript_biotype "protein_coding";	331	3
DS499595	3211842	3211843	DS499595	3211904	3211907	AFUB_028220	.	+	ena	start_codon	0	gene_id "AFUB_028220"; transcript_id "EDP54762"; exon_number "1"; gene_source "ena"; gene_biotype "protein_coding"; transcript_source "ena"; transcript_biotype "protein_coding";	62	3
DS499595	3279290	3279291	DS499595	3279399	3279402	AFUB_028490	.	+	ena	start_codon	0	gene_id "AFUB_028490"; transcript_id "EDP54789"; exon_number "1"; gene_source "ena"; gene_biotype "protein_coding"; transcript_source "ena"; transcript_biotype "protein_coding";	109	3
DS499595	3315223	3315224	DS499595	3315329	3315332	AFUB_028610	.	+	ena	start_codon	0	gene_id "AFUB_028610"; transcript_id "EDP54801"; exon_number "1"; gene_source "ena"; gene_biotype "protein_coding"; transcript_source "ena"; transcript_biotype "protein_coding";	106	3
DS499595	3316949	3316950	DS499595	3317010	3317013	AFUB_028630	.	+	ena	start_codon	0	gene_id "AFUB_028630"; transcript_id "EDP54803"; exon_number "1"; gene_source "ena"; gene_biotype "protein_coding"; transcript_source "ena"; transcript_biotype "protein_coding";	61	3
DS499595	3321458	3321459	DS499595	3321501	3321504	AFUB_028660	.	+	ena	start_codon	0	gene_id "AFUB_028660"; transcript_id "EDP54806"; exon_number "1"; gene_source "ena"; gene_biotype "protein_coding"; transcript_source "ena"; transcript_biotype "protein_coding";	43	3
DS499595	3327763	3327764	DS499595	3327993	3327996	AFUB_028690	.	+	ena	start_codon	0	gene_id "AFUB_028690"; transcript_id "EDP54809"; exon_number "1"; gene_source "ena"; gene_biotype "protein_coding"; transcript_source "ena"; transcript_biotype "protein_coding";	230	3
DS499595	3327929	3327930	DS499595	3327993	3327996	AFUB_028690	.	+	ena	start_codon	0	gene_id "AFUB_028690"; transcript_id "EDP54809"; exon_number "1"; gene_source "ena"; gene_biotype "protein_coding"; transcript_source "ena"; transcript_biotype "protein_coding";	64	3
DS499595	3334346	3334347	DS499595	3334949	3334952	AFUB_028710	.	+	ena	start_codon	0	gene_id "AFUB_028710"; transcript_id "EDP54811"; exon_number "1"; gene_source "ena"; gene_biotype "protein_coding"; transcript_source "ena"; transcript_biotype "protein_coding";	603	3
DS499595	3344292	3344293	DS499595	3344381	3344384	AFUB_028750	.	+	ena	start_codon	0	gene_id "AFUB_028750"; transcript_id "EDP54815"; exon_number "1"; gene_source "ena"; gene_biotype "protein_coding"; transcript_source "ena"; transcript_biotype "protein_coding";	89	3
DS499595	3359908	3359909	DS499595	3360251	3360254	AFUB_028790	.	+	ena	start_codon	0	gene_id "AFUB_028790"; transcript_id "EDP54819"; exon_number "1"; gene_source "ena"; gene_biotype "protein_coding"; transcript_source "ena"; transcript_biotype "protein_coding";	343	3
DS499595	3377573	3377574	DS499595	3377689	3377692	AFUB_028870	.	+	ena	start_codon	0	gene_id "AFUB_028870"; transcript_id "EDP54827"; exon_number "1"; gene_source "ena"; gene_biotype "protein_coding"; transcript_source "ena"; transcript_biotype "protein_coding";	116	3
DS499595	3406929	3406930	DS499595	3407002	3407005	AFUB_028939	.	+	ena	start_codon	0	gene_id "AFUB_028939"; transcript_id "EDP54834"; exon_number "1"; gene_source "ena"; gene_biotype "protein_coding"; transcript_source "ena"; transcript_biotype "protein_coding";	73	3
DS499595	3406968	3406969	DS499595	3407002	3407005	AFUB_028939	.	+	ena	start_codon	0	gene_id "AFUB_028939"; transcript_id "EDP54834"; exon_number "1"; gene_source "ena"; gene_biotype "protein_coding"; transcript_source "ena"; transcript_biotype "protein_coding";	34	3
DS499595	3413892	3413893	DS499595	3414124	3414127	AFUB_028970	.	+	ena	start_codon	0	gene_id "AFUB_028970"; transcript_id "EDP54838"; exon_number "1"; gene_source "ena"; gene_biotype "protein_coding"; transcript_source "ena"; transcript_biotype "protein_coding";	232	3
DS499595	3431976	3431977	DS499595	3432079	3432082	AFUB_029040	.	+	ena	start_codon	0	gene_id "AFUB_029040"; transcript_id "EDP54845"; exon_number "1"; gene_source "ena"; gene_biotype "protein_coding"; transcript_source "ena"; transcript_biotype "protein_coding";	103	3
DS499595	3491177	3491178	DS499595	3491378	3491381	AFUB_029170	.	+	ena	start_codon	0	gene_id "AFUB_029170"; transcript_id "EDP54858"; exon_number "1"; gene_source "ena"; gene_biotype "protein_coding"; transcript_source "ena"; transcript_biotype "protein_coding";	201	3
DS499595	3506106	3506107	DS499595	3506149	3506152	AFUB_029220	.	+	ena	start_codon	0	gene_id "AFUB_029220"; transcript_id "EDP54863"; exon_number "1"; gene_source "ena"; gene_biotype "protein_coding"; transcript_source "ena"; transcript_biotype "protein_coding";	43	3
DS499595	3508033	3508034	DS499595	3508254	3508257	AFUB_029230	.	+	ena	start_codon	0	gene_id "AFUB_029230"; transcript_id "EDP54864"; exon_number "1"; gene_source "ena"; gene_biotype "protein_coding"; transcript_source "ena"; transcript_biotype "protein_coding";	221	3
DS499595	3529261	3529262	DS499595	3529996	3529999	AFUB_029320	.	+	ena	start_codon	0	gene_id "AFUB_029320"; transcript_id "EDP54873"; exon_number "1"; gene_source "ena"; gene_biotype "protein_coding"; transcript_source "ena"; transcript_biotype "protein_coding";	735	3
DS499595	3532000	3532001	DS499595	3532252	3532255	AFUB_029330	.	+	ena	start_codon	0	gene_id "AFUB_029330"; transcript_id "EDP54874"; exon_number "1"; gene_source "ena"; gene_biotype "protein_coding"; transcript_source "ena"; transcript_biotype "protein_coding";	252	3
DS499595	3571001	3571002	DS499595	3571223	3571226	AFUB_029450	.	+	ena	start_codon	0	gene_id "AFUB_029450"; transcript_id "EDP54886"; exon_number "1"; gene_source "ena"; gene_biotype "protein_coding"; transcript_source "ena"; transcript_biotype "protein_coding";	222	3
DS499595	3588247	3588248	DS499595	3589074	3589077	AFUB_029480	.	+	ena	start_codon	0	gene_id "AFUB_029480"; transcript_id "EDP54889"; exon_number "1"; gene_source "ena"; gene_biotype "protein_coding"; transcript_source "ena"; transcript_biotype "protein_coding";	827	3
DS499595	3592615	3592616	DS499595	3592825	3592828	AFUB_029490	.	+	ena	start_codon	0	gene_id "AFUB_029490"; transcript_id "EDP54890"; exon_number "1"; gene_source "ena"; gene_biotype "protein_coding"; transcript_source "ena"; transcript_biotype "protein_coding";	210	3
DS499595	3608153	3608154	DS499595	3608560	3608563	AFUB_029570	.	+	ena	start_codon	0	gene_id "AFUB_029570"; transcript_id "EDP54897"; exon_number "1"; gene_source "ena"; gene_biotype "protein_coding"; transcript_source "ena"; transcript_biotype "protein_coding";	407	3
DS499595	3621218	3621219	DS499595	3621349	3621352	AFUB_029590	.	+	ena	start_codon	0	gene_id "AFUB_029590"; transcript_id "EDP54899"; exon_number "1"; gene_source "ena"; gene_biotype "protein_coding"; transcript_source "ena"; transcript_biotype "protein_coding";	131	3
DS499595	3651304	3651305	DS499595	3651347	3651350	AFUB_029690	.	+	ena	start_codon	0	gene_id "AFUB_029690"; transcript_id "EDP54909"; exon_number "1"; gene_source "ena"; gene_biotype "protein_coding"; transcript_source "ena"; transcript_biotype "protein_coding";	43	3
DS499595	3656739	3656740	DS499595	3656802	3656805	AFUB_029710	.	+	ena	start_codon	0	gene_id "AFUB_029710"; transcript_id "EDP54911"; exon_number "1"; gene_source "ena"; gene_biotype "protein_coding"; transcript_source "ena"; transcript_biotype "protein_coding";	63	3
DS499595	3662660	3662661	DS499595	3662991	3662994	AFUB_029730	.	+	ena	start_codon	0	gene_id "AFUB_029730"; transcript_id "EDP54913"; exon_number "1"; gene_source "ena"; gene_biotype "protein_coding"; transcript_source "ena"; transcript_biotype "protein_coding";	331	3
DS499595	3674851	3674852	DS499595	3674911	3674914	AFUB_029760	.	+	ena	start_codon	0	gene_id "AFUB_029760"; transcript_id "EDP54916"; exon_number "1"; gene_source "ena"; gene_biotype "protein_coding"; transcript_source "ena"; transcript_biotype "protein_coding";	60	3
DS499595	3687747	3687748	DS499595	3687892	3687895	AFUB_029810	.	+	ena	start_codon	0	gene_id "AFUB_029810"; transcript_id "EDP54921"; exon_number "1"; gene_source "ena"; gene_biotype "protein_coding"; transcript_source "ena"; transcript_biotype "protein_coding";	145	3
DS499595	3691340	3691341	DS499595	3691684	3691687	AFUB_029820	.	+	ena	start_codon	0	gene_id "AFUB_029820"; transcript_id "EDP54922"; exon_number "1"; gene_source "ena"; gene_biotype "protein_coding"; transcript_source "ena"; transcript_biotype "protein_coding";	344	3
DS499595	3694391	3694392	DS499595	3694209	3696454	AFUB_029830	.	+	ena	gene	.	gene_id "AFUB_029830"; gene_source "ena"; gene_biotype "protein_coding";	0	3
DS499595	3707651	3707652	DS499595	3707844	3707847	AFUB_029880	.	+	ena	start_codon	0	gene_id "AFUB_029880"; transcript_id "EDP54928"; exon_number "1"; gene_source "ena"; gene_biotype "protein_coding"; transcript_source "ena"; transcript_biotype "protein_coding";	193	3
DS499595	3739959	3739960	DS499595	3740013	3740016	AFUB_030020	.	+	ena	start_codon	0	gene_id "AFUB_030020"; transcript_id "EDP54942"; exon_number "1"; gene_source "ena"; gene_biotype "protein_coding"; transcript_source "ena"; transcript_biotype "protein_coding";	54	3
DS499595	3756962	3756963	DS499595	3757034	3757037	AFUB_030080	.	+	ena	start_codon	0	gene_id "AFUB_030080"; transcript_id "EDP54948"; exon_number "1"; gene_source "ena"; gene_biotype "protein_coding"; transcript_source "ena"; transcript_biotype "protein_coding";	72	3
DS499595	3789093	3789094	DS499595	3789340	3789343	AFUB_030200	.	+	ena	start_codon	0	gene_id "AFUB_030200"; transcript_id "EDP54960"; exon_number "1"; gene_source "ena"; gene_biotype "protein_coding"; transcript_source "ena"; transcript_biotype "protein_coding";	247	3
DS499595	3796197	3796198	DS499595	3796355	3796358	AFUB_030220	.	+	ena	start_codon	0	gene_id "AFUB_030220"; transcript_id "EDP54962"; exon_number "1"; gene_source "ena"; gene_biotype "protein_coding"; transcript_source "ena"; transcript_biotype "protein_coding";	158	3
DS499595	3823667	3823668	DS499595	3823752	3823755	AFUB_030310	.	+	ena	start_codon	0	gene_id "AFUB_030310"; transcript_id "EDP54970"; exon_number "1"; gene_source "ena"; gene_biotype "protein_coding"; transcript_source "ena"; transcript_biotype "protein_coding";	85	3
DS499595	3831817	3831818	DS499595	3831997	3832000	AFUB_030330	.	+	ena	start_codon	0	gene_id "AFUB_030330"; transcript_id "EDP54972"; exon_number "1"; gene_source "ena"; gene_biotype "protein_coding"; transcript_source "ena"; transcript_biotype "protein_coding";	180	3
DS499595	3887199	3887200	DS499595	3887264	3887267	AFUB_030460	.	+	ena	start_codon	0	gene_id "AFUB_030460"; transcript_id "EDP54985"; exon_number "1"; gene_source "ena"; gene_biotype "protein_coding"; transcript_source "ena"; transcript_biotype "protein_coding";	65	3
DS499595	3916325	3916326	DS499595	3916542	3916545	AFUB_030610	.	+	ena	start_codon	0	gene_id "AFUB_030610"; transcript_id "EDP55000"; exon_number "1"; gene_source "ena"; gene_biotype "protein_coding"; transcript_source "ena"; transcript_biotype "protein_coding";	217	3
DS499595	3955947	3955948	DS499595	3956110	3956113	AFUB_030720	.	+	ena	start_codon	0	gene_id "AFUB_030720"; transcript_id "EDP55011"; exon_number "1"; gene_source "ena"; gene_biotype "protein_coding"; transcript_source "ena"; transcript_biotype "protein_coding";	163	3
DS499595	4004978	4004979	DS499595	4005131	4005134	AFUB_030880	.	+	ena	start_codon	0	gene_id "AFUB_030880"; transcript_id "EDP55027"; exon_number "1"; gene_source "ena"; gene_biotype "protein_coding"; transcript_source "ena"; transcript_biotype "protein_coding";	153	3
DS499595	4006156	4006157	DS499595	4006368	4006371	AFUB_030890	.	+	ena	start_codon	0	gene_id "AFUB_030890"; transcript_id "EDP55028"; exon_number "1"; gene_source "ena"; gene_biotype "protein_coding"; transcript_source "ena"; transcript_biotype "protein_coding";	212	3
DS499595	4027819	4027820	DS499595	4027894	4027897	AFUB_030960	.	+	ena	start_codon	0	gene_id "AFUB_030960"; transcript_id "EDP55035"; exon_number "1"; gene_source "ena"; gene_biotype "protein_coding"; transcript_source "ena"; transcript_biotype "protein_coding";	75	3
DS499595	4072580	4072581	DS499595	4072840	4072843	AFUB_031190	.	+	ena	start_codon	0	gene_id "AFUB_031190"; transcript_id "EDP55058"; exon_number "1"; gene_source "ena"; gene_biotype "protein_coding"; transcript_source "ena"; transcript_biotype "protein_coding";	260	3
DS499595	4080224	4080225	DS499595	4080441	4080444	AFUB_031220	.	+	ena	start_codon	0	gene_id "AFUB_031220"; transcript_id "EDP55061"; exon_number "1"; gene_source "ena"; gene_biotype "protein_coding"; transcript_source "ena"; transcript_biotype "protein_coding";	217	3
DS499595	4082292	4082293	DS499595	4082414	4082417	AFUB_031230	.	+	ena	start_codon	0	gene_id "AFUB_031230"; transcript_id "EDP55062"; exon_number "1"; gene_source "ena"; gene_biotype "protein_coding"; transcript_source "ena"; transcript_biotype "protein_coding";	122	3
DS499595	4084698	4084699	DS499595	4084959	4084962	AFUB_031240	.	+	ena	start_codon	0	gene_id "AFUB_031240"; transcript_id "EDP55063"; exon_number "1"; gene_source "ena"; gene_biotype "protein_coding"; transcript_source "ena"; transcript_biotype "protein_coding";	261	3
DS499595	4111438	4111439	DS499595	4111504	4111507	AFUB_031310	.	+	ena	start_codon	0	gene_id "AFUB_031310"; transcript_id "EDP55070"; exon_number "1"; gene_source "ena"; gene_biotype "protein_coding"; transcript_source "ena"; transcript_biotype "protein_coding";	66	3
DS499595	4136665	4136666	DS499595	4137087	4137090	AFUB_031410	.	+	ena	start_codon	0	gene_id "AFUB_031410"; transcript_id "EDP55080"; exon_number "1"; gene_source "ena"; gene_biotype "protein_coding"; transcript_source "ena"; transcript_biotype "protein_coding";	422	3
DS499595	4149803	4149804	DS499595	4150081	4150084	AFUB_031450	.	+	ena	start_codon	0	gene_id "AFUB_031450"; transcript_id "EDP55084"; exon_number "1"; gene_source "ena"; gene_biotype "protein_coding"; transcript_source "ena"; transcript_biotype "protein_coding";	278	3
DS499595	4161456	4161457	DS499595	4161514	4161539	AFUB_031510	.	+	ena	five_prime_utr	.	gene_id "AFUB_031510"; transcript_id "EDP55089"; gene_source "ena"; gene_biotype "protein_coding"; transcript_source "ena"; transcript_biotype "protein_coding";	58	3
DS499595	4197060	4197061	DS499595	4197332	4197335	AFUB_031650	.	+	ena	start_codon	0	gene_id "AFUB_031650"; transcript_id "EDP55103"; exon_number "1"; gene_source "ena"; gene_biotype "protein_coding"; transcript_source "ena"; transcript_biotype "protein_coding";	272	3
DS499595	4212157	4212158	DS499595	4212214	4212217	AFUB_031700	.	+	ena	start_codon	0	gene_id "AFUB_031700"; transcript_id "EDP55108"; exon_number "1"; gene_source "ena"; gene_biotype "protein_coding"; transcript_source "ena"; transcript_biotype "protein_coding";	57	3
DS499595	4225938	4225939	DS499595	4226023	4226026	AFUB_031740	.	+	ena	start_codon	0	gene_id "AFUB_031740"; transcript_id "EDP55112"; exon_number "1"; gene_source "ena"; gene_biotype "protein_coding"; transcript_source "ena"; transcript_biotype "protein_coding";	85	3
DS499595	4242254	4242255	DS499595	4242345	4242348	AFUB_031800	.	+	ena	start_codon	0	gene_id "AFUB_031800"; transcript_id "EDP55118"; exon_number "1"; gene_source "ena"; gene_biotype "protein_coding"; transcript_source "ena"; transcript_biotype "protein_coding";	91	3
DS499595	4255422	4255423	DS499595	4256278	4256281	AFUB_031840	.	+	ena	start_codon	0	gene_id "AFUB_031840"; transcript_id "EDP55122"; exon_number "1"; gene_source "ena"; gene_biotype "protein_coding"; transcript_source "ena"; transcript_biotype "protein_coding";	856	3
DS499595	4262619	4262620	DS499595	4262975	4262978	AFUB_031860	.	+	ena	start_codon	0	gene_id "AFUB_031860"; transcript_id "EDP55124"; exon_number "1"; gene_source "ena"; gene_biotype "protein_coding"; transcript_source "ena"; transcript_biotype "protein_coding";	356	3
DS499595	4282553	4282554	DS499595	4282926	4282929	AFUB_031920	.	+	ena	start_codon	0	gene_id "AFUB_031920"; transcript_id "EDP55130"; exon_number "1"; gene_source "ena"; gene_biotype "protein_coding"; transcript_source "ena"; transcript_biotype "protein_coding";	373	3
DS499595	4282718	4282719	DS499595	4282926	4282929	AFUB_031920	.	+	ena	start_codon	0	gene_id "AFUB_031920"; transcript_id "EDP55130"; exon_number "1"; gene_source "ena"; gene_biotype "protein_coding"; transcript_source "ena"; transcript_biotype "protein_coding";	208	3
DS499595	4289684	4289685	DS499595	4290034	4290037	AFUB_031940	.	+	ena	start_codon	0	gene_id "AFUB_031940"; transcript_id "EDP55132"; exon_number "1"; gene_source "ena"; gene_biotype "protein_coding"; transcript_source "ena"; transcript_biotype "protein_coding";	350	3
DS499595	4312103	4312104	DS499595	4312729	4312732	AFUB_032010	.	+	ena	start_codon	0	gene_id "AFUB_032010"; transcript_id "EDP55139"; exon_number "1"; gene_source "ena"; gene_biotype "protein_coding"; transcript_source "ena"; transcript_biotype "protein_coding";	626	3
DS499595	4314925	4314926	DS499595	4315041	4315044	AFUB_032030	.	+	ena	start_codon	0	gene_id "AFUB_032030"; transcript_id "EDP55141"; exon_number "1"; gene_source "ena"; gene_biotype "protein_coding"; transcript_source "ena"; transcript_biotype "protein_coding";	116	3
DS499595	4325788	4325789	DS499595	4325836	4325839	AFUB_032080	.	+	ena	start_codon	0	gene_id "AFUB_032080"; transcript_id "EDP55146"; exon_number "1"; gene_source "ena"; gene_biotype "protein_coding"; transcript_source "ena"; transcript_biotype "protein_coding";	48	3
DS499595	4364628	4364629	DS499595	4364738	4364741	AFUB_032210	.	+	ena	start_codon	0	gene_id "AFUB_032210"; transcript_id "EDP55158"; exon_number "1"; gene_source "ena"; gene_biotype "protein_coding"; transcript_source "ena"; transcript_biotype "protein_coding";	110	3
DS499595	4387723	4387724	DS499595	4388245	4388248	AFUB_032300	.	+	ena	start_codon	0	gene_id "AFUB_032300"; transcript_id "EDP55167"; exon_number "1"; gene_source "ena"; gene_biotype "protein_coding"; transcript_source "ena"; transcript_biotype "protein_coding";	522	3
DS499595	4402647	4402648	DS499595	4402796	4402799	AFUB_032350	.	+	ena	start_codon	0	gene_id "AFUB_032350"; transcript_id "EDP55172"; exon_number "1"; gene_source "ena"; gene_biotype "protein_coding"; transcript_source "ena"; transcript_biotype "protein_coding";	149	3
DS499595	4408828	4408829	DS499595	4408889	4408892	AFUB_032380	.	+	ena	start_codon	0	gene_id "AFUB_032380"; transcript_id "EDP55175"; exon_number "1"; gene_source "ena"; gene_biotype "protein_coding"; transcript_source "ena"; transcript_biotype "protein_coding";	61	3
DS499595	4417245	4417246	DS499595	4417332	4417335	AFUB_032420	.	+	ena	start_codon	0	gene_id "AFUB_032420"; transcript_id "EDP55179"; exon_number "1"; gene_source "ena"; gene_biotype "protein_coding"; transcript_source "ena"; transcript_biotype "protein_coding";	87	3
DS499595	4431359	4431360	DS499595	4431760	4431763	AFUB_032470	.	+	ena	start_codon	0	gene_id "AFUB_032470"; transcript_id "EDP55184"; exon_number "1"; gene_source "ena"; gene_biotype "protein_coding"; transcript_source "ena"; transcript_biotype "protein_coding";	401	3
DS499595	4466435	4466436	DS499595	4466594	4466597	AFUB_032570	.	+	ena	start_codon	0	gene_id "AFUB_032570"; transcript_id "EDP55193"; exon_number "1"; gene_source "ena"; gene_biotype "protein_coding"; transcript_source "ena"; transcript_biotype "protein_coding";	159	3
DS499595	4483570	4483571	DS499595	4483602	4483605	AFUB_032650	.	+	ena	start_codon	0	gene_id "AFUB_032650"; transcript_id "EDP55201"; exon_number "1"; gene_source "ena"; gene_biotype "protein_coding"; transcript_source "ena"; transcript_biotype "protein_coding";	32	3
DS499595	4506511	4506512	DS499595	4506557	4506560	AFUB_032720	.	+	ena	start_codon	0	gene_id "AFUB_032720"; transcript_id "EDP55208"; exon_number "1"; gene_source "ena"; gene_biotype "protein_coding"; transcript_source "ena"; transcript_biotype "protein_coding";	46	3
DS499595	4506513	4506514	DS499595	4506557	4506560	AFUB_032720	.	+	ena	start_codon	0	gene_id "AFUB_032720"; transcript_id "EDP55208"; exon_number "1"; gene_source "ena"; gene_biotype "protein_coding"; transcript_source "ena"; transcript_biotype "protein_coding";	44	3
DS499595	4507874	4507875	DS499595	4509324	4509327	AFUB_032730	.	+	ena	start_codon	0	gene_id "AFUB_032730"; transcript_id "EDP55209"; exon_number "1"; gene_source "ena"; gene_biotype "protein_coding"; transcript_source "ena"; transcript_biotype "protein_coding";	1450	3
DS499595	4514514	4514515	DS499595	4514581	4514584	AFUB_032760	.	+	ena	start_codon	0	gene_id "AFUB_032760"; transcript_id "EDP55212"; exon_number "1"; gene_source "ena"; gene_biotype "protein_coding"; transcript_source "ena"; transcript_biotype "protein_coding";	67	3
DS499595	4516112	4516113	DS499595	4516356	4516359	AFUB_032770	.	+	ena	start_codon	0	gene_id "AFUB_032770"; transcript_id "EDP55213"; exon_number "1"; gene_source "ena"; gene_biotype "protein_coding"; transcript_source "ena"; transcript_biotype "protein_coding";	244	3
DS499595	4555135	4555136	DS499595	4556264	4556267	AFUB_032870	.	+	ena	start_codon	0	gene_id "AFUB_032870"; transcript_id "EDP55223"; exon_number "1"; gene_source "ena"; gene_biotype "protein_coding"; transcript_source "ena"; transcript_biotype "protein_coding";	1129	3
DS499595	4580589	4580590	DS499595	4580616	4580619	AFUB_032960	.	+	ena	start_codon	0	gene_id "AFUB_032960"; transcript_id "EDP55232"; exon_number "1"; gene_source "ena"; gene_biotype "protein_coding"; transcript_source "ena"; transcript_biotype "protein_coding";	27	3
DS499596	31621	31622	DS499596	31733	31736	AFUB_033900	.	+	ena	start_codon	0	gene_id "AFUB_033900"; transcript_id "EDP52226"; exon_number "1"; gene_source "ena"; gene_biotype "protein_coding"; transcript_source "ena"; transcript_biotype "protein_coding";	112	3
DS499596	104022	104023	DS499596	104058	104061	AFUB_034220	.	+	ena	start_codon	0	gene_id "AFUB_034220"; transcript_id "EDP52258"; exon_number "1"; gene_source "ena"; gene_biotype "protein_coding"; transcript_source "ena"; transcript_biotype "protein_coding";	36	3
DS499596	110506	110507	DS499596	110562	110565	AFUB_034260	.	+	ena	start_codon	0	gene_id "AFUB_034260"; transcript_id "EDP52262"; exon_number "1"; gene_source "ena"; gene_biotype "protein_coding"; transcript_source "ena"; transcript_biotype "protein_coding";	56	3
DS499596	116624	116625	DS499596	116702	116705	AFUB_034300	.	+	ena	start_codon	0	gene_id "AFUB_034300"; transcript_id "EDP52266"; exon_number "1"; gene_source "ena"; gene_biotype "protein_coding"; transcript_source "ena"; transcript_biotype "protein_coding";	78	3
DS499596	177537	177538	DS499596	177583	177586	AFUB_034570	.	+	ena	start_codon	0	gene_id "AFUB_034570"; transcript_id "EDP52293"; exon_number "1"; gene_source "ena"; gene_biotype "protein_coding"; transcript_source "ena"; transcript_biotype "protein_coding";	46	3
DS499596	199009	199010	DS499596	199063	199066	AFUB_034650	.	+	ena	start_codon	0	gene_id "AFUB_034650"; transcript_id "EDP52301"; exon_number "1"; gene_source "ena"; gene_biotype "protein_coding"; transcript_source "ena"; transcript_biotype "protein_coding";	54	3
DS499596	201729	201730	DS499596	201538	201868	AFUB_034660	.	+	ena	CDS	0	gene_id "AFUB_034660"; transcript_id "EDP52302"; exon_number "1"; gene_source "ena"; gene_biotype "protein_coding"; transcript_source "ena"; transcript_biotype "protein_coding"; protein_id "EDP52302";	0	3
DS499596	208279	208280	DS499596	208347	208350	AFUB_034680	.	+	ena	start_codon	0	gene_id "AFUB_034680"; transcript_id "EDP52304"; exon_number "1"; gene_source "ena"; gene_biotype "protein_coding"; transcript_source "ena"; transcript_biotype "protein_coding";	68	3
DS499596	209485	209486	DS499596	209609	209612	AFUB_034690	.	+	ena	start_codon	0	gene_id "AFUB_034690"; transcript_id "EDP52305"; exon_number "1"; gene_source "ena"; gene_biotype "protein_coding"; transcript_source "ena"; transcript_biotype "protein_coding";	124	3
DS499596	218622	218623	DS499596	218370	219869	AFUB_034740	.	+	ena	CDS	0	gene_id "AFUB_034740"; transcript_id "EDP52310"; exon_number "1"; gene_source "ena"; gene_biotype "protein_coding"; transcript_source "ena"; transcript_biotype "protein_coding"; protein_id "EDP52310";	0	3
DS499596	220667	220668	DS499596	220264	221483	AFUB_034750	.	+	ena	gene	.	gene_id "AFUB_034750"; gene_source "ena"; gene_biotype "protein_coding";	0	3
DS499596	223258	223259	DS499596	223320	223323	AFUB_034770	.	+	ena	start_codon	0	gene_id "AFUB_034770"; transcript_id "EDP52313"; exon_number "1"; gene_source "ena"; gene_biotype "protein_coding"; transcript_source "ena"; transcript_biotype "protein_coding";	62	3
DS499596	225399	225400	DS499596	225495	225498	AFUB_034790	.	+	ena	start_codon	0	gene_id "AFUB_034790"; transcript_id "EDP52315"; exon_number "1"; gene_source "ena"; gene_biotype "protein_coding"; transcript_source "ena"; transcript_biotype "protein_coding";	96	3
DS499596	236462	236463	DS499596	237080	237083	AFUB_034820	.	+	ena	start_codon	0	gene_id "AFUB_034820"; transcript_id "EDP52318"; exon_number "1"; gene_source "ena"; gene_biotype "protein_coding"; transcript_source "ena"; transcript_biotype "protein_coding";	618	3
DS499596	254054	254055	DS499596	254704	254707	AFUB_034890	.	+	ena	start_codon	0	gene_id "AFUB_034890"; transcript_id "EDP52325"; exon_number "1"; gene_source "ena"; gene_biotype "protein_coding"; transcript_source "ena"; transcript_biotype "protein_coding";	650	3
DS499596	254058	254059	DS499596	254704	254707	AFUB_034890	.	+	ena	start_codon	0	gene_id "AFUB_034890"; transcript_id "EDP52325"; exon_number "1"; gene_source "ena"; gene_biotype "protein_coding"; transcript_source "ena"; transcript_biotype "protein_coding";	646	3
DS499596	261908	261909	DS499596	262906	262909	AFUB_034920	.	+	ena	start_codon	0	gene_id "AFUB_034920"; transcript_id "EDP52328"; exon_number "1"; gene_source "ena"; gene_biotype "protein_coding"; transcript_source "ena"; transcript_biotype "protein_coding";	998	3
DS499596	292259	292260	DS499596	292333	292336	AFUB_035050	.	+	ena	start_codon	0	gene_id "AFUB_035050"; transcript_id "EDP52341"; exon_number "1"; gene_source "ena"; gene_biotype "protein_coding"; transcript_source "ena"; transcript_biotype "protein_coding";	74	3
DS499596	303804	303805	DS499596	303948	303951	AFUB_035090	.	+	ena	start_codon	0	gene_id "AFUB_035090"; transcript_id "EDP52345"; exon_number "1"; gene_source "ena"; gene_biotype "protein_coding"; transcript_source "ena"; transcript_biotype "protein_coding";	144	3
DS499596	322122	322123	DS499596	322193	322196	AFUB_035150	.	+	ena	start_codon	0	gene_id "AFUB_035150"; transcript_id "EDP52352"; exon_number "1"; gene_source "ena"; gene_biotype "protein_coding"; transcript_source "ena"; transcript_biotype "protein_coding";	71	3
DS499596	331328	331329	DS499596	331366	331369	AFUB_035180	.	+	ena	start_codon	0	gene_id "AFUB_035180"; transcript_id "EDP52355"; exon_number "1"; gene_source "ena"; gene_biotype "protein_coding"; transcript_source "ena"; transcript_biotype "protein_coding";	38	3
DS499596	341756	341757	DS499596	341829	341832	AFUB_035210	.	+	ena	start_codon	0	gene_id "AFUB_035210"; transcript_id "EDP52358"; exon_number "1"; gene_source "ena"; gene_biotype "protein_coding"; transcript_source "ena"; transcript_biotype "protein_coding";	73	3
DS499596	349430	349431	DS499596	349824	349827	AFUB_035240	.	+	ena	start_codon	0	gene_id "AFUB_035240"; transcript_id "EDP52361"; exon_number "1"; gene_source "ena"; gene_biotype "protein_coding"; transcript_source "ena"; transcript_biotype "protein_coding";	394	3
DS499596	353859	353860	DS499596	354350	354353	AFUB_035250	.	+	ena	start_codon	0	gene_id "AFUB_035250"; transcript_id "EDP52362"; exon_number "1"; gene_source "ena"; gene_biotype "protein_coding"; transcript_source "ena"; transcript_biotype "protein_coding";	491	3
DS499596	372682	372683	DS499596	372730	372733	AFUB_035290	.	+	ena	start_codon	0	gene_id "AFUB_035290"; transcript_id "EDP52366"; exon_number "1"; gene_source "ena"; gene_biotype "protein_coding"; transcript_source "ena"; transcript_biotype "protein_coding";	48	3
DS499596	372693	372694	DS499596	372730	372733	AFUB_035290	.	+	ena	start_codon	0	gene_id "AFUB_035290"; transcript_id "EDP52366"; exon_number "1"; gene_source "ena"; gene_biotype "protein_coding"; transcript_source "ena"; transcript_biotype "protein_coding";	37	3
DS499596	403521	403522	DS499596	403770	403773	AFUB_035340	.	+	ena	start_codon	0	gene_id "AFUB_035340"; transcript_id "EDP52371"; exon_number "1"; gene_source "ena"; gene_biotype "protein_coding"; transcript_source "ena"; transcript_biotype "protein_coding";	249	3
DS499596	410179	410180	DS499596	410275	410278	AFUB_035370	.	+	ena	start_codon	0	gene_id "AFUB_035370"; transcript_id "EDP52374"; exon_number "1"; gene_source "ena"; gene_biotype "protein_coding"; transcript_source "ena"; transcript_biotype "protein_coding";	96	3
DS499596	422278	422279	DS499596	422375	422378	AFUB_035420	.	+	ena	start_codon	0	gene_id "AFUB_035420"; transcript_id "EDP52379"; exon_number "1"; gene_source "ena"; gene_biotype "protein_coding"; transcript_source "ena"; transcript_biotype "protein_coding";	97	3
DS499596	464007	464008	DS499596	464087	464090	AFUB_035570	.	+	ena	start_codon	0	gene_id "AFUB_035570"; transcript_id "EDP52394"; exon_number "1"; gene_source "ena"; gene_biotype "protein_coding"; transcript_source "ena"; transcript_biotype "protein_coding";	80	3
DS499596	497428	497429	DS499596	497802	497805	AFUB_035730	.	+	ena	start_codon	0	gene_id "AFUB_035730"; transcript_id "EDP52408"; exon_number "1"; gene_source "ena"; gene_biotype "protein_coding"; transcript_source "ena"; transcript_biotype "protein_coding";	374	3
DS499596	507140	507141	DS499596	507334	507337	AFUB_035770	.	+	ena	start_codon	0	gene_id "AFUB_035770"; transcript_id "EDP52411"; exon_number "1"; gene_source "ena"; gene_biotype "protein_coding"; transcript_source "ena"; transcript_biotype "protein_coding";	194	3
DS499596	508912	508913	DS499596	508675	510118	AFUB_035780	.	+	ena	gene	.	gene_id "AFUB_035780"; gene_source "ena"; gene_biotype "protein_coding";	0	3
DS499596	517006	517007	DS499596	517040	517043	AFUB_035820	.	+	ena	start_codon	0	gene_id "AFUB_035820"; transcript_id "EDP52416"; exon_number "1"; gene_source "ena"; gene_biotype "protein_coding"; transcript_source "ena"; transcript_biotype "protein_coding";	34	3
DS499596	522916	522917	DS499596	523254	523257	AFUB_035850	.	+	ena	start_codon	0	gene_id "AFUB_035850"; transcript_id "EDP52419"; exon_number "1"; gene_source "ena"; gene_biotype "protein_coding"; transcript_source "ena"; transcript_biotype "protein_coding";	338	3
DS499596	529103	529104	DS499596	529156	529159	AFUB_035890	.	+	ena	start_codon	0	gene_id "AFUB_035890"; transcript_id "EDP52423"; exon_number "1"; gene_source "ena"; gene_biotype "protein_coding"; transcript_source "ena"; transcript_biotype "protein_coding";	53	3
DS499596	529106	529107	DS499596	529156	529159	AFUB_035890	.	+	ena	start_codon	0	gene_id "AFUB_035890"; transcript_id "EDP52423"; exon_number "1"; gene_source "ena"; gene_biotype "protein_coding"; transcript_source "ena"; transcript_biotype "protein_coding";	50	3
DS499596	530660	530661	DS499596	531073	531076	AFUB_035900	.	+	ena	start_codon	0	gene_id "AFUB_035900"; transcript_id "EDP52424"; exon_number "1"; gene_source "ena"; gene_biotype "protein_coding"; transcript_source "ena"; transcript_biotype "protein_coding";	413	3
DS499596	544247	544248	DS499596	544467	544470	AFUB_035950	.	+	ena	start_codon	0	gene_id "AFUB_035950"; transcript_id "EDP52429"; exon_number "1"; gene_source "ena"; gene_biotype "protein_coding"; transcript_source "ena"; transcript_biotype "protein_coding";	220	3
DS499596	553632	553633	DS499596	553701	553704	AFUB_035980	.	+	ena	start_codon	0	gene_id "AFUB_035980"; transcript_id "EDP52432"; exon_number "1"; gene_source "ena"; gene_biotype "protein_coding"; transcript_source "ena"; transcript_biotype "protein_coding";	69	3
DS499596	573830	573831	DS499596	573677	573853	AFUB_036060	.	+	ena	CDS	0	gene_id "AFUB_036060"; transcript_id "EDP52440"; exon_number "1"; gene_source "ena"; gene_biotype "protein_coding"; transcript_source "ena"; transcript_biotype "protein_coding"; protein_id "EDP52440";	0	3
DS499596	591862	591863	DS499596	592178	592181	AFUB_036120	.	+	ena	start_codon	0	gene_id "AFUB_036120"; transcript_id "EDP52446"; exon_number "1"; gene_source "ena"; gene_biotype "protein_coding"; transcript_source "ena"; transcript_biotype "protein_coding";	316	3
DS499596	607016	607017	DS499596	607049	607052	AFUB_036190	.	+	ena	start_codon	0	gene_id "AFUB_036190"; transcript_id "EDP52453"; exon_number "1"; gene_source "ena"; gene_biotype "protein_coding"; transcript_source "ena"; transcript_biotype "protein_coding";	33	3
DS499596	620792	620793	DS499596	620856	620859	AFUB_036250	.	+	ena	start_codon	0	gene_id "AFUB_036250"; transcript_id "EDP52459"; exon_number "1"; gene_source "ena"; gene_biotype "protein_coding"; transcript_source "ena"; transcript_biotype "protein_coding";	64	3
DS499596	636861	636862	DS499596	637542	637545	AFUB_036300	.	+	ena	start_codon	0	gene_id "AFUB_036300"; transcript_id "EDP52464"; exon_number "1"; gene_source "ena"; gene_biotype "protein_coding"; transcript_source "ena"; transcript_biotype "protein_coding";	681	3
DS499596	637074	637075	DS499596	637542	637545	AFUB_036300	.	+	ena	start_codon	0	gene_id "AFUB_036300"; transcript_id "EDP52464"; exon_number "1"; gene_source "ena"; gene_biotype "protein_coding"; transcript_source "ena"; transcript_biotype "protein_coding";	468	3
DS499596	649852	649853	DS499596	649904	649907	AFUB_036350	.	+	ena	start_codon	0	gene_id "AFUB_036350"; transcript_id "EDP52469"; exon_number "1"; gene_source "ena"; gene_biotype "protein_coding"; transcript_source "ena"; transcript_biotype "protein_coding";	52	3
DS499596	659439	659440	DS499596	659610	659613	AFUB_036370	.	+	ena	start_codon	0	gene_id "AFUB_036370"; transcript_id "EDP52471"; exon_number "1"; gene_source "ena"; gene_biotype "protein_coding"; transcript_source "ena"; transcript_biotype "protein_coding";	171	3
DS499596	694432	694433	DS499596	694741	694744	AFUB_036480	.	+	ena	start_codon	0	gene_id "AFUB_036480"; transcript_id "EDP52482"; exon_number "1"; gene_source "ena"; gene_biotype "protein_coding"; transcript_source "ena"; transcript_biotype "protein_coding";	309	3
DS499596	694610	694611	DS499596	694741	694744	AFUB_036480	.	+	ena	start_codon	0	gene_id "AFUB_036480"; transcript_id "EDP52482"; exon_number "1"; gene_source "ena"; gene_biotype "protein_coding"; transcript_source "ena"; transcript_biotype "protein_coding";	131	3
DS499596	710549	710550	DS499596	711214	711217	AFUB_036500	.	+	ena	start_codon	0	gene_id "AFUB_036500"; transcript_id "EDP52484"; exon_number "1"; gene_source "ena"; gene_biotype "protein_coding"; transcript_source "ena"; transcript_biotype "protein_coding";	665	3
DS499596	737771	737772	DS499596	737898	737901	AFUB_036620	.	+	ena	start_codon	0	gene_id "AFUB_036620"; transcript_id "EDP52496"; exon_number "1"; gene_source "ena"; gene_biotype "protein_coding"; transcript_source "ena"; transcript_biotype "protein_coding";	127	3
DS499596	762066	762067	DS499596	762278	762281	AFUB_036650	.	+	ena	start_codon	0	gene_id "AFUB_036650"; transcript_id "EDP52499"; exon_number "1"; gene_source "ena"; gene_biotype "protein_coding"; transcript_source "ena"; transcript_biotype "protein_coding";	212	3
DS499596	807389	807390	DS499596	807352	807794	AFUB_036780	.	+	ena	CDS	0	gene_id "AFUB_036780"; transcript_id "EDP52512"; exon_number "1"; gene_source "ena"; gene_biotype "protein_coding"; transcript_source "ena"; transcript_biotype "protein_coding"; protein_id "EDP52512";	0	3
DS499596	813763	813764	DS499596	813886	813889	AFUB_036810	.	+	ena	start_codon	0	gene_id "AFUB_036810"; transcript_id "EDP52515"; exon_number "1"; gene_source "ena"; gene_biotype "protein_coding"; transcript_source "ena"; transcript_biotype "protein_coding";	123	3
DS499596	828430	828431	DS499596	828956	828959	AFUB_036870	.	+	ena	start_codon	0	gene_id "AFUB_036870"; transcript_id "EDP52521"; exon_number "1"; gene_source "ena"; gene_biotype "protein_coding"; transcript_source "ena"; transcript_biotype "protein_coding";	526	3
DS499596	831305	831306	DS499596	831376	831379	AFUB_036890	.	+	ena	start_codon	0	gene_id "AFUB_036890"; transcript_id "EDP52523"; exon_number "1"; gene_source "ena"; gene_biotype "protein_coding"; transcript_source "ena"; transcript_biotype "protein_coding";	71	3
DS499596	861271	861272	DS499596	861487	861490	AFUB_036990	.	+	ena	start_codon	0	gene_id "AFUB_036990"; transcript_id "EDP52533"; exon_number "1"; gene_source "ena"; gene_biotype "protein_coding"; transcript_source "ena"; transcript_biotype "protein_coding";	216	3
DS499596	888757	888758	DS499596	888823	888826	AFUB_037070	.	+	ena	start_codon	0	gene_id "AFUB_037070"; transcript_id "EDP52541"; exon_number "1"; gene_source "ena"; gene_biotype "protein_coding"; transcript_source "ena"; transcript_biotype "protein_coding";	66	3
DS499596	892711	892712	DS499596	893492	893495	AFUB_037100	.	+	ena	start_codon	0	gene_id "AFUB_037100"; transcript_id "EDP52544"; exon_number "1"; gene_source "ena"; gene_biotype "protein_coding"; transcript_source "ena"; transcript_biotype "protein_coding";	781	3
DS499596	905785	905786	DS499596	907030	907033	AFUB_037160	.	+	ena	start_codon	0	gene_id "AFUB_037160"; transcript_id "EDP52550"; exon_number "1"; gene_source "ena"; gene_biotype "protein_coding"; transcript_source "ena"; transcript_biotype "protein_coding";	1245	3
DS499596	919352	919353	DS499596	919742	919745	AFUB_037210	.	+	ena	start_codon	0	gene_id "AFUB_037210"; transcript_id "EDP52555"; exon_number "1"; gene_source "ena"; gene_biotype "protein_coding"; transcript_source "ena"; transcript_biotype "protein_coding";	390	3
DS499596	935885	935886	DS499596	936074	936077	AFUB_037270	.	+	ena	start_codon	0	gene_id "AFUB_037270"; transcript_id "EDP52561"; exon_number "1"; gene_source "ena"; gene_biotype "protein_coding"; transcript_source "ena"; transcript_biotype "protein_coding";	189	3
DS499596	937970	937971	DS499596	938054	938057	AFUB_037280	.	+	ena	start_codon	0	gene_id "AFUB_037280"; transcript_id "EDP52562"; exon_number "1"; gene_source "ena"; gene_biotype "protein_coding"; transcript_source "ena"; transcript_biotype "protein_coding";	84	3
DS499596	946475	946476	DS499596	947067	947070	AFUB_037320	.	+	ena	start_codon	0	gene_id "AFUB_037320"; transcript_id "EDP52566"; exon_number "1"; gene_source "ena"; gene_biotype "protein_coding"; transcript_source "ena"; transcript_biotype "protein_coding";	592	3
DS499596	999319	999320	DS499596	999673	999676	AFUB_037500	.	+	ena	start_codon	0	gene_id "AFUB_037500"; transcript_id "EDP52584"; exon_number "1"; gene_source "ena"; gene_biotype "protein_coding"; transcript_source "ena"; transcript_biotype "protein_coding";	354	3
DS499596	999614	999615	DS499596	999673	999676	AFUB_037500	.	+	ena	start_codon	0	gene_id "AFUB_037500"; transcript_id "EDP52584"; exon_number "1"; gene_source "ena"; gene_biotype "protein_coding"; transcript_source "ena"; transcript_biotype "protein_coding";	59	3
DS499596	1003055	1003056	DS499596	1003225	1003228	AFUB_037510	.	+	ena	start_codon	0	gene_id "AFUB_037510"; transcript_id "EDP52585"; exon_number "1"; gene_source "ena"; gene_biotype "protein_coding"; transcript_source "ena"; transcript_biotype "protein_coding";	170	3
DS499596	1033026	1033027	DS499596	1033136	1033139	AFUB_037620	.	+	ena	start_codon	0	gene_id "AFUB_037620"; transcript_id "EDP52596"; exon_number "1"; gene_source "ena"; gene_biotype "protein_coding"; transcript_source "ena"; transcript_biotype "protein_coding";	110	3
DS499596	1035010	1035011	DS499596	1035114	1035117	AFUB_037640	.	+	ena	start_codon	0	gene_id "AFUB_037640"; transcript_id "EDP52598"; exon_number "1"; gene_source "ena"; gene_biotype "protein_coding"; transcript_source "ena"; transcript_biotype "protein_coding";	104	3
DS499596	1046959	1046960	DS499596	1047172	1047175	AFUB_037670	.	+	ena	start_codon	0	gene_id "AFUB_037670"; transcript_id "EDP52601"; exon_number "1"; gene_source "ena"; gene_biotype "protein_coding"; transcript_source "ena"; transcript_biotype "protein_coding";	213	3
DS499596	1060531	1060532	DS499596	1060950	1060953	AFUB_037710	.	+	ena	start_codon	0	gene_id "AFUB_037710"; transcript_id "EDP52605"; exon_number "1"; gene_source "ena"; gene_biotype "protein_coding"; transcript_source "ena"; transcript_biotype "protein_coding";	419	3
DS499596	1089307	1089308	DS499596	1089421	1089424	AFUB_037810	.	+	ena	start_codon	0	gene_id "AFUB_037810"; transcript_id "EDP52615"; exon_number "1"; gene_source "ena"; gene_biotype "protein_coding"; transcript_source "ena"; transcript_biotype "protein_coding";	114	3
DS499596	1100624	1100625	DS499596	1100974	1100977	AFUB_037850	.	+	ena	start_codon	0	gene_id "AFUB_037850"; transcript_id "EDP52619"; exon_number "1"; gene_source "ena"; gene_biotype "protein_coding"; transcript_source "ena"; transcript_biotype "protein_coding";	350	3
DS499596	1109550	1109551	DS499596	1109750	1109753	AFUB_037880	.	+	ena	start_codon	0	gene_id "AFUB_037880"; transcript_id "EDP52622"; exon_number "1"; gene_source "ena"; gene_biotype "protein_coding"; transcript_source "ena"; transcript_biotype "protein_coding";	200	3
DS499596	1115158	1115159	DS499596	1115415	1115418	AFUB_037900	.	+	ena	start_codon	0	gene_id "AFUB_037900"; transcript_id "EDP52624"; exon_number "1"; gene_source "ena"; gene_biotype "protein_coding"; transcript_source "ena"; transcript_biotype "protein_coding";	257	3
DS499596	1180833	1180834	DS499596	1181232	1181235	AFUB_038080	.	+	ena	start_codon	0	gene_id "AFUB_038080"; transcript_id "EDP52642"; exon_number "1"; gene_source "ena"; gene_biotype "protein_coding"; transcript_source "ena"; transcript_biotype "protein_coding";	399	3
DS499596	1191757	1191758	DS499596	1192025	1192028	AFUB_038120	.	+	ena	start_codon	0	gene_id "AFUB_038120"; transcript_id "EDP52646"; exon_number "1"; gene_source "ena"; gene_biotype "protein_coding"; transcript_source "ena"; transcript_biotype "protein_coding";	268	3
DS499596	1213395	1213396	DS499596	1213665	1213668	AFUB_038170	.	+	ena	start_codon	0	gene_id "AFUB_038170"; transcript_id "EDP52651"; exon_number "1"; gene_source "ena"; gene_biotype "protein_coding"; transcript_source "ena"; transcript_biotype "protein_coding";	270	3
DS499596	1216697	1216698	DS499596	1216910	1216913	AFUB_038180	.	+	ena	start_codon	0	gene_id "AFUB_038180"; transcript_id "EDP52652"; exon_number "1"; gene_source "ena"; gene_biotype "protein_coding"; transcript_source "ena"; transcript_biotype "protein_coding";	213	3
DS499596	1226651	1226652	DS499596	1226835	1226838	AFUB_038210	.	+	ena	start_codon	0	gene_id "AFUB_038210"; transcript_id "EDP52655"; exon_number "1"; gene_source "ena"; gene_biotype "protein_coding"; transcript_source "ena"; transcript_biotype "protein_coding";	184	3
DS499596	1226657	1226658	DS499596	1226835	1226838	AFUB_038210	.	+	ena	start_codon	0	gene_id "AFUB_038210"; transcript_id "EDP52655"; exon_number "1"; gene_source "ena"; gene_biotype "protein_coding"; transcript_source "ena"; transcript_biotype "protein_coding";	178	3
DS499596	1264683	1264684	DS499596	1265034	1265037	AFUB_038340	.	+	ena	start_codon	0	gene_id "AFUB_038340"; transcript_id "EDP52668"; exon_number "1"; gene_source "ena"; gene_biotype "protein_coding"; transcript_source "ena"; transcript_biotype "protein_coding";	351	3
DS499596	1267174	1267175	DS499596	1267112	1267575	AFUB_038350	.	+	ena	CDS	0	gene_id "AFUB_038350"; transcript_id "EDP52669"; exon_number "1"; gene_source "ena"; gene_biotype "protein_coding"; transcript_source "ena"; transcript_biotype "protein_coding"; protein_id "EDP52669";	0	3
DS499596	1274281	1274282	DS499596	1274118	1274714	AFUB_038380	.	+	ena	CDS	0	gene_id "AFUB_038380"; transcript_id "EDP52672"; exon_number "1"; gene_source "ena"; gene_biotype "protein_coding"; transcript_source "ena"; transcript_biotype "protein_coding"; protein_id "EDP52672";	0	3
DS499596	1287613	1287614	DS499596	1287916	1287919	AFUB_038420	.	+	ena	start_codon	0	gene_id "AFUB_038420"; transcript_id "EDP52673"; exon_number "1"; gene_source "ena"; gene_biotype "protein_coding"; transcript_source "ena"; transcript_biotype "protein_coding";	303	3
DS499596	1287638	1287639	DS499596	1287916	1287919	AFUB_038420	.	+	ena	start_codon	0	gene_id "AFUB_038420"; transcript_id "EDP52673"; exon_number "1"; gene_source "ena"; gene_biotype "protein_coding"; transcript_source "ena"; transcript_biotype "protein_coding";	278	3
DS499596	1289536	1289537	DS499596	1289611	1289614	AFUB_038430	.	+	ena	start_codon	0	gene_id "AFUB_038430"; transcript_id "EDP52674"; exon_number "1"; gene_source "ena"; gene_biotype "protein_coding"; transcript_source "ena"; transcript_biotype "protein_coding";	75	3
DS499596	1323854	1323855	DS499596	1323727	1324993	AFUB_038540	.	+	ena	CDS	0	gene_id "AFUB_038540"; transcript_id "EDP52685"; exon_number "1"; gene_source "ena"; gene_biotype "protein_coding"; transcript_source "ena"; transcript_biotype "protein_coding"; protein_id "EDP52685";	0	3
DS499596	1333622	1333623	DS499596	1334790	1334793	AFUB_038570	.	+	ena	start_codon	0	gene_id "AFUB_038570"; transcript_id "EDP52688"; exon_number "1"; gene_source "ena"; gene_biotype "protein_coding"; transcript_source "ena"; transcript_biotype "protein_coding";	1168	3
DS499596	1351787	1351788	DS499596	1351879	1351882	AFUB_038650	.	+	ena	start_codon	0	gene_id "AFUB_038650"; transcript_id "EDP52696"; exon_number "1"; gene_source "ena"; gene_biotype "protein_coding"; transcript_source "ena"; transcript_biotype "protein_coding";	92	3
DS499596	1355573	1355574	DS499596	1355830	1355833	AFUB_038670	.	+	ena	start_codon	0	gene_id "AFUB_038670"; transcript_id "EDP52698"; exon_number "1"; gene_source "ena"; gene_biotype "protein_coding"; transcript_source "ena"; transcript_biotype "protein_coding";	257	3
DS499596	1368294	1368295	DS499596	1368579	1368582	AFUB_038730	.	+	ena	start_codon	0	gene_id "AFUB_038730"; transcript_id "EDP52704"; exon_number "1"; gene_source "ena"; gene_biotype "protein_coding"; transcript_source "ena"; transcript_biotype "protein_coding";	285	3
DS499596	1372583	1372584	DS499596	1372696	1372699	AFUB_038750	.	+	ena	start_codon	0	gene_id "AFUB_038750"; transcript_id "EDP52706"; exon_number "1"; gene_source "ena"; gene_biotype "protein_coding"; transcript_source "ena"; transcript_biotype "protein_coding";	113	3
DS499596	1389851	1389852	DS499596	1390372	1390375	AFUB_038810	.	+	ena	start_codon	0	gene_id "AFUB_038810"; transcript_id "EDP52712"; exon_number "1"; gene_source "ena"; gene_biotype "protein_coding"; transcript_source "ena"; transcript_biotype "protein_coding";	521	3
DS499596	1412065	1412066	DS499596	1412106	1412109	AFUB_038900	.	+	ena	start_codon	0	gene_id "AFUB_038900"; transcript_id "EDP52721"; exon_number "1"; gene_source "ena"; gene_biotype "protein_coding"; transcript_source "ena"; transcript_biotype "protein_coding";	41	3
DS499596	1428842	1428843	DS499596	1428820	1428886	AFUB_038940	.	+	ena	CDS	0	gene_id "AFUB_038940"; transcript_id "EDP52725"; exon_number "1"; gene_source "ena"; gene_biotype "protein_coding"; transcript_source "ena"; transcript_biotype "protein_coding"; protein_id "EDP52725";	0	3
DS499596	1442112	1442113	DS499596	1442282	1442285	AFUB_039000	.	+	ena	start_codon	0	gene_id "AFUB_039000"; transcript_id "EDP52731"; exon_number "1"; gene_source "ena"; gene_biotype "protein_coding"; transcript_source "ena"; transcript_biotype "protein_coding";	170	3
DS499596	1456966	1456967	DS499596	1457070	1457073	AFUB_039040	.	+	ena	start_codon	0	gene_id "AFUB_039040"; transcript_id "EDP52735"; exon_number "1"; gene_source "ena"; gene_biotype "protein_coding"; transcript_source "ena"; transcript_biotype "protein_coding";	104	3
DS499596	1466196	1466197	DS499596	1466939	1466942	AFUB_039070	.	+	ena	start_codon	0	gene_id "AFUB_039070"; transcript_id "EDP52738"; exon_number "1"; gene_source "ena"; gene_biotype "protein_coding"; transcript_source "ena"; transcript_biotype "protein_coding";	743	3
DS499596	1505342	1505343	DS499596	1505596	1505599	AFUB_039190	.	+	ena	start_codon	0	gene_id "AFUB_039190"; transcript_id "EDP52750"; exon_number "1"; gene_source "ena"; gene_biotype "protein_coding"; transcript_source "ena"; transcript_biotype "protein_coding";	254	3
DS499596	1517476	1517477	DS499596	1517418	1518027	AFUB_039230	.	+	ena	CDS	0	gene_id "AFUB_039230"; transcript_id "EDP52754"; exon_number "1"; gene_source "ena"; gene_biotype "protein_coding"; transcript_source "ena"; transcript_biotype "protein_coding"; protein_id "EDP52754";	0	3
DS499596	1538957	1538958	DS499596	1538847	1538994	AFUB_039300	.	+	ena	CDS	0	gene_id "AFUB_039300"; transcript_id "EDP52761"; exon_number "1"; gene_source "ena"; gene_biotype "protein_coding"; transcript_source "ena"; transcript_biotype "protein_coding"; protein_id "EDP52761";	0	3
DS499596	1563694	1563695	DS499596	1563563	1564004	AFUB_039390	.	+	ena	CDS	0	gene_id "AFUB_039390"; transcript_id "EDP52770"; exon_number "1"; gene_source "ena"; gene_biotype "protein_coding"; transcript_source "ena"; transcript_biotype "protein_coding"; protein_id "EDP52770";	0	3
DS499596	1571507	1571508	DS499596	1571690	1571693	AFUB_039430	.	+	ena	start_codon	0	gene_id "AFUB_039430"; transcript_id "EDP52774"; exon_number "1"; gene_source "ena"; gene_biotype "protein_coding"; transcript_source "ena"; transcript_biotype "protein_coding";	183	3
DS499596	1581041	1581042	DS499596	1581236	1581239	AFUB_039450	.	+	ena	start_codon	0	gene_id "AFUB_039450"; transcript_id "EDP52776"; exon_number "1"; gene_source "ena"; gene_biotype "protein_coding"; transcript_source "ena"; transcript_biotype "protein_coding";	195	3
DS499596	1586682	1586683	DS499596	1586815	1586818	AFUB_039470	.	+	ena	start_codon	0	gene_id "AFUB_039470"; transcript_id "EDP52778"; exon_number "1"; gene_source "ena"; gene_biotype "protein_coding"; transcript_source "ena"; transcript_biotype "protein_coding";	133	3
DS499596	1592068	1592069	DS499596	1592271	1592274	AFUB_039480	.	+	ena	start_codon	0	gene_id "AFUB_039480"; transcript_id "EDP52779"; exon_number "1"; gene_source "ena"; gene_biotype "protein_coding"; transcript_source "ena"; transcript_biotype "protein_coding";	203	3
DS499596	1592071	1592072	DS499596	1592271	1592274	AFUB_039480	.	+	ena	start_codon	0	gene_id "AFUB_039480"; transcript_id "EDP52779"; exon_number "1"; gene_source "ena"; gene_biotype "protein_coding"; transcript_source "ena"; transcript_biotype "protein_coding";	200	3
DS499596	1628528	1628529	DS499596	1628612	1628615	AFUB_039580	.	+	ena	start_codon	0	gene_id "AFUB_039580"; transcript_id "EDP52789"; exon_number "1"; gene_source "ena"; gene_biotype "protein_coding"; transcript_source "ena"; transcript_biotype "protein_coding";	84	3
DS499596	1640602	1640603	DS499596	1641081	1641084	AFUB_039620	.	+	ena	start_codon	0	gene_id "AFUB_039620"; transcript_id "EDP52793"; exon_number "1"; gene_source "ena"; gene_biotype "protein_coding"; transcript_source "ena"; transcript_biotype "protein_coding";	479	3
DS499596	1673448	1673449	DS499596	1673758	1673761	AFUB_039740	.	+	ena	start_codon	0	gene_id "AFUB_039740"; transcript_id "EDP52805"; exon_number "1"; gene_source "ena"; gene_biotype "protein_coding"; transcript_source "ena"; transcript_biotype "protein_coding";	310	3
DS499596	1684422	1684423	DS499596	1684507	1684510	AFUB_039780	.	+	ena	start_codon	0	gene_id "AFUB_039780"; transcript_id "EDP52809"; exon_number "1"; gene_source "ena"; gene_biotype "protein_coding"; transcript_source "ena"; transcript_biotype "protein_coding";	85	3
DS499596	1687221	1687222	DS499596	1687438	1687441	AFUB_039800	.	+	ena	start_codon	0	gene_id "AFUB_039800"; transcript_id "EDP52811"; exon_number "1"; gene_source "ena"; gene_biotype "protein_coding"; transcript_source "ena"; transcript_biotype "protein_coding";	217	3
DS499596	1693601	1693602	DS499596	1693736	1693739	AFUB_039830	.	+	ena	start_codon	0	gene_id "AFUB_039830"; transcript_id "EDP52814"; exon_number "1"; gene_source "ena"; gene_biotype "protein_coding"; transcript_source "ena"; transcript_biotype "protein_coding";	135	3
DS499596	1702035	1702036	DS499596	1702364	1702367	AFUB_039870	.	+	ena	start_codon	0	gene_id "AFUB_039870"; transcript_id "EDP52818"; exon_number "1"; gene_source "ena"; gene_biotype "protein_coding"; transcript_source "ena"; transcript_biotype "protein_coding";	329	3
DS499596	1735032	1735033	DS499596	1735137	1735140	AFUB_040050	.	+	ena	start_codon	0	gene_id "AFUB_040050"; transcript_id "EDP52834"; exon_number "1"; gene_source "ena"; gene_biotype "protein_coding"; transcript_source "ena"; transcript_biotype "protein_coding";	105	3
DS499596	1747401	1747402	DS499596	1747473	1747476	AFUB_040100	.	+	ena	start_codon	0	gene_id "AFUB_040100"; transcript_id "EDP52839"; exon_number "1"; gene_source "ena"; gene_biotype "protein_coding"; transcript_source "ena"; transcript_biotype "protein_coding";	72	3
DS499596	1773664	1773665	DS499596	1773877	1773880	AFUB_040200	.	+	ena	start_codon	0	gene_id "AFUB_040200"; transcript_id "EDP52849"; exon_number "1"; gene_source "ena"; gene_biotype "protein_coding"; transcript_source "ena"; transcript_biotype "protein_coding";	213	3
DS499596	1779547	1779548	DS499596	1779561	1779564	AFUB_040230	.	+	ena	start_codon	0	gene_id "AFUB_040230"; transcript_id "EDP52852"; exon_number "1"; gene_source "ena"; gene_biotype "protein_coding"; transcript_source "ena"; transcript_biotype "protein_coding";	14	3
DS499596	1809657	1809658	DS499596	1809609	1809805	AFUB_040350	.	+	ena	CDS	0	gene_id "AFUB_040350"; transcript_id "EDP52864"; exon_number "1"; gene_source "ena"; gene_biotype "protein_coding"; transcript_source "ena"; transcript_biotype "protein_coding"; protein_id "EDP52864";	0	3
DS499596	1837049	1837050	DS499596	1837186	1837189	AFUB_040450	.	+	ena	start_codon	0	gene_id "AFUB_040450"; transcript_id "EDP52874"; exon_number "1"; gene_source "ena"; gene_biotype "protein_coding"; transcript_source "ena"; transcript_biotype "protein_coding";	137	3
DS499596	1844954	1844955	DS499596	1845162	1845165	AFUB_040490	.	+	ena	start_codon	0	gene_id "AFUB_040490"; transcript_id "EDP52877"; exon_number "1"; gene_source "ena"; gene_biotype "protein_coding"; transcript_source "ena"; transcript_biotype "protein_coding";	208	3
DS499596	1848411	1848412	DS499596	1848564	1848567	AFUB_040510	.	+	ena	start_codon	0	gene_id "AFUB_040510"; transcript_id "EDP52879"; exon_number "1"; gene_source "ena"; gene_biotype "protein_coding"; transcript_source "ena"; transcript_biotype "protein_coding";	153	3
DS499596	1858381	1858382	DS499596	1858531	1858534	AFUB_040560	.	+	ena	start_codon	0	gene_id "AFUB_040560"; transcript_id "EDP52884"; exon_number "1"; gene_source "ena"; gene_biotype "protein_coding"; transcript_source "ena"; transcript_biotype "protein_coding";	150	3
DS499596	1881717	1881718	DS499596	1882137	1882140	AFUB_040630	.	+	ena	start_codon	0	gene_id "AFUB_040630"; transcript_id "EDP52891"; exon_number "1"; gene_source "ena"; gene_biotype "protein_coding"; transcript_source "ena"; transcript_biotype "protein_coding";	420	3
DS499596	1881972	1881973	DS499596	1882137	1882140	AFUB_040630	.	+	ena	start_codon	0	gene_id "AFUB_040630"; transcript_id "EDP52891"; exon_number "1"; gene_source "ena"; gene_biotype "protein_coding"; transcript_source "ena"; transcript_biotype "protein_coding";	165	3
DS499596	1885851	1885852	DS499596	1886665	1886668	AFUB_040640	.	+	ena	start_codon	0	gene_id "AFUB_040640"; transcript_id "EDP52892"; exon_number "1"; gene_source "ena"; gene_biotype "protein_coding"; transcript_source "ena"; transcript_biotype "protein_coding";	814	3
DS499596	1891998	1891999	DS499596	1892212	1892215	AFUB_040670	.	+	ena	start_codon	0	gene_id "AFUB_040670"; transcript_id "EDP52895"; exon_number "1"; gene_source "ena"; gene_biotype "protein_coding"; transcript_source "ena"; transcript_biotype "protein_coding";	214	3
DS499596	1901380	1901381	DS499596	1901179	1901680	AFUB_040710	.	+	ena	CDS	0	gene_id "AFUB_040710"; transcript_id "EDP52899"; exon_number "1"; gene_source "ena"; gene_biotype "protein_coding"; transcript_source "ena"; transcript_biotype "protein_coding"; protein_id "EDP52899";	0	3
DS499596	1907259	1907260	DS499596	1907805	1907808	AFUB_040770	.	+	ena	start_codon	0	gene_id "AFUB_040770"; transcript_id "EDP52904"; exon_number "1"; gene_source "ena"; gene_biotype "protein_coding"; transcript_source "ena"; transcript_biotype "protein_coding";	546	3
DS499596	1924021	1924022	DS499596	1924190	1924193	AFUB_040840	.	+	ena	start_codon	0	gene_id "AFUB_040840"; transcript_id "EDP52911"; exon_number "1"; gene_source "ena"; gene_biotype "protein_coding"; transcript_source "ena"; transcript_biotype "protein_coding";	169	3
DS499596	1925352	1925353	DS499596	1925506	1925509	AFUB_040850	.	+	ena	start_codon	0	gene_id "AFUB_040850"; transcript_id "EDP52912"; exon_number "1"; gene_source "ena"; gene_biotype "protein_coding"; transcript_source "ena"; transcript_biotype "protein_coding";	154	3
DS499596	1936182	1936183	DS499596	1936468	1936471	AFUB_040860	.	+	ena	start_codon	0	gene_id "AFUB_040860"; transcript_id "EDP52913"; exon_number "1"; gene_source "ena"; gene_biotype "protein_coding"; transcript_source "ena"; transcript_biotype "protein_coding";	286	3
DS499596	1948157	1948158	DS499596	1948539	1948542	AFUB_040900	.	+	ena	start_codon	0	gene_id "AFUB_040900"; transcript_id "EDP52917"; exon_number "1"; gene_source "ena"; gene_biotype "protein_coding"; transcript_source "ena"; transcript_biotype "protein_coding";	382	3
DS499596	1955635	1955636	DS499596	1955616	1955817	AFUB_040930	.	+	ena	CDS	0	gene_id "AFUB_040930"; transcript_id "EDP52920"; exon_number "1"; gene_source "ena"; gene_biotype "protein_coding"; transcript_source "ena"; transcript_biotype "protein_coding"; protein_id "EDP52920";	0	3
DS499596	1958712	1958713	DS499596	1958995	1958998	AFUB_040950	.	+	ena	start_codon	0	gene_id "AFUB_040950"; transcript_id "EDP52922"; exon_number "1"; gene_source "ena"; gene_biotype "protein_coding"; transcript_source "ena"; transcript_biotype "protein_coding";	283	3
DS499596	1963768	1963769	DS499596	1963791	1963794	AFUB_040980	.	+	ena	start_codon	0	gene_id "AFUB_040980"; transcript_id "EDP52925"; exon_number "1"; gene_source "ena"; gene_biotype "protein_coding"; transcript_source "ena"; transcript_biotype "protein_coding";	23	3
DS499596	2016729	2016730	DS499596	2016939	2016942	AFUB_041140	.	+	ena	start_codon	0	gene_id "AFUB_041140"; transcript_id "EDP52941"; exon_number "1"; gene_source "ena"; gene_biotype "protein_coding"; transcript_source "ena"; transcript_biotype "protein_coding";	210	3
DS499596	2018638	2018639	DS499596	2018715	2018718	AFUB_041150	.	+	ena	start_codon	0	gene_id "AFUB_041150"; transcript_id "EDP52942"; exon_number "1"; gene_source "ena"; gene_biotype "protein_coding"; transcript_source "ena"; transcript_biotype "protein_coding";	77	3
DS499596	2036243	2036244	DS499596	2036252	2036255	AFUB_041190	.	+	ena	start_codon	0	gene_id "AFUB_041190"; transcript_id "EDP52947"; exon_number "1"; gene_source "ena"; gene_biotype "protein_coding"; transcript_source "ena"; transcript_biotype "protein_coding";	9	3
DS499596	2048805	2048806	DS499596	2048906	2048909	AFUB_041220	.	+	ena	start_codon	0	gene_id "AFUB_041220"; transcript_id "EDP52950"; exon_number "1"; gene_source "ena"; gene_biotype "protein_coding"; transcript_source "ena"; transcript_biotype "protein_coding";	101	3
DS499596	2059900	2059901	DS499596	2059398	2069174	AFUB_041250	.	+	ena	gene	.	gene_id "AFUB_041250"; gene_source "ena"; gene_biotype "protein_coding";	0	3
DS499596	2076363	2076364	DS499596	2076515	2076518	AFUB_041290	.	+	ena	start_codon	0	gene_id "AFUB_041290"; transcript_id "EDP52957"; exon_number "1"; gene_source "ena"; gene_biotype "protein_coding"; transcript_source "ena"; transcript_biotype "protein_coding";	152	3
DS499596	2078608	2078609	DS499596	2078749	2078752	AFUB_041300	.	+	ena	start_codon	0	gene_id "AFUB_041300"; transcript_id "EDP52958"; exon_number "1"; gene_source "ena"; gene_biotype "protein_coding"; transcript_source "ena"; transcript_biotype "protein_coding";	141	3
DS499596	2096874	2096875	DS499596	2096668	2097284	AFUB_041370	.	+	ena	gene	.	gene_id "AFUB_041370"; gene_source "ena"; gene_biotype "protein_coding";	0	3
DS499596	2104298	2104299	DS499596	2104438	2104441	AFUB_041400	.	+	ena	start_codon	0	gene_id "AFUB_041400"; transcript_id "EDP52968"; exon_number "1"; gene_source "ena"; gene_biotype "protein_coding"; transcript_source "ena"; transcript_biotype "protein_coding";	140	3
DS499596	2107494	2107495	DS499596	2107658	2107661	AFUB_041420	.	+	ena	start_codon	0	gene_id "AFUB_041420"; transcript_id "EDP52970"; exon_number "1"; gene_source "ena"; gene_biotype "protein_coding"; transcript_source "ena"; transcript_biotype "protein_coding";	164	3
DS499596	2109543	2109544	DS499596	2110131	2110134	AFUB_041430	.	+	ena	start_codon	0	gene_id "AFUB_041430"; transcript_id "EDP52971"; exon_number "1"; gene_source "ena"; gene_biotype "protein_coding"; transcript_source "ena"; transcript_biotype "protein_coding";	588	3
DS499596	2133027	2133028	DS499596	2133121	2133124	AFUB_041490	.	+	ena	start_codon	0	gene_id "AFUB_041490"; transcript_id "EDP52977"; exon_number "1"; gene_source "ena"; gene_biotype "protein_coding"; transcript_source "ena"; transcript_biotype "protein_coding";	94	3
DS499596	2141644	2141645	DS499596	2141896	2141899	AFUB_041520	.	+	ena	start_codon	0	gene_id "AFUB_041520"; transcript_id "EDP52980"; exon_number "1"; gene_source "ena"; gene_biotype "protein_coding"; transcript_source "ena"; transcript_biotype "protein_coding";	252	3
DS499596	2181236	2181237	DS499596	2181291	2181294	AFUB_041650	.	+	ena	start_codon	0	gene_id "AFUB_041650"; transcript_id "EDP52994"; exon_number "1"; gene_source "ena"; gene_biotype "protein_coding"; transcript_source "ena"; transcript_biotype "protein_coding";	55	3
DS499596	2210863	2210864	DS499596	2210914	2210917	AFUB_041760	.	+	ena	start_codon	0	gene_id "AFUB_041760"; transcript_id "EDP53005"; exon_number "1"; gene_source "ena"; gene_biotype "protein_coding"; transcript_source "ena"; transcript_biotype "protein_coding";	51	3
DS499596	2231373	2231374	DS499596	2231901	2231904	AFUB_041830	.	+	ena	start_codon	0	gene_id "AFUB_041830"; transcript_id "EDP53012"; exon_number "1"; gene_source "ena"; gene_biotype "protein_coding"; transcript_source "ena"; transcript_biotype "protein_coding";	528	3
DS499596	2242018	2242019	DS499596	2242052	2242055	AFUB_041870	.	+	ena	start_codon	0	gene_id "AFUB_041870"; transcript_id "EDP53016"; exon_number "1"; gene_source "ena"; gene_biotype "protein_coding"; transcript_source "ena"; transcript_biotype "protein_coding";	34	3
DS499596	2252717	2252718	DS499596	2252760	2252763	AFUB_041900	.	+	ena	start_codon	0	gene_id "AFUB_041900"; transcript_id "EDP53019"; exon_number "1"; gene_source "ena"; gene_biotype "protein_coding"; transcript_source "ena"; transcript_biotype "protein_coding";	43	3
DS499596	2273698	2273699	DS499596	2273985	2273988	AFUB_041970	.	+	ena	start_codon	0	gene_id "AFUB_041970"; transcript_id "EDP53026"; exon_number "1"; gene_source "ena"; gene_biotype "protein_coding"; transcript_source "ena"; transcript_biotype "protein_coding";	287	3
DS499596	2276282	2276283	DS499596	2276890	2276893	AFUB_041980	.	+	ena	start_codon	0	gene_id "AFUB_041980"; transcript_id "EDP53027"; exon_number "1"; gene_source "ena"; gene_biotype "protein_coding"; transcript_source "ena"; transcript_biotype "protein_coding";	608	3
DS499596	2306236	2306237	DS499596	2306278	2306281	AFUB_042100	.	+	ena	start_codon	0	gene_id "AFUB_042100"; transcript_id "EDP53039"; exon_number "1"; gene_source "ena"; gene_biotype "protein_coding"; transcript_source "ena"; transcript_biotype "protein_coding";	42	3
DS499596	2328950	2328951	DS499596	2329770	2329773	AFUB_042160	.	+	ena	start_codon	0	gene_id "AFUB_042160"; transcript_id "EDP53045"; exon_number "1"; gene_source "ena"; gene_biotype "protein_coding"; transcript_source "ena"; transcript_biotype "protein_coding";	820	3
DS499596	2366564	2366565	DS499596	2366532	2368137	AFUB_042270	.	+	ena	CDS	0	gene_id "AFUB_042270"; transcript_id "EDP53056"; exon_number "1"; gene_source "ena"; gene_biotype "protein_coding"; transcript_source "ena"; transcript_biotype "protein_coding"; protein_id "EDP53056";	0	3
DS499596	2368648	2368649	DS499596	2368502	2369402	AFUB_042280	.	+	ena	gene	.	gene_id "AFUB_042280"; gene_source "ena"; gene_biotype "protein_coding";	0	3
DS499596	2402139	2402140	DS499596	2402243	2402246	AFUB_042410	.	+	ena	start_codon	0	gene_id "AFUB_042410"; transcript_id "EDP53070"; exon_number "1"; gene_source "ena"; gene_biotype "protein_coding"; transcript_source "ena"; transcript_biotype "protein_coding";	104	3
DS499596	2407982	2407983	DS499596	2408777	2408780	AFUB_042450	.	+	ena	start_codon	0	gene_id "AFUB_042450"; transcript_id "EDP53074"; exon_number "1"; gene_source "ena"; gene_biotype "protein_coding"; transcript_source "ena"; transcript_biotype "protein_coding";	795	3
DS499596	2410933	2410934	DS499596	2411073	2411076	AFUB_042460	.	+	ena	start_codon	0	gene_id "AFUB_042460"; transcript_id "EDP53075"; exon_number "1"; gene_source "ena"; gene_biotype "protein_coding"; transcript_source "ena"; transcript_biotype "protein_coding";	140	3
DS499596	2420239	2420240	DS499596	2420302	2420305	AFUB_042490	.	+	ena	start_codon	0	gene_id "AFUB_042490"; transcript_id "EDP53078"; exon_number "1"; gene_source "ena"; gene_biotype "protein_coding"; transcript_source "ena"; transcript_biotype "protein_coding";	63	3
DS499596	2424726	2424727	DS499596	2424897	2424900	AFUB_042510	.	+	ena	start_codon	0	gene_id "AFUB_042510"; transcript_id "EDP53080"; exon_number "1"; gene_source "ena"; gene_biotype "protein_coding"; transcript_source "ena"; transcript_biotype "protein_coding";	171	3
DS499596	2428078	2428079	DS499596	2428195	2428198	AFUB_042520	.	+	ena	start_codon	0	gene_id "AFUB_042520"; transcript_id "EDP53081"; exon_number "1"; gene_source "ena"; gene_biotype "protein_coding"; transcript_source "ena"; transcript_biotype "protein_coding";	117	3
DS499596	2430752	2430753	DS499596	2430785	2430788	AFUB_042530	.	+	ena	start_codon	0	gene_id "AFUB_042530"; transcript_id "EDP53082"; exon_number "1"; gene_source "ena"; gene_biotype "protein_coding"; transcript_source "ena"; transcript_biotype "protein_coding";	33	3
DS499596	2451232	2451233	DS499596	2451293	2451296	AFUB_042590	.	+	ena	start_codon	0	gene_id "AFUB_042590"; transcript_id "EDP53088"; exon_number "1"; gene_source "ena"; gene_biotype "protein_coding"; transcript_source "ena"; transcript_biotype "protein_coding";	61	3
DS499596	2456320	2456321	DS499596	2456422	2456425	AFUB_042610	.	+	ena	start_codon	0	gene_id "AFUB_042610"; transcript_id "EDP53090"; exon_number "1"; gene_source "ena"; gene_biotype "protein_coding"; transcript_source "ena"; transcript_biotype "protein_coding";	102	3
DS499596	2456361	2456362	DS499596	2456422	2456425	AFUB_042610	.	+	ena	start_codon	0	gene_id "AFUB_042610"; transcript_id "EDP53090"; exon_number "1"; gene_source "ena"; gene_biotype "protein_coding"; transcript_source "ena"; transcript_biotype "protein_coding";	61	3
DS499596	2474073	2474074	DS499596	2473937	2474425	AFUB_042690	.	+	ena	CDS	0	gene_id "AFUB_042690"; transcript_id "EDP53098"; exon_number "1"; gene_source "ena"; gene_biotype "protein_coding"; transcript_source "ena"; transcript_biotype "protein_coding"; protein_id "EDP53098";	0	3
DS499596	2477308	2477309	DS499596	2477361	2477364	AFUB_042720	.	+	ena	start_codon	0	gene_id "AFUB_042720"; transcript_id "EDP53101"; exon_number "1"; gene_source "ena"; gene_biotype "protein_coding"; transcript_source "ena"; transcript_biotype "protein_coding";	53	3
DS499596	2480607	2480608	DS499596	2480693	2480696	AFUB_042740	.	+	ena	start_codon	0	gene_id "AFUB_042740"; transcript_id "EDP53103"; exon_number "1"; gene_source "ena"; gene_biotype "protein_coding"; transcript_source "ena"; transcript_biotype "protein_coding";	86	3
DS499596	2511405	2511406	DS499596	2511516	2511519	AFUB_042840	.	+	ena	start_codon	0	gene_id "AFUB_042840"; transcript_id "EDP53114"; exon_number "1"; gene_source "ena"; gene_biotype "protein_coding"; transcript_source "ena"; transcript_biotype "protein_coding";	111	3
DS499596	2560493	2560494	DS499596	2560638	2560641	AFUB_043010	.	+	ena	start_codon	0	gene_id "AFUB_043010"; transcript_id "EDP53131"; exon_number "1"; gene_source "ena"; gene_biotype "protein_coding"; transcript_source "ena"; transcript_biotype "protein_coding";	145	3
DS499596	2562952	2562953	DS499596	2563215	2563218	AFUB_043020	.	+	ena	start_codon	0	gene_id "AFUB_043020"; transcript_id "EDP53132"; exon_number "1"; gene_source "ena"; gene_biotype "protein_coding"; transcript_source "ena"; transcript_biotype "protein_coding";	263	3
DS499596	2573848	2573849	DS499596	2574614	2574617	AFUB_043050	.	+	ena	start_codon	0	gene_id "AFUB_043050"; transcript_id "EDP53135"; exon_number "1"; gene_source "ena"; gene_biotype "protein_coding"; transcript_source "ena"; transcript_biotype "protein_coding";	766	3
DS499596	2576563	2576564	DS499596	2576626	2576629	AFUB_043060	.	+	ena	start_codon	0	gene_id "AFUB_043060"; transcript_id "EDP53136"; exon_number "1"; gene_source "ena"; gene_biotype "protein_coding"; transcript_source "ena"; transcript_biotype "protein_coding";	63	3
DS499596	2580667	2580668	DS499596	2581216	2581219	AFUB_043080	.	+	ena	start_codon	0	gene_id "AFUB_043080"; transcript_id "EDP53138"; exon_number "1"; gene_source "ena"; gene_biotype "protein_coding"; transcript_source "ena"; transcript_biotype "protein_coding";	549	3
DS499596	2608794	2608795	DS499596	2608957	2608960	AFUB_043150	.	+	ena	start_codon	0	gene_id "AFUB_043150"; transcript_id "EDP53145"; exon_number "1"; gene_source "ena"; gene_biotype "protein_coding"; transcript_source "ena"; transcript_biotype "protein_coding";	163	3
DS499596	2620090	2620091	DS499596	2620408	2620411	AFUB_043200	.	+	ena	start_codon	0	gene_id "AFUB_043200"; transcript_id "EDP53150"; exon_number "1"; gene_source "ena"; gene_biotype "protein_coding"; transcript_source "ena"; transcript_biotype "protein_coding";	318	3
DS499596	2629379	2629380	DS499596	2629451	2629454	AFUB_043240	.	+	ena	start_codon	0	gene_id "AFUB_043240"; transcript_id "EDP53154"; exon_number "1"; gene_source "ena"; gene_biotype "protein_coding"; transcript_source "ena"; transcript_biotype "protein_coding";	72	3
DS499596	2639183	2639184	DS499596	2639676	2639679	AFUB_043270	.	+	ena	start_codon	0	gene_id "AFUB_043270"; transcript_id "EDP53157"; exon_number "1"; gene_source "ena"; gene_biotype "protein_coding"; transcript_source "ena"; transcript_biotype "protein_coding";	493	3
DS499596	2649158	2649159	DS499596	2649336	2649339	AFUB_043290	.	+	ena	start_codon	0	gene_id "AFUB_043290"; transcript_id "EDP53159"; exon_number "1"; gene_source "ena"; gene_biotype "protein_coding"; transcript_source "ena"; transcript_biotype "protein_coding";	178	3
DS499596	2690476	2690477	DS499596	2691085	2691088	AFUB_043410	.	+	ena	start_codon	0	gene_id "AFUB_043410"; transcript_id "EDP53171"; exon_number "1"; gene_source "ena"; gene_biotype "protein_coding"; transcript_source "ena"; transcript_biotype "protein_coding";	609	3
DS499596	2696042	2696043	DS499596	2696189	2696192	AFUB_043430	.	+	ena	start_codon	0	gene_id "AFUB_043430"; transcript_id "EDP53173"; exon_number "1"; gene_source "ena"; gene_biotype "protein_coding"; transcript_source "ena"; transcript_biotype "protein_coding";	147	3
DS499596	2703238	2703239	DS499596	2703439	2703442	AFUB_043450	.	+	ena	start_codon	0	gene_id "AFUB_043450"; transcript_id "EDP53175"; exon_number "1"; gene_source "ena"; gene_biotype "protein_coding"; transcript_source "ena"; transcript_biotype "protein_coding";	201	3
DS499596	2731878	2731879	DS499596	2732033	2732036	AFUB_043550	.	+	ena	start_codon	0	gene_id "AFUB_043550"; transcript_id "EDP53185"; exon_number "1"; gene_source "ena"; gene_biotype "protein_coding"; transcript_source "ena"; transcript_biotype "protein_coding";	155	3
DS499596	2738959	2738960	DS499596	2739534	2739537	AFUB_043570	.	+	ena	start_codon	0	gene_id "AFUB_043570"; transcript_id "EDP53187"; exon_number "1"; gene_source "ena"; gene_biotype "protein_coding"; transcript_source "ena"; transcript_biotype "protein_coding";	575	3
DS499596	2742625	2742626	DS499596	2742656	2742659	AFUB_043580	.	+	ena	start_codon	0	gene_id "AFUB_043580"; transcript_id "EDP53188"; exon_number "1"; gene_source "ena"; gene_biotype "protein_coding"; transcript_source "ena"; transcript_biotype "protein_coding";	31	3
DS499596	2746069	2746070	DS499596	2746282	2746285	AFUB_043600	.	+	ena	start_codon	0	gene_id "AFUB_043600"; transcript_id "EDP53190"; exon_number "1"; gene_source "ena"; gene_biotype "protein_coding"; transcript_source "ena"; transcript_biotype "protein_coding";	213	3
DS499596	2756006	2756007	DS499596	2756118	2756121	AFUB_043650	.	+	ena	start_codon	0	gene_id "AFUB_043650"; transcript_id "EDP53195"; exon_number "1"; gene_source "ena"; gene_biotype "protein_coding"; transcript_source "ena"; transcript_biotype "protein_coding";	112	3
DS499596	2851319	2851320	DS499596	2851675	2851678	AFUB_043770	.	+	ena	start_codon	0	gene_id "AFUB_043770"; transcript_id "EDP53207"; exon_number "1"; gene_source "ena"; gene_biotype "protein_coding"; transcript_source "ena"; transcript_biotype "protein_coding";	356	3
DS499596	2873892	2873893	DS499596	2874016	2874019	AFUB_043850	.	+	ena	start_codon	0	gene_id "AFUB_043850"; transcript_id "EDP53215"; exon_number "1"; gene_source "ena"; gene_biotype "protein_coding"; transcript_source "ena"; transcript_biotype "protein_coding";	124	3
DS499596	2878080	2878081	DS499596	2878352	2878355	AFUB_043860	.	+	ena	start_codon	0	gene_id "AFUB_043860"; transcript_id "EDP53216"; exon_number "1"; gene_source "ena"; gene_biotype "protein_coding"; transcript_source "ena"; transcript_biotype "protein_coding";	272	3
DS499596	2880065	2880066	DS499596	2880180	2880183	AFUB_043870	.	+	ena	start_codon	0	gene_id "AFUB_043870"; transcript_id "EDP53217"; exon_number "1"; gene_source "ena"; gene_biotype "protein_coding"; transcript_source "ena"; transcript_biotype "protein_coding";	115	3
DS499596	2981118	2981119	DS499596	2981233	2981236	AFUB_044280	.	+	ena	start_codon	0	gene_id "AFUB_044280"; transcript_id "EDP53256"; exon_number "1"; gene_source "ena"; gene_biotype "protein_coding"; transcript_source "ena"; transcript_biotype "protein_coding";	115	3
DS499596	2994974	2994975	DS499596	2995006	2995009	AFUB_044320	.	+	ena	start_codon	0	gene_id "AFUB_044320"; transcript_id "EDP53260"; exon_number "1"; gene_source "ena"; gene_biotype "protein_coding"; transcript_source "ena"; transcript_biotype "protein_coding";	32	3
DS499596	2994981	2994982	DS499596	2995006	2995009	AFUB_044320	.	+	ena	start_codon	0	gene_id "AFUB_044320"; transcript_id "EDP53260"; exon_number "1"; gene_source "ena"; gene_biotype "protein_coding"; transcript_source "ena"; transcript_biotype "protein_coding";	25	3
DS499596	2998389	2998390	DS499596	2998726	2998729	AFUB_044340	.	+	ena	start_codon	0	gene_id "AFUB_044340"; transcript_id "EDP53262"; exon_number "1"; gene_source "ena"; gene_biotype "protein_coding"; transcript_source "ena"; transcript_biotype "protein_coding";	337	3
DS499596	3017262	3017263	DS499596	3017263	3017266	AFUB_044400	.	+	ena	start_codon	0	gene_id "AFUB_044400"; transcript_id "EDP53268"; exon_number "1"; gene_source "ena"; gene_biotype "protein_coding"; transcript_source "ena"; transcript_biotype "protein_coding";	1	3
DS499596	3020968	3020969	DS499596	3020900	3021348	AFUB_044420	.	+	ena	CDS	0	gene_id "AFUB_044420"; transcript_id "EDP53270"; exon_number "1"; gene_source "ena"; gene_biotype "protein_coding"; transcript_source "ena"; transcript_biotype "protein_coding"; protein_id "EDP53270";	0	3
DS499596	3027129	3027130	DS499596	3027461	3027464	AFUB_044430	.	+	ena	start_codon	0	gene_id "AFUB_044430"; transcript_id "EDP53271"; exon_number "1"; gene_source "ena"; gene_biotype "protein_coding"; transcript_source "ena"; transcript_biotype "protein_coding";	332	3
DS499596	3052932	3052933	DS499596	3052902	3053192	AFUB_044500	.	+	ena	CDS	0	gene_id "AFUB_044500"; transcript_id "EDP53278"; exon_number "1"; gene_source "ena"; gene_biotype "protein_coding"; transcript_source "ena"; transcript_biotype "protein_coding"; protein_id "EDP53278";	0	3
DS499596	3116692	3116693	DS499596	3116801	3116804	AFUB_044560	.	+	ena	start_codon	0	gene_id "AFUB_044560"; transcript_id "EDP53284"; exon_number "1"; gene_source "ena"; gene_biotype "protein_coding"; transcript_source "ena"; transcript_biotype "protein_coding";	109	3
DS499596	3142443	3142444	DS499596	3142542	3142545	AFUB_044610	.	+	ena	start_codon	0	gene_id "AFUB_044610"; transcript_id "EDP53288"; exon_number "1"; gene_source "ena"; gene_biotype "protein_coding"; transcript_source "ena"; transcript_biotype "protein_coding";	99	3
DS499596	3209811	3209812	DS499596	3209862	3209865	AFUB_044860	.	+	ena	start_codon	0	gene_id "AFUB_044860"; transcript_id "EDP53313"; exon_number "1"; gene_source "ena"; gene_biotype "protein_coding"; transcript_source "ena"; transcript_biotype "protein_coding";	51	3
DS499596	3213191	3213192	DS499596	3213302	3213305	AFUB_044890	.	+	ena	start_codon	0	gene_id "AFUB_044890"; transcript_id "EDP53315"; exon_number "1"; gene_source "ena"; gene_biotype "protein_coding"; transcript_source "ena"; transcript_biotype "protein_coding";	111	3
DS499596	3223892	3223893	DS499596	3223961	3223964	AFUB_044920	.	+	ena	start_codon	0	gene_id "AFUB_044920"; transcript_id "EDP53318"; exon_number "1"; gene_source "ena"; gene_biotype "protein_coding"; transcript_source "ena"; transcript_biotype "protein_coding";	69	3
DS499596	3291526	3291527	DS499596	3291615	3291618	AFUB_045170	.	+	ena	start_codon	0	gene_id "AFUB_045170"; transcript_id "EDP53342"; exon_number "1"; gene_source "ena"; gene_biotype "protein_coding"; transcript_source "ena"; transcript_biotype "protein_coding";	89	3
DS499596	3301623	3301624	DS499596	3301689	3301692	AFUB_045220	.	+	ena	start_codon	0	gene_id "AFUB_045220"; transcript_id "EDP53347"; exon_number "1"; gene_source "ena"; gene_biotype "protein_coding"; transcript_source "ena"; transcript_biotype "protein_coding";	66	3
DS499596	3305191	3305192	DS499596	3305237	3305240	AFUB_045240	.	+	ena	start_codon	0	gene_id "AFUB_045240"; transcript_id "EDP53349"; exon_number "1"; gene_source "ena"; gene_biotype "protein_coding"; transcript_source "ena"; transcript_biotype "protein_coding";	46	3
DS499596	3436584	3436585	DS499596	3436634	3436637	AFUB_045650	.	+	ena	start_codon	0	gene_id "AFUB_045650"; transcript_id "EDP53390"; exon_number "1"; gene_source "ena"; gene_biotype "protein_coding"; transcript_source "ena"; transcript_biotype "protein_coding";	50	3
DS499596	3536795	3536796	DS499596	3536839	3536842	AFUB_045990	.	+	ena	start_codon	0	gene_id "AFUB_045990"; transcript_id "EDP53424"; exon_number "1"; gene_source "ena"; gene_biotype "protein_coding"; transcript_source "ena"; transcript_biotype "protein_coding";	44	3
DS499596	3539510	3539511	DS499596	3539627	3539630	AFUB_046000	.	+	ena	start_codon	0	gene_id "AFUB_046000"; transcript_id "EDP53425"; exon_number "1"; gene_source "ena"; gene_biotype "protein_coding"; transcript_source "ena"; transcript_biotype "protein_coding";	117	3
DS499596	3561423	3561424	DS499596	3561470	3561473	AFUB_046080	.	+	ena	start_codon	0	gene_id "AFUB_046080"; transcript_id "EDP53432"; exon_number "1"; gene_source "ena"; gene_biotype "protein_coding"; transcript_source "ena"; transcript_biotype "protein_coding";	47	3
DS499596	3562619	3562620	DS499596	3562651	3562654	AFUB_046090	.	+	ena	start_codon	0	gene_id "AFUB_046090"; transcript_id "EDP53433"; exon_number "1"; gene_source "ena"; gene_biotype "protein_coding"; transcript_source "ena"; transcript_biotype "protein_coding";	32	3
DS499596	3575139	3575140	DS499596	3575182	3575185	AFUB_046180	.	+	ena	start_codon	0	gene_id "AFUB_046180"; transcript_id "EDP53442"; exon_number "1"; gene_source "ena"; gene_biotype "protein_coding"; transcript_source "ena"; transcript_biotype "protein_coding";	43	3
DS499596	3651187	3651188	DS499596	3651368	3651371	AFUB_046520	.	+	ena	start_codon	0	gene_id "AFUB_046520"; transcript_id "EDP53473"; exon_number "1"; gene_source "ena"; gene_biotype "protein_coding"; transcript_source "ena"; transcript_biotype "protein_coding";	181	3
DS499596	3694279	3694280	DS499596	3694330	3694333	AFUB_046720	.	+	ena	start_codon	0	gene_id "AFUB_046720"; transcript_id "EDP53493"; exon_number "1"; gene_source "ena"; gene_biotype "protein_coding"; transcript_source "ena"; transcript_biotype "protein_coding";	51	3
DS499596	3710938	3710939	DS499596	3710983	3710986	AFUB_046780	.	+	ena	start_codon	0	gene_id "AFUB_046780"; transcript_id "EDP53499"; exon_number "1"; gene_source "ena"; gene_biotype "protein_coding"; transcript_source "ena"; transcript_biotype "protein_coding";	45	3
DS499596	3719424	3719425	DS499596	3719392	3719493	AFUB_046830	.	+	ena	CDS	0	gene_id "AFUB_046830"; transcript_id "EDP53503"; exon_number "1"; gene_source "ena"; gene_biotype "protein_coding"; transcript_source "ena"; transcript_biotype "protein_coding"; protein_id "EDP53503";	0	3
DS499596	3736730	3736731	DS499596	3736753	3736756	AFUB_046910	.	+	ena	start_codon	0	gene_id "AFUB_046910"; transcript_id "EDP53510"; exon_number "1"; gene_source "ena"; gene_biotype "protein_coding"; transcript_source "ena"; transcript_biotype "protein_coding";	23	3
DS499596	3777832	3777833	DS499596	3777917	3777920	AFUB_047010	.	+	ena	start_codon	0	gene_id "AFUB_047010"; transcript_id "EDP53520"; exon_number "1"; gene_source "ena"; gene_biotype "protein_coding"; transcript_source "ena"; transcript_biotype "protein_coding";	85	3
DS499596	3790086	3790087	DS499596	3790167	3790170	AFUB_047040	.	+	ena	start_codon	0	gene_id "AFUB_047040"; transcript_id "EDP53523"; exon_number "1"; gene_source "ena"; gene_biotype "protein_coding"; transcript_source "ena"; transcript_biotype "protein_coding";	81	3
DS499596	3791089	3791090	DS499596	3791136	3791139	AFUB_047050	.	+	ena	start_codon	0	gene_id "AFUB_047050"; transcript_id "EDP53524"; exon_number "1"; gene_source "ena"; gene_biotype "protein_coding"; transcript_source "ena"; transcript_biotype "protein_coding";	47	3
DS499596	3821882	3821883	DS499596	3822003	3822006	AFUB_047190	.	+	ena	start_codon	0	gene_id "AFUB_047190"; transcript_id "EDP53538"; exon_number "1"; gene_source "ena"; gene_biotype "protein_coding"; transcript_source "ena"; transcript_biotype "protein_coding";	121	3
DS499596	3829668	3829669	DS499596	3829890	3829893	AFUB_047210	.	+	ena	start_codon	0	gene_id "AFUB_047210"; transcript_id "EDP53539"; exon_number "1"; gene_source "ena"; gene_biotype "protein_coding"; transcript_source "ena"; transcript_biotype "protein_coding";	222	3
DS499596	3853763	3853764	DS499596	3853889	3853892	AFUB_047300	.	+	ena	start_codon	0	gene_id "AFUB_047300"; transcript_id "EDP53548"; exon_number "1"; gene_source "ena"; gene_biotype "protein_coding"; transcript_source "ena"; transcript_biotype "protein_coding";	126	3
DS499596	3909230	3909231	DS499596	3909748	3909751	AFUB_047500	.	+	ena	start_codon	0	gene_id "AFUB_047500"; transcript_id "EDP53568"; exon_number "1"; gene_source "ena"; gene_biotype "protein_coding"; transcript_source "ena"; transcript_biotype "protein_coding";	518	3
DS499596	3915858	3915859	DS499596	3915905	3915908	AFUB_047520	.	+	ena	start_codon	0	gene_id "AFUB_047520"; transcript_id "EDP53570"; exon_number "1"; gene_source "ena"; gene_biotype "protein_coding"; transcript_source "ena"; transcript_biotype "protein_coding";	47	3
DS499596	3923416	3923417	DS499596	3923497	3923500	AFUB_047560	.	+	ena	start_codon	0	gene_id "AFUB_047560"; transcript_id "EDP53574"; exon_number "1"; gene_source "ena"; gene_biotype "protein_coding"; transcript_source "ena"; transcript_biotype "protein_coding";	81	3
DS499596	3936042	3936043	DS499596	3936134	3936137	AFUB_047590	.	+	ena	start_codon	0	gene_id "AFUB_047590"; transcript_id "EDP53577"; exon_number "1"; gene_source "ena"; gene_biotype "protein_coding"; transcript_source "ena"; transcript_biotype "protein_coding";	92	3
DS499596	4023229	4023230	DS499596	4023579	4023582	AFUB_047980	.	+	ena	start_codon	0	gene_id "AFUB_047980"; transcript_id "EDP53612"; exon_number "1"; gene_source "ena"; gene_biotype "protein_coding"; transcript_source "ena"; transcript_biotype "protein_coding";	350	3
DS499596	4070568	4070569	DS499596	4071059	4071062	AFUB_048180	.	+	ena	start_codon	0	gene_id "AFUB_048180"; transcript_id "EDP53632"; exon_number "1"; gene_source "ena"; gene_biotype "protein_coding"; transcript_source "ena"; transcript_biotype "protein_coding";	491	3
DS499596	4070881	4070882	DS499596	4071059	4071062	AFUB_048180	.	+	ena	start_codon	0	gene_id "AFUB_048180"; transcript_id "EDP53632"; exon_number "1"; gene_source "ena"; gene_biotype "protein_coding"; transcript_source "ena"; transcript_biotype "protein_coding";	178	3
DS499596	4093847	4093848	DS499596	4093903	4093906	AFUB_048250	.	+	ena	start_codon	0	gene_id "AFUB_048250"; transcript_id "EDP53639"; exon_number "1"; gene_source "ena"; gene_biotype "protein_coding"; transcript_source "ena"; transcript_biotype "protein_coding";	56	3
DS499596	4099903	4099904	DS499596	4099921	4099924	AFUB_048290	.	+	ena	start_codon	0	gene_id "AFUB_048290"; transcript_id "EDP53643"; exon_number "1"; gene_source "ena"; gene_biotype "protein_coding"; transcript_source "ena"; transcript_biotype "protein_coding";	18	3
DS499596	4168566	4168567	DS499596	4168605	4168608	AFUB_048440	.	+	ena	start_codon	0	gene_id "AFUB_048440"; transcript_id "EDP53658"; exon_number "1"; gene_source "ena"; gene_biotype "protein_coding"; transcript_source "ena"; transcript_biotype "protein_coding";	39	3
DS499596	4171528	4171529	DS499596	4172784	4172787	AFUB_048450	.	+	ena	start_codon	0	gene_id "AFUB_048450"; transcript_id "EDP53659"; exon_number "1"; gene_source "ena"; gene_biotype "protein_coding"; transcript_source "ena"; transcript_biotype "protein_coding";	1256	3
DS499596	4197360	4197361	DS499596	4197380	4197383	AFUB_048510	.	+	ena	start_codon	0	gene_id "AFUB_048510"; transcript_id "EDP53665"; exon_number "1"; gene_source "ena"; gene_biotype "protein_coding"; transcript_source "ena"; transcript_biotype "protein_coding";	20	3
DS499596	4228809	4228810	DS499596	4229148	4229151	AFUB_048580	.	+	ena	start_codon	0	gene_id "AFUB_048580"; transcript_id "EDP53671"; exon_number "1"; gene_source "ena"; gene_biotype "protein_coding"; transcript_source "ena"; transcript_biotype "protein_coding";	339	3
DS499597	162484	162485	DS499597	162537	162540	AFUB_049320	.	+	ena	start_codon	0	gene_id "AFUB_049320"; transcript_id "EDP50931"; exon_number "1"; gene_source "ena"; gene_biotype "protein_coding"; transcript_source "ena"; transcript_biotype "protein_coding";	53	3
DS499597	162488	162489	DS499597	162537	162540	AFUB_049320	.	+	ena	start_codon	0	gene_id "AFUB_049320"; transcript_id "EDP50931"; exon_number "1"; gene_source "ena"; gene_biotype "protein_coding"; transcript_source "ena"; transcript_biotype "protein_coding";	49	3
DS499597	189604	189605	DS499597	189630	189633	AFUB_049480	.	+	ena	start_codon	0	gene_id "AFUB_049480"; transcript_id "EDP50947"; exon_number "1"; gene_source "ena"; gene_biotype "protein_coding"; transcript_source "ena"; transcript_biotype "protein_coding";	26	3
DS499597	189608	189609	DS499597	189630	189633	AFUB_049480	.	+	ena	start_codon	0	gene_id "AFUB_049480"; transcript_id "EDP50947"; exon_number "1"; gene_source "ena"; gene_biotype "protein_coding"; transcript_source "ena"; transcript_biotype "protein_coding";	22	3
DS499597	239197	239198	DS499597	239065	239853	AFUB_049720	.	+	ena	gene	.	gene_id "AFUB_049720"; gene_source "ena"; gene_biotype "protein_coding";	0	3
DS499597	241247	241248	DS499597	241296	241299	AFUB_049730	.	+	ena	start_codon	0	gene_id "AFUB_049730"; transcript_id "EDP50972"; exon_number "1"; gene_source "ena"; gene_biotype "protein_coding"; transcript_source "ena"; transcript_biotype "protein_coding";	49	3
DS499597	320805	320806	DS499597	320866	320869	AFUB_050040	.	+	ena	start_codon	0	gene_id "AFUB_050040"; transcript_id "EDP51002"; exon_number "1"; gene_source "ena"; gene_biotype "protein_coding"; transcript_source "ena"; transcript_biotype "protein_coding";	61	3
DS499597	349136	349137	DS499597	349179	349182	AFUB_050170	.	+	ena	start_codon	0	gene_id "AFUB_050170"; transcript_id "EDP51015"; exon_number "1"; gene_source "ena"; gene_biotype "protein_coding"; transcript_source "ena"; transcript_biotype "protein_coding";	43	3
DS499597	354297	354298	DS499597	354398	354401	AFUB_050190	.	+	ena	start_codon	0	gene_id "AFUB_050190"; transcript_id "EDP51017"; exon_number "1"; gene_source "ena"; gene_biotype "protein_coding"; transcript_source "ena"; transcript_biotype "protein_coding";	101	3
DS499597	385014	385015	DS499597	385009	385246	AFUB_050300	.	+	ena	CDS	0	gene_id "AFUB_050300"; transcript_id "EDP51028"; exon_number "1"; gene_source "ena"; gene_biotype "protein_coding"; transcript_source "ena"; transcript_biotype "protein_coding"; protein_id "EDP51028";	0	3
DS499597	394894	394895	DS499597	395145	395148	AFUB_050350	.	+	ena	start_codon	0	gene_id "AFUB_050350"; transcript_id "EDP51033"; exon_number "1"; gene_source "ena"; gene_biotype "protein_coding"; transcript_source "ena"; transcript_biotype "protein_coding";	251	3
DS499597	411360	411361	DS499597	411396	411399	AFUB_050410	.	+	ena	start_codon	0	gene_id "AFUB_050410"; transcript_id "EDP51039"; exon_number "1"; gene_source "ena"; gene_biotype "protein_coding"; transcript_source "ena"; transcript_biotype "protein_coding";	36	3
DS499597	422864	422865	DS499597	422940	422943	AFUB_050450	.	+	ena	start_codon	0	gene_id "AFUB_050450"; transcript_id "EDP51043"; exon_number "1"; gene_source "ena"; gene_biotype "protein_coding"; transcript_source "ena"; transcript_biotype "protein_coding";	76	3
DS499597	435466	435467	DS499597	435550	435553	AFUB_050480	.	+	ena	start_codon	0	gene_id "AFUB_050480"; transcript_id "EDP51046"; exon_number "1"; gene_source "ena"; gene_biotype "protein_coding"; transcript_source "ena"; transcript_biotype "protein_coding";	84	3
DS499597	437910	437911	DS499597	438097	438100	AFUB_050490	.	+	ena	start_codon	0	gene_id "AFUB_050490"; transcript_id "EDP51047"; exon_number "1"; gene_source "ena"; gene_biotype "protein_coding"; transcript_source "ena"; transcript_biotype "protein_coding";	187	3
DS499597	445254	445255	DS499597	445309	445312	AFUB_050510	.	+	ena	start_codon	0	gene_id "AFUB_050510"; transcript_id "EDP51049"; exon_number "1"; gene_source "ena"; gene_biotype "protein_coding"; transcript_source "ena"; transcript_biotype "protein_coding";	55	3
DS499597	454892	454893	DS499597	454791	455000	AFUB_050550	.	+	ena	CDS	0	gene_id "AFUB_050550"; transcript_id "EDP51053"; exon_number "1"; gene_source "ena"; gene_biotype "protein_coding"; transcript_source "ena"; transcript_biotype "protein_coding"; protein_id "EDP51053";	0	3
DS499597	457509	457510	DS499597	457598	457601	AFUB_050560	.	+	ena	start_codon	0	gene_id "AFUB_050560"; transcript_id "EDP51054"; exon_number "1"; gene_source "ena"; gene_biotype "protein_coding"; transcript_source "ena"; transcript_biotype "protein_coding";	89	3
DS499597	458902	458903	DS499597	459213	459216	AFUB_050570	.	+	ena	start_codon	0	gene_id "AFUB_050570"; transcript_id "EDP51055"; exon_number "1"; gene_source "ena"; gene_biotype "protein_coding"; transcript_source "ena"; transcript_biotype "protein_coding";	311	3
DS499597	460950	460951	DS499597	461123	461126	AFUB_050580	.	+	ena	start_codon	0	gene_id "AFUB_050580"; transcript_id "EDP51056"; exon_number "1"; gene_source "ena"; gene_biotype "protein_coding"; transcript_source "ena"; transcript_biotype "protein_coding";	173	3
DS499597	464143	464144	DS499597	464197	464200	AFUB_050610	.	+	ena	start_codon	0	gene_id "AFUB_050610"; transcript_id "EDP51059"; exon_number "1"; gene_source "ena"; gene_biotype "protein_coding"; transcript_source "ena"; transcript_biotype "protein_coding";	54	3
DS499597	493363	493364	DS499597	493415	493418	AFUB_050710	.	+	ena	start_codon	0	gene_id "AFUB_050710"; transcript_id "EDP51069"; exon_number "1"; gene_source "ena"; gene_biotype "protein_coding"; transcript_source "ena"; transcript_biotype "protein_coding";	52	3
DS499597	506164	506165	DS499597	506222	506225	AFUB_050770	.	+	ena	start_codon	0	gene_id "AFUB_050770"; transcript_id "EDP51075"; exon_number "1"; gene_source "ena"; gene_biotype "protein_coding"; transcript_source "ena"; transcript_biotype "protein_coding";	58	3
DS499597	506168	506169	DS499597	506222	506225	AFUB_050770	.	+	ena	start_codon	0	gene_id "AFUB_050770"; transcript_id "EDP51075"; exon_number "1"; gene_source "ena"; gene_biotype "protein_coding"; transcript_source "ena"; transcript_biotype "protein_coding";	54	3
DS499597	532665	532666	DS499597	532696	532699	AFUB_050860	.	+	ena	start_codon	0	gene_id "AFUB_050860"; transcript_id "EDP51084"; exon_number "1"; gene_source "ena"; gene_biotype "protein_coding"; transcript_source "ena"; transcript_biotype "protein_coding";	31	3
DS499597	537454	537455	DS499597	537367	538627	AFUB_050880	.	+	ena	gene	.	gene_id "AFUB_050880"; gene_source "ena"; gene_biotype "protein_coding";	0	3
DS499597	552216	552217	DS499597	553037	553040	AFUB_050930	.	+	ena	start_codon	0	gene_id "AFUB_050930"; transcript_id "EDP51091"; exon_number "1"; gene_source "ena"; gene_biotype "protein_coding"; transcript_source "ena"; transcript_biotype "protein_coding";	821	3
DS499597	557653	557654	DS499597	557709	557712	AFUB_050950	.	+	ena	start_codon	0	gene_id "AFUB_050950"; transcript_id "EDP51093"; exon_number "1"; gene_source "ena"; gene_biotype "protein_coding"; transcript_source "ena"; transcript_biotype "protein_coding";	56	3
DS499597	566110	566111	DS499597	566186	566189	AFUB_050980	.	+	ena	start_codon	0	gene_id "AFUB_050980"; transcript_id "EDP51096"; exon_number "1"; gene_source "ena"; gene_biotype "protein_coding"; transcript_source "ena"; transcript_biotype "protein_coding";	76	3
DS499597	587221	587222	DS499597	587496	587499	AFUB_051060	.	+	ena	start_codon	0	gene_id "AFUB_051060"; transcript_id "EDP51104"; exon_number "1"; gene_source "ena"; gene_biotype "protein_coding"; transcript_source "ena"; transcript_biotype "protein_coding";	275	3
DS499597	590184	590185	DS499597	590890	590893	AFUB_051070	.	+	ena	start_codon	0	gene_id "AFUB_051070"; transcript_id "EDP51105"; exon_number "1"; gene_source "ena"; gene_biotype "protein_coding"; transcript_source "ena"; transcript_biotype "protein_coding";	706	3
DS499597	595611	595612	DS499597	595964	595967	AFUB_051090	.	+	ena	start_codon	0	gene_id "AFUB_051090"; transcript_id "EDP51107"; exon_number "1"; gene_source "ena"; gene_biotype "protein_coding"; transcript_source "ena"; transcript_biotype "protein_coding";	353	3
DS499597	619700	619701	DS499597	619753	619756	AFUB_051140	.	+	ena	start_codon	0	gene_id "AFUB_051140"; transcript_id "EDP51112"; exon_number "1"; gene_source "ena"; gene_biotype "protein_coding"; transcript_source "ena"; transcript_biotype "protein_coding";	53	3
DS499597	629016	629017	DS499597	629199	629202	AFUB_051190	.	+	ena	start_codon	0	gene_id "AFUB_051190"; transcript_id "EDP51117"; exon_number "1"; gene_source "ena"; gene_biotype "protein_coding"; transcript_source "ena"; transcript_biotype "protein_coding";	183	3
DS499597	644187	644188	DS499597	644400	644403	AFUB_051250	.	+	ena	start_codon	0	gene_id "AFUB_051250"; transcript_id "EDP51123"; exon_number "1"; gene_source "ena"; gene_biotype "protein_coding"; transcript_source "ena"; transcript_biotype "protein_coding";	213	3
DS499597	651930	651931	DS499597	651988	651991	AFUB_051270	.	+	ena	start_codon	0	gene_id "AFUB_051270"; transcript_id "EDP51125"; exon_number "1"; gene_source "ena"; gene_biotype "protein_coding"; transcript_source "ena"; transcript_biotype "protein_coding";	58	3
DS499597	686861	686862	DS499597	686925	686928	AFUB_051370	.	+	ena	start_codon	0	gene_id "AFUB_051370"; transcript_id "EDP51135"; exon_number "1"; gene_source "ena"; gene_biotype "protein_coding"; transcript_source "ena"; transcript_biotype "protein_coding";	64	3
DS499597	729861	729862	DS499597	729911	729914	AFUB_051500	.	+	ena	start_codon	0	gene_id "AFUB_051500"; transcript_id "EDP51148"; exon_number "1"; gene_source "ena"; gene_biotype "protein_coding"; transcript_source "ena"; transcript_biotype "protein_coding";	50	3
DS499597	736148	736149	DS499597	736729	736732	AFUB_051520	.	+	ena	start_codon	0	gene_id "AFUB_051520"; transcript_id "EDP51150"; exon_number "1"; gene_source "ena"; gene_biotype "protein_coding"; transcript_source "ena"; transcript_biotype "protein_coding";	581	3
DS499597	738747	738748	DS499597	738791	738794	AFUB_051530	.	+	ena	start_codon	0	gene_id "AFUB_051530"; transcript_id "EDP51151"; exon_number "1"; gene_source "ena"; gene_biotype "protein_coding"; transcript_source "ena"; transcript_biotype "protein_coding";	44	3
DS499597	755662	755663	DS499597	755702	755705	AFUB_051560	.	+	ena	start_codon	0	gene_id "AFUB_051560"; transcript_id "EDP51154"; exon_number "1"; gene_source "ena"; gene_biotype "protein_coding"; transcript_source "ena"; transcript_biotype "protein_coding";	40	3
DS499597	767293	767294	DS499597	767010	770268	AFUB_051600	.	+	ena	gene	.	gene_id "AFUB_051600"; gene_source "ena"; gene_biotype "protein_coding";	0	3
DS499597	802066	802067	DS499597	802200	802203	AFUB_051730	.	+	ena	start_codon	0	gene_id "AFUB_051730"; transcript_id "EDP51171"; exon_number "1"; gene_source "ena"; gene_biotype "protein_coding"; transcript_source "ena"; transcript_biotype "protein_coding";	134	3
DS499597	811826	811827	DS499597	811921	811924	AFUB_051770	.	+	ena	start_codon	0	gene_id "AFUB_051770"; transcript_id "EDP51175"; exon_number "1"; gene_source "ena"; gene_biotype "protein_coding"; transcript_source "ena"; transcript_biotype "protein_coding";	95	3
DS499597	824712	824713	DS499597	824945	824948	AFUB_051830	.	+	ena	start_codon	0	gene_id "AFUB_051830"; transcript_id "EDP51179"; exon_number "1"; gene_source "ena"; gene_biotype "protein_coding"; transcript_source "ena"; transcript_biotype "protein_coding";	233	3
DS499597	826670	826671	DS499597	826983	826986	AFUB_051850	.	+	ena	start_codon	0	gene_id "AFUB_051850"; transcript_id "EDP51181"; exon_number "1"; gene_source "ena"; gene_biotype "protein_coding"; transcript_source "ena"; transcript_biotype "protein_coding";	313	3
DS499597	832534	832535	DS499597	832593	832596	AFUB_051870	.	+	ena	start_codon	0	gene_id "AFUB_051870"; transcript_id "EDP51183"; exon_number "1"; gene_source "ena"; gene_biotype "protein_coding"; transcript_source "ena"; transcript_biotype "protein_coding";	59	3
DS499597	844684	844685	DS499597	844781	844784	AFUB_051900	.	+	ena	start_codon	0	gene_id "AFUB_051900"; transcript_id "EDP51186"; exon_number "1"; gene_source "ena"; gene_biotype "protein_coding"; transcript_source "ena"; transcript_biotype "protein_coding";	97	3
DS499597	846631	846632	DS499597	846726	846729	AFUB_051910	.	+	ena	start_codon	0	gene_id "AFUB_051910"; transcript_id "EDP51187"; exon_number "1"; gene_source "ena"; gene_biotype "protein_coding"; transcript_source "ena"; transcript_biotype "protein_coding";	95	3
DS499597	869772	869773	DS499597	869831	869834	AFUB_051980	.	+	ena	start_codon	0	gene_id "AFUB_051980"; transcript_id "EDP51194"; exon_number "1"; gene_source "ena"; gene_biotype "protein_coding"; transcript_source "ena"; transcript_biotype "protein_coding";	59	3
DS499597	874450	874451	DS499597	874166	875247	AFUB_052000	.	+	ena	gene	.	gene_id "AFUB_052000"; gene_source "ena"; gene_biotype "protein_coding";	0	3
DS499597	876697	876698	DS499597	876811	876814	AFUB_052020	.	+	ena	start_codon	0	gene_id "AFUB_052020"; transcript_id "EDP51198"; exon_number "1"; gene_source "ena"; gene_biotype "protein_coding"; transcript_source "ena"; transcript_biotype "protein_coding";	114	3
DS499597	881856	881857	DS499597	881963	881966	AFUB_052040	.	+	ena	start_codon	0	gene_id "AFUB_052040"; transcript_id "EDP51200"; exon_number "1"; gene_source "ena"; gene_biotype "protein_coding"; transcript_source "ena"; transcript_biotype "protein_coding";	107	3
DS499597	886420	886421	DS499597	886465	886468	AFUB_052060	.	+	ena	start_codon	0	gene_id "AFUB_052060"; transcript_id "EDP51202"; exon_number "1"; gene_source "ena"; gene_biotype "protein_coding"; transcript_source "ena"; transcript_biotype "protein_coding";	45	3
DS499597	895611	895612	DS499597	895654	895657	AFUB_052090	.	+	ena	start_codon	0	gene_id "AFUB_052090"; transcript_id "EDP51205"; exon_number "1"; gene_source "ena"; gene_biotype "protein_coding"; transcript_source "ena"; transcript_biotype "protein_coding";	43	3
DS499597	903788	903789	DS499597	903962	903965	AFUB_052140	.	+	ena	start_codon	0	gene_id "AFUB_052140"; transcript_id "EDP51210"; exon_number "1"; gene_source "ena"; gene_biotype "protein_coding"; transcript_source "ena"; transcript_biotype "protein_coding";	174	3
DS499597	904899	904900	DS499597	905227	905230	AFUB_052150	.	+	ena	start_codon	0	gene_id "AFUB_052150"; transcript_id "EDP51211"; exon_number "1"; gene_source "ena"; gene_biotype "protein_coding"; transcript_source "ena"; transcript_biotype "protein_coding";	328	3
DS499597	947605	947606	DS499597	947619	947622	AFUB_052290	.	+	ena	start_codon	0	gene_id "AFUB_052290"; transcript_id "EDP51225"; exon_number "1"; gene_source "ena"; gene_biotype "protein_coding"; transcript_source "ena"; transcript_biotype "protein_coding";	14	3
DS499597	951802	951803	DS499597	951856	951859	AFUB_052310	.	+	ena	start_codon	0	gene_id "AFUB_052310"; transcript_id "EDP51227"; exon_number "1"; gene_source "ena"; gene_biotype "protein_coding"; transcript_source "ena"; transcript_biotype "protein_coding";	54	3
DS499597	968318	968319	DS499597	968378	968381	AFUB_052390	.	+	ena	start_codon	0	gene_id "AFUB_052390"; transcript_id "EDP51235"; exon_number "1"; gene_source "ena"; gene_biotype "protein_coding"; transcript_source "ena"; transcript_biotype "protein_coding";	60	3
DS499597	994535	994536	DS499597	994641	994644	AFUB_052490	.	+	ena	start_codon	0	gene_id "AFUB_052490"; transcript_id "EDP51245"; exon_number "1"; gene_source "ena"; gene_biotype "protein_coding"; transcript_source "ena"; transcript_biotype "protein_coding";	106	3
DS499597	996988	996989	DS499597	997062	997065	AFUB_052500	.	+	ena	start_codon	0	gene_id "AFUB_052500"; transcript_id "EDP51246"; exon_number "1"; gene_source "ena"; gene_biotype "protein_coding"; transcript_source "ena"; transcript_biotype "protein_coding";	74	3
DS499597	999650	999651	DS499597	1000108	1000111	AFUB_052520	.	+	ena	start_codon	0	gene_id "AFUB_052520"; transcript_id "EDP51248"; exon_number "1"; gene_source "ena"; gene_biotype "protein_coding"; transcript_source "ena"; transcript_biotype "protein_coding";	458	3
DS499597	1008763	1008764	DS499597	1008914	1008917	AFUB_052560	.	+	ena	start_codon	0	gene_id "AFUB_052560"; transcript_id "EDP51252"; exon_number "1"; gene_source "ena"; gene_biotype "protein_coding"; transcript_source "ena"; transcript_biotype "protein_coding";	151	3
DS499597	1011041	1011042	DS499597	1011284	1011287	AFUB_052570	.	+	ena	start_codon	0	gene_id "AFUB_052570"; transcript_id "EDP51253"; exon_number "1"; gene_source "ena"; gene_biotype "protein_coding"; transcript_source "ena"; transcript_biotype "protein_coding";	243	3
DS499597	1011073	1011074	DS499597	1011284	1011287	AFUB_052570	.	+	ena	start_codon	0	gene_id "AFUB_052570"; transcript_id "EDP51253"; exon_number "1"; gene_source "ena"; gene_biotype "protein_coding"; transcript_source "ena"; transcript_biotype "protein_coding";	211	3
DS499597	1017077	1017078	DS499597	1017269	1017272	AFUB_052600	.	+	ena	start_codon	0	gene_id "AFUB_052600"; transcript_id "EDP51256"; exon_number "1"; gene_source "ena"; gene_biotype "protein_coding"; transcript_source "ena"; transcript_biotype "protein_coding";	192	3
DS499597	1017262	1017263	DS499597	1017269	1017272	AFUB_052600	.	+	ena	start_codon	0	gene_id "AFUB_052600"; transcript_id "EDP51256"; exon_number "1"; gene_source "ena"; gene_biotype "protein_coding"; transcript_source "ena"; transcript_biotype "protein_coding";	7	3
DS499597	1020864	1020865	DS499597	1020998	1021001	AFUB_052620	.	+	ena	start_codon	0	gene_id "AFUB_052620"; transcript_id "EDP51258"; exon_number "1"; gene_source "ena"; gene_biotype "protein_coding"; transcript_source "ena"; transcript_biotype "protein_coding";	134	3
DS499597	1022490	1022491	DS499597	1022512	1022515	AFUB_052630	.	+	ena	start_codon	0	gene_id "AFUB_052630"; transcript_id "EDP51259"; exon_number "1"; gene_source "ena"; gene_biotype "protein_coding"; transcript_source "ena"; transcript_biotype "protein_coding";	22	3
DS499597	1036452	1036453	DS499597	1036764	1036767	AFUB_052690	.	+	ena	start_codon	0	gene_id "AFUB_052690"; transcript_id "EDP51265"; exon_number "1"; gene_source "ena"; gene_biotype "protein_coding"; transcript_source "ena"; transcript_biotype "protein_coding";	312	3
DS499597	1050234	1050235	DS499597	1052260	1052263	AFUB_052730	.	+	ena	start_codon	0	gene_id "AFUB_052730"; transcript_id "EDP51269"; exon_number "1"; gene_source "ena"; gene_biotype "protein_coding"; transcript_source "ena"; transcript_biotype "protein_coding";	2026	3
DS499597	1052155	1052156	DS499597	1052260	1052263	AFUB_052730	.	+	ena	start_codon	0	gene_id "AFUB_052730"; transcript_id "EDP51269"; exon_number "1"; gene_source "ena"; gene_biotype "protein_coding"; transcript_source "ena"; transcript_biotype "protein_coding";	105	3
DS499597	1060525	1060526	DS499597	1060992	1060995	AFUB_052760	.	+	ena	start_codon	0	gene_id "AFUB_052760"; transcript_id "EDP51272"; exon_number "1"; gene_source "ena"; gene_biotype "protein_coding"; transcript_source "ena"; transcript_biotype "protein_coding";	467	3
DS499597	1070674	1070675	DS499597	1071145	1071148	AFUB_052780	.	+	ena	start_codon	0	gene_id "AFUB_052780"; transcript_id "EDP51274"; exon_number "1"; gene_source "ena"; gene_biotype "protein_coding"; transcript_source "ena"; transcript_biotype "protein_coding";	471	3
DS499597	1071061	1071062	DS499597	1071145	1071148	AFUB_052780	.	+	ena	start_codon	0	gene_id "AFUB_052780"; transcript_id "EDP51274"; exon_number "1"; gene_source "ena"; gene_biotype "protein_coding"; transcript_source "ena"; transcript_biotype "protein_coding";	84	3
DS499597	1074204	1074205	DS499597	1074543	1074546	AFUB_052790	.	+	ena	start_codon	0	gene_id "AFUB_052790"; transcript_id "EDP51275"; exon_number "1"; gene_source "ena"; gene_biotype "protein_coding"; transcript_source "ena"; transcript_biotype "protein_coding";	339	3
DS499597	1077548	1077549	DS499597	1077661	1077664	AFUB_052800	.	+	ena	start_codon	0	gene_id "AFUB_052800"; transcript_id "EDP51276"; exon_number "1"; gene_source "ena"; gene_biotype "protein_coding"; transcript_source "ena"; transcript_biotype "protein_coding";	113	3
DS499597	1094845	1094846	DS499597	1095025	1095028	AFUB_052860	.	+	ena	start_codon	0	gene_id "AFUB_052860"; transcript_id "EDP51282"; exon_number "1"; gene_source "ena"; gene_biotype "protein_coding"; transcript_source "ena"; transcript_biotype "protein_coding";	180	3
DS499597	1097040	1097041	DS499597	1097166	1097169	AFUB_052870	.	+	ena	start_codon	0	gene_id "AFUB_052870"; transcript_id "EDP51283"; exon_number "1"; gene_source "ena"; gene_biotype "protein_coding"; transcript_source "ena"; transcript_biotype "protein_coding";	126	3
DS499597	1109162	1109163	DS499597	1109731	1109734	AFUB_052930	.	+	ena	start_codon	0	gene_id "AFUB_052930"; transcript_id "EDP51289"; exon_number "1"; gene_source "ena"; gene_biotype "protein_coding"; transcript_source "ena"; transcript_biotype "protein_coding";	569	3
DS499597	1114856	1114857	DS499597	1115340	1115343	AFUB_052950	.	+	ena	start_codon	0	gene_id "AFUB_052950"; transcript_id "EDP51291"; exon_number "1"; gene_source "ena"; gene_biotype "protein_coding"; transcript_source "ena"; transcript_biotype "protein_coding";	484	3
DS499597	1131907	1131908	DS499597	1131939	1131942	AFUB_053000	.	+	ena	start_codon	0	gene_id "AFUB_053000"; transcript_id "EDP51296"; exon_number "1"; gene_source "ena"; gene_biotype "protein_coding"; transcript_source "ena"; transcript_biotype "protein_coding";	32	3
DS499597	1181641	1181642	DS499597	1181789	1181792	AFUB_053050	.	+	ena	start_codon	0	gene_id "AFUB_053050"; transcript_id "EDP51301"; exon_number "1"; gene_source "ena"; gene_biotype "protein_coding"; transcript_source "ena"; transcript_biotype "protein_coding";	148	3
DS499597	1184219	1184220	DS499597	1184295	1184298	AFUB_053060	.	+	ena	start_codon	0	gene_id "AFUB_053060"; transcript_id "EDP51302"; exon_number "1"; gene_source "ena"; gene_biotype "protein_coding"; transcript_source "ena"; transcript_biotype "protein_coding";	76	3
DS499597	1196440	1196441	DS499597	1196490	1196493	AFUB_053090	.	+	ena	start_codon	0	gene_id "AFUB_053090"; transcript_id "EDP51305"; exon_number "1"; gene_source "ena"; gene_biotype "protein_coding"; transcript_source "ena"; transcript_biotype "protein_coding";	50	3
DS499597	1209578	1209579	DS499597	1209589	1209592	AFUB_053140	.	+	ena	start_codon	0	gene_id "AFUB_053140"; transcript_id "EDP51310"; exon_number "1"; gene_source "ena"; gene_biotype "protein_coding"; transcript_source "ena"; transcript_biotype "protein_coding";	11	3
DS499597	1229395	1229396	DS499597	1229636	1229639	AFUB_053220	.	+	ena	start_codon	0	gene_id "AFUB_053220"; transcript_id "EDP51318"; exon_number "1"; gene_source "ena"; gene_biotype "protein_coding"; transcript_source "ena"; transcript_biotype "protein_coding";	241	3
DS499597	1229398	1229399	DS499597	1229636	1229639	AFUB_053220	.	+	ena	start_codon	0	gene_id "AFUB_053220"; transcript_id "EDP51318"; exon_number "1"; gene_source "ena"; gene_biotype "protein_coding"; transcript_source "ena"; transcript_biotype "protein_coding";	238	3
DS499597	1235217	1235218	DS499597	1236402	1236405	AFUB_053250	.	+	ena	start_codon	0	gene_id "AFUB_053250"; transcript_id "EDP51321"; exon_number "1"; gene_source "ena"; gene_biotype "protein_coding"; transcript_source "ena"; transcript_biotype "protein_coding";	1185	3
DS499597	1250014	1250015	DS499597	1250166	1250169	AFUB_053310	.	+	ena	start_codon	0	gene_id "AFUB_053310"; transcript_id "EDP51327"; exon_number "1"; gene_source "ena"; gene_biotype "protein_coding"; transcript_source "ena"; transcript_biotype "protein_coding";	152	3
DS499597	1263147	1263148	DS499597	1264012	1264015	AFUB_053370	.	+	ena	start_codon	0	gene_id "AFUB_053370"; transcript_id "EDP51333"; exon_number "1"; gene_source "ena"; gene_biotype "protein_coding"; transcript_source "ena"; transcript_biotype "protein_coding";	865	3
DS499597	1287103	1287104	DS499597	1287918	1287921	AFUB_053430	.	+	ena	start_codon	0	gene_id "AFUB_053430"; transcript_id "EDP51339"; exon_number "1"; gene_source "ena"; gene_biotype "protein_coding"; transcript_source "ena"; transcript_biotype "protein_coding";	815	3
DS499597	1289951	1289952	DS499597	1290686	1290689	AFUB_053440	.	+	ena	start_codon	0	gene_id "AFUB_053440"; transcript_id "EDP51340"; exon_number "1"; gene_source "ena"; gene_biotype "protein_coding"; transcript_source "ena"; transcript_biotype "protein_coding";	735	3
DS499597	1290437	1290438	DS499597	1290686	1290689	AFUB_053440	.	+	ena	start_codon	0	gene_id "AFUB_053440"; transcript_id "EDP51340"; exon_number "1"; gene_source "ena"; gene_biotype "protein_coding"; transcript_source "ena"; transcript_biotype "protein_coding";	249	3
DS499597	1342163	1342164	DS499597	1342355	1342358	AFUB_053580	.	+	ena	start_codon	0	gene_id "AFUB_053580"; transcript_id "EDP51354"; exon_number "1"; gene_source "ena"; gene_biotype "protein_coding"; transcript_source "ena"; transcript_biotype "protein_coding";	192	3
DS499597	1348560	1348561	DS499597	1348816	1348819	AFUB_053620	.	+	ena	start_codon	0	gene_id "AFUB_053620"; transcript_id "EDP51356"; exon_number "1"; gene_source "ena"; gene_biotype "protein_coding"; transcript_source "ena"; transcript_biotype "protein_coding";	256	3
DS499597	1359536	1359537	DS499597	1359620	1359623	AFUB_053650	.	+	ena	start_codon	0	gene_id "AFUB_053650"; transcript_id "EDP51359"; exon_number "1"; gene_source "ena"; gene_biotype "protein_coding"; transcript_source "ena"; transcript_biotype "protein_coding";	84	3
DS499597	1378500	1378501	DS499597	1378550	1378553	AFUB_053730	.	+	ena	start_codon	0	gene_id "AFUB_053730"; transcript_id "EDP51367"; exon_number "1"; gene_source "ena"; gene_biotype "protein_coding"; transcript_source "ena"; transcript_biotype "protein_coding";	50	3
DS499597	1386961	1386962	DS499597	1387500	1387503	AFUB_053740	.	+	ena	start_codon	0	gene_id "AFUB_053740"; transcript_id "EDP51368"; exon_number "1"; gene_source "ena"; gene_biotype "protein_coding"; transcript_source "ena"; transcript_biotype "protein_coding";	539	3
DS499597	1390889	1390890	DS499597	1391226	1391229	AFUB_053750	.	+	ena	start_codon	0	gene_id "AFUB_053750"; transcript_id "EDP51369"; exon_number "1"; gene_source "ena"; gene_biotype "protein_coding"; transcript_source "ena"; transcript_biotype "protein_coding";	337	3
DS499597	1393585	1393586	DS499597	1393750	1393753	AFUB_053760	.	+	ena	start_codon	0	gene_id "AFUB_053760"; transcript_id "EDP51370"; exon_number "1"; gene_source "ena"; gene_biotype "protein_coding"; transcript_source "ena"; transcript_biotype "protein_coding";	165	3
DS499597	1409867	1409868	DS499597	1409976	1409979	AFUB_053800	.	+	ena	start_codon	0	gene_id "AFUB_053800"; transcript_id "EDP51374"; exon_number "1"; gene_source "ena"; gene_biotype "protein_coding"; transcript_source "ena"; transcript_biotype "protein_coding";	109	3
DS499597	1409872	1409873	DS499597	1409976	1409979	AFUB_053800	.	+	ena	start_codon	0	gene_id "AFUB_053800"; transcript_id "EDP51374"; exon_number "1"; gene_source "ena"; gene_biotype "protein_coding"; transcript_source "ena"; transcript_biotype "protein_coding";	104	3
DS499597	1421444	1421445	DS499597	1421711	1421714	AFUB_053840	.	+	ena	start_codon	0	gene_id "AFUB_053840"; transcript_id "EDP51378"; exon_number "1"; gene_source "ena"; gene_biotype "protein_coding"; transcript_source "ena"; transcript_biotype "protein_coding";	267	3
DS499597	1441796	1441797	DS499597	1441855	1441858	AFUB_053920	.	+	ena	start_codon	0	gene_id "AFUB_053920"; transcript_id "EDP51386"; exon_number "1"; gene_source "ena"; gene_biotype "protein_coding"; transcript_source "ena"; transcript_biotype "protein_coding";	59	3
DS499597	1460106	1460107	DS499597	1460501	1460504	AFUB_053980	.	+	ena	start_codon	0	gene_id "AFUB_053980"; transcript_id "EDP51392"; exon_number "1"; gene_source "ena"; gene_biotype "protein_coding"; transcript_source "ena"; transcript_biotype "protein_coding";	395	3
DS499597	1463440	1463441	DS499597	1463545	1463548	AFUB_053990	.	+	ena	start_codon	0	gene_id "AFUB_053990"; transcript_id "EDP51393"; exon_number "1"; gene_source "ena"; gene_biotype "protein_coding"; transcript_source "ena"; transcript_biotype "protein_coding";	105	3
DS499597	1490653	1490654	DS499597	1490789	1490792	AFUB_054040	.	+	ena	start_codon	0	gene_id "AFUB_054040"; transcript_id "EDP51398"; exon_number "1"; gene_source "ena"; gene_biotype "protein_coding"; transcript_source "ena"; transcript_biotype "protein_coding";	136	3
DS499597	1496566	1496567	DS499597	1496628	1496631	AFUB_054070	.	+	ena	start_codon	0	gene_id "AFUB_054070"; transcript_id "EDP51401"; exon_number "1"; gene_source "ena"; gene_biotype "protein_coding"; transcript_source "ena"; transcript_biotype "protein_coding";	62	3
DS499597	1500437	1500438	DS499597	1500484	1500487	AFUB_054090	.	+	ena	start_codon	0	gene_id "AFUB_054090"; transcript_id "EDP51403"; exon_number "1"; gene_source "ena"; gene_biotype "protein_coding"; transcript_source "ena"; transcript_biotype "protein_coding";	47	3
DS499597	1505746	1505747	DS499597	1505805	1505808	AFUB_054110	.	+	ena	start_codon	0	gene_id "AFUB_054110"; transcript_id "EDP51405"; exon_number "1"; gene_source "ena"; gene_biotype "protein_coding"; transcript_source "ena"; transcript_biotype "protein_coding";	59	3
DS499597	1546476	1546477	DS499597	1546723	1546726	AFUB_054240	.	+	ena	start_codon	0	gene_id "AFUB_054240"; transcript_id "EDP51418"; exon_number "1"; gene_source "ena"; gene_biotype "protein_coding"; transcript_source "ena"; transcript_biotype "protein_coding";	247	3
DS499597	1549639	1549640	DS499597	1549790	1549793	AFUB_054260	.	+	ena	start_codon	0	gene_id "AFUB_054260"; transcript_id "EDP51420"; exon_number "1"; gene_source "ena"; gene_biotype "protein_coding"; transcript_source "ena"; transcript_biotype "protein_coding";	151	3
DS499597	1551927	1551928	DS499597	1551989	1551992	AFUB_054270	.	+	ena	start_codon	0	gene_id "AFUB_054270"; transcript_id "EDP51421"; exon_number "1"; gene_source "ena"; gene_biotype "protein_coding"; transcript_source "ena"; transcript_biotype "protein_coding";	62	3
DS499597	1571742	1571743	DS499597	1571918	1571921	AFUB_054330	.	+	ena	start_codon	0	gene_id "AFUB_054330"; transcript_id "EDP51427"; exon_number "1"; gene_source "ena"; gene_biotype "protein_coding"; transcript_source "ena"; transcript_biotype "protein_coding";	176	3
DS499597	1634542	1634543	DS499597	1634701	1634704	AFUB_054560	.	+	ena	start_codon	0	gene_id "AFUB_054560"; transcript_id "EDP51448"; exon_number "1"; gene_source "ena"; gene_biotype "protein_coding"; transcript_source "ena"; transcript_biotype "protein_coding";	159	3
DS499597	1638184	1638185	DS499597	1638597	1638600	AFUB_054580	.	+	ena	start_codon	0	gene_id "AFUB_054580"; transcript_id "EDP51450"; exon_number "1"; gene_source "ena"; gene_biotype "protein_coding"; transcript_source "ena"; transcript_biotype "protein_coding";	413	3
DS499597	1646752	1646753	DS499597	1646783	1646786	AFUB_054620	.	+	ena	start_codon	0	gene_id "AFUB_054620"; transcript_id "EDP51454"; exon_number "1"; gene_source "ena"; gene_biotype "protein_coding"; transcript_source "ena"; transcript_biotype "protein_coding";	31	3
DS499597	1669217	1669218	DS499597	1669488	1669491	AFUB_054680	.	+	ena	start_codon	0	gene_id "AFUB_054680"; transcript_id "EDP51460"; exon_number "1"; gene_source "ena"; gene_biotype "protein_coding"; transcript_source "ena"; transcript_biotype "protein_coding";	271	3
DS499597	1671573	1671574	DS499597	1671871	1671874	AFUB_054690	.	+	ena	start_codon	0	gene_id "AFUB_054690"; transcript_id "EDP51461"; exon_number "1"; gene_source "ena"; gene_biotype "protein_coding"; transcript_source "ena"; transcript_biotype "protein_coding";	298	3
DS499597	1676599	1676600	DS499597	1676816	1676819	AFUB_054710	.	+	ena	start_codon	0	gene_id "AFUB_054710"; transcript_id "EDP51463"; exon_number "1"; gene_source "ena"; gene_biotype "protein_coding"; transcript_source "ena"; transcript_biotype "protein_coding";	217	3
DS499597	1714364	1714365	DS499597	1714423	1714426	AFUB_054850	.	+	ena	start_codon	0	gene_id "AFUB_054850"; transcript_id "EDP51477"; exon_number "1"; gene_source "ena"; gene_biotype "protein_coding"; transcript_source "ena"; transcript_biotype "protein_coding";	59	3
DS499597	1717876	1717877	DS499597	1718605	1718608	AFUB_054860	.	+	ena	start_codon	0	gene_id "AFUB_054860"; transcript_id "EDP51478"; exon_number "1"; gene_source "ena"; gene_biotype "protein_coding"; transcript_source "ena"; transcript_biotype "protein_coding";	729	3
DS499597	1718312	1718313	DS499597	1718605	1718608	AFUB_054860	.	+	ena	start_codon	0	gene_id "AFUB_054860"; transcript_id "EDP51478"; exon_number "1"; gene_source "ena"; gene_biotype "protein_coding"; transcript_source "ena"; transcript_biotype "protein_coding";	293	3
DS499597	1726973	1726974	DS499597	1727307	1727310	AFUB_054890	.	+	ena	start_codon	0	gene_id "AFUB_054890"; transcript_id "EDP51481"; exon_number "1"; gene_source "ena"; gene_biotype "protein_coding"; transcript_source "ena"; transcript_biotype "protein_coding";	334	3
DS499597	1727277	1727278	DS499597	1727307	1727310	AFUB_054890	.	+	ena	start_codon	0	gene_id "AFUB_054890"; transcript_id "EDP51481"; exon_number "1"; gene_source "ena"; gene_biotype "protein_coding"; transcript_source "ena"; transcript_biotype "protein_coding";	30	3
DS499597	1743968	1743969	DS499597	1744109	1744112	AFUB_054930	.	+	ena	start_codon	0	gene_id "AFUB_054930"; transcript_id "EDP51485"; exon_number "1"; gene_source "ena"; gene_biotype "protein_coding"; transcript_source "ena"; transcript_biotype "protein_coding";	141	3
DS499597	1754408	1754409	DS499597	1754685	1754688	AFUB_054980	.	+	ena	start_codon	0	gene_id "AFUB_054980"; transcript_id "EDP51490"; exon_number "1"; gene_source "ena"; gene_biotype "protein_coding"; transcript_source "ena"; transcript_biotype "protein_coding";	277	3
DS499597	1771479	1771480	DS499597	1770895	1772230	AFUB_055030	.	+	ena	gene	.	gene_id "AFUB_055030"; gene_source "ena"; gene_biotype "protein_coding";	0	3
DS499597	1827558	1827559	DS499597	1827612	1827615	AFUB_055250	.	+	ena	start_codon	0	gene_id "AFUB_055250"; transcript_id "EDP51516"; exon_number "1"; gene_source "ena"; gene_biotype "protein_coding"; transcript_source "ena"; transcript_biotype "protein_coding";	54	3
DS499597	1830335	1830336	DS499597	1830580	1830583	AFUB_055260	.	+	ena	start_codon	0	gene_id "AFUB_055260"; transcript_id "EDP51517"; exon_number "1"; gene_source "ena"; gene_biotype "protein_coding"; transcript_source "ena"; transcript_biotype "protein_coding";	245	3
DS499597	1834310	1834311	DS499597	1834482	1834485	AFUB_055280	.	+	ena	start_codon	0	gene_id "AFUB_055280"; transcript_id "EDP51519"; exon_number "1"; gene_source "ena"; gene_biotype "protein_coding"; transcript_source "ena"; transcript_biotype "protein_coding";	172	3
DS499597	1838954	1838955	DS499597	1839127	1839130	AFUB_055300	.	+	ena	start_codon	0	gene_id "AFUB_055300"; transcript_id "EDP51521"; exon_number "1"; gene_source "ena"; gene_biotype "protein_coding"; transcript_source "ena"; transcript_biotype "protein_coding";	173	3
DS499597	1854006	1854007	DS499597	1853768	1856474	AFUB_055330	.	+	ena	gene	.	gene_id "AFUB_055330"; gene_source "ena"; gene_biotype "protein_coding";	0	3
DS499597	1886072	1886073	DS499597	1885273	1887501	AFUB_055450	.	+	ena	gene	.	gene_id "AFUB_055450"; gene_source "ena"; gene_biotype "protein_coding";	0	3
DS499597	1888063	1888064	DS499597	1888134	1888137	AFUB_055460	.	+	ena	start_codon	0	gene_id "AFUB_055460"; transcript_id "EDP51536"; exon_number "1"; gene_source "ena"; gene_biotype "protein_coding"; transcript_source "ena"; transcript_biotype "protein_coding";	71	3
DS499597	1917729	1917730	DS499597	1918790	1918793	AFUB_055510	.	+	ena	start_codon	0	gene_id "AFUB_055510"; transcript_id "EDP51541"; exon_number "1"; gene_source "ena"; gene_biotype "protein_coding"; transcript_source "ena"; transcript_biotype "protein_coding";	1061	3
DS499597	1921290	1921291	DS499597	1921895	1921898	AFUB_055530	.	+	ena	start_codon	0	gene_id "AFUB_055530"; transcript_id "EDP51543"; exon_number "1"; gene_source "ena"; gene_biotype "protein_coding"; transcript_source "ena"; transcript_biotype "protein_coding";	605	3
DS499597	1926335	1926336	DS499597	1926593	1926596	AFUB_055540	.	+	ena	start_codon	0	gene_id "AFUB_055540"; transcript_id "EDP51544"; exon_number "1"; gene_source "ena"; gene_biotype "protein_coding"; transcript_source "ena"; transcript_biotype "protein_coding";	258	3
DS499597	1929390	1929391	DS499597	1930832	1930835	AFUB_055550	.	+	ena	start_codon	0	gene_id "AFUB_055550"; transcript_id "EDP51545"; exon_number "1"; gene_source "ena"; gene_biotype "protein_coding"; transcript_source "ena"; transcript_biotype "protein_coding";	1442	3
DS499597	1942983	1942984	DS499597	1943008	1943011	AFUB_055590	.	+	ena	start_codon	0	gene_id "AFUB_055590"; transcript_id "EDP51549"; exon_number "1"; gene_source "ena"; gene_biotype "protein_coding"; transcript_source "ena"; transcript_biotype "protein_coding";	25	3
DS499597	1954595	1954596	DS499597	1954854	1954857	AFUB_055650	.	+	ena	start_codon	0	gene_id "AFUB_055650"; transcript_id "EDP51555"; exon_number "1"; gene_source "ena"; gene_biotype "protein_coding"; transcript_source "ena"; transcript_biotype "protein_coding";	259	3
DS499597	1969430	1969431	DS499597	1969532	1969535	AFUB_055700	.	+	ena	start_codon	0	gene_id "AFUB_055700"; transcript_id "EDP51560"; exon_number "1"; gene_source "ena"; gene_biotype "protein_coding"; transcript_source "ena"; transcript_biotype "protein_coding";	102	3
DS499597	2002298	2002299	DS499597	2002330	2002333	AFUB_055830	.	+	ena	start_codon	0	gene_id "AFUB_055830"; transcript_id "EDP51573"; exon_number "1"; gene_source "ena"; gene_biotype "protein_coding"; transcript_source "ena"; transcript_biotype "protein_coding";	32	3
DS499597	2009825	2009826	DS499597	2010510	2010513	AFUB_055860	.	+	ena	start_codon	0	gene_id "AFUB_055860"; transcript_id "EDP51576"; exon_number "1"; gene_source "ena"; gene_biotype "protein_coding"; transcript_source "ena"; transcript_biotype "protein_coding";	685	3
DS499597	2010366	2010367	DS499597	2010510	2010513	AFUB_055860	.	+	ena	start_codon	0	gene_id "AFUB_055860"; transcript_id "EDP51576"; exon_number "1"; gene_source "ena"; gene_biotype "protein_coding"; transcript_source "ena"; transcript_biotype "protein_coding";	144	3
DS499597	2021589	2021590	DS499597	2021920	2021923	AFUB_055910	.	+	ena	start_codon	0	gene_id "AFUB_055910"; transcript_id "EDP51580"; exon_number "1"; gene_source "ena"; gene_biotype "protein_coding"; transcript_source "ena"; transcript_biotype "protein_coding";	331	3
DS499597	2026119	2026120	DS499597	2026397	2026400	AFUB_055930	.	+	ena	start_codon	0	gene_id "AFUB_055930"; transcript_id "EDP51582"; exon_number "1"; gene_source "ena"; gene_biotype "protein_coding"; transcript_source "ena"; transcript_biotype "protein_coding";	278	3
DS499597	2026233	2026234	DS499597	2026397	2026400	AFUB_055930	.	+	ena	start_codon	0	gene_id "AFUB_055930"; transcript_id "EDP51582"; exon_number "1"; gene_source "ena"; gene_biotype "protein_coding"; transcript_source "ena"; transcript_biotype "protein_coding";	164	3
DS499597	2056437	2056438	DS499597	2056757	2056760	AFUB_056040	.	+	ena	start_codon	0	gene_id "AFUB_056040"; transcript_id "EDP51593"; exon_number "1"; gene_source "ena"; gene_biotype "protein_coding"; transcript_source "ena"; transcript_biotype "protein_coding";	320	3
DS499597	2061311	2061312	DS499597	2061382	2061385	AFUB_056060	.	+	ena	start_codon	0	gene_id "AFUB_056060"; transcript_id "EDP51595"; exon_number "1"; gene_source "ena"; gene_biotype "protein_coding"; transcript_source "ena"; transcript_biotype "protein_coding";	71	3
DS499597	2065543	2065544	DS499597	2065911	2065914	AFUB_056080	.	+	ena	start_codon	0	gene_id "AFUB_056080"; transcript_id "EDP51597"; exon_number "1"; gene_source "ena"; gene_biotype "protein_coding"; transcript_source "ena"; transcript_biotype "protein_coding";	368	3
DS499597	2075009	2075010	DS499597	2075029	2075032	AFUB_056110	.	+	ena	start_codon	0	gene_id "AFUB_056110"; transcript_id "EDP51600"; exon_number "1"; gene_source "ena"; gene_biotype "protein_coding"; transcript_source "ena"; transcript_biotype "protein_coding";	20	3
DS499597	2081856	2081857	DS499597	2082673	2082676	AFUB_056130	.	+	ena	start_codon	0	gene_id "AFUB_056130"; transcript_id "EDP51602"; exon_number "1"; gene_source "ena"; gene_biotype "protein_coding"; transcript_source "ena"; transcript_biotype "protein_coding";	817	3
DS499597	2083625	2083626	DS499597	2083710	2083713	AFUB_056140	.	+	ena	start_codon	0	gene_id "AFUB_056140"; transcript_id "EDP51603"; exon_number "1"; gene_source "ena"; gene_biotype "protein_coding"; transcript_source "ena"; transcript_biotype "protein_coding";	85	3
DS499597	2086882	2086883	DS499597	2087080	2087083	AFUB_056150	.	+	ena	start_codon	0	gene_id "AFUB_056150"; transcript_id "EDP51604"; exon_number "1"; gene_source "ena"; gene_biotype "protein_coding"; transcript_source "ena"; transcript_biotype "protein_coding";	198	3
DS499597	2089059	2089060	DS499597	2089200	2089203	AFUB_056160	.	+	ena	start_codon	0	gene_id "AFUB_056160"; transcript_id "EDP51605"; exon_number "1"; gene_source "ena"; gene_biotype "protein_coding"; transcript_source "ena"; transcript_biotype "protein_coding";	141	3
DS499597	2098722	2098723	DS499597	2098798	2098801	AFUB_056210	.	+	ena	start_codon	0	gene_id "AFUB_056210"; transcript_id "EDP51610"; exon_number "1"; gene_source "ena"; gene_biotype "protein_coding"; transcript_source "ena"; transcript_biotype "protein_coding";	76	3
DS499597	2143929	2143930	DS499597	2145398	2145401	AFUB_056300	.	+	ena	start_codon	0	gene_id "AFUB_056300"; transcript_id "EDP51619"; exon_number "1"; gene_source "ena"; gene_biotype "protein_coding"; transcript_source "ena"; transcript_biotype "protein_coding";	1469	3
DS499597	2154697	2154698	DS499597	2154910	2154913	AFUB_056330	.	+	ena	start_codon	0	gene_id "AFUB_056330"; transcript_id "EDP51622"; exon_number "1"; gene_source "ena"; gene_biotype "protein_coding"; transcript_source "ena"; transcript_biotype "protein_coding";	213	3
DS499597	2164764	2164765	DS499597	2164633	2167022	AFUB_056360	.	+	ena	gene	.	gene_id "AFUB_056360"; gene_source "ena"; gene_biotype "protein_coding";	0	3
DS499597	2171974	2171975	DS499597	2172826	2172829	AFUB_056380	.	+	ena	start_codon	0	gene_id "AFUB_056380"; transcript_id "EDP51627"; exon_number "1"; gene_source "ena"; gene_biotype "protein_coding"; transcript_source "ena"; transcript_biotype "protein_coding";	852	3
DS499597	2180286	2180287	DS499597	2180370	2180373	AFUB_056420	.	+	ena	start_codon	0	gene_id "AFUB_056420"; transcript_id "EDP51631"; exon_number "1"; gene_source "ena"; gene_biotype "protein_coding"; transcript_source "ena"; transcript_biotype "protein_coding";	84	3
DS499597	2189565	2189566	DS499597	2189854	2189857	AFUB_056450	.	+	ena	start_codon	0	gene_id "AFUB_056450"; transcript_id "EDP51634"; exon_number "1"; gene_source "ena"; gene_biotype "protein_coding"; transcript_source "ena"; transcript_biotype "protein_coding";	289	3
DS499597	2192970	2192971	DS499597	2193138	2193141	AFUB_056470	.	+	ena	start_codon	0	gene_id "AFUB_056470"; transcript_id "EDP51636"; exon_number "1"; gene_source "ena"; gene_biotype "protein_coding"; transcript_source "ena"; transcript_biotype "protein_coding";	168	3
DS499597	2201315	2201316	DS499597	2201354	2201357	AFUB_056500	.	+	ena	start_codon	0	gene_id "AFUB_056500"; transcript_id "EDP51639"; exon_number "1"; gene_source "ena"; gene_biotype "protein_coding"; transcript_source "ena"; transcript_biotype "protein_coding";	39	3
DS499597	2203949	2203950	DS499597	2204165	2204168	AFUB_056520	.	+	ena	start_codon	0	gene_id "AFUB_056520"; transcript_id "EDP51641"; exon_number "1"; gene_source "ena"; gene_biotype "protein_coding"; transcript_source "ena"; transcript_biotype "protein_coding";	216	3
DS499597	2209837	2209838	DS499597	2210541	2210544	AFUB_056540	.	+	ena	start_codon	0	gene_id "AFUB_056540"; transcript_id "EDP51643"; exon_number "1"; gene_source "ena"; gene_biotype "protein_coding"; transcript_source "ena"; transcript_biotype "protein_coding";	704	3
DS499597	2210444	2210445	DS499597	2210541	2210544	AFUB_056540	.	+	ena	start_codon	0	gene_id "AFUB_056540"; transcript_id "EDP51643"; exon_number "1"; gene_source "ena"; gene_biotype "protein_coding"; transcript_source "ena"; transcript_biotype "protein_coding";	97	3
DS499597	2220738	2220739	DS499597	2221404	2221407	AFUB_056560	.	+	ena	start_codon	0	gene_id "AFUB_056560"; transcript_id "EDP51645"; exon_number "1"; gene_source "ena"; gene_biotype "protein_coding"; transcript_source "ena"; transcript_biotype "protein_coding";	666	3
DS499597	2266841	2266842	DS499597	2267176	2267179	AFUB_056760	.	+	ena	start_codon	0	gene_id "AFUB_056760"; transcript_id "EDP51665"; exon_number "1"; gene_source "ena"; gene_biotype "protein_coding"; transcript_source "ena"; transcript_biotype "protein_coding";	335	3
DS499597	2275847	2275848	DS499597	2275973	2275976	AFUB_056770	.	+	ena	start_codon	0	gene_id "AFUB_056770"; transcript_id "EDP51666"; exon_number "1"; gene_source "ena"; gene_biotype "protein_coding"; transcript_source "ena"; transcript_biotype "protein_coding";	126	3
DS499597	2278314	2278315	DS499597	2278744	2278747	AFUB_056780	.	+	ena	start_codon	0	gene_id "AFUB_056780"; transcript_id "EDP51667"; exon_number "1"; gene_source "ena"; gene_biotype "protein_coding"; transcript_source "ena"; transcript_biotype "protein_coding";	430	3
DS499597	2279933	2279934	DS499597	2279792	2280218	AFUB_056790	.	+	ena	CDS	0	gene_id "AFUB_056790"; transcript_id "EDP51668"; exon_number "1"; gene_source "ena"; gene_biotype "protein_coding"; transcript_source "ena"; transcript_biotype "protein_coding"; protein_id "EDP51668";	0	3
DS499597	2283386	2283387	DS499597	2283713	2283716	AFUB_056800	.	+	ena	start_codon	0	gene_id "AFUB_056800"; transcript_id "EDP51669"; exon_number "1"; gene_source "ena"; gene_biotype "protein_coding"; transcript_source "ena"; transcript_biotype "protein_coding";	327	3
DS499597	2290948	2290949	DS499597	2290976	2290979	AFUB_056830	.	+	ena	start_codon	0	gene_id "AFUB_056830"; transcript_id "EDP51672"; exon_number "1"; gene_source "ena"; gene_biotype "protein_coding"; transcript_source "ena"; transcript_biotype "protein_coding";	28	3
DS499597	2292272	2292273	DS499597	2292513	2292516	AFUB_056840	.	+	ena	start_codon	0	gene_id "AFUB_056840"; transcript_id "EDP51673"; exon_number "1"; gene_source "ena"; gene_biotype "protein_coding"; transcript_source "ena"; transcript_biotype "protein_coding";	241	3
DS499597	2303472	2303473	DS499597	2303929	2303932	AFUB_056880	.	+	ena	start_codon	0	gene_id "AFUB_056880"; transcript_id "EDP51677"; exon_number "1"; gene_source "ena"; gene_biotype "protein_coding"; transcript_source "ena"; transcript_biotype "protein_coding";	457	3
DS499597	2303688	2303689	DS499597	2303929	2303932	AFUB_056880	.	+	ena	start_codon	0	gene_id "AFUB_056880"; transcript_id "EDP51677"; exon_number "1"; gene_source "ena"; gene_biotype "protein_coding"; transcript_source "ena"; transcript_biotype "protein_coding";	241	3
DS499597	2311680	2311681	DS499597	2311741	2311744	AFUB_056920	.	+	ena	start_codon	0	gene_id "AFUB_056920"; transcript_id "EDP51681"; exon_number "1"; gene_source "ena"; gene_biotype "protein_coding"; transcript_source "ena"; transcript_biotype "protein_coding";	61	3
DS499597	2317277	2317278	DS499597	2317331	2317334	AFUB_056940	.	+	ena	start_codon	0	gene_id "AFUB_056940"; transcript_id "EDP51683"; exon_number "1"; gene_source "ena"; gene_biotype "protein_coding"; transcript_source "ena"; transcript_biotype "protein_coding";	54	3
DS499597	2351902	2351903	DS499597	2352006	2352009	AFUB_057050	.	+	ena	start_codon	0	gene_id "AFUB_057050"; transcript_id "EDP51694"; exon_number "1"; gene_source "ena"; gene_biotype "protein_coding"; transcript_source "ena"; transcript_biotype "protein_coding";	104	3
DS499597	2362337	2362338	DS499597	2362394	2362397	AFUB_057090	.	+	ena	start_codon	0	gene_id "AFUB_057090"; transcript_id "EDP51698"; exon_number "1"; gene_source "ena"; gene_biotype "protein_coding"; transcript_source "ena"; transcript_biotype "protein_coding";	57	3
DS499597	2364442	2364443	DS499597	2364719	2364722	AFUB_057100	.	+	ena	start_codon	0	gene_id "AFUB_057100"; transcript_id "EDP51699"; exon_number "1"; gene_source "ena"; gene_biotype "protein_coding"; transcript_source "ena"; transcript_biotype "protein_coding";	277	3
DS499597	2372329	2372330	DS499597	2372446	2372449	AFUB_057130	.	+	ena	start_codon	0	gene_id "AFUB_057130"; transcript_id "EDP51702"; exon_number "1"; gene_source "ena"; gene_biotype "protein_coding"; transcript_source "ena"; transcript_biotype "protein_coding";	117	3
DS499597	2417391	2417392	DS499597	2417604	2417607	AFUB_057280	.	+	ena	start_codon	0	gene_id "AFUB_057280"; transcript_id "EDP51717"; exon_number "1"; gene_source "ena"; gene_biotype "protein_coding"; transcript_source "ena"; transcript_biotype "protein_coding";	213	3
DS499597	2425124	2425125	DS499597	2425445	2425448	AFUB_057310	.	+	ena	start_codon	0	gene_id "AFUB_057310"; transcript_id "EDP51720"; exon_number "1"; gene_source "ena"; gene_biotype "protein_coding"; transcript_source "ena"; transcript_biotype "protein_coding";	321	3
DS499597	2438627	2438628	DS499597	2439103	2439106	AFUB_057390	.	+	ena	start_codon	0	gene_id "AFUB_057390"; transcript_id "EDP51725"; exon_number "1"; gene_source "ena"; gene_biotype "protein_coding"; transcript_source "ena"; transcript_biotype "protein_coding";	476	3
DS499597	2443938	2443939	DS499597	2444026	2444029	AFUB_057410	.	+	ena	start_codon	0	gene_id "AFUB_057410"; transcript_id "EDP51727"; exon_number "1"; gene_source "ena"; gene_biotype "protein_coding"; transcript_source "ena"; transcript_biotype "protein_coding";	88	3
DS499597	2454894	2454895	DS499597	2454801	2456110	AFUB_057450	.	+	ena	gene	.	gene_id "AFUB_057450"; gene_source "ena"; gene_biotype "protein_coding";	0	3
DS499597	2480123	2480124	DS499597	2480258	2480261	AFUB_057610	.	+	ena	start_codon	0	gene_id "AFUB_057610"; transcript_id "EDP51743"; exon_number "1"; gene_source "ena"; gene_biotype "protein_coding"; transcript_source "ena"; transcript_biotype "protein_coding";	135	3
DS499597	2528027	2528028	DS499597	2528013	2528616	AFUB_057850	.	+	ena	CDS	0	gene_id "AFUB_057850"; transcript_id "EDP51767"; exon_number "1"; gene_source "ena"; gene_biotype "protein_coding"; transcript_source "ena"; transcript_biotype "protein_coding"; protein_id "EDP51767";	0	3
DS499597	2607936	2607937	DS499597	2608084	2608087	AFUB_058210	.	+	ena	start_codon	0	gene_id "AFUB_058210"; transcript_id "EDP51800"; exon_number "1"; gene_source "ena"; gene_biotype "protein_coding"; transcript_source "ena"; transcript_biotype "protein_coding";	148	3
DS499597	2618650	2618651	DS499597	2618717	2618720	AFUB_058260	.	+	ena	start_codon	0	gene_id "AFUB_058260"; transcript_id "EDP51805"; exon_number "1"; gene_source "ena"; gene_biotype "protein_coding"; transcript_source "ena"; transcript_biotype "protein_coding";	67	3
DS499597	2631834	2631835	DS499597	2632269	2632272	AFUB_058300	.	+	ena	start_codon	0	gene_id "AFUB_058300"; transcript_id "EDP51809"; exon_number "1"; gene_source "ena"; gene_biotype "protein_coding"; transcript_source "ena"; transcript_biotype "protein_coding";	435	3
DS499597	2646944	2646945	DS499597	2646989	2646992	AFUB_058350	.	+	ena	start_codon	0	gene_id "AFUB_058350"; transcript_id "EDP51814"; exon_number "1"; gene_source "ena"; gene_biotype "protein_coding"; transcript_source "ena"; transcript_biotype "protein_coding";	45	3
DS499597	2650712	2650713	DS499597	2650756	2650759	AFUB_058370	.	+	ena	start_codon	0	gene_id "AFUB_058370"; transcript_id "EDP51816"; exon_number "1"; gene_source "ena"; gene_biotype "protein_coding"; transcript_source "ena"; transcript_biotype "protein_coding";	44	3
DS499597	2655003	2655004	DS499597	2655112	2655115	AFUB_058380	.	+	ena	start_codon	0	gene_id "AFUB_058380"; transcript_id "EDP51817"; exon_number "1"; gene_source "ena"; gene_biotype "protein_coding"; transcript_source "ena"; transcript_biotype "protein_coding";	109	3
DS499597	2665464	2665465	DS499597	2665621	2665624	AFUB_058430	.	+	ena	start_codon	0	gene_id "AFUB_058430"; transcript_id "EDP51822"; exon_number "1"; gene_source "ena"; gene_biotype "protein_coding"; transcript_source "ena"; transcript_biotype "protein_coding";	157	3
DS499597	2673966	2673967	DS499597	2674388	2674391	AFUB_058450	.	+	ena	start_codon	0	gene_id "AFUB_058450"; transcript_id "EDP51824"; exon_number "1"; gene_source "ena"; gene_biotype "protein_coding"; transcript_source "ena"; transcript_biotype "protein_coding";	422	3
DS499597	2697389	2697390	DS499597	2697089	2698188	AFUB_058510	.	+	ena	gene	.	gene_id "AFUB_058510"; gene_source "ena"; gene_biotype "protein_coding";	0	3
DS499597	2732178	2732179	DS499597	2732276	2732279	AFUB_058610	.	+	ena	start_codon	0	gene_id "AFUB_058610"; transcript_id "EDP51840"; exon_number "1"; gene_source "ena"; gene_biotype "protein_coding"; transcript_source "ena"; transcript_biotype "protein_coding";	98	3
DS499597	2750539	2750540	DS499597	2750895	2750898	AFUB_058710	.	+	ena	start_codon	0	gene_id "AFUB_058710"; transcript_id "EDP51850"; exon_number "1"; gene_source "ena"; gene_biotype "protein_coding"; transcript_source "ena"; transcript_biotype "protein_coding";	356	3
DS499597	2768777	2768778	DS499597	2768808	2768811	AFUB_058780	.	+	ena	start_codon	0	gene_id "AFUB_058780"; transcript_id "EDP51857"; exon_number "1"; gene_source "ena"; gene_biotype "protein_coding"; transcript_source "ena"; transcript_biotype "protein_coding";	31	3
DS499597	2785530	2785531	DS499597	2785196	2786819	AFUB_058820	.	+	ena	gene	.	gene_id "AFUB_058820"; gene_source "ena"; gene_biotype "protein_coding";	0	3
DS499597	2819828	2819829	DS499597	2820138	2820141	AFUB_058920	.	+	ena	start_codon	0	gene_id "AFUB_058920"; transcript_id "EDP51871"; exon_number "1"; gene_source "ena"; gene_biotype "protein_coding"; transcript_source "ena"; transcript_biotype "protein_coding";	310	3
DS499597	2825616	2825617	DS499597	2826031	2826034	AFUB_058940	.	+	ena	start_codon	0	gene_id "AFUB_058940"; transcript_id "EDP51874"; exon_number "1"; gene_source "ena"; gene_biotype "protein_coding"; transcript_source "ena"; transcript_biotype "protein_coding";	415	3
DS499597	2829806	2829807	DS499597	2830191	2830194	AFUB_058960	.	+	ena	start_codon	0	gene_id "AFUB_058960"; transcript_id "EDP51876"; exon_number "1"; gene_source "ena"; gene_biotype "protein_coding"; transcript_source "ena"; transcript_biotype "protein_coding";	385	3
DS499597	2844851	2844852	DS499597	2844573	2846518	AFUB_059020	.	+	ena	gene	.	gene_id "AFUB_059020"; gene_source "ena"; gene_biotype "protein_coding";	0	3
DS499597	2846838	2846839	DS499597	2846868	2846871	AFUB_059030	.	+	ena	start_codon	0	gene_id "AFUB_059030"; transcript_id "EDP51883"; exon_number "1"; gene_source "ena"; gene_biotype "protein_coding"; transcript_source "ena"; transcript_biotype "protein_coding";	30	3
DS499597	2859765	2859766	DS499597	2859580	2859804	AFUB_059090	.	+	ena	CDS	0	gene_id "AFUB_059090"; transcript_id "EDP51889"; exon_number "1"; gene_source "ena"; gene_biotype "protein_coding"; transcript_source "ena"; transcript_biotype "protein_coding"; protein_id "EDP51889";	0	3
DS499597	2865802	2865803	DS499597	2865864	2865867	AFUB_059120	.	+	ena	start_codon	0	gene_id "AFUB_059120"; transcript_id "EDP51892"; exon_number "1"; gene_source "ena"; gene_biotype "protein_coding"; transcript_source "ena"; transcript_biotype "protein_coding";	62	3
DS499597	2890107	2890108	DS499597	2890169	2890172	AFUB_059190	.	+	ena	start_codon	0	gene_id "AFUB_059190"; transcript_id "EDP51899"; exon_number "1"; gene_source "ena"; gene_biotype "protein_coding"; transcript_source "ena"; transcript_biotype "protein_coding";	62	3
DS499597	2895452	2895453	DS499597	2895564	2895567	AFUB_059210	.	+	ena	start_codon	0	gene_id "AFUB_059210"; transcript_id "EDP51901"; exon_number "1"; gene_source "ena"; gene_biotype "protein_coding"; transcript_source "ena"; transcript_biotype "protein_coding";	112	3
DS499597	2924441	2924442	DS499597	2924531	2924534	AFUB_059310	.	+	ena	start_codon	0	gene_id "AFUB_059310"; transcript_id "EDP51911"; exon_number "1"; gene_source "ena"; gene_biotype "protein_coding"; transcript_source "ena"; transcript_biotype "protein_coding";	90	3
DS499597	2929298	2929299	DS499597	2929445	2929448	AFUB_059330	.	+	ena	start_codon	0	gene_id "AFUB_059330"; transcript_id "EDP51913"; exon_number "1"; gene_source "ena"; gene_biotype "protein_coding"; transcript_source "ena"; transcript_biotype "protein_coding";	147	3
DS499597	2955282	2955283	DS499597	2955346	2955349	AFUB_059380	.	+	ena	start_codon	0	gene_id "AFUB_059380"; transcript_id "EDP51918"; exon_number "1"; gene_source "ena"; gene_biotype "protein_coding"; transcript_source "ena"; transcript_biotype "protein_coding";	64	3
DS499597	2962240	2962241	DS499597	2962439	2962442	AFUB_059400	.	+	ena	start_codon	0	gene_id "AFUB_059400"; transcript_id "EDP51920"; exon_number "1"; gene_source "ena"; gene_biotype "protein_coding"; transcript_source "ena"; transcript_biotype "protein_coding";	199	3
DS499597	2964633	2964634	DS499597	2964964	2964967	AFUB_059420	.	+	ena	start_codon	0	gene_id "AFUB_059420"; transcript_id "EDP51922"; exon_number "1"; gene_source "ena"; gene_biotype "protein_coding"; transcript_source "ena"; transcript_biotype "protein_coding";	331	3
DS499597	2968952	2968953	DS499597	2968989	2968992	AFUB_059430	.	+	ena	start_codon	0	gene_id "AFUB_059430"; transcript_id "EDP51923"; exon_number "1"; gene_source "ena"; gene_biotype "protein_coding"; transcript_source "ena"; transcript_biotype "protein_coding";	37	3
DS499597	3018874	3018875	DS499597	3019255	3019258	AFUB_059630	.	+	ena	start_codon	0	gene_id "AFUB_059630"; transcript_id "EDP51942"; exon_number "1"; gene_source "ena"; gene_biotype "protein_coding"; transcript_source "ena"; transcript_biotype "protein_coding";	381	3
DS499597	3033051	3033052	DS499597	3033577	3033580	AFUB_059670	.	+	ena	start_codon	0	gene_id "AFUB_059670"; transcript_id "EDP51946"; exon_number "1"; gene_source "ena"; gene_biotype "protein_coding"; transcript_source "ena"; transcript_biotype "protein_coding";	526	3
DS499597	3039482	3039483	DS499597	3039610	3039613	AFUB_059690	.	+	ena	start_codon	0	gene_id "AFUB_059690"; transcript_id "EDP51948"; exon_number "1"; gene_source "ena"; gene_biotype "protein_coding"; transcript_source "ena"; transcript_biotype "protein_coding";	128	3
DS499597	3046043	3046044	DS499597	3046200	3046203	AFUB_059720	.	+	ena	start_codon	0	gene_id "AFUB_059720"; transcript_id "EDP51951"; exon_number "1"; gene_source "ena"; gene_biotype "protein_coding"; transcript_source "ena"; transcript_biotype "protein_coding";	157	3
DS499597	3047700	3047701	DS499597	3047986	3047989	AFUB_059730	.	+	ena	start_codon	0	gene_id "AFUB_059730"; transcript_id "EDP51952"; exon_number "1"; gene_source "ena"; gene_biotype "protein_coding"; transcript_source "ena"; transcript_biotype "protein_coding";	286	3
DS499597	3053790	3053791	DS499597	3054295	3054298	AFUB_059750	.	+	ena	start_codon	0	gene_id "AFUB_059750"; transcript_id "EDP51954"; exon_number "1"; gene_source "ena"; gene_biotype "protein_coding"; transcript_source "ena"; transcript_biotype "protein_coding";	505	3
DS499597	3060888	3060889	DS499597	3061001	3061004	AFUB_059770	.	+	ena	start_codon	0	gene_id "AFUB_059770"; transcript_id "EDP51956"; exon_number "1"; gene_source "ena"; gene_biotype "protein_coding"; transcript_source "ena"; transcript_biotype "protein_coding";	113	3
DS499597	3062744	3062745	DS499597	3063448	3063451	AFUB_059780	.	+	ena	start_codon	0	gene_id "AFUB_059780"; transcript_id "EDP51957"; exon_number "1"; gene_source "ena"; gene_biotype "protein_coding"; transcript_source "ena"; transcript_biotype "protein_coding";	704	3
DS499597	3062989	3062990	DS499597	3063448	3063451	AFUB_059780	.	+	ena	start_codon	0	gene_id "AFUB_059780"; transcript_id "EDP51957"; exon_number "1"; gene_source "ena"; gene_biotype "protein_coding"; transcript_source "ena"; transcript_biotype "protein_coding";	459	3
DS499597	3077555	3077556	DS499597	3078098	3078101	AFUB_059860	.	+	ena	start_codon	0	gene_id "AFUB_059860"; transcript_id "EDP51961"; exon_number "1"; gene_source "ena"; gene_biotype "protein_coding"; transcript_source "ena"; transcript_biotype "protein_coding";	543	3
DS499597	3083322	3083323	DS499597	3083632	3083634	AFUB_059880	.	+	ena	five_prime_utr	.	gene_id "AFUB_059880"; transcript_id "EDP51963"; gene_source "ena"; gene_biotype "protein_coding"; transcript_source "ena"; transcript_biotype "protein_coding";	310	3
DS499597	3086629	3086630	DS499597	3086780	3086783	AFUB_059890	.	+	ena	start_codon	0	gene_id "AFUB_059890"; transcript_id "EDP51964"; exon_number "1"; gene_source "ena"; gene_biotype "protein_coding"; transcript_source "ena"; transcript_biotype "protein_coding";	151	3
DS499597	3120825	3120826	DS499597	3120957	3120960	AFUB_060070	.	+	ena	start_codon	0	gene_id "AFUB_060070"; transcript_id "EDP51977"; exon_number "1"; gene_source "ena"; gene_biotype "protein_coding"; transcript_source "ena"; transcript_biotype "protein_coding";	132	3
DS499597	3123874	3123875	DS499597	3123927	3123930	AFUB_060090	.	+	ena	start_codon	0	gene_id "AFUB_060090"; transcript_id "EDP51979"; exon_number "1"; gene_source "ena"; gene_biotype "protein_coding"; transcript_source "ena"; transcript_biotype "protein_coding";	53	3
DS499597	3157441	3157442	DS499597	3157777	3157780	AFUB_060210	.	+	ena	start_codon	0	gene_id "AFUB_060210"; transcript_id "EDP51991"; exon_number "1"; gene_source "ena"; gene_biotype "protein_coding"; transcript_source "ena"; transcript_biotype "protein_coding";	336	3
DS499597	3161576	3161577	DS499597	3161662	3161665	AFUB_060230	.	+	ena	start_codon	0	gene_id "AFUB_060230"; transcript_id "EDP51993"; exon_number "1"; gene_source "ena"; gene_biotype "protein_coding"; transcript_source "ena"; transcript_biotype "protein_coding";	86	3
DS499597	3162673	3162674	DS499597	3162953	3162956	AFUB_060240	.	+	ena	start_codon	0	gene_id "AFUB_060240"; transcript_id "EDP51994"; exon_number "1"; gene_source "ena"; gene_biotype "protein_coding"; transcript_source "ena"; transcript_biotype "protein_coding";	280	3
DS499597	3202504	3202505	DS499597	3203124	3203127	AFUB_060350	.	+	ena	start_codon	0	gene_id "AFUB_060350"; transcript_id "EDP52005"; exon_number "1"; gene_source "ena"; gene_biotype "protein_coding"; transcript_source "ena"; transcript_biotype "protein_coding";	620	3
DS499597	3250685	3250686	DS499597	3250760	3250763	AFUB_060410	.	+	ena	start_codon	0	gene_id "AFUB_060410"; transcript_id "EDP52011"; exon_number "1"; gene_source "ena"; gene_biotype "protein_coding"; transcript_source "ena"; transcript_biotype "protein_coding";	75	3
DS499597	3261555	3261556	DS499597	3261596	3261599	AFUB_060450	.	+	ena	start_codon	0	gene_id "AFUB_060450"; transcript_id "EDP52015"; exon_number "1"; gene_source "ena"; gene_biotype "protein_coding"; transcript_source "ena"; transcript_biotype "protein_coding";	41	3
DS499597	3266025	3266026	DS499597	3266081	3266084	AFUB_060480	.	+	ena	start_codon	0	gene_id "AFUB_060480"; transcript_id "EDP52018"; exon_number "1"; gene_source "ena"; gene_biotype "protein_coding"; transcript_source "ena"; transcript_biotype "protein_coding";	56	3
DS499597	3291374	3291375	DS499597	3291473	3291476	AFUB_060610	.	+	ena	start_codon	0	gene_id "AFUB_060610"; transcript_id "EDP52027"; exon_number "1"; gene_source "ena"; gene_biotype "protein_coding"; transcript_source "ena"; transcript_biotype "protein_coding";	99	3
DS499597	3297186	3297187	DS499597	3297232	3297235	AFUB_060630	.	+	ena	start_codon	0	gene_id "AFUB_060630"; transcript_id "EDP52029"; exon_number "1"; gene_source "ena"; gene_biotype "protein_coding"; transcript_source "ena"; transcript_biotype "protein_coding";	46	3
DS499597	3301250	3301251	DS499597	3301267	3301270	AFUB_060650	.	+	ena	start_codon	0	gene_id "AFUB_060650"; transcript_id "EDP52031"; exon_number "1"; gene_source "ena"; gene_biotype "protein_coding"; transcript_source "ena"; transcript_biotype "protein_coding";	17	3
DS499597	3368396	3368397	DS499597	3368438	3368441	AFUB_060890	.	+	ena	start_codon	0	gene_id "AFUB_060890"; transcript_id "EDP52055"; exon_number "1"; gene_source "ena"; gene_biotype "protein_coding"; transcript_source "ena"; transcript_biotype "protein_coding";	42	3
DS499597	3372499	3372500	DS499597	3373339	3373342	AFUB_060900	.	+	ena	start_codon	0	gene_id "AFUB_060900"; transcript_id "EDP52056"; exon_number "1"; gene_source "ena"; gene_biotype "protein_coding"; transcript_source "ena"; transcript_biotype "protein_coding";	840	3
DS499597	3398150	3398151	DS499597	3398494	3398497	AFUB_060980	.	+	ena	start_codon	0	gene_id "AFUB_060980"; transcript_id "EDP52064"; exon_number "1"; gene_source "ena"; gene_biotype "protein_coding"; transcript_source "ena"; transcript_biotype "protein_coding";	344	3
DS499597	3401483	3401484	DS499597	3401606	3401609	AFUB_060990	.	+	ena	start_codon	0	gene_id "AFUB_060990"; transcript_id "EDP52065"; exon_number "1"; gene_source "ena"; gene_biotype "protein_coding"; transcript_source "ena"; transcript_biotype "protein_coding";	123	3
DS499597	3417198	3417199	DS499597	3417348	3417351	AFUB_061040	.	+	ena	start_codon	0	gene_id "AFUB_061040"; transcript_id "EDP52070"; exon_number "1"; gene_source "ena"; gene_biotype "protein_coding"; transcript_source "ena"; transcript_biotype "protein_coding";	150	3
DS499597	3430722	3430723	DS499597	3430767	3430770	AFUB_061090	.	+	ena	start_codon	0	gene_id "AFUB_061090"; transcript_id "EDP52075"; exon_number "1"; gene_source "ena"; gene_biotype "protein_coding"; transcript_source "ena"; transcript_biotype "protein_coding";	45	3
DS499597	3437376	3437377	DS499597	3437590	3437617	AFUB_061110	.	+	ena	five_prime_utr	.	gene_id "AFUB_061110"; transcript_id "EDP52077"; gene_source "ena"; gene_biotype "protein_coding"; transcript_source "ena"; transcript_biotype "protein_coding";	214	3
DS499597	3445360	3445361	DS499597	3445442	3445445	AFUB_061150	.	+	ena	start_codon	0	gene_id "AFUB_061150"; transcript_id "EDP52081"; exon_number "1"; gene_source "ena"; gene_biotype "protein_coding"; transcript_source "ena"; transcript_biotype "protein_coding";	82	3
DS499597	3451953	3451954	DS499597	3451987	3451990	AFUB_061190	.	+	ena	start_codon	0	gene_id "AFUB_061190"; transcript_id "EDP52085"; exon_number "1"; gene_source "ena"; gene_biotype "protein_coding"; transcript_source "ena"; transcript_biotype "protein_coding";	34	3
DS499597	3482439	3482440	DS499597	3482538	3482541	AFUB_061320	.	+	ena	start_codon	0	gene_id "AFUB_061320"; transcript_id "EDP52098"; exon_number "1"; gene_source "ena"; gene_biotype "protein_coding"; transcript_source "ena"; transcript_biotype "protein_coding";	99	3
DS499597	3513696	3513697	DS499597	3513838	3513841	AFUB_061440	.	+	ena	start_codon	0	gene_id "AFUB_061440"; transcript_id "EDP52108"; exon_number "1"; gene_source "ena"; gene_biotype "protein_coding"; transcript_source "ena"; transcript_biotype "protein_coding";	142	3
DS499597	3526877	3526878	DS499597	3526930	3526933	AFUB_061490	.	+	ena	start_codon	0	gene_id "AFUB_061490"; transcript_id "EDP52113"; exon_number "1"; gene_source "ena"; gene_biotype "protein_coding"; transcript_source "ena"; transcript_biotype "protein_coding";	53	3
DS499597	3551336	3551337	DS499597	3551440	3551443	AFUB_061630	.	+	ena	start_codon	0	gene_id "AFUB_061630"; transcript_id "EDP52126"; exon_number "1"; gene_source "ena"; gene_biotype "protein_coding"; transcript_source "ena"; transcript_biotype "protein_coding";	104	3
DS499597	3553047	3553048	DS499597	3553291	3553294	AFUB_061640	.	+	ena	start_codon	0	gene_id "AFUB_061640"; transcript_id "EDP52127"; exon_number "1"; gene_source "ena"; gene_biotype "protein_coding"; transcript_source "ena"; transcript_biotype "protein_coding";	244	3
DS499597	3583786	3583787	DS499597	3584100	3584103	AFUB_061740	.	+	ena	start_codon	0	gene_id "AFUB_061740"; transcript_id "EDP52137"; exon_number "1"; gene_source "ena"; gene_biotype "protein_coding"; transcript_source "ena"; transcript_biotype "protein_coding";	314	3
DS499597	3611826	3611827	DS499597	3611973	3611976	AFUB_061900	.	+	ena	start_codon	0	gene_id "AFUB_061900"; transcript_id "EDP52152"; exon_number "1"; gene_source "ena"; gene_biotype "protein_coding"; transcript_source "ena"; transcript_biotype "protein_coding";	147	3
DS499597	3707407	3707408	DS499597	3707518	3707521	AFUB_062340	.	+	ena	start_codon	0	gene_id "AFUB_062340"; transcript_id "EDP52195"; exon_number "1"; gene_source "ena"; gene_biotype "protein_coding"; transcript_source "ena"; transcript_biotype "protein_coding";	111	3
DS499597	3709172	3709173	DS499597	3709248	3709251	AFUB_062350	.	+	ena	start_codon	0	gene_id "AFUB_062350"; transcript_id "EDP52196"; exon_number "1"; gene_source "ena"; gene_biotype "protein_coding"; transcript_source "ena"; transcript_biotype "protein_coding";	76	3
DS499597	3731789	3731790	DS499597	3731947	3731950	AFUB_062460	.	+	ena	start_codon	0	gene_id "AFUB_062460"; transcript_id "EDP52207"; exon_number "1"; gene_source "ena"; gene_biotype "protein_coding"; transcript_source "ena"; transcript_biotype "protein_coding";	158	3
DS499598	33359	33360	DS499598	33457	33460	AFUB_062900	.	+	ena	start_codon	0	gene_id "AFUB_062900"; transcript_id "EDP49958"; exon_number "1"; gene_source "ena"; gene_biotype "protein_coding"; transcript_source "ena"; transcript_biotype "protein_coding";	98	3
DS499598	45849	45850	DS499598	45931	45934	AFUB_062950	.	+	ena	start_codon	0	gene_id "AFUB_062950"; transcript_id "EDP49963"; exon_number "1"; gene_source "ena"; gene_biotype "protein_coding"; transcript_source "ena"; transcript_biotype "protein_coding";	82	3
DS499598	53764	53765	DS499598	53819	53822	AFUB_062990	.	+	ena	start_codon	0	gene_id "AFUB_062990"; transcript_id "EDP49967"; exon_number "1"; gene_source "ena"; gene_biotype "protein_coding"; transcript_source "ena"; transcript_biotype "protein_coding";	55	3
DS499598	57827	57828	DS499598	58153	58156	AFUB_063020	.	+	ena	start_codon	0	gene_id "AFUB_063020"; transcript_id "EDP49970"; exon_number "1"; gene_source "ena"; gene_biotype "protein_coding"; transcript_source "ena"; transcript_biotype "protein_coding";	326	3
DS499598	70845	70846	DS499598	70931	70934	AFUB_063100	.	+	ena	start_codon	0	gene_id "AFUB_063100"; transcript_id "EDP49978"; exon_number "1"; gene_source "ena"; gene_biotype "protein_coding"; transcript_source "ena"; transcript_biotype "protein_coding";	86	3
DS499598	73187	73188	DS499598	73299	73302	AFUB_063120	.	+	ena	start_codon	0	gene_id "AFUB_063120"; transcript_id "EDP49980"; exon_number "1"; gene_source "ena"; gene_biotype "protein_coding"; transcript_source "ena"; transcript_biotype "protein_coding";	112	3
DS499598	104961	104962	DS499598	105063	105066	AFUB_063190	.	+	ena	start_codon	0	gene_id "AFUB_063190"; transcript_id "EDP49987"; exon_number "1"; gene_source "ena"; gene_biotype "protein_coding"; transcript_source "ena"; transcript_biotype "protein_coding";	102	3
DS499598	127420	127421	DS499598	127502	127505	AFUB_063280	.	+	ena	start_codon	0	gene_id "AFUB_063280"; transcript_id "EDP49996"; exon_number "1"; gene_source "ena"; gene_biotype "protein_coding"; transcript_source "ena"; transcript_biotype "protein_coding";	82	3
DS499598	135903	135904	DS499598	136080	136083	AFUB_063290	.	+	ena	start_codon	0	gene_id "AFUB_063290"; transcript_id "EDP49997"; exon_number "1"; gene_source "ena"; gene_biotype "protein_coding"; transcript_source "ena"; transcript_biotype "protein_coding";	177	3
DS499598	148941	148942	DS499598	149050	149053	AFUB_063330	.	+	ena	start_codon	0	gene_id "AFUB_063330"; transcript_id "EDP50001"; exon_number "1"; gene_source "ena"; gene_biotype "protein_coding"; transcript_source "ena"; transcript_biotype "protein_coding";	109	3
DS499598	150353	150354	DS499598	150391	150394	AFUB_063340	.	+	ena	start_codon	0	gene_id "AFUB_063340"; transcript_id "EDP50002"; exon_number "1"; gene_source "ena"; gene_biotype "protein_coding"; transcript_source "ena"; transcript_biotype "protein_coding";	38	3
DS499598	156392	156393	DS499598	156432	156435	AFUB_063360	.	+	ena	start_codon	0	gene_id "AFUB_063360"; transcript_id "EDP50004"; exon_number "1"; gene_source "ena"; gene_biotype "protein_coding"; transcript_source "ena"; transcript_biotype "protein_coding";	40	3
DS499598	171722	171723	DS499598	171809	171812	AFUB_063440	.	+	ena	start_codon	0	gene_id "AFUB_063440"; transcript_id "EDP50012"; exon_number "1"; gene_source "ena"; gene_biotype "protein_coding"; transcript_source "ena"; transcript_biotype "protein_coding";	87	3
DS499598	184845	184846	DS499598	185387	185390	AFUB_063510	.	+	ena	start_codon	0	gene_id "AFUB_063510"; transcript_id "EDP50019"; exon_number "1"; gene_source "ena"; gene_biotype "protein_coding"; transcript_source "ena"; transcript_biotype "protein_coding";	542	3
DS499598	187041	187042	DS499598	187104	187107	AFUB_063520	.	+	ena	start_codon	0	gene_id "AFUB_063520"; transcript_id "EDP50020"; exon_number "1"; gene_source "ena"; gene_biotype "protein_coding"; transcript_source "ena"; transcript_biotype "protein_coding";	63	3
DS499598	231802	231803	DS499598	232333	232336	AFUB_063640	.	+	ena	start_codon	0	gene_id "AFUB_063640"; transcript_id "EDP50033"; exon_number "1"; gene_source "ena"; gene_biotype "protein_coding"; transcript_source "ena"; transcript_biotype "protein_coding";	531	3
DS499598	259321	259322	DS499598	259436	259439	AFUB_063700	.	+	ena	start_codon	0	gene_id "AFUB_063700"; transcript_id "EDP50039"; exon_number "1"; gene_source "ena"; gene_biotype "protein_coding"; transcript_source "ena"; transcript_biotype "protein_coding";	115	3
DS499598	286759	286760	DS499598	286935	286938	AFUB_063810	.	+	ena	start_codon	0	gene_id "AFUB_063810"; transcript_id "EDP50050"; exon_number "1"; gene_source "ena"; gene_biotype "protein_coding"; transcript_source "ena"; transcript_biotype "protein_coding";	176	3
DS499598	302327	302328	DS499598	302656	302659	AFUB_063860	.	+	ena	start_codon	0	gene_id "AFUB_063860"; transcript_id "EDP50055"; exon_number "1"; gene_source "ena"; gene_biotype "protein_coding"; transcript_source "ena"; transcript_biotype "protein_coding";	329	3
DS499598	308897	308898	DS499598	309388	309391	AFUB_063890	.	+	ena	start_codon	0	gene_id "AFUB_063890"; transcript_id "EDP50058"; exon_number "1"; gene_source "ena"; gene_biotype "protein_coding"; transcript_source "ena"; transcript_biotype "protein_coding";	491	3
DS499598	308969	308970	DS499598	309388	309391	AFUB_063890	.	+	ena	start_codon	0	gene_id "AFUB_063890"; transcript_id "EDP50058"; exon_number "1"; gene_source "ena"; gene_biotype "protein_coding"; transcript_source "ena"; transcript_biotype "protein_coding";	419	3
DS499598	334137	334138	DS499598	334192	334195	AFUB_063970	.	+	ena	start_codon	0	gene_id "AFUB_063970"; transcript_id "EDP50066"; exon_number "1"; gene_source "ena"; gene_biotype "protein_coding"; transcript_source "ena"; transcript_biotype "protein_coding";	55	3
DS499598	337179	337180	DS499598	337255	337258	AFUB_063980	.	+	ena	start_codon	0	gene_id "AFUB_063980"; transcript_id "EDP50067"; exon_number "1"; gene_source "ena"; gene_biotype "protein_coding"; transcript_source "ena"; transcript_biotype "protein_coding";	76	3
DS499598	340757	340758	DS499598	340823	340826	AFUB_064000	.	+	ena	start_codon	0	gene_id "AFUB_064000"; transcript_id "EDP50069"; exon_number "1"; gene_source "ena"; gene_biotype "protein_coding"; transcript_source "ena"; transcript_biotype "protein_coding";	66	3
DS499598	342867	342868	DS499598	342790	343189	AFUB_064010	.	+	ena	CDS	0	gene_id "AFUB_064010"; transcript_id "EDP50070"; exon_number "1"; gene_source "ena"; gene_biotype "protein_coding"; transcript_source "ena"; transcript_biotype "protein_coding"; protein_id "EDP50070";	0	3
DS499598	347699	347700	DS499598	347910	347913	AFUB_064030	.	+	ena	start_codon	0	gene_id "AFUB_064030"; transcript_id "EDP50072"; exon_number "1"; gene_source "ena"; gene_biotype "protein_coding"; transcript_source "ena"; transcript_biotype "protein_coding";	211	3
DS499598	369585	369586	DS499598	369832	369835	AFUB_064120	.	+	ena	start_codon	0	gene_id "AFUB_064120"; transcript_id "EDP50080"; exon_number "1"; gene_source "ena"; gene_biotype "protein_coding"; transcript_source "ena"; transcript_biotype "protein_coding";	247	3
DS499598	369596	369597	DS499598	369832	369835	AFUB_064120	.	+	ena	start_codon	0	gene_id "AFUB_064120"; transcript_id "EDP50080"; exon_number "1"; gene_source "ena"; gene_biotype "protein_coding"; transcript_source "ena"; transcript_biotype "protein_coding";	236	3
DS499598	372852	372853	DS499598	373192	373195	AFUB_064130	.	+	ena	start_codon	0	gene_id "AFUB_064130"; transcript_id "EDP50081"; exon_number "1"; gene_source "ena"; gene_biotype "protein_coding"; transcript_source "ena"; transcript_biotype "protein_coding";	340	3
DS499598	372859	372860	DS499598	373192	373195	AFUB_064130	.	+	ena	start_codon	0	gene_id "AFUB_064130"; transcript_id "EDP50081"; exon_number "1"; gene_source "ena"; gene_biotype "protein_coding"; transcript_source "ena"; transcript_biotype "protein_coding";	333	3
DS499598	378972	378973	DS499598	379068	379071	AFUB_064160	.	+	ena	start_codon	0	gene_id "AFUB_064160"; transcript_id "EDP50084"; exon_number "1"; gene_source "ena"; gene_biotype "protein_coding"; transcript_source "ena"; transcript_biotype "protein_coding";	96	3
DS499598	396416	396417	DS499598	396459	396462	AFUB_064200	.	+	ena	start_codon	0	gene_id "AFUB_064200"; transcript_id "EDP50088"; exon_number "1"; gene_source "ena"; gene_biotype "protein_coding"; transcript_source "ena"; transcript_biotype "protein_coding";	43	3
DS499598	398846	398847	DS499598	398904	398907	AFUB_064220	.	+	ena	start_codon	0	gene_id "AFUB_064220"; transcript_id "EDP50090"; exon_number "1"; gene_source "ena"; gene_biotype "protein_coding"; transcript_source "ena"; transcript_biotype "protein_coding";	58	3
DS499598	410068	410069	DS499598	410270	410273	AFUB_064260	.	+	ena	start_codon	0	gene_id "AFUB_064260"; transcript_id "EDP50094"; exon_number "1"; gene_source "ena"; gene_biotype "protein_coding"; transcript_source "ena"; transcript_biotype "protein_coding";	202	3
DS499598	420750	420751	DS499598	420847	420850	AFUB_064310	.	+	ena	start_codon	0	gene_id "AFUB_064310"; transcript_id "EDP50099"; exon_number "1"; gene_source "ena"; gene_biotype "protein_coding"; transcript_source "ena"; transcript_biotype "protein_coding";	97	3
DS499598	428512	428513	DS499598	428673	428676	AFUB_064340	.	+	ena	start_codon	0	gene_id "AFUB_064340"; transcript_id "EDP50102"; exon_number "1"; gene_source "ena"; gene_biotype "protein_coding"; transcript_source "ena"; transcript_biotype "protein_coding";	161	3
DS499598	439539	439540	DS499598	440209	440212	AFUB_064370	.	+	ena	start_codon	0	gene_id "AFUB_064370"; transcript_id "EDP50105"; exon_number "1"; gene_source "ena"; gene_biotype "protein_coding"; transcript_source "ena"; transcript_biotype "protein_coding";	670	3
DS499598	444478	444479	DS499598	444523	444526	AFUB_064380	.	+	ena	start_codon	0	gene_id "AFUB_064380"; transcript_id "EDP50106"; exon_number "1"; gene_source "ena"; gene_biotype "protein_coding"; transcript_source "ena"; transcript_biotype "protein_coding";	45	3
DS499598	469419	469420	DS499598	469489	469492	AFUB_064480	.	+	ena	start_codon	0	gene_id "AFUB_064480"; transcript_id "EDP50116"; exon_number "1"; gene_source "ena"; gene_biotype "protein_coding"; transcript_source "ena"; transcript_biotype "protein_coding";	70	3
DS499598	469429	469430	DS499598	469489	469492	AFUB_064480	.	+	ena	start_codon	0	gene_id "AFUB_064480"; transcript_id "EDP50116"; exon_number "1"; gene_source "ena"; gene_biotype "protein_coding"; transcript_source "ena"; transcript_biotype "protein_coding";	60	3
DS499598	498696	498697	DS499598	498501	499641	AFUB_064600	.	+	ena	gene	.	gene_id "AFUB_064600"; gene_source "ena"; gene_biotype "protein_coding";	0	3
DS499598	498705	498706	DS499598	498501	499641	AFUB_064600	.	+	ena	gene	.	gene_id "AFUB_064600"; gene_source "ena"; gene_biotype "protein_coding";	0	3
DS499598	499955	499956	DS499598	500005	500008	AFUB_064610	.	+	ena	start_codon	0	gene_id "AFUB_064610"; transcript_id "EDP50129"; exon_number "1"; gene_source "ena"; gene_biotype "protein_coding"; transcript_source "ena"; transcript_biotype "protein_coding";	50	3
DS499598	516708	516709	DS499598	516757	516760	AFUB_064660	.	+	ena	start_codon	0	gene_id "AFUB_064660"; transcript_id "EDP50134"; exon_number "1"; gene_source "ena"; gene_biotype "protein_coding"; transcript_source "ena"; transcript_biotype "protein_coding";	49	3
DS499598	518886	518887	DS499598	518999	519002	AFUB_064670	.	+	ena	start_codon	0	gene_id "AFUB_064670"; transcript_id "EDP50135"; exon_number "1"; gene_source "ena"; gene_biotype "protein_coding"; transcript_source "ena"; transcript_biotype "protein_coding";	113	3
DS499598	521410	521411	DS499598	521492	521495	AFUB_064680	.	+	ena	start_codon	0	gene_id "AFUB_064680"; transcript_id "EDP50136"; exon_number "1"; gene_source "ena"; gene_biotype "protein_coding"; transcript_source "ena"; transcript_biotype "protein_coding";	82	3
DS499598	524288	524289	DS499598	524408	524411	AFUB_064694	.	+	ena	start_codon	0	gene_id "AFUB_064694"; transcript_id "EDP50138"; exon_number "1"; gene_source "ena"; gene_biotype "protein_coding"; transcript_source "ena"; transcript_biotype "protein_coding";	120	3
DS499598	533944	533945	DS499598	533986	533989	AFUB_064720	.	+	ena	start_codon	0	gene_id "AFUB_064720"; transcript_id "EDP50141"; exon_number "1"; gene_source "ena"; gene_biotype "protein_coding"; transcript_source "ena"; transcript_biotype "protein_coding";	42	3
DS499598	536741	536742	DS499598	536808	536811	AFUB_064740	.	+	ena	start_codon	0	gene_id "AFUB_064740"; transcript_id "EDP50143"; exon_number "1"; gene_source "ena"; gene_biotype "protein_coding"; transcript_source "ena"; transcript_biotype "protein_coding";	67	3
DS499598	539160	539161	DS499598	539634	539637	AFUB_064750	.	+	ena	start_codon	0	gene_id "AFUB_064750"; transcript_id "EDP50144"; exon_number "1"; gene_source "ena"; gene_biotype "protein_coding"; transcript_source "ena"; transcript_biotype "protein_coding";	474	3
DS499598	543579	543580	DS499598	543915	543918	AFUB_064760	.	+	ena	start_codon	0	gene_id "AFUB_064760"; transcript_id "EDP50145"; exon_number "1"; gene_source "ena"; gene_biotype "protein_coding"; transcript_source "ena"; transcript_biotype "protein_coding";	336	3
DS499598	555130	555131	DS499598	554922	560786	AFUB_064800	.	+	ena	gene	.	gene_id "AFUB_064800"; gene_source "ena"; gene_biotype "protein_coding";	0	3
DS499598	563119	563120	DS499598	563432	563435	AFUB_064810	.	+	ena	start_codon	0	gene_id "AFUB_064810"; transcript_id "EDP50149"; exon_number "1"; gene_source "ena"; gene_biotype "protein_coding"; transcript_source "ena"; transcript_biotype "protein_coding";	313	3
DS499598	573048	573049	DS499598	572842	573221	AFUB_064840	.	+	ena	CDS	0	gene_id "AFUB_064840"; transcript_id "EDP50152"; exon_number "1"; gene_source "ena"; gene_biotype "protein_coding"; transcript_source "ena"; transcript_biotype "protein_coding"; protein_id "EDP50152";	0	3
DS499598	589084	589085	DS499598	589215	589218	AFUB_064900	.	+	ena	start_codon	0	gene_id "AFUB_064900"; transcript_id "EDP50158"; exon_number "1"; gene_source "ena"; gene_biotype "protein_coding"; transcript_source "ena"; transcript_biotype "protein_coding";	131	3
DS499598	595568	595569	DS499598	595781	595784	AFUB_064930	.	+	ena	start_codon	0	gene_id "AFUB_064930"; transcript_id "EDP50161"; exon_number "1"; gene_source "ena"; gene_biotype "protein_coding"; transcript_source "ena"; transcript_biotype "protein_coding";	213	3
DS499598	597963	597964	DS499598	598034	598037	AFUB_064950	.	+	ena	start_codon	0	gene_id "AFUB_064950"; transcript_id "EDP50163"; exon_number "1"; gene_source "ena"; gene_biotype "protein_coding"; transcript_source "ena"; transcript_biotype "protein_coding";	71	3
DS499598	616476	616477	DS499598	617241	617244	AFUB_065040	.	+	ena	start_codon	0	gene_id "AFUB_065040"; transcript_id "EDP50172"; exon_number "1"; gene_source "ena"; gene_biotype "protein_coding"; transcript_source "ena"; transcript_biotype "protein_coding";	765	3
DS499598	623418	623419	DS499598	623548	623551	AFUB_065080	.	+	ena	start_codon	0	gene_id "AFUB_065080"; transcript_id "EDP50176"; exon_number "1"; gene_source "ena"; gene_biotype "protein_coding"; transcript_source "ena"; transcript_biotype "protein_coding";	130	3
DS499598	626858	626859	DS499598	626905	626908	AFUB_065100	.	+	ena	start_codon	0	gene_id "AFUB_065100"; transcript_id "EDP50178"; exon_number "1"; gene_source "ena"; gene_biotype "protein_coding"; transcript_source "ena"; transcript_biotype "protein_coding";	47	3
DS499598	640345	640346	DS499598	640545	640548	AFUB_065150	.	+	ena	start_codon	0	gene_id "AFUB_065150"; transcript_id "EDP50183"; exon_number "1"; gene_source "ena"; gene_biotype "protein_coding"; transcript_source "ena"; transcript_biotype "protein_coding";	200	3
DS499598	662038	662039	DS499598	662117	662120	AFUB_065240	.	+	ena	start_codon	0	gene_id "AFUB_065240"; transcript_id "EDP50192"; exon_number "1"; gene_source "ena"; gene_biotype "protein_coding"; transcript_source "ena"; transcript_biotype "protein_coding";	79	3
DS499598	685442	685443	DS499598	685528	685531	AFUB_065340	.	+	ena	start_codon	0	gene_id "AFUB_065340"; transcript_id "EDP50202"; exon_number "1"; gene_source "ena"; gene_biotype "protein_coding"; transcript_source "ena"; transcript_biotype "protein_coding";	86	3
DS499598	696248	696249	DS499598	696351	696354	AFUB_065390	.	+	ena	start_codon	0	gene_id "AFUB_065390"; transcript_id "EDP50207"; exon_number "1"; gene_source "ena"; gene_biotype "protein_coding"; transcript_source "ena"; transcript_biotype "protein_coding";	103	3
DS499598	708217	708218	DS499598	708330	708333	AFUB_065440	.	+	ena	start_codon	0	gene_id "AFUB_065440"; transcript_id "EDP50212"; exon_number "1"; gene_source "ena"; gene_biotype "protein_coding"; transcript_source "ena"; transcript_biotype "protein_coding";	113	3
DS499598	712653	712654	DS499598	712724	712727	AFUB_065460	.	+	ena	start_codon	0	gene_id "AFUB_065460"; transcript_id "EDP50214"; exon_number "1"; gene_source "ena"; gene_biotype "protein_coding"; transcript_source "ena"; transcript_biotype "protein_coding";	71	3
DS499598	712656	712657	DS499598	712724	712727	AFUB_065460	.	+	ena	start_codon	0	gene_id "AFUB_065460"; transcript_id "EDP50214"; exon_number "1"; gene_source "ena"; gene_biotype "protein_coding"; transcript_source "ena"; transcript_biotype "protein_coding";	68	3
DS499598	740145	740146	DS499598	740389	740392	AFUB_065580	.	+	ena	start_codon	0	gene_id "AFUB_065580"; transcript_id "EDP50226"; exon_number "1"; gene_source "ena"; gene_biotype "protein_coding"; transcript_source "ena"; transcript_biotype "protein_coding";	244	3
DS499598	744836	744837	DS499598	745332	745335	AFUB_065590	.	+	ena	start_codon	0	gene_id "AFUB_065590"; transcript_id "EDP50227"; exon_number "1"; gene_source "ena"; gene_biotype "protein_coding"; transcript_source "ena"; transcript_biotype "protein_coding";	496	3
DS499598	747608	747609	DS499598	748126	748129	AFUB_065600	.	+	ena	start_codon	0	gene_id "AFUB_065600"; transcript_id "EDP50228"; exon_number "1"; gene_source "ena"; gene_biotype "protein_coding"; transcript_source "ena"; transcript_biotype "protein_coding";	518	3
DS499598	773159	773160	DS499598	773204	773207	AFUB_065680	.	+	ena	start_codon	0	gene_id "AFUB_065680"; transcript_id "EDP50236"; exon_number "1"; gene_source "ena"; gene_biotype "protein_coding"; transcript_source "ena"; transcript_biotype "protein_coding";	45	3
DS499598	775100	775101	DS499598	775105	775108	AFUB_065690	.	+	ena	start_codon	0	gene_id "AFUB_065690"; transcript_id "EDP50237"; exon_number "1"; gene_source "ena"; gene_biotype "protein_coding"; transcript_source "ena"; transcript_biotype "protein_coding";	5	3
DS499598	802387	802388	DS499598	802452	802455	AFUB_065770	.	+	ena	start_codon	0	gene_id "AFUB_065770"; transcript_id "EDP50245"; exon_number "1"; gene_source "ena"; gene_biotype "protein_coding"; transcript_source "ena"; transcript_biotype "protein_coding";	65	3
DS499598	813152	813153	DS499598	813206	813209	AFUB_065820	.	+	ena	start_codon	0	gene_id "AFUB_065820"; transcript_id "EDP50250"; exon_number "1"; gene_source "ena"; gene_biotype "protein_coding"; transcript_source "ena"; transcript_biotype "protein_coding";	54	3
DS499598	815669	815670	DS499598	815928	815931	AFUB_065830	.	+	ena	start_codon	0	gene_id "AFUB_065830"; transcript_id "EDP50251"; exon_number "1"; gene_source "ena"; gene_biotype "protein_coding"; transcript_source "ena"; transcript_biotype "protein_coding";	259	3
DS499598	864873	864874	DS499598	864992	864995	AFUB_066020	.	+	ena	start_codon	0	gene_id "AFUB_066020"; transcript_id "EDP50269"; exon_number "1"; gene_source "ena"; gene_biotype "protein_coding"; transcript_source "ena"; transcript_biotype "protein_coding";	119	3
DS499598	872634	872635	DS499598	872787	872790	AFUB_066050	.	+	ena	start_codon	0	gene_id "AFUB_066050"; transcript_id "EDP50272"; exon_number "1"; gene_source "ena"; gene_biotype "protein_coding"; transcript_source "ena"; transcript_biotype "protein_coding";	153	3
DS499598	876286	876287	DS499598	876406	876409	AFUB_066060	.	+	ena	start_codon	0	gene_id "AFUB_066060"; transcript_id "EDP50273"; exon_number "1"; gene_source "ena"; gene_biotype "protein_coding"; transcript_source "ena"; transcript_biotype "protein_coding";	120	3
DS499598	878771	878772	DS499598	879302	879828	AFUB_066070	.	+	ena	CDS	0	gene_id "AFUB_066070"; transcript_id "EDP50274"; exon_number "1"; gene_source "ena"; gene_biotype "protein_coding"; transcript_source "ena"; transcript_biotype "protein_coding"; protein_id "EDP50274";	531	3
DS499598	881420	881421	DS499598	881768	881771	AFUB_066080	.	+	ena	start_codon	0	gene_id "AFUB_066080"; transcript_id "EDP50275"; exon_number "1"; gene_source "ena"; gene_biotype "protein_coding"; transcript_source "ena"; transcript_biotype "protein_coding";	348	3
DS499598	887964	887965	DS499598	888104	888107	AFUB_066110	.	+	ena	start_codon	0	gene_id "AFUB_066110"; transcript_id "EDP50278"; exon_number "1"; gene_source "ena"; gene_biotype "protein_coding"; transcript_source "ena"; transcript_biotype "protein_coding";	140	3
DS499598	890949	890950	DS499598	890997	891000	AFUB_066120	.	+	ena	start_codon	0	gene_id "AFUB_066120"; transcript_id "EDP50279"; exon_number "1"; gene_source "ena"; gene_biotype "protein_coding"; transcript_source "ena"; transcript_biotype "protein_coding";	48	3
DS499598	965687	965688	DS499598	965719	965722	AFUB_066340	.	+	ena	start_codon	0	gene_id "AFUB_066340"; transcript_id "EDP50299"; exon_number "1"; gene_source "ena"; gene_biotype "protein_coding"; transcript_source "ena"; transcript_biotype "protein_coding";	32	3
DS499598	992103	992104	DS499598	991848	992523	AFUB_066440	.	+	ena	CDS	0	gene_id "AFUB_066440"; transcript_id "EDP50309"; exon_number "1"; gene_source "ena"; gene_biotype "protein_coding"; transcript_source "ena"; transcript_biotype "protein_coding"; protein_id "EDP50309";	0	3
DS499598	993503	993504	DS499598	993517	993520	AFUB_066450	.	+	ena	start_codon	0	gene_id "AFUB_066450"; transcript_id "EDP50310"; exon_number "1"; gene_source "ena"; gene_biotype "protein_coding"; transcript_source "ena"; transcript_biotype "protein_coding";	14	3
DS499598	1053303	1053304	DS499598	1053344	1053347	AFUB_066690	.	+	ena	start_codon	0	gene_id "AFUB_066690"; transcript_id "EDP50334"; exon_number "1"; gene_source "ena"; gene_biotype "protein_coding"; transcript_source "ena"; transcript_biotype "protein_coding";	41	3
DS499598	1057294	1057295	DS499598	1057478	1057481	AFUB_066700	.	+	ena	start_codon	0	gene_id "AFUB_066700"; transcript_id "EDP50335"; exon_number "1"; gene_source "ena"; gene_biotype "protein_coding"; transcript_source "ena"; transcript_biotype "protein_coding";	184	3
DS499598	1072011	1072012	DS499598	1072076	1072079	AFUB_066770	.	+	ena	start_codon	0	gene_id "AFUB_066770"; transcript_id "EDP50342"; exon_number "1"; gene_source "ena"; gene_biotype "protein_coding"; transcript_source "ena"; transcript_biotype "protein_coding";	65	3
DS499598	1090349	1090350	DS499598	1090453	1090456	AFUB_066840	.	+	ena	start_codon	0	gene_id "AFUB_066840"; transcript_id "EDP50346"; exon_number "1"; gene_source "ena"; gene_biotype "protein_coding"; transcript_source "ena"; transcript_biotype "protein_coding";	104	3
DS499598	1092374	1092375	DS499598	1092460	1092463	AFUB_066850	.	+	ena	start_codon	0	gene_id "AFUB_066850"; transcript_id "EDP50347"; exon_number "1"; gene_source "ena"; gene_biotype "protein_coding"; transcript_source "ena"; transcript_biotype "protein_coding";	86	3
DS499598	1094740	1094741	DS499598	1094815	1094818	AFUB_066860	.	+	ena	start_codon	0	gene_id "AFUB_066860"; transcript_id "EDP50348"; exon_number "1"; gene_source "ena"; gene_biotype "protein_coding"; transcript_source "ena"; transcript_biotype "protein_coding";	75	3
DS499598	1095948	1095949	DS499598	1096014	1096017	AFUB_066870	.	+	ena	start_codon	0	gene_id "AFUB_066870"; transcript_id "EDP50349"; exon_number "1"; gene_source "ena"; gene_biotype "protein_coding"; transcript_source "ena"; transcript_biotype "protein_coding";	66	3
DS499598	1106355	1106356	DS499598	1106495	1106498	AFUB_066910	.	+	ena	start_codon	0	gene_id "AFUB_066910"; transcript_id "EDP50353"; exon_number "1"; gene_source "ena"; gene_biotype "protein_coding"; transcript_source "ena"; transcript_biotype "protein_coding";	140	3
DS499598	1112771	1112772	DS499598	1112824	1112827	AFUB_066950	.	+	ena	start_codon	0	gene_id "AFUB_066950"; transcript_id "EDP50357"; exon_number "1"; gene_source "ena"; gene_biotype "protein_coding"; transcript_source "ena"; transcript_biotype "protein_coding";	53	3
DS499598	1152693	1152694	DS499598	1152931	1152934	AFUB_067140	.	+	ena	start_codon	0	gene_id "AFUB_067140"; transcript_id "EDP50376"; exon_number "1"; gene_source "ena"; gene_biotype "protein_coding"; transcript_source "ena"; transcript_biotype "protein_coding";	238	3
DS499598	1157598	1157599	DS499598	1157718	1157721	AFUB_067160	.	+	ena	CDS	0	gene_id "AFUB_067160"; transcript_id "EDP50378"; exon_number "1"; gene_source "ena"; gene_biotype "protein_coding"; transcript_source "ena"; transcript_biotype "protein_coding"; protein_id "EDP50378";	120	3
DS499598	1161459	1161460	DS499598	1161630	1161633	AFUB_067180	.	+	ena	start_codon	0	gene_id "AFUB_067180"; transcript_id "EDP50380"; exon_number "1"; gene_source "ena"; gene_biotype "protein_coding"; transcript_source "ena"; transcript_biotype "protein_coding";	171	3
DS499598	1171567	1171568	DS499598	1171779	1171782	AFUB_067210	.	+	ena	start_codon	0	gene_id "AFUB_067210"; transcript_id "EDP50383"; exon_number "1"; gene_source "ena"; gene_biotype "protein_coding"; transcript_source "ena"; transcript_biotype "protein_coding";	212	3
DS499598	1192035	1192036	DS499598	1194146	1194149	AFUB_067240	.	+	ena	start_codon	0	gene_id "AFUB_067240"; transcript_id "EDP50386"; exon_number "1"; gene_source "ena"; gene_biotype "protein_coding"; transcript_source "ena"; transcript_biotype "protein_coding";	2111	3
DS499598	1214295	1214296	DS499598	1214463	1214466	AFUB_067300	.	+	ena	start_codon	0	gene_id "AFUB_067300"; transcript_id "EDP50392"; exon_number "1"; gene_source "ena"; gene_biotype "protein_coding"; transcript_source "ena"; transcript_biotype "protein_coding";	168	3
DS499598	1219098	1219099	DS499598	1218753	1221956	AFUB_067320	.	+	ena	gene	.	gene_id "AFUB_067320"; gene_source "ena"; gene_biotype "protein_coding";	0	3
DS499598	1237540	1237541	DS499598	1237747	1237750	AFUB_067360	.	+	ena	start_codon	0	gene_id "AFUB_067360"; transcript_id "EDP50398"; exon_number "1"; gene_source "ena"; gene_biotype "protein_coding"; transcript_source "ena"; transcript_biotype "protein_coding";	207	3
DS499598	1244749	1244750	DS499598	1245387	1245390	AFUB_067390	.	+	ena	start_codon	0	gene_id "AFUB_067390"; transcript_id "EDP50401"; exon_number "1"; gene_source "ena"; gene_biotype "protein_coding"; transcript_source "ena"; transcript_biotype "protein_coding";	638	3
DS499598	1258958	1258959	DS499598	1259137	1259140	AFUB_067440	.	+	ena	start_codon	0	gene_id "AFUB_067440"; transcript_id "EDP50406"; exon_number "1"; gene_source "ena"; gene_biotype "protein_coding"; transcript_source "ena"; transcript_biotype "protein_coding";	179	3
DS499598	1263328	1263329	DS499598	1263456	1263459	AFUB_067450	.	+	ena	start_codon	0	gene_id "AFUB_067450"; transcript_id "EDP50407"; exon_number "1"; gene_source "ena"; gene_biotype "protein_coding"; transcript_source "ena"; transcript_biotype "protein_coding";	128	3
DS499598	1301844	1301845	DS499598	1301952	1301955	AFUB_067560	.	+	ena	start_codon	0	gene_id "AFUB_067560"; transcript_id "EDP50418"; exon_number "1"; gene_source "ena"; gene_biotype "protein_coding"; transcript_source "ena"; transcript_biotype "protein_coding";	108	3
DS499598	1304251	1304252	DS499598	1304350	1304353	AFUB_067570	.	+	ena	start_codon	0	gene_id "AFUB_067570"; transcript_id "EDP50419"; exon_number "1"; gene_source "ena"; gene_biotype "protein_coding"; transcript_source "ena"; transcript_biotype "protein_coding";	99	3
DS499598	1312505	1312506	DS499598	1312595	1312598	AFUB_067610	.	+	ena	start_codon	0	gene_id "AFUB_067610"; transcript_id "EDP50423"; exon_number "1"; gene_source "ena"; gene_biotype "protein_coding"; transcript_source "ena"; transcript_biotype "protein_coding";	90	3
DS499598	1321920	1321921	DS499598	1322033	1322036	AFUB_067650	.	+	ena	start_codon	0	gene_id "AFUB_067650"; transcript_id "EDP50427"; exon_number "1"; gene_source "ena"; gene_biotype "protein_coding"; transcript_source "ena"; transcript_biotype "protein_coding";	113	3
DS499598	1342042	1342043	DS499598	1342551	1342554	AFUB_067750	.	+	ena	start_codon	0	gene_id "AFUB_067750"; transcript_id "EDP50437"; exon_number "1"; gene_source "ena"; gene_biotype "protein_coding"; transcript_source "ena"; transcript_biotype "protein_coding";	509	3
DS499598	1347523	1347524	DS499598	1347698	1347701	AFUB_067770	.	+	ena	start_codon	0	gene_id "AFUB_067770"; transcript_id "EDP50439"; exon_number "1"; gene_source "ena"; gene_biotype "protein_coding"; transcript_source "ena"; transcript_biotype "protein_coding";	175	3
DS499598	1348976	1348977	DS499598	1349076	1349079	AFUB_067780	.	+	ena	start_codon	0	gene_id "AFUB_067780"; transcript_id "EDP50440"; exon_number "1"; gene_source "ena"; gene_biotype "protein_coding"; transcript_source "ena"; transcript_biotype "protein_coding";	100	3
DS499598	1356043	1356044	DS499598	1356164	1356167	AFUB_067820	.	+	ena	start_codon	0	gene_id "AFUB_067820"; transcript_id "EDP50444"; exon_number "1"; gene_source "ena"; gene_biotype "protein_coding"; transcript_source "ena"; transcript_biotype "protein_coding";	121	3
DS499598	1357358	1357359	DS499598	1357473	1357476	AFUB_067830	.	+	ena	start_codon	0	gene_id "AFUB_067830"; transcript_id "EDP50445"; exon_number "1"; gene_source "ena"; gene_biotype "protein_coding"; transcript_source "ena"; transcript_biotype "protein_coding";	115	3
DS499598	1380041	1380042	DS499598	1380223	1380226	AFUB_067870	.	+	ena	start_codon	0	gene_id "AFUB_067870"; transcript_id "EDP50449"; exon_number "1"; gene_source "ena"; gene_biotype "protein_coding"; transcript_source "ena"; transcript_biotype "protein_coding";	182	3
DS499598	1391863	1391864	DS499598	1392307	1392310	AFUB_067910	.	+	ena	start_codon	0	gene_id "AFUB_067910"; transcript_id "EDP50453"; exon_number "1"; gene_source "ena"; gene_biotype "protein_coding"; transcript_source "ena"; transcript_biotype "protein_coding";	444	3
DS499598	1438251	1438252	DS499598	1438317	1438320	AFUB_068090	.	+	ena	start_codon	0	gene_id "AFUB_068090"; transcript_id "EDP50472"; exon_number "1"; gene_source "ena"; gene_biotype "protein_coding"; transcript_source "ena"; transcript_biotype "protein_coding";	66	3
DS499598	1498373	1498374	DS499598	1498444	1498447	AFUB_068270	.	+	ena	start_codon	0	gene_id "AFUB_068270"; transcript_id "EDP50490"; exon_number "1"; gene_source "ena"; gene_biotype "protein_coding"; transcript_source "ena"; transcript_biotype "protein_coding";	71	3
DS499598	1503447	1503448	DS499598	1503903	1503906	AFUB_068280	.	+	ena	start_codon	0	gene_id "AFUB_068280"; transcript_id "EDP50491"; exon_number "1"; gene_source "ena"; gene_biotype "protein_coding"; transcript_source "ena"; transcript_biotype "protein_coding";	456	3
DS499598	1521929	1521930	DS499598	1522090	1522093	AFUB_068330	.	+	ena	start_codon	0	gene_id "AFUB_068330"; transcript_id "EDP50496"; exon_number "1"; gene_source "ena"; gene_biotype "protein_coding"; transcript_source "ena"; transcript_biotype "protein_coding";	161	3
DS499598	1534840	1534841	DS499598	1535283	1535286	AFUB_068360	.	+	ena	start_codon	0	gene_id "AFUB_068360"; transcript_id "EDP50499"; exon_number "1"; gene_source "ena"; gene_biotype "protein_coding"; transcript_source "ena"; transcript_biotype "protein_coding";	443	3
DS499598	1547966	1547967	DS499598	1548066	1548069	AFUB_068420	.	+	ena	start_codon	0	gene_id "AFUB_068420"; transcript_id "EDP50505"; exon_number "1"; gene_source "ena"; gene_biotype "protein_coding"; transcript_source "ena"; transcript_biotype "protein_coding";	100	3
DS499598	1570543	1570544	DS499598	1570495	1571782	AFUB_068490	.	+	ena	CDS	0	gene_id "AFUB_068490"; transcript_id "EDP50512"; exon_number "1"; gene_source "ena"; gene_biotype "protein_coding"; transcript_source "ena"; transcript_biotype "protein_coding"; protein_id "EDP50512";	0	3
DS499598	1589370	1589371	DS499598	1589471	1589474	AFUB_068520	.	+	ena	start_codon	0	gene_id "AFUB_068520"; transcript_id "EDP50515"; exon_number "1"; gene_source "ena"; gene_biotype "protein_coding"; transcript_source "ena"; transcript_biotype "protein_coding";	101	3
DS499598	1596175	1596176	DS499598	1596481	1596484	AFUB_068550	.	+	ena	start_codon	0	gene_id "AFUB_068550"; transcript_id "EDP50518"; exon_number "1"; gene_source "ena"; gene_biotype "protein_coding"; transcript_source "ena"; transcript_biotype "protein_coding";	306	3
DS499598	1620810	1620811	DS499598	1620913	1620916	AFUB_068610	.	+	ena	start_codon	0	gene_id "AFUB_068610"; transcript_id "EDP50524"; exon_number "1"; gene_source "ena"; gene_biotype "protein_coding"; transcript_source "ena"; transcript_biotype "protein_coding";	103	3
DS499598	1640006	1640007	DS499598	1640405	1640408	AFUB_068670	.	+	ena	start_codon	0	gene_id "AFUB_068670"; transcript_id "EDP50530"; exon_number "1"; gene_source "ena"; gene_biotype "protein_coding"; transcript_source "ena"; transcript_biotype "protein_coding";	399	3
DS499598	1683326	1683327	DS499598	1683366	1683369	AFUB_068830	.	+	ena	start_codon	0	gene_id "AFUB_068830"; transcript_id "EDP50546"; exon_number "1"; gene_source "ena"; gene_biotype "protein_coding"; transcript_source "ena"; transcript_biotype "protein_coding";	40	3
DS499598	1686179	1686180	DS499598	1686432	1686435	AFUB_068840	.	+	ena	start_codon	0	gene_id "AFUB_068840"; transcript_id "EDP50547"; exon_number "1"; gene_source "ena"; gene_biotype "protein_coding"; transcript_source "ena"; transcript_biotype "protein_coding";	253	3
DS499598	1700875	1700876	DS499598	1701203	1701206	AFUB_068900	.	+	ena	start_codon	0	gene_id "AFUB_068900"; transcript_id "EDP50553"; exon_number "1"; gene_source "ena"; gene_biotype "protein_coding"; transcript_source "ena"; transcript_biotype "protein_coding";	328	3
DS499598	1712836	1712837	DS499598	1712947	1712950	AFUB_068960	.	+	ena	start_codon	0	gene_id "AFUB_068960"; transcript_id "EDP50559"; exon_number "1"; gene_source "ena"; gene_biotype "protein_coding"; transcript_source "ena"; transcript_biotype "protein_coding";	111	3
DS499598	1715286	1715287	DS499598	1715215	1716466	AFUB_068980	.	+	ena	CDS	0	gene_id "AFUB_068980"; transcript_id "EDP50561"; exon_number "1"; gene_source "ena"; gene_biotype "protein_coding"; transcript_source "ena"; transcript_biotype "protein_coding"; protein_id "EDP50561";	0	3
DS499598	1731334	1731335	DS499598	1731474	1731477	AFUB_069050	.	+	ena	start_codon	0	gene_id "AFUB_069050"; transcript_id "EDP50568"; exon_number "1"; gene_source "ena"; gene_biotype "protein_coding"; transcript_source "ena"; transcript_biotype "protein_coding";	140	3
DS499598	1739515	1739516	DS499598	1739597	1739600	AFUB_069070	.	+	ena	start_codon	0	gene_id "AFUB_069070"; transcript_id "EDP50570"; exon_number "1"; gene_source "ena"; gene_biotype "protein_coding"; transcript_source "ena"; transcript_biotype "protein_coding";	82	3
DS499598	1754397	1754398	DS499598	1754604	1754607	AFUB_069150	.	+	ena	start_codon	0	gene_id "AFUB_069150"; transcript_id "EDP50578"; exon_number "1"; gene_source "ena"; gene_biotype "protein_coding"; transcript_source "ena"; transcript_biotype "protein_coding";	207	3
DS499598	1769850	1769851	DS499598	1770082	1770085	AFUB_069200	.	+	ena	start_codon	0	gene_id "AFUB_069200"; transcript_id "EDP50583"; exon_number "1"; gene_source "ena"; gene_biotype "protein_coding"; transcript_source "ena"; transcript_biotype "protein_coding";	232	3
DS499598	1772206	1772207	DS499598	1772284	1772287	AFUB_069220	.	+	ena	start_codon	0	gene_id "AFUB_069220"; transcript_id "EDP50585"; exon_number "1"; gene_source "ena"; gene_biotype "protein_coding"; transcript_source "ena"; transcript_biotype "protein_coding";	78	3
DS499598	1799107	1799108	DS499598	1798986	1799146	AFUB_069330	.	+	ena	CDS	0	gene_id "AFUB_069330"; transcript_id "EDP50596"; exon_number "1"; gene_source "ena"; gene_biotype "protein_coding"; transcript_source "ena"; transcript_biotype "protein_coding"; protein_id "EDP50596";	0	3
DS499598	1803750	1803751	DS499598	1803943	1803946	AFUB_069350	.	+	ena	start_codon	0	gene_id "AFUB_069350"; transcript_id "EDP50598"; exon_number "1"; gene_source "ena"; gene_biotype "protein_coding"; transcript_source "ena"; transcript_biotype "protein_coding";	193	3
DS499598	1831154	1831155	DS499598	1831403	1831406	AFUB_069410	.	+	ena	start_codon	0	gene_id "AFUB_069410"; transcript_id "EDP50604"; exon_number "1"; gene_source "ena"; gene_biotype "protein_coding"; transcript_source "ena"; transcript_biotype "protein_coding";	249	3
DS499598	1835811	1835812	DS499598	1836666	1836669	AFUB_069420	.	+	ena	start_codon	0	gene_id "AFUB_069420"; transcript_id "EDP50605"; exon_number "1"; gene_source "ena"; gene_biotype "protein_coding"; transcript_source "ena"; transcript_biotype "protein_coding";	855	3
DS499598	1840650	1840651	DS499598	1840865	1840868	AFUB_069440	.	+	ena	start_codon	0	gene_id "AFUB_069440"; transcript_id "EDP50607"; exon_number "1"; gene_source "ena"; gene_biotype "protein_coding"; transcript_source "ena"; transcript_biotype "protein_coding";	215	3
DS499598	1843907	1843908	DS499598	1844601	1844604	AFUB_069450	.	+	ena	start_codon	0	gene_id "AFUB_069450"; transcript_id "EDP50608"; exon_number "1"; gene_source "ena"; gene_biotype "protein_coding"; transcript_source "ena"; transcript_biotype "protein_coding";	694	3
DS499598	1844505	1844506	DS499598	1844601	1844604	AFUB_069450	.	+	ena	start_codon	0	gene_id "AFUB_069450"; transcript_id "EDP50608"; exon_number "1"; gene_source "ena"; gene_biotype "protein_coding"; transcript_source "ena"; transcript_biotype "protein_coding";	96	3
DS499598	1863088	1863089	DS499598	1863496	1863499	AFUB_069520	.	+	ena	start_codon	0	gene_id "AFUB_069520"; transcript_id "EDP50615"; exon_number "1"; gene_source "ena"; gene_biotype "protein_coding"; transcript_source "ena"; transcript_biotype "protein_coding";	408	3
DS499598	1869254	1869255	DS499598	1869574	1869577	AFUB_069540	.	+	ena	start_codon	0	gene_id "AFUB_069540"; transcript_id "EDP50617"; exon_number "1"; gene_source "ena"; gene_biotype "protein_coding"; transcript_source "ena"; transcript_biotype "protein_coding";	320	3
DS499598	1876134	1876135	DS499598	1876321	1876324	AFUB_069560	.	+	ena	start_codon	0	gene_id "AFUB_069560"; transcript_id "EDP50619"; exon_number "1"; gene_source "ena"; gene_biotype "protein_coding"; transcript_source "ena"; transcript_biotype "protein_coding";	187	3
DS499598	1882117	1882118	DS499598	1882224	1882227	AFUB_069590	.	+	ena	start_codon	0	gene_id "AFUB_069590"; transcript_id "EDP50622"; exon_number "1"; gene_source "ena"; gene_biotype "protein_coding"; transcript_source "ena"; transcript_biotype "protein_coding";	107	3
DS499598	1915385	1915386	DS499598	1915747	1915750	AFUB_069710	.	+	ena	start_codon	0	gene_id "AFUB_069710"; transcript_id "EDP50634"; exon_number "1"; gene_source "ena"; gene_biotype "protein_coding"; transcript_source "ena"; transcript_biotype "protein_coding";	362	3
DS499598	1920702	1920703	DS499598	1920792	1920795	AFUB_069730	.	+	ena	start_codon	0	gene_id "AFUB_069730"; transcript_id "EDP50636"; exon_number "1"; gene_source "ena"; gene_biotype "protein_coding"; transcript_source "ena"; transcript_biotype "protein_coding";	90	3
DS499598	1926008	1926009	DS499598	1926189	1926192	AFUB_069760	.	+	ena	start_codon	0	gene_id "AFUB_069760"; transcript_id "EDP50639"; exon_number "1"; gene_source "ena"; gene_biotype "protein_coding"; transcript_source "ena"; transcript_biotype "protein_coding";	181	3
DS499598	1928935	1928936	DS499598	1929009	1929012	AFUB_069770	.	+	ena	start_codon	0	gene_id "AFUB_069770"; transcript_id "EDP50640"; exon_number "1"; gene_source "ena"; gene_biotype "protein_coding"; transcript_source "ena"; transcript_biotype "protein_coding";	74	3
DS499598	1933411	1933412	DS499598	1933497	1933500	AFUB_069790	.	+	ena	start_codon	0	gene_id "AFUB_069790"; transcript_id "EDP50642"; exon_number "1"; gene_source "ena"; gene_biotype "protein_coding"; transcript_source "ena"; transcript_biotype "protein_coding";	86	3
DS499598	1949719	1949720	DS499598	1949898	1949901	AFUB_069840	.	+	ena	start_codon	0	gene_id "AFUB_069840"; transcript_id "EDP50647"; exon_number "1"; gene_source "ena"; gene_biotype "protein_coding"; transcript_source "ena"; transcript_biotype "protein_coding";	179	3
DS499598	1971417	1971418	DS499598	1971858	1971861	AFUB_069920	.	+	ena	start_codon	0	gene_id "AFUB_069920"; transcript_id "EDP50655"; exon_number "1"; gene_source "ena"; gene_biotype "protein_coding"; transcript_source "ena"; transcript_biotype "protein_coding";	441	3
DS499598	1976211	1976212	DS499598	1976308	1976311	AFUB_069940	.	+	ena	start_codon	0	gene_id "AFUB_069940"; transcript_id "EDP50657"; exon_number "1"; gene_source "ena"; gene_biotype "protein_coding"; transcript_source "ena"; transcript_biotype "protein_coding";	97	3
DS499598	1978576	1978577	DS499598	1978596	1978599	AFUB_069950	.	+	ena	start_codon	0	gene_id "AFUB_069950"; transcript_id "EDP50658"; exon_number "1"; gene_source "ena"; gene_biotype "protein_coding"; transcript_source "ena"; transcript_biotype "protein_coding";	20	3
DS499598	2069052	2069053	DS499598	2069358	2069361	AFUB_070300	.	+	ena	start_codon	0	gene_id "AFUB_070300"; transcript_id "EDP50690"; exon_number "1"; gene_source "ena"; gene_biotype "protein_coding"; transcript_source "ena"; transcript_biotype "protein_coding";	306	3
DS499598	2073850	2073851	DS499598	2073882	2073885	AFUB_070330	.	+	ena	start_codon	0	gene_id "AFUB_070330"; transcript_id "EDP50693"; exon_number "1"; gene_source "ena"; gene_biotype "protein_coding"; transcript_source "ena"; transcript_biotype "protein_coding";	32	3
DS499598	2089991	2089992	DS499598	2090249	2090252	AFUB_070390	.	+	ena	start_codon	0	gene_id "AFUB_070390"; transcript_id "EDP50699"; exon_number "1"; gene_source "ena"; gene_biotype "protein_coding"; transcript_source "ena"; transcript_biotype "protein_coding";	258	3
DS499598	2092084	2092085	DS499598	2092129	2092132	AFUB_070410	.	+	ena	start_codon	0	gene_id "AFUB_070410"; transcript_id "EDP50701"; exon_number "1"; gene_source "ena"; gene_biotype "protein_coding"; transcript_source "ena"; transcript_biotype "protein_coding";	45	3
DS499598	2148808	2148809	DS499598	2148892	2148895	AFUB_070610	.	+	ena	start_codon	0	gene_id "AFUB_070610"; transcript_id "EDP50721"; exon_number "1"; gene_source "ena"; gene_biotype "protein_coding"; transcript_source "ena"; transcript_biotype "protein_coding";	84	3
DS499598	2153956	2153957	DS499598	2154412	2154415	AFUB_070630	.	+	ena	start_codon	0	gene_id "AFUB_070630"; transcript_id "EDP50723"; exon_number "1"; gene_source "ena"; gene_biotype "protein_coding"; transcript_source "ena"; transcript_biotype "protein_coding";	456	3
DS499598	2162035	2162036	DS499598	2162070	2162073	AFUB_070670	.	+	ena	start_codon	0	gene_id "AFUB_070670"; transcript_id "EDP50727"; exon_number "1"; gene_source "ena"; gene_biotype "protein_coding"; transcript_source "ena"; transcript_biotype "protein_coding";	35	3
DS499598	2166803	2166804	DS499598	2166831	2166834	AFUB_070710	.	+	ena	start_codon	0	gene_id "AFUB_070710"; transcript_id "EDP50731"; exon_number "1"; gene_source "ena"; gene_biotype "protein_coding"; transcript_source "ena"; transcript_biotype "protein_coding";	28	3
DS499598	2188304	2188305	DS499598	2188188	2188799	AFUB_070810	.	+	ena	CDS	0	gene_id "AFUB_070810"; transcript_id "EDP50741"; exon_number "1"; gene_source "ena"; gene_biotype "protein_coding"; transcript_source "ena"; transcript_biotype "protein_coding"; protein_id "EDP50741";	0	3
DS499598	2204240	2204241	DS499598	2204326	2204329	AFUB_070860	.	+	ena	start_codon	0	gene_id "AFUB_070860"; transcript_id "EDP50746"; exon_number "1"; gene_source "ena"; gene_biotype "protein_coding"; transcript_source "ena"; transcript_biotype "protein_coding";	86	3
DS499598	2275713	2275714	DS499598	2275769	2275772	AFUB_071100	.	+	ena	start_codon	0	gene_id "AFUB_071100"; transcript_id "EDP50769"; exon_number "1"; gene_source "ena"; gene_biotype "protein_coding"; transcript_source "ena"; transcript_biotype "protein_coding";	56	3
DS499598	2278531	2278532	DS499598	2279419	2279422	AFUB_071120	.	+	ena	start_codon	0	gene_id "AFUB_071120"; transcript_id "EDP50771"; exon_number "1"; gene_source "ena"; gene_biotype "protein_coding"; transcript_source "ena"; transcript_biotype "protein_coding";	888	3
DS499598	2298596	2298597	DS499598	2298955	2298958	AFUB_071180	.	+	ena	start_codon	0	gene_id "AFUB_071180"; transcript_id "EDP50777"; exon_number "1"; gene_source "ena"; gene_biotype "protein_coding"; transcript_source "ena"; transcript_biotype "protein_coding";	359	3
DS499598	2301109	2301110	DS499598	2301125	2301128	AFUB_071190	.	+	ena	start_codon	0	gene_id "AFUB_071190"; transcript_id "EDP50778"; exon_number "1"; gene_source "ena"; gene_biotype "protein_coding"; transcript_source "ena"; transcript_biotype "protein_coding";	16	3
DS499598	2316278	2316279	DS499598	2316365	2316368	AFUB_071230	.	+	ena	start_codon	0	gene_id "AFUB_071230"; transcript_id "EDP50782"; exon_number "1"; gene_source "ena"; gene_biotype "protein_coding"; transcript_source "ena"; transcript_biotype "protein_coding";	87	3
DS499598	2353925	2353926	DS499598	2353954	2353957	AFUB_071400	.	+	ena	start_codon	0	gene_id "AFUB_071400"; transcript_id "EDP50799"; exon_number "1"; gene_source "ena"; gene_biotype "protein_coding"; transcript_source "ena"; transcript_biotype "protein_coding";	29	3
DS499598	2398153	2398154	DS499598	2398233	2398236	AFUB_071490	.	+	ena	start_codon	0	gene_id "AFUB_071490"; transcript_id "EDP50808"; exon_number "1"; gene_source "ena"; gene_biotype "protein_coding"; transcript_source "ena"; transcript_biotype "protein_coding";	80	3
DS499598	2408149	2408150	DS499598	2408169	2408172	AFUB_071520	.	+	ena	start_codon	0	gene_id "AFUB_071520"; transcript_id "EDP50811"; exon_number "1"; gene_source "ena"; gene_biotype "protein_coding"; transcript_source "ena"; transcript_biotype "protein_coding";	20	3
DS499598	2459080	2459081	DS499598	2459293	2459296	AFUB_071600	.	+	ena	start_codon	0	gene_id "AFUB_071600"; transcript_id "EDP50820"; exon_number "1"; gene_source "ena"; gene_biotype "protein_coding"; transcript_source "ena"; transcript_biotype "protein_coding";	213	3
DS499598	2463012	2463013	DS499598	2463121	2463124	AFUB_071620	.	+	ena	start_codon	0	gene_id "AFUB_071620"; transcript_id "EDP50822"; exon_number "1"; gene_source "ena"; gene_biotype "protein_coding"; transcript_source "ena"; transcript_biotype "protein_coding";	109	3
DS499598	2502808	2502809	DS499598	2503237	2503240	AFUB_071660	.	+	ena	start_codon	0	gene_id "AFUB_071660"; transcript_id "EDP50826"; exon_number "1"; gene_source "ena"; gene_biotype "protein_coding"; transcript_source "ena"; transcript_biotype "protein_coding";	429	3
DS499598	2520469	2520470	DS499598	2520608	2520611	AFUB_071700	.	+	ena	start_codon	0	gene_id "AFUB_071700"; transcript_id "EDP50830"; exon_number "1"; gene_source "ena"; gene_biotype "protein_coding"; transcript_source "ena"; transcript_biotype "protein_coding";	139	3
DS499598	2554811	2554812	DS499598	2554815	2554818	AFUB_071860	.	+	ena	start_codon	0	gene_id "AFUB_071860"; transcript_id "EDP50846"; exon_number "1"; gene_source "ena"; gene_biotype "protein_coding"; transcript_source "ena"; transcript_biotype "protein_coding";	4	3
DS499599	9851	9852	DS499599	9859	9862	AFUB_072230	.	+	ena	start_codon	0	gene_id "AFUB_072230"; transcript_id "EDP49197"; exon_number "1"; gene_source "ena"; gene_biotype "protein_coding"; transcript_source "ena"; transcript_biotype "protein_coding";	8	3
DS499599	17457	17458	DS499599	17805	17808	AFUB_072250	.	+	ena	start_codon	0	gene_id "AFUB_072250"; transcript_id "EDP49199"; exon_number "1"; gene_source "ena"; gene_biotype "protein_coding"; transcript_source "ena"; transcript_biotype "protein_coding";	348	3
DS499599	20698	20699	DS499599	20905	20908	AFUB_072260	.	+	ena	start_codon	0	gene_id "AFUB_072260"; transcript_id "EDP49200"; exon_number "1"; gene_source "ena"; gene_biotype "protein_coding"; transcript_source "ena"; transcript_biotype "protein_coding";	207	3
DS499599	28025	28026	DS499599	28093	28096	AFUB_072290	.	+	ena	start_codon	0	gene_id "AFUB_072290"; transcript_id "EDP49203"; exon_number "1"; gene_source "ena"; gene_biotype "protein_coding"; transcript_source "ena"; transcript_biotype "protein_coding";	68	3
DS499599	31665	31666	DS499599	32524	32527	AFUB_072310	.	+	ena	start_codon	0	gene_id "AFUB_072310"; transcript_id "EDP49205"; exon_number "1"; gene_source "ena"; gene_biotype "protein_coding"; transcript_source "ena"; transcript_biotype "protein_coding";	859	3
DS499599	45935	45936	DS499599	46013	46016	AFUB_072350	.	+	ena	start_codon	0	gene_id "AFUB_072350"; transcript_id "EDP49209"; exon_number "1"; gene_source "ena"; gene_biotype "protein_coding"; transcript_source "ena"; transcript_biotype "protein_coding";	78	3
DS499599	49581	49582	DS499599	49702	49705	AFUB_072370	.	+	ena	start_codon	0	gene_id "AFUB_072370"; transcript_id "EDP49211"; exon_number "1"; gene_source "ena"; gene_biotype "protein_coding"; transcript_source "ena"; transcript_biotype "protein_coding";	121	3
DS499599	53307	53308	DS499599	53441	53444	AFUB_072390	.	+	ena	start_codon	0	gene_id "AFUB_072390"; transcript_id "EDP49213"; exon_number "1"; gene_source "ena"; gene_biotype "protein_coding"; transcript_source "ena"; transcript_biotype "protein_coding";	134	3
DS499599	62314	62315	DS499599	62417	62420	AFUB_072420	.	+	ena	start_codon	0	gene_id "AFUB_072420"; transcript_id "EDP49216"; exon_number "1"; gene_source "ena"; gene_biotype "protein_coding"; transcript_source "ena"; transcript_biotype "protein_coding";	103	3
DS499599	62342	62343	DS499599	62417	62420	AFUB_072420	.	+	ena	start_codon	0	gene_id "AFUB_072420"; transcript_id "EDP49216"; exon_number "1"; gene_source "ena"; gene_biotype "protein_coding"; transcript_source "ena"; transcript_biotype "protein_coding";	75	3
DS499599	96216	96217	DS499599	96603	96606	AFUB_072530	.	+	ena	start_codon	0	gene_id "AFUB_072530"; transcript_id "EDP49227"; exon_number "1"; gene_source "ena"; gene_biotype "protein_coding"; transcript_source "ena"; transcript_biotype "protein_coding";	387	3
DS499599	100281	100282	DS499599	100426	100429	AFUB_072550	.	+	ena	start_codon	0	gene_id "AFUB_072550"; transcript_id "EDP49229"; exon_number "1"; gene_source "ena"; gene_biotype "protein_coding"; transcript_source "ena"; transcript_biotype "protein_coding";	145	3
DS499599	103333	103334	DS499599	103467	103470	AFUB_072570	.	+	ena	start_codon	0	gene_id "AFUB_072570"; transcript_id "EDP49231"; exon_number "1"; gene_source "ena"; gene_biotype "protein_coding"; transcript_source "ena"; transcript_biotype "protein_coding";	134	3
DS499599	117831	117832	DS499599	117932	117935	AFUB_072620	.	+	ena	start_codon	0	gene_id "AFUB_072620"; transcript_id "EDP49236"; exon_number "1"; gene_source "ena"; gene_biotype "protein_coding"; transcript_source "ena"; transcript_biotype "protein_coding";	101	3
DS499599	135041	135042	DS499599	135645	135648	AFUB_072680	.	+	ena	start_codon	0	gene_id "AFUB_072680"; transcript_id "EDP49242"; exon_number "1"; gene_source "ena"; gene_biotype "protein_coding"; transcript_source "ena"; transcript_biotype "protein_coding";	604	3
DS499599	142058	142059	DS499599	142208	142211	AFUB_072710	.	+	ena	start_codon	0	gene_id "AFUB_072710"; transcript_id "EDP49245"; exon_number "1"; gene_source "ena"; gene_biotype "protein_coding"; transcript_source "ena"; transcript_biotype "protein_coding";	150	3
DS499599	157626	157627	DS499599	157906	157909	AFUB_072770	.	+	ena	start_codon	0	gene_id "AFUB_072770"; transcript_id "EDP49251"; exon_number "1"; gene_source "ena"; gene_biotype "protein_coding"; transcript_source "ena"; transcript_biotype "protein_coding";	280	3
DS499599	183936	183937	DS499599	184358	184361	AFUB_072830	.	+	ena	start_codon	0	gene_id "AFUB_072830"; transcript_id "EDP49257"; exon_number "1"; gene_source "ena"; gene_biotype "protein_coding"; transcript_source "ena"; transcript_biotype "protein_coding";	422	3
DS499599	184209	184210	DS499599	184358	184361	AFUB_072830	.	+	ena	start_codon	0	gene_id "AFUB_072830"; transcript_id "EDP49257"; exon_number "1"; gene_source "ena"; gene_biotype "protein_coding"; transcript_source "ena"; transcript_biotype "protein_coding";	149	3
DS499599	189516	189517	DS499599	189567	189570	AFUB_072850	.	+	ena	start_codon	0	gene_id "AFUB_072850"; transcript_id "EDP49259"; exon_number "1"; gene_source "ena"; gene_biotype "protein_coding"; transcript_source "ena"; transcript_biotype "protein_coding";	51	3
DS499599	194155	194156	DS499599	194280	194283	AFUB_072880	.	+	ena	start_codon	0	gene_id "AFUB_072880"; transcript_id "EDP49262"; exon_number "1"; gene_source "ena"; gene_biotype "protein_coding"; transcript_source "ena"; transcript_biotype "protein_coding";	125	3
DS499599	223978	223979	DS499599	223935	224137	AFUB_072940	.	+	ena	CDS	0	gene_id "AFUB_072940"; transcript_id "EDP49268"; exon_number "1"; gene_source "ena"; gene_biotype "protein_coding"; transcript_source "ena"; transcript_biotype "protein_coding"; protein_id "EDP49268";	0	3
DS499599	248370	248371	DS499599	248404	248407	AFUB_073020	.	+	ena	start_codon	0	gene_id "AFUB_073020"; transcript_id "EDP49275"; exon_number "1"; gene_source "ena"; gene_biotype "protein_coding"; transcript_source "ena"; transcript_biotype "protein_coding";	34	3
DS499599	251879	251880	DS499599	251943	251946	AFUB_073040	.	+	ena	start_codon	0	gene_id "AFUB_073040"; transcript_id "EDP49277"; exon_number "1"; gene_source "ena"; gene_biotype "protein_coding"; transcript_source "ena"; transcript_biotype "protein_coding";	64	3
DS499599	257360	257361	DS499599	257575	257578	AFUB_073060	.	+	ena	start_codon	0	gene_id "AFUB_073060"; transcript_id "EDP49279"; exon_number "1"; gene_source "ena"; gene_biotype "protein_coding"; transcript_source "ena"; transcript_biotype "protein_coding";	215	3
DS499599	261906	261907	DS499599	261979	261982	AFUB_073090	.	+	ena	start_codon	0	gene_id "AFUB_073090"; transcript_id "EDP49282"; exon_number "1"; gene_source "ena"; gene_biotype "protein_coding"; transcript_source "ena"; transcript_biotype "protein_coding";	73	3
DS499599	275695	275696	DS499599	275653	275782	AFUB_073150	.	+	ena	CDS	0	gene_id "AFUB_073150"; transcript_id "EDP49288"; exon_number "1"; gene_source "ena"; gene_biotype "protein_coding"; transcript_source "ena"; transcript_biotype "protein_coding"; protein_id "EDP49288";	0	3
DS499599	289074	289075	DS499599	289138	289141	AFUB_073220	.	+	ena	start_codon	0	gene_id "AFUB_073220"; transcript_id "EDP49295"; exon_number "1"; gene_source "ena"; gene_biotype "protein_coding"; transcript_source "ena"; transcript_biotype "protein_coding";	64	3
DS499599	300232	300233	DS499599	300313	300316	AFUB_073270	.	+	ena	start_codon	0	gene_id "AFUB_073270"; transcript_id "EDP49300"; exon_number "1"; gene_source "ena"; gene_biotype "protein_coding"; transcript_source "ena"; transcript_biotype "protein_coding";	81	3
DS499599	310507	310508	DS499599	310602	310605	AFUB_073310	.	+	ena	start_codon	0	gene_id "AFUB_073310"; transcript_id "EDP49304"; exon_number "1"; gene_source "ena"; gene_biotype "protein_coding"; transcript_source "ena"; transcript_biotype "protein_coding";	95	3
DS499599	318686	318687	DS499599	318749	318752	AFUB_073340	.	+	ena	start_codon	0	gene_id "AFUB_073340"; transcript_id "EDP49307"; exon_number "1"; gene_source "ena"; gene_biotype "protein_coding"; transcript_source "ena"; transcript_biotype "protein_coding";	63	3
DS499599	324552	324553	DS499599	324590	324593	AFUB_073360	.	+	ena	start_codon	0	gene_id "AFUB_073360"; transcript_id "EDP49309"; exon_number "1"; gene_source "ena"; gene_biotype "protein_coding"; transcript_source "ena"; transcript_biotype "protein_coding";	38	3
DS499599	334809	334810	DS499599	334898	334901	AFUB_073410	.	+	ena	start_codon	0	gene_id "AFUB_073410"; transcript_id "EDP49314"; exon_number "1"; gene_source "ena"; gene_biotype "protein_coding"; transcript_source "ena"; transcript_biotype "protein_coding";	89	3
DS499599	364398	364399	DS499599	364837	364840	AFUB_073480	.	+	ena	start_codon	0	gene_id "AFUB_073480"; transcript_id "EDP49321"; exon_number "1"; gene_source "ena"; gene_biotype "protein_coding"; transcript_source "ena"; transcript_biotype "protein_coding";	439	3
DS499599	364403	364404	DS499599	364837	364840	AFUB_073480	.	+	ena	start_codon	0	gene_id "AFUB_073480"; transcript_id "EDP49321"; exon_number "1"; gene_source "ena"; gene_biotype "protein_coding"; transcript_source "ena"; transcript_biotype "protein_coding";	434	3
DS499599	373522	373523	DS499599	373906	373909	AFUB_073510	.	+	ena	start_codon	0	gene_id "AFUB_073510"; transcript_id "EDP49324"; exon_number "1"; gene_source "ena"; gene_biotype "protein_coding"; transcript_source "ena"; transcript_biotype "protein_coding";	384	3
DS499599	392937	392938	DS499599	393001	393004	AFUB_073600	.	+	ena	start_codon	0	gene_id "AFUB_073600"; transcript_id "EDP49333"; exon_number "1"; gene_source "ena"; gene_biotype "protein_coding"; transcript_source "ena"; transcript_biotype "protein_coding";	64	3
DS499599	400743	400744	DS499599	400802	400805	AFUB_073640	.	+	ena	start_codon	0	gene_id "AFUB_073640"; transcript_id "EDP49337"; exon_number "1"; gene_source "ena"; gene_biotype "protein_coding"; transcript_source "ena"; transcript_biotype "protein_coding";	59	3
DS499599	427723	427724	DS499599	427832	427835	AFUB_073720	.	+	ena	start_codon	0	gene_id "AFUB_073720"; transcript_id "EDP49345"; exon_number "1"; gene_source "ena"; gene_biotype "protein_coding"; transcript_source "ena"; transcript_biotype "protein_coding";	109	3
DS499599	431041	431042	DS499599	431067	431070	AFUB_073730	.	+	ena	start_codon	0	gene_id "AFUB_073730"; transcript_id "EDP49346"; exon_number "1"; gene_source "ena"; gene_biotype "protein_coding"; transcript_source "ena"; transcript_biotype "protein_coding";	26	3
DS499599	431051	431052	DS499599	431067	431070	AFUB_073730	.	+	ena	start_codon	0	gene_id "AFUB_073730"; transcript_id "EDP49346"; exon_number "1"; gene_source "ena"; gene_biotype "protein_coding"; transcript_source "ena"; transcript_biotype "protein_coding";	16	3
DS499599	465067	465068	DS499599	465172	465175	AFUB_073830	.	+	ena	start_codon	0	gene_id "AFUB_073830"; transcript_id "EDP49356"; exon_number "1"; gene_source "ena"; gene_biotype "protein_coding"; transcript_source "ena"; transcript_biotype "protein_coding";	105	3
DS499599	472196	472197	DS499599	472524	472527	AFUB_073860	.	+	ena	start_codon	0	gene_id "AFUB_073860"; transcript_id "EDP49359"; exon_number "1"; gene_source "ena"; gene_biotype "protein_coding"; transcript_source "ena"; transcript_biotype "protein_coding";	328	3
DS499599	484852	484853	DS499599	485728	485731	AFUB_073890	.	+	ena	start_codon	0	gene_id "AFUB_073890"; transcript_id "EDP49362"; exon_number "1"; gene_source "ena"; gene_biotype "protein_coding"; transcript_source "ena"; transcript_biotype "protein_coding";	876	3
DS499599	488980	488981	DS499599	489393	489396	AFUB_073900	.	+	ena	start_codon	0	gene_id "AFUB_073900"; transcript_id "EDP49363"; exon_number "1"; gene_source "ena"; gene_biotype "protein_coding"; transcript_source "ena"; transcript_biotype "protein_coding";	413	3
DS499599	495157	495158	DS499599	495332	495335	AFUB_073930	.	+	ena	start_codon	0	gene_id "AFUB_073930"; transcript_id "EDP49366"; exon_number "1"; gene_source "ena"; gene_biotype "protein_coding"; transcript_source "ena"; transcript_biotype "protein_coding";	175	3
DS499599	522081	522082	DS499599	522244	522247	AFUB_074020	.	+	ena	start_codon	0	gene_id "AFUB_074020"; transcript_id "EDP49375"; exon_number "1"; gene_source "ena"; gene_biotype "protein_coding"; transcript_source "ena"; transcript_biotype "protein_coding";	163	3
DS499599	525696	525697	DS499599	525822	525825	AFUB_074040	.	+	ena	start_codon	0	gene_id "AFUB_074040"; transcript_id "EDP49377"; exon_number "1"; gene_source "ena"; gene_biotype "protein_coding"; transcript_source "ena"; transcript_biotype "protein_coding";	126	3
DS499599	539755	539756	DS499599	539918	539921	AFUB_074100	.	+	ena	start_codon	0	gene_id "AFUB_074100"; transcript_id "EDP49383"; exon_number "1"; gene_source "ena"; gene_biotype "protein_coding"; transcript_source "ena"; transcript_biotype "protein_coding";	163	3
DS499599	556632	556633	DS499599	556701	556704	AFUB_074140	.	+	ena	start_codon	0	gene_id "AFUB_074140"; transcript_id "EDP49387"; exon_number "1"; gene_source "ena"; gene_biotype "protein_coding"; transcript_source "ena"; transcript_biotype "protein_coding";	69	3
DS499599	568435	568436	DS499599	569109	569112	AFUB_074160	.	+	ena	start_codon	0	gene_id "AFUB_074160"; transcript_id "EDP49389"; exon_number "1"; gene_source "ena"; gene_biotype "protein_coding"; transcript_source "ena"; transcript_biotype "protein_coding";	674	3
DS499599	576638	576639	DS499599	576752	576755	AFUB_074190	.	+	ena	start_codon	0	gene_id "AFUB_074190"; transcript_id "EDP49392"; exon_number "1"; gene_source "ena"; gene_biotype "protein_coding"; transcript_source "ena"; transcript_biotype "protein_coding";	114	3
DS499599	586042	586043	DS499599	586033	586202	AFUB_074210	.	+	ena	exon	.	gene_id "AFUB_074210"; transcript_id "EDP49394"; exon_number "1"; gene_source "ena"; gene_biotype "protein_coding"; transcript_source "ena"; transcript_biotype "protein_coding"; exon_id "EDP49394-1";	0	3
DS499599	598235	598236	DS499599	598481	598484	AFUB_074260	.	+	ena	start_codon	0	gene_id "AFUB_074260"; transcript_id "EDP49399"; exon_number "1"; gene_source "ena"; gene_biotype "protein_coding"; transcript_source "ena"; transcript_biotype "protein_coding";	246	3
DS499599	615196	615197	DS499599	615671	615674	AFUB_074320	.	+	ena	start_codon	0	gene_id "AFUB_074320"; transcript_id "EDP49405"; exon_number "1"; gene_source "ena"; gene_biotype "protein_coding"; transcript_source "ena"; transcript_biotype "protein_coding";	475	3
DS499599	689928	689929	DS499599	690248	690251	AFUB_074540	.	+	ena	start_codon	0	gene_id "AFUB_074540"; transcript_id "EDP49427"; exon_number "1"; gene_source "ena"; gene_biotype "protein_coding"; transcript_source "ena"; transcript_biotype "protein_coding";	320	3
DS499599	701098	701099	DS499599	701164	701167	AFUB_074580	.	+	ena	start_codon	0	gene_id "AFUB_074580"; transcript_id "EDP49431"; exon_number "1"; gene_source "ena"; gene_biotype "protein_coding"; transcript_source "ena"; transcript_biotype "protein_coding";	66	3
DS499599	703580	703581	DS499599	703675	703678	AFUB_074600	.	+	ena	start_codon	0	gene_id "AFUB_074600"; transcript_id "EDP49433"; exon_number "1"; gene_source "ena"; gene_biotype "protein_coding"; transcript_source "ena"; transcript_biotype "protein_coding";	95	3
DS499599	715369	715370	DS499599	715462	715465	AFUB_074640	.	+	ena	start_codon	0	gene_id "AFUB_074640"; transcript_id "EDP49437"; exon_number "1"; gene_source "ena"; gene_biotype "protein_coding"; transcript_source "ena"; transcript_biotype "protein_coding";	93	3
DS499599	742168	742169	DS499599	742311	742314	AFUB_074750	.	+	ena	start_codon	0	gene_id "AFUB_074750"; transcript_id "EDP49448"; exon_number "1"; gene_source "ena"; gene_biotype "protein_coding"; transcript_source "ena"; transcript_biotype "protein_coding";	143	3
DS499599	748402	748403	DS499599	748670	748673	AFUB_074780	.	+	ena	start_codon	0	gene_id "AFUB_074780"; transcript_id "EDP49451"; exon_number "1"; gene_source "ena"; gene_biotype "protein_coding"; transcript_source "ena"; transcript_biotype "protein_coding";	268	3
DS499599	761150	761151	DS499599	761194	761197	AFUB_074810	.	+	ena	start_codon	0	gene_id "AFUB_074810"; transcript_id "EDP49454"; exon_number "1"; gene_source "ena"; gene_biotype "protein_coding"; transcript_source "ena"; transcript_biotype "protein_coding";	44	3
DS499599	780380	780381	DS499599	780466	780469	AFUB_074870	.	+	ena	start_codon	0	gene_id "AFUB_074870"; transcript_id "EDP49460"; exon_number "1"; gene_source "ena"; gene_biotype "protein_coding"; transcript_source "ena"; transcript_biotype "protein_coding";	86	3
DS499599	797187	797188	DS499599	797816	797819	AFUB_074950	.	+	ena	start_codon	0	gene_id "AFUB_074950"; transcript_id "EDP49468"; exon_number "1"; gene_source "ena"; gene_biotype "protein_coding"; transcript_source "ena"; transcript_biotype "protein_coding";	629	3
DS499599	802465	802466	DS499599	802561	802564	AFUB_074970	.	+	ena	start_codon	0	gene_id "AFUB_074970"; transcript_id "EDP49470"; exon_number "1"; gene_source "ena"; gene_biotype "protein_coding"; transcript_source "ena"; transcript_biotype "protein_coding";	96	3
DS499599	813283	813284	DS499599	813323	813326	AFUB_075010	.	+	ena	start_codon	0	gene_id "AFUB_075010"; transcript_id "EDP49474"; exon_number "1"; gene_source "ena"; gene_biotype "protein_coding"; transcript_source "ena"; transcript_biotype "protein_coding";	40	3
DS499599	815965	815966	DS499599	816411	816414	AFUB_075030	.	+	ena	start_codon	0	gene_id "AFUB_075030"; transcript_id "EDP49476"; exon_number "1"; gene_source "ena"; gene_biotype "protein_coding"; transcript_source "ena"; transcript_biotype "protein_coding";	446	3
DS499599	825768	825769	DS499599	825900	825903	AFUB_075090	.	+	ena	start_codon	0	gene_id "AFUB_075090"; transcript_id "EDP49480"; exon_number "1"; gene_source "ena"; gene_biotype "protein_coding"; transcript_source "ena"; transcript_biotype "protein_coding";	132	3
DS499599	853475	853476	DS499599	853968	853971	AFUB_075210	.	+	ena	start_codon	0	gene_id "AFUB_075210"; transcript_id "EDP49492"; exon_number "1"; gene_source "ena"; gene_biotype "protein_coding"; transcript_source "ena"; transcript_biotype "protein_coding";	493	3
DS499599	968214	968215	DS499599	968508	968511	AFUB_075450	.	+	ena	start_codon	0	gene_id "AFUB_075450"; transcript_id "EDP49515"; exon_number "1"; gene_source "ena"; gene_biotype "protein_coding"; transcript_source "ena"; transcript_biotype "protein_coding";	294	3
DS499599	1020310	1020311	DS499599	1020546	1020549	AFUB_075570	.	+	ena	start_codon	0	gene_id "AFUB_075570"; transcript_id "EDP49527"; exon_number "1"; gene_source "ena"; gene_biotype "protein_coding"; transcript_source "ena"; transcript_biotype "protein_coding";	236	3
DS499599	1037578	1037579	DS499599	1037646	1037649	AFUB_075640	.	+	ena	start_codon	0	gene_id "AFUB_075640"; transcript_id "EDP49534"; exon_number "1"; gene_source "ena"; gene_biotype "protein_coding"; transcript_source "ena"; transcript_biotype "protein_coding";	68	3
DS499599	1072430	1072431	DS499599	1072470	1072473	AFUB_075790	.	+	ena	start_codon	0	gene_id "AFUB_075790"; transcript_id "EDP49549"; exon_number "1"; gene_source "ena"; gene_biotype "protein_coding"; transcript_source "ena"; transcript_biotype "protein_coding";	40	3
DS499599	1139046	1139047	DS499599	1139777	1139780	AFUB_075980	.	+	ena	start_codon	0	gene_id "AFUB_075980"; transcript_id "EDP49568"; exon_number "1"; gene_source "ena"; gene_biotype "protein_coding"; transcript_source "ena"; transcript_biotype "protein_coding";	731	3
DS499599	1157189	1157190	DS499599	1157410	1157413	AFUB_076040	.	+	ena	start_codon	0	gene_id "AFUB_076040"; transcript_id "EDP49574"; exon_number "1"; gene_source "ena"; gene_biotype "protein_coding"; transcript_source "ena"; transcript_biotype "protein_coding";	221	3
DS499599	1161803	1161804	DS499599	1161985	1161988	AFUB_076050	.	+	ena	start_codon	0	gene_id "AFUB_076050"; transcript_id "EDP49575"; exon_number "1"; gene_source "ena"; gene_biotype "protein_coding"; transcript_source "ena"; transcript_biotype "protein_coding";	182	3
DS499599	1174456	1174457	DS499599	1174727	1174730	AFUB_076110	.	+	ena	start_codon	0	gene_id "AFUB_076110"; transcript_id "EDP49581"; exon_number "1"; gene_source "ena"; gene_biotype "protein_coding"; transcript_source "ena"; transcript_biotype "protein_coding";	271	3
DS499599	1179498	1179499	DS499599	1179598	1179601	AFUB_076130	.	+	ena	start_codon	0	gene_id "AFUB_076130"; transcript_id "EDP49583"; exon_number "1"; gene_source "ena"; gene_biotype "protein_coding"; transcript_source "ena"; transcript_biotype "protein_coding";	100	3
DS499599	1234145	1234146	DS499599	1234305	1234308	AFUB_076350	.	+	ena	start_codon	0	gene_id "AFUB_076350"; transcript_id "EDP49605"; exon_number "1"; gene_source "ena"; gene_biotype "protein_coding"; transcript_source "ena"; transcript_biotype "protein_coding";	160	3
DS499599	1241867	1241868	DS499599	1242013	1242016	AFUB_076390	.	+	ena	start_codon	0	gene_id "AFUB_076390"; transcript_id "EDP49609"; exon_number "1"; gene_source "ena"; gene_biotype "protein_coding"; transcript_source "ena"; transcript_biotype "protein_coding";	146	3
DS499599	1266597	1266598	DS499599	1266698	1266701	AFUB_076460	.	+	ena	start_codon	0	gene_id "AFUB_076460"; transcript_id "EDP49616"; exon_number "1"; gene_source "ena"; gene_biotype "protein_coding"; transcript_source "ena"; transcript_biotype "protein_coding";	101	3
DS499599	1277242	1277243	DS499599	1277096	1277482	AFUB_076500	.	+	ena	CDS	0	gene_id "AFUB_076500"; transcript_id "EDP49620"; exon_number "1"; gene_source "ena"; gene_biotype "protein_coding"; transcript_source "ena"; transcript_biotype "protein_coding"; protein_id "EDP49620";	0	3
DS499599	1283799	1283800	DS499599	1283835	1283838	AFUB_076520	.	+	ena	start_codon	0	gene_id "AFUB_076520"; transcript_id "EDP49622"; exon_number "1"; gene_source "ena"; gene_biotype "protein_coding"; transcript_source "ena"; transcript_biotype "protein_coding";	36	3
DS499599	1296144	1296145	DS499599	1296180	1296183	AFUB_076580	.	+	ena	start_codon	0	gene_id "AFUB_076580"; transcript_id "EDP49628"; exon_number "1"; gene_source "ena"; gene_biotype "protein_coding"; transcript_source "ena"; transcript_biotype "protein_coding";	36	3
DS499599	1302803	1302804	DS499599	1302889	1302892	AFUB_076610	.	+	ena	start_codon	0	gene_id "AFUB_076610"; transcript_id "EDP49631"; exon_number "1"; gene_source "ena"; gene_biotype "protein_coding"; transcript_source "ena"; transcript_biotype "protein_coding";	86	3
DS499599	1312676	1312677	DS499599	1313060	1313063	AFUB_076650	.	+	ena	start_codon	0	gene_id "AFUB_076650"; transcript_id "EDP49635"; exon_number "1"; gene_source "ena"; gene_biotype "protein_coding"; transcript_source "ena"; transcript_biotype "protein_coding";	384	3
DS499599	1329243	1329244	DS499599	1329285	1329288	AFUB_076730	.	+	ena	start_codon	0	gene_id "AFUB_076730"; transcript_id "EDP49643"; exon_number "1"; gene_source "ena"; gene_biotype "protein_coding"; transcript_source "ena"; transcript_biotype "protein_coding";	42	3
DS499599	1330894	1330895	DS499599	1331091	1331094	AFUB_076740	.	+	ena	start_codon	0	gene_id "AFUB_076740"; transcript_id "EDP49644"; exon_number "1"; gene_source "ena"; gene_biotype "protein_coding"; transcript_source "ena"; transcript_biotype "protein_coding";	197	3
DS499599	1348287	1348288	DS499599	1348365	1348368	AFUB_076810	.	+	ena	start_codon	0	gene_id "AFUB_076810"; transcript_id "EDP49651"; exon_number "1"; gene_source "ena"; gene_biotype "protein_coding"; transcript_source "ena"; transcript_biotype "protein_coding";	78	3
DS499599	1385726	1385727	DS499599	1386059	1386062	AFUB_077000	.	+	ena	start_codon	0	gene_id "AFUB_077000"; transcript_id "EDP49670"; exon_number "1"; gene_source "ena"; gene_biotype "protein_coding"; transcript_source "ena"; transcript_biotype "protein_coding";	333	3
DS499599	1413260	1413261	DS499599	1413302	1413305	AFUB_077090	.	+	ena	start_codon	0	gene_id "AFUB_077090"; transcript_id "EDP49679"; exon_number "1"; gene_source "ena"; gene_biotype "protein_coding"; transcript_source "ena"; transcript_biotype "protein_coding";	42	3
DS499599	1434156	1434157	DS499599	1434097	1435280	AFUB_077150	.	+	ena	gene	.	gene_id "AFUB_077150"; gene_source "ena"; gene_biotype "protein_coding";	0	3
DS499599	1438446	1438447	DS499599	1438550	1438553	AFUB_077170	.	+	ena	start_codon	0	gene_id "AFUB_077170"; transcript_id "EDP49687"; exon_number "1"; gene_source "ena"; gene_biotype "protein_coding"; transcript_source "ena"; transcript_biotype "protein_coding";	104	3
DS499599	1470876	1470877	DS499599	1471184	1471187	AFUB_077260	.	+	ena	start_codon	0	gene_id "AFUB_077260"; transcript_id "EDP49696"; exon_number "1"; gene_source "ena"; gene_biotype "protein_coding"; transcript_source "ena"; transcript_biotype "protein_coding";	308	3
DS499599	1474098	1474099	DS499599	1473764	1474182	AFUB_077280	.	+	ena	CDS	0	gene_id "AFUB_077280"; transcript_id "EDP49698"; exon_number "1"; gene_source "ena"; gene_biotype "protein_coding"; transcript_source "ena"; transcript_biotype "protein_coding"; protein_id "EDP49698";	0	3
DS499599	1488480	1488481	DS499599	1488623	1488626	AFUB_077330	.	+	ena	start_codon	0	gene_id "AFUB_077330"; transcript_id "EDP49703"; exon_number "1"; gene_source "ena"; gene_biotype "protein_coding"; transcript_source "ena"; transcript_biotype "protein_coding";	143	3
DS499599	1503888	1503889	DS499599	1503951	1503954	AFUB_077370	.	+	ena	start_codon	0	gene_id "AFUB_077370"; transcript_id "EDP49707"; exon_number "1"; gene_source "ena"; gene_biotype "protein_coding"; transcript_source "ena"; transcript_biotype "protein_coding";	63	3
DS499599	1509325	1509326	DS499599	1509470	1509473	AFUB_077390	.	+	ena	start_codon	0	gene_id "AFUB_077390"; transcript_id "EDP49709"; exon_number "1"; gene_source "ena"; gene_biotype "protein_coding"; transcript_source "ena"; transcript_biotype "protein_coding";	145	3
DS499599	1511053	1511054	DS499599	1511255	1511258	AFUB_077400	.	+	ena	start_codon	0	gene_id "AFUB_077400"; transcript_id "EDP49710"; exon_number "1"; gene_source "ena"; gene_biotype "protein_coding"; transcript_source "ena"; transcript_biotype "protein_coding";	202	3
DS499599	1524762	1524763	DS499599	1524603	1524851	AFUB_077440	.	+	ena	CDS	0	gene_id "AFUB_077440"; transcript_id "EDP49714"; exon_number "1"; gene_source "ena"; gene_biotype "protein_coding"; transcript_source "ena"; transcript_biotype "protein_coding"; protein_id "EDP49714";	0	3
DS499599	1537182	1537183	DS499599	1537330	1537333	AFUB_077480	.	+	ena	start_codon	0	gene_id "AFUB_077480"; transcript_id "EDP49718"; exon_number "1"; gene_source "ena"; gene_biotype "protein_coding"; transcript_source "ena"; transcript_biotype "protein_coding";	148	3
DS499599	1543076	1543077	DS499599	1543354	1543357	AFUB_077520	.	+	ena	start_codon	0	gene_id "AFUB_077520"; transcript_id "EDP49722"; exon_number "1"; gene_source "ena"; gene_biotype "protein_coding"; transcript_source "ena"; transcript_biotype "protein_coding";	278	3
DS499599	1571635	1571636	DS499599	1571692	1571695	AFUB_077640	.	+	ena	start_codon	0	gene_id "AFUB_077640"; transcript_id "EDP49734"; exon_number "1"; gene_source "ena"; gene_biotype "protein_coding"; transcript_source "ena"; transcript_biotype "protein_coding";	57	3
DS499599	1645737	1645738	DS499599	1645688	1646282	AFUB_077850	.	+	ena	CDS	0	gene_id "AFUB_077850"; transcript_id "EDP49753"; exon_number "1"; gene_source "ena"; gene_biotype "protein_coding"; transcript_source "ena"; transcript_biotype "protein_coding"; protein_id "EDP49753";	0	3
DS499599	1726468	1726469	DS499599	1726522	1726525	AFUB_078080	.	+	ena	start_codon	0	gene_id "AFUB_078080"; transcript_id "EDP49777"; exon_number "1"; gene_source "ena"; gene_biotype "protein_coding"; transcript_source "ena"; transcript_biotype "protein_coding";	54	3
DS499599	1747987	1747988	DS499599	1748041	1748044	AFUB_078170	.	+	ena	start_codon	0	gene_id "AFUB_078170"; transcript_id "EDP49785"; exon_number "1"; gene_source "ena"; gene_biotype "protein_coding"; transcript_source "ena"; transcript_biotype "protein_coding";	54	3
DS499599	1772709	1772710	DS499599	1772750	1772753	AFUB_078280	.	+	ena	start_codon	0	gene_id "AFUB_078280"; transcript_id "EDP49796"; exon_number "1"; gene_source "ena"; gene_biotype "protein_coding"; transcript_source "ena"; transcript_biotype "protein_coding";	41	3
DS499599	1785469	1785470	DS499599	1785523	1785526	AFUB_078310	.	+	ena	start_codon	0	gene_id "AFUB_078310"; transcript_id "EDP49799"; exon_number "1"; gene_source "ena"; gene_biotype "protein_coding"; transcript_source "ena"; transcript_biotype "protein_coding";	54	3
DS499599	1805725	1805726	DS499599	1805426	1808365	AFUB_078370	.	+	ena	gene	.	gene_id "AFUB_078370"; gene_source "ena"; gene_biotype "protein_coding";	0	3
DS499599	1828466	1828467	DS499599	1828629	1828632	AFUB_078430	.	+	ena	start_codon	0	gene_id "AFUB_078430"; transcript_id "EDP49810"; exon_number "1"; gene_source "ena"; gene_biotype "protein_coding"; transcript_source "ena"; transcript_biotype "protein_coding";	163	3
DS499599	1853102	1853103	DS499599	1853800	1853803	AFUB_078540	.	+	ena	start_codon	0	gene_id "AFUB_078540"; transcript_id "EDP49821"; exon_number "1"; gene_source "ena"; gene_biotype "protein_coding"; transcript_source "ena"; transcript_biotype "protein_coding";	698	3
DS499599	1856729	1856730	DS499599	1857308	1857311	AFUB_078550	.	+	ena	start_codon	0	gene_id "AFUB_078550"; transcript_id "EDP49822"; exon_number "1"; gene_source "ena"; gene_biotype "protein_coding"; transcript_source "ena"; transcript_biotype "protein_coding";	579	3
DS499599	1875477	1875478	DS499599	1875533	1875536	AFUB_078610	.	+	ena	start_codon	0	gene_id "AFUB_078610"; transcript_id "EDP49828"; exon_number "1"; gene_source "ena"; gene_biotype "protein_coding"; transcript_source "ena"; transcript_biotype "protein_coding";	56	3
DS499599	1878787	1878788	DS499599	1878859	1878862	AFUB_078630	.	+	ena	start_codon	0	gene_id "AFUB_078630"; transcript_id "EDP49830"; exon_number "1"; gene_source "ena"; gene_biotype "protein_coding"; transcript_source "ena"; transcript_biotype "protein_coding";	72	3
DS499599	1886505	1886506	DS499599	1886565	1886568	AFUB_078660	.	+	ena	start_codon	0	gene_id "AFUB_078660"; transcript_id "EDP49833"; exon_number "1"; gene_source "ena"; gene_biotype "protein_coding"; transcript_source "ena"; transcript_biotype "protein_coding";	60	3
DS499599	1890362	1890363	DS499599	1890435	1890438	AFUB_078680	.	+	ena	start_codon	0	gene_id "AFUB_078680"; transcript_id "EDP49835"; exon_number "1"; gene_source "ena"; gene_biotype "protein_coding"; transcript_source "ena"; transcript_biotype "protein_coding";	73	3
DS499599	1904151	1904152	DS499599	1904504	1904507	AFUB_078730	.	+	ena	start_codon	0	gene_id "AFUB_078730"; transcript_id "EDP49840"; exon_number "1"; gene_source "ena"; gene_biotype "protein_coding"; transcript_source "ena"; transcript_biotype "protein_coding";	353	3
DS499599	1907485	1907486	DS499599	1907549	1907552	AFUB_078740	.	+	ena	start_codon	0	gene_id "AFUB_078740"; transcript_id "EDP49841"; exon_number "1"; gene_source "ena"; gene_biotype "protein_coding"; transcript_source "ena"; transcript_biotype "protein_coding";	64	3
DS499599	1910487	1910488	DS499599	1910552	1910555	AFUB_078760	.	+	ena	start_codon	0	gene_id "AFUB_078760"; transcript_id "EDP49843"; exon_number "1"; gene_source "ena"; gene_biotype "protein_coding"; transcript_source "ena"; transcript_biotype "protein_coding";	65	3
DS499599	1923728	1923729	DS499599	1923751	1923754	AFUB_078820	.	+	ena	start_codon	0	gene_id "AFUB_078820"; transcript_id "EDP49849"; exon_number "1"; gene_source "ena"; gene_biotype "protein_coding"; transcript_source "ena"; transcript_biotype "protein_coding";	23	3
DS499599	1942805	1942806	DS499599	1942990	1942993	AFUB_078910	.	+	ena	start_codon	0	gene_id "AFUB_078910"; transcript_id "EDP49858"; exon_number "1"; gene_source "ena"; gene_biotype "protein_coding"; transcript_source "ena"; transcript_biotype "protein_coding";	185	3
DS499599	1964850	1964851	DS499599	1965112	1965115	AFUB_078970	.	+	ena	start_codon	0	gene_id "AFUB_078970"; transcript_id "EDP49864"; exon_number "1"; gene_source "ena"; gene_biotype "protein_coding"; transcript_source "ena"; transcript_biotype "protein_coding";	262	3
DS499599	2036871	2036872	DS499599	2037211	2037214	AFUB_079240	.	+	ena	start_codon	0	gene_id "AFUB_079240"; transcript_id "EDP49891"; exon_number "1"; gene_source "ena"; gene_biotype "protein_coding"; transcript_source "ena"; transcript_biotype "protein_coding";	340	3
DS499599	2080349	2080350	DS499599	2080652	2080655	AFUB_079410	.	+	ena	start_codon	0	gene_id "AFUB_079410"; transcript_id "EDP49908"; exon_number "1"; gene_source "ena"; gene_biotype "protein_coding"; transcript_source "ena"; transcript_biotype "protein_coding";	303	3
DS499600	71279	71280	DS499600	71326	71329	AFUB_080170	.	+	ena	start_codon	0	gene_id "AFUB_080170"; transcript_id "EDP48582"; exon_number "1"; gene_source "ena"; gene_biotype "protein_coding"; transcript_source "ena"; transcript_biotype "protein_coding";	47	3
DS499600	164971	164972	DS499600	166092	166095	AFUB_080300	.	+	ena	start_codon	0	gene_id "AFUB_080300"; transcript_id "EDP48595"; exon_number "1"; gene_source "ena"; gene_biotype "protein_coding"; transcript_source "ena"; transcript_biotype "protein_coding";	1121	3
DS499600	172750	172751	DS499600	172834	172837	AFUB_080320	.	+	ena	start_codon	0	gene_id "AFUB_080320"; transcript_id "EDP48597"; exon_number "1"; gene_source "ena"; gene_biotype "protein_coding"; transcript_source "ena"; transcript_biotype "protein_coding";	84	3
DS499600	223440	223441	DS499600	223494	223497	AFUB_080420	.	+	ena	start_codon	0	gene_id "AFUB_080420"; transcript_id "EDP48607"; exon_number "1"; gene_source "ena"; gene_biotype "protein_coding"; transcript_source "ena"; transcript_biotype "protein_coding";	54	3
[truncated: 1,407 more rows]

## Sheet: 5_end_confidence_2
Chromosome of END-site	Start-position of END-site	End-position of END-site	Choromosome of genomic feature	Start-position of genomic feature	End-position of genomic feature	gene	score	strand	source = European Nucleotide Archive	feature	frame	attribute	distance of the END-site to the feature	confidence value	comments
[truncated: 188 more rows]

[truncated: 4 more sheets: 5_end_confidence_1, 3_end_confidence_3, 3_end_confidence_2, 3_end_confidence_1]
